# Supplementary material for: Tension-driven multi-scale self-organisation in human iPSC-derived muscle fibers
Source: bioRxiv preprint, doi:10.1101/2021.10.24.465614, version 2 (2022-01-05)
Supplement: Supplementary Table 1 [file 465614_file09.xlsx]

## Sheet: summary
sheet number	content	information
1	raw counts with baseline	raw counts with generated baseline pseudo-counts
2	normalised counts	normalised read counts of samples
3	transformed counts	rlog transformed read counts of samples
4	SKGM 2 vs baseline	differential expression analysis comparing growth medium to baseline
5	KCTiP 7 vs baseline	differential expression analysis comparing day 7 of differentiation to baseline
6	KCTiP 15 vs baseline	differential expression analysis comparing day 15 of differentiation to baseline
7	KCTiP 7 vs SKGM 2	differential expression analysis comparing day 7 of differentiation to growth medium
8	selected list for figure 3C	differential expression for genes shown in Figure 3C
9	FILT-0.2-cluster-1	gene members of cluster 1 (membership value >0.2)
10	FILT-0.2-cluster-2	gene members of cluster 2 (membership value >0.2)
11	FILT-0.2-cluster-3	gene members of cluster 3 (membership value >0.2)
12	FILT-0.2-cluster-4	gene members of cluster 4 (membership value >0.2)
13	FILT-0.2-cluster-5	gene members of cluster 5 (membership value >0.2)
14	FILT-0.2-cluster-6	gene members of cluster 6 (membership value >0.2)
15	FILT-0.2-cluster-7	gene members of cluster 7 (membership value >0.2)
16	FILT-0.2-cluster-8	gene members of cluster 8 (membership value >0.2)
17	FILT-0.2-cluster-9	gene members of cluster 9 (membership value >0.2)
18	FILT-0.2-cluster-10	gene members of cluster 10 (membership value >0.2)
19	Clust1_GO_Biological_Process	enriched GO-terms in cluster 1
20	Clust2_GO_Biological_Process	enriched GO-terms in cluster 2
21	Clust3_GO_Biological_Process	enriched GO-terms in cluster 3
22	Clust4_GO_Biological_Process	enriched GO-terms in cluster 4
23	Clust5_GO_Biological_Process	enriched GO-terms in cluster 5
24	Clust6_GO_Biological_Process	enriched GO-terms in cluster 6
25	Clust7_GO_Biological_Process	enriched GO-terms in cluster 7
26	Clust8_GO_Biological_Process	enriched GO-terms in cluster 8
27	Clust9_GO_Biological_Process	enriched GO-terms in cluster 9
28	Clust10_GO_Biological_Proces	enriched GO-terms in cluster 10

## Sheet: 1_raw counts_with_baseline
gene_name	ensembl	SKGM_2d_1	SKGM_2d_2	SKGM_2d_3	KCTiP_7d_1	KCTiP_7d_2	KCTiP_7d_3	KCTiP_15d_1	KCTiP_15d_2	KCTiP_15d_3	baseline_1	baseline_2	baseline_3
TSPAN6	ENSG00000000003	478	440	418	606	673	577	786	547	905	623	553	633
TNMD	ENSG00000000005	24	38	48	219	274	230	232	215	326	158	176	201
DPM1	ENSG00000000419	739	847	730	359	431	359	602	633	741	567	637	610
SCYL3	ENSG00000000457	272	241	237	203	267	230	287	263	329	254	257	265
C1orf112	ENSG00000000460	394	394	380	150	207	153	234	205	295	259	269	276
FGR	ENSG00000000938	2	0	1	4	2	1	2	0	1	3	1	1
CFH	ENSG00000000971	743	740	717	560	655	623	612	592	741	638	662	694
FUCA2	ENSG00000001036	1402	1419	1403	797	866	721	801	688	984	1000	991	1036
GCLC	ENSG00000001084	436	443	424	182	244	214	269	276	312	296	321	317
NFYA	ENSG00000001167	931	868	897	597	749	731	1015	934	1082	848	850	903
STPG1	ENSG00000001460	110	125	164	33	47	50	54	50	54	66	74	89
NIPAL3	ENSG00000001461	192	162	191	144	169	185	225	174	220	187	168	199
LAS1L	ENSG00000001497	1113	1000	1054	512	588	525	526	535	585	717	708	721
ENPP4	ENSG00000001561	94	81	63	169	231	224	282	224	303	182	179	197
SEMA3F	ENSG00000001617	177	143	179	314	278	260	184	167	216	225	196	218
CFTR	ENSG00000001626	1	0	0	3	3	4	4	9	2	3	4	2
ANKIB1	ENSG00000001629	999	952	840	552	816	766	1114	963	1199	888	910	935
CYP51A1	ENSG00000001630	1628	1580	1479	1458	1977	1596	2448	1999	2981	1845	1852	2019
KRIT1	ENSG00000001631	518	470	445	353	535	502	626	643	733	499	549	560
RAD52	ENSG00000002016	145	132	128	215	293	234	238	187	279	199	204	214
MYH16	ENSG00000002079	3	1	4	1	2	2	2	6	2	2	3	3
BAD	ENSG00000002330	324	320	383	255	227	203	251	178	281	277	242	289
LAP3	ENSG00000002549	1154	1269	1272	638	701	554	740	639	812	844	870	879
CD99	ENSG00000002586	5341	5273	6028	3829	3942	3238	3726	4684	4705	4299	4633	4657
HS3ST1	ENSG00000002587	14	15	21	103	97	91	126	117	151	81	76	88
AOC1	ENSG00000002726	1	1	2	0	2	0	1	1	0	1	1	1
WNT16	ENSG00000002745	55	52	72	50	35	43	112	99	143	72	62	86
HECW1	ENSG00000002746	135	93	126	68	107	84	81	108	102	95	103	104
MAD1L1	ENSG00000002822	525	487	547	264	288	234	249	259	279	346	345	353
LASP1	ENSG00000002834	12432	11659	12911	3435	3893	3427	3722	3802	4452	6530	6451	6930
SNX11	ENSG00000002919	251	258	257	190	158	135	194	126	264	212	181	219
TMEM176A	ENSG00000002933	34	41	51	52	76	86	73	82	95	53	66	77
M6PR	ENSG00000003056	1361	1228	1344	699	852	733	837	925	947	966	1002	1008
KLHL13	ENSG00000003096	133	135	126	239	324	320	673	624	714	348	361	387
CYP26B1	ENSG00000003137	26	7	19	39	38	37	36	37	38	34	27	31
ICA1	ENSG00000003147	14	12	12	10	11	11	6	8	10	10	10	11
DBNDD1	ENSG00000003249	164	177	174	134	143	119	129	175	158	142	165	150
ALS2	ENSG00000003393	1082	991	960	950	1154	1035	1171	1149	1327	1068	1098	1107
CASP10	ENSG00000003400	3	3	1	6	5	2	5	7	5	5	5	3
CFLAR	ENSG00000003402	462	326	394	579	721	673	718	684	791	586	577	619
TFPI	ENSG00000003436	2314	2020	1619	720	1028	888	1288	1344	1546	1441	1464	1351
NDUFAF7	ENSG00000003509	381	320	347	300	352	292	389	375	427	357	349	355
RBM5	ENSG00000003756	1475	1319	1449	3281	4219	3505	3578	3361	3802	2778	2966	2919
MTMR7	ENSG00000003987	69	63	60	36	71	55	105	108	120	70	81	78
SLC7A2	ENSG00000003989	793	653	600	491	636	581	858	611	837	714	633	673
ARF5	ENSG00000004059	760	710	830	664	726	547	714	1065	935	713	834	771
SARM1	ENSG00000004139	400	344	410	486	586	493	508	421	538	465	450	480
POLDIP2	ENSG00000004142	2188	2070	2335	1107	1120	915	1115	1142	1352	1470	1444	1534
PLXND1	ENSG00000004399	859	717	932	1045	1100	989	784	693	923	896	837	948
AK2	ENSG00000004455	1996	2042	2189	1146	1318	1089	1465	1617	1758	1536	1659	1679
CD38	ENSG00000004468	4	0	1	5	3	3	3	3	2	4	2	2
FKBP4	ENSG00000004478	3849	3809	4013	992	893	819	1031	1018	1303	1957	1907	2045
KDM1A	ENSG00000004487	3786	3789	4007	2269	2385	2116	3058	3055	3451	3038	3076	3191
RBM6	ENSG00000004534	1757	1719	1786	1929	2162	1936	1872	2129	2071	1853	2003	1931
CAMKK1	ENSG00000004660	116	136	139	91	98	84	79	57	94	95	97	106
RECQL	ENSG00000004700	2150	1926	1687	422	606	552	725	577	824	1099	1036	1021
VPS50	ENSG00000004766	381	334	291	238	338	296	406	446	510	342	373	366
HSPB6	ENSG00000004776	817	769	1051	1198	1205	977	1131	2837	1539	1049	1604	1189
ARHGAP33	ENSG00000004777	264	171	279	359	365	317	262	268	299	295	268	298
NDUFAB1	ENSG00000004779	856	915	851	543	584	473	778	595	866	726	698	730
PDK4	ENSG00000004799	30	27	16	229	251	247	286	249	315	182	176	193
SLC22A16	ENSG00000004809	0	0	0	0	1	0	0	0	0	0	0	0
ZMYND10	ENSG00000004838	2	0	7	11	14	11	19	23	32	11	12	17
ABCB5	ENSG00000004846	3	6	4	11	26	21	54	58	59	23	30	28
ARX	ENSG00000004848	8	6	6	50	88	51	70	97	90	43	64	49
SLC25A13	ENSG00000004864	792	765	767	383	420	393	585	491	695	587	559	618
ST7	ENSG00000004866	476	458	506	274	316	246	276	331	357	342	368	370
CDC27	ENSG00000004897	2599	2486	2161	913	1208	1036	1795	1823	2030	1769	1839	1742
SLC4A1	ENSG00000004939	0	0	0	0	0	0	1	0	0	0	0	0
CALCR	ENSG00000004948	0	0	0	0	2	1	5	2	4	2	1	2
HCCS	ENSG00000004961	480	471	477	262	360	269	430	430	497	391	420	414
DVL2	ENSG00000004975	800	750	897	608	667	608	613	593	817	674	670	774
PRSS22	ENSG00000005001	0	0	0	0	0	0	0	0	0	0	0	0
UPF1	ENSG00000005007	1915	1692	1954	1163	1243	1044	1124	995	1294	1401	1310	1431
SKAP2	ENSG00000005020	331	271	296	342	424	452	578	558	639	417	418	462
SLC25A5	ENSG00000005022	4642	4675	4286	1676	1744	1581	2207	1780	2722	2842	2733	2863
MCUB	ENSG00000005059	413	381	367	125	158	114	230	199	262	256	246	248
HOXA11	ENSG00000005073	19	13	28	3	7	5	4	6	1	9	9	11
POLR2J	ENSG00000005075	347	326	390	176	195	164	207	211	310	243	244	288
DHX33	ENSG00000005100	1062	941	987	426	531	421	586	494	603	691	655	670
MEOX1	ENSG00000005102	2	0	3	20	13	18	34	41	39	19	18	20
THSD7A	ENSG00000005108	425	340	293	407	514	462	531	458	480	454	437	412
LIG3	ENSG00000005156	1013	950	979	651	750	708	864	813	919	843	838	869
RPAP3	ENSG00000005175	746	716	640	381	439	435	550	664	677	559	606	584
ACSM3	ENSG00000005187	54	47	36	82	112	89	204	211	193	113	123	106
REXO5	ENSG00000005189	242	236	222	64	57	76	63	52	65	123	115	121
CIAPIN1	ENSG00000005194	885	1000	928	519	540	466	655	500	829	686	680	741
SPPL2B	ENSG00000005206	254	220	320	702	723	627	459	364	551	472	436	499
FAM214B	ENSG00000005238	355	313	357	345	392	321	296	366	408	332	357	362
COPZ2	ENSG00000005243	188	169	183	359	357	329	270	199	322	272	242	278
PRKAR2B	ENSG00000005249	191	184	189	136	176	147	256	234	250	194	198	195
MSL3	ENSG00000005302	488	378	446	428	481	424	521	588	595	479	482	488
CREBBP	ENSG00000005339	1925	1598	1826	1661	2076	1845	2081	2404	2109	1889	2026	1927
TSPOAP1	ENSG00000005379	36	32	32	94	94	77	98	83	113	76	70	74
MPO	ENSG00000005381	0	0	0	0	0	0	0	1	1	0	0	0
PON1	ENSG00000005421	0	0	0	3	1	1	2	1	0	2	1	0
GCFC2	ENSG00000005436	438	434	343	175	240	199	413	365	458	342	346	333
WDR54	ENSG00000005448	238	278	294	115	96	85	114	87	151	156	154	177
CROT	ENSG00000005469	174	179	164	112	137	140	209	137	192	165	151	165
ABCB4	ENSG00000005471	14	13	34	9	5	5	4	9	5	9	9	15
KMT2E	ENSG00000005483	1615	1444	1602	1060	1272	1119	1584	2320	1857	1420	1679	1526
RHBDD2	ENSG00000005486	413	376	473	380	471	296	318	317	403	370	388	391
SOX8	ENSG00000005513	215	185	275	341	374	322	567	518	679	374	359	425
IBTK	ENSG00000005700	1342	1267	1065	574	802	788	1138	941	1242	1018	1003	1032
ZNF195	ENSG00000005801	690	558	526	537	584	532	739	690	822	655	611	627
MYCBP2	ENSG00000005810	1810	1648	1554	1412	1795	1796	2096	1682	1902	1773	1708	1751
FBXL3	ENSG00000005812	892	860	708	454	681	553	925	764	1007	757	768	756
ITGAL	ENSG00000005844	3	1	2	1	0	0	0	0	0	1	0	1
PDK2	ENSG00000005882	196	198	244	455	483	371	378	465	432	343	382	349
ITGA3	ENSG00000005884	885	765	918	128	127	124	100	85	133	371	326	392
ZFX	ENSG00000005889	551	523	519	428	443	452	595	569	665	525	512	545
LAMP2	ENSG00000005893	2046	1962	1800	1076	1536	1303	1765	1338	1863	1629	1612	1655
ITGA2B	ENSG00000005961	6	4	5	29	16	23	27	15	29	21	12	19
ASB4	ENSG00000005981	3	8	3	864	1018	921	1263	1317	1528	710	781	817
GDE1	ENSG00000006007	939	960	948	1081	1126	1008	1257	1180	1514	1092	1089	1157
REX1BD	ENSG00000006015	177	143	218	163	197	138	114	149	163	151	163	173
CRLF1	ENSG00000006016	103	102	121	58	97	74	58	61	88	73	87	94
OSBPL7	ENSG00000006025	109	81	129	197	197	211	116	99	143	141	126	161
TMEM98	ENSG00000006042	608	609	696	566	660	525	608	477	729	594	582	650
YBX2	ENSG00000006047	2	4	5	17	13	11	18	17	17	12	11	11
KRT33A	ENSG00000006059	0	0	0	0	0	0	0	0	0	0	0	0
MAP3K14	ENSG00000006062	536	478	528	153	180	149	142	118	151	277	259	276
ABCC8	ENSG00000006071	8	6	6	18	28	39	24	20	21	17	18	22
CACNG3	ENSG00000006116	1	2	0	0	1	0	0	1	2	0	1	1
TMEM132A	ENSG00000006118	715	599	702	2139	2165	1959	1260	1028	1427	1371	1264	1363
AP2B1	ENSG00000006125	7039	6784	6986	3564	4203	3733	4920	4584	5526	5174	5190	5415
TAC1	ENSG00000006128	42	57	46	57	86	57	86	68	90	62	70	64
ZNF263	ENSG00000006194	608	625	674	570	644	568	616	676	732	598	648	658
CX3CL1	ENSG00000006210	37	29	54	57	59	49	48	57	71	47	48	58
SPATA20	ENSG00000006282	244	229	275	506	550	516	319	287	434	356	355	408
CACNA1G	ENSG00000006283	63	51	67	413	482	405	372	338	467	283	290	313
TNFRSF12A	ENSG00000006327	1459	1483	1578	146	170	131	155	148	203	587	600	637
DLX6	ENSG00000006377	0	1	1	1	0	0	1	1	1	1	1	1
MAP3K9	ENSG00000006432	179	184	155	125	124	104	149	100	133	151	136	131
RALA	ENSG00000006451	1150	1087	1012	607	740	653	1088	1010	1268	948	946	978
BAIAP2L1	ENSG00000006453	227	214	225	44	51	62	82	74	78	118	113	122
KDM7A	ENSG00000006459	150	120	106	190	298	231	401	321	409	247	246	249
ETV1	ENSG00000006468	326	301	269	353	493	449	722	757	820	467	517	513
AGK	ENSG00000006530	696	733	710	416	425	365	508	491	582	540	550	552
ALDH3B1	ENSG00000006534	73	68	79	123	128	115	141	128	205	112	108	133
TTC22	ENSG00000006555	0	1	0	1	4	2	4	4	6	2	3	3
PHTF2	ENSG00000006576	843	805	622	313	508	378	633	538	649	596	617	550
CCL26	ENSG00000006606	2	0	0	0	3	1	3	1	2	2	1	1
FARP2	ENSG00000006607	1348	1271	1271	763	925	807	1159	882	1123	1090	1026	1067
USH1C	ENSG00000006611	6	6	12	1	8	5	4	5	2	4	6	6
GGCT	ENSG00000006625	790	852	740	355	368	296	494	598	640	546	606	559
DBF4	ENSG00000006634	867	787	724	138	189	155	295	380	376	433	452	418
TBXA2R	ENSG00000006638	21	13	17	9	12	8	7	10	6	12	12	10
IFRD1	ENSG00000006652	1067	1107	1053	282	374	304	487	404	545	612	628	634
LGALS14	ENSG00000006659	0	0	0	0	0	0	0	0	0	0	0	0
COX10	ENSG00000006695	278	238	259	190	230	181	266	272	282	245	247	241
GTF2IRD1	ENSG00000006704	521	480	517	498	535	455	496	480	595	505	498	522
PAF1	ENSG00000006712	1114	1133	1363	783	788	703	794	1203	966	897	1041	1011
VPS41	ENSG00000006715	827	785	748	720	830	779	1043	1008	1182	863	874	903
ARHGAP44	ENSG00000006740	62	58	74	127	139	135	108	108	134	99	102	114
ELAC2	ENSG00000006744	1703	1592	1865	910	948	878	762	817	970	1125	1119	1238
SCIN	ENSG00000006747	1	4	3	0	0	1	1	1	2	1	2	2
ARSD	ENSG00000006756	83	87	95	251	312	251	253	218	274	196	206	207
PNPLA4	ENSG00000006757	131	135	142	106	142	108	168	184	223	135	154	158
MYH13	ENSG00000006788	10	16	10	33	32	35	29	22	27	24	23	24
ADIPOR2	ENSG00000006831	1316	1310	1295	1053	1164	1010	1241	1009	1444	1203	1161	1250
CDKL3	ENSG00000006837	30	41	34	30	48	34	67	68	70	42	52	46
UPP2	ENSG00000007001	2	0	1	1	0	2	0	2	2	1	1	2
PRSS21	ENSG00000007038	0	0	0	0	0	0	0	0	0	0	0	0
MARK4	ENSG00000007047	685	621	769	755	823	669	832	946	1005	757	797	814
PROM1	ENSG00000007062	341	295	324	154	229	154	343	308	409	279	277	296
CCDC124	ENSG00000007080	1120	1075	1290	570	583	390	605	922	810	765	860	830
CEACAM21	ENSG00000007129	2	1	1	0	0	0	0	0	1	1	0	1
PAFAH1B1	ENSG00000007168	3825	3595	3417	2066	2509	2218	3420	2534	3476	3104	2879	3037
NOS2	ENSG00000007171	8	7	3	1	0	0	2	1	2	4	3	2
DNAH9	ENSG00000007174	11	8	17	66	84	84	83	102	113	53	65	71
KIAA0100	ENSG00000007202	4482	4037	4470	2981	3270	3062	3195	2763	3408	3553	3357	3647
SLC13A2	ENSG00000007216	0	0	0	0	0	0	0	0	0	0	0	0
GAS7	ENSG00000007237	437	438	532	1002	1075	984	1179	1190	1318	873	901	945
TRAPPC6A	ENSG00000007255	28	36	38	99	88	75	77	81	114	68	68	76
MATK	ENSG00000007264	3	4	0	6	7	3	8	6	9	6	6	4
CEACAM7	ENSG00000007306	0	0	0	0	0	0	0	0	0	0	0	0
CD79B	ENSG00000007312	4	2	1	22	22	14	11	10	11	12	11	9
SCN4A	ENSG00000007314	4	2	4	157	186	173	113	100	147	91	96	108
ST7L	ENSG00000007341	286	271	262	315	422	365	453	457	513	351	383	380
TKTL1	ENSG00000007350	11	17	23	151	180	145	268	250	305	143	149	158
PAX6	ENSG00000007372	59	57	57	110	128	111	261	352	276	143	179	148
RPUSD1	ENSG00000007376	354	314	386	212	204	168	146	170	204	237	229	253
RHBDF1	ENSG00000007384	371	286	392	625	695	603	392	373	482	463	451	492
LUC7L	ENSG00000007392	683	647	696	1287	1535	1278	1185	1135	1306	1052	1106	1093
CACNA2D2	ENSG00000007402	94	86	102	141	165	117	123	153	159	119	135	126
BAIAP3	ENSG00000007516	229	244	266	227	239	200	225	333	278	227	272	248
TSR3	ENSG00000007520	642	607	714	483	483	391	428	524	506	518	538	537
PIGQ	ENSG00000007541	318	285	406	374	348	324	239	201	282	310	278	337
CRAMP1	ENSG00000007545	573	424	491	670	771	641	676	504	690	640	566	607
TEAD3	ENSG00000007866	722	598	788	537	518	461	512	584	603	590	567	617
SELE	ENSG00000007908	0	0	1	0	0	0	0	0	0	0	0	0
DNAJC11	ENSG00000007923	1817	1588	1816	1027	1047	956	1093	1163	1261	1312	1266	1344
FMO3	ENSG00000007933	1	0	0	5	8	5	11	5	13	6	4	6
MYLIP	ENSG00000007944	63	45	50	274	316	252	343	282	335	227	214	212
NOX1	ENSG00000007952	5	2	3	0	3	0	8	10	14	4	5	6
E2F2	ENSG00000007968	367	348	340	109	138	103	155	170	175	210	219	206
PSMB1	ENSG00000008018	2347	2554	2467	1066	1199	987	1315	1314	1494	1576	1689	1649
SYN1	ENSG00000008056	104	99	115	76	53	52	67	83	71	82	78	79
JARID2	ENSG00000008083	655	549	601	664	741	645	855	854	966	725	715	737
CDKL5	ENSG00000008086	122	135	127	203	237	237	341	252	294	222	208	219
CAMK1G	ENSG00000008118	6	7	8	9	5	2	3	6	11	6	6	7
CDK11A	ENSG00000008128	182	181	221	222	254	257	181	230	196	195	222	225
NADK	ENSG00000008130	676	677	733	514	544	483	510	403	593	567	541	603
TFAP2B	ENSG00000008196	71	66	63	56	89	63	80	74	91	69	76	72
TFAP2D	ENSG00000008197	0	0	0	0	0	0	0	0	0	0	0	0
DLEC1	ENSG00000008226	139	121	138	172	172	134	144	167	212	152	153	161
CYTH3	ENSG00000008256	1594	1486	1568	1704	1865	1587	1571	1655	1833	1623	1669	1663
ADAM22	ENSG00000008277	112	90	112	110	152	135	209	191	212	144	144	153
SYPL1	ENSG00000008282	894	927	737	373	513	419	768	499	799	678	646	652
CYB561	ENSG00000008283	80	69	95	71	91	57	86	65	130	79	75	94
SPAG9	ENSG00000008294	2929	2597	2552	1816	2198	2078	2850	2319	3129	2532	2371	2586
CELSR3	ENSG00000008300	288	192	274	358	397	358	392	264	388	346	284	340
AASS	ENSG00000008311	292	234	263	711	811	814	757	650	770	587	565	616
PLEKHG6	ENSG00000008323	9	9	12	4	8	8	6	2	8	6	6	9
SS18L2	ENSG00000008324	198	232	204	83	116	115	156	119	191	146	156	170
MPND	ENSG00000008382	114	105	126	137	133	128	125	130	167	125	123	140
MGST1	ENSG00000008394	239	266	250	309	343	305	472	476	545	340	362	367
CRY1	ENSG00000008405	703	725	625	272	266	240	326	241	343	434	411	403
PGLYRP1	ENSG00000008438	0	1	0	2	2	2	2	1	2	1	1	1
NFIX	ENSG00000008441	1299	1173	1483	963	1146	944	1029	1182	1165	1097	1167	1197
ST3GAL1	ENSG00000008513	392	373	372	262	287	240	304	288	364	319	316	325
MMP25	ENSG00000008516	22	15	20	63	67	56	39	32	30	41	38	35
IL32	ENSG00000008517	299	318	351	256	233	200	518	632	641	358	394	397
PKD1	ENSG00000008710	700	586	712	1406	1430	1446	1004	683	986	1037	900	1048
MAPK8IP2	ENSG00000008735	157	158	169	183	209	178	183	189	216	174	185	188
MED24	ENSG00000008838	1262	1092	1295	967	978	877	798	717	997	1009	929	1056
RHOBTB2	ENSG00000008853	605	576	702	632	611	573	570	587	707	602	591	661
HEATR5B	ENSG00000008869	506	473	462	502	613	615	636	624	659	548	570	579
SEC62	ENSG00000008952	2173	2073	1964	1762	2039	1821	2438	2622	2952	2124	2245	2246
RPS20	ENSG00000008988	6995	7327	7395	6814	6897	5686	9692	8728	12598	7834	7651	8560
CSDE1	ENSG00000009307	14267	14230	13700	9788	11061	9834	15673	15410	18832	13243	13567	14122
UBE3C	ENSG00000009335	2441	2135	2058	932	1148	1001	1308	943	1424	1560	1409	1494
REV3L	ENSG00000009413	756	659	602	1133	1528	1634	2142	1926	2258	1344	1371	1498
TENM1	ENSG00000009694	42	41	35	144	260	256	363	335	349	183	212	213
PAX7	ENSG00000009709	465	438	546	182	214	188	596	677	662	414	443	465
MASP2	ENSG00000009724	50	37	44	100	135	124	94	155	144	81	109	104
IYD	ENSG00000009765	0	0	0	0	0	0	2	0	1	1	0	0
FAM76A	ENSG00000009780	164	153	158	195	210	172	298	240	319	219	201	216
TRAF3IP3	ENSG00000009790	38	34	40	18	22	14	22	18	32	26	25	29
POMT2	ENSG00000009830	489	461	499	559	559	462	456	404	513	501	475	491
VTA1	ENSG00000009844	1621	1505	1332	593	718	645	1166	1137	1434	1127	1120	1137
MLXIPL	ENSG00000009950	0	0	2	9	14	8	10	11	9	6	8	6
BAZ1B	ENSG00000009954	4715	4346	4519	2167	2407	2122	2678	3123	2987	3187	3292	3209
RANBP9	ENSG00000010017	1088	1036	978	578	673	571	854	801	938	840	837	829
ETV7	ENSG00000010030	0	0	3	5	3	5	4	4	7	3	2	5
SPRTN	ENSG00000010072	344	293	272	152	189	141	231	256	278	242	246	230
EEF1AKNMT	ENSG00000010165	838	780	818	384	362	358	414	325	473	545	489	550
DYRK4	ENSG00000010219	259	254	283	157	197	139	233	254	277	216	235	233
ZNF207	ENSG00000010244	4030	3724	3680	1989	2712	2391	3763	3383	3926	3261	3273	3332
UQCRC1	ENSG00000010256	1674	1703	1952	1543	1467	1301	1309	1340	1870	1509	1503	1708
STARD3NL	ENSG00000010270	963	1113	1009	696	800	642	918	772	1108	859	895	920
CD9	ENSG00000010278	352	296	362	256	277	198	322	261	393	310	278	318
HHATL	ENSG00000010282	2	2	0	150	127	139	93	86	119	82	72	86
NCAPD2	ENSG00000010292	4720	4524	4737	1228	1292	1142	1591	1452	1686	2513	2423	2522
IFFO1	ENSG00000010295	239	191	277	519	536	450	442	429	478	400	385	402
GIPR	ENSG00000010310	2	4	2	24	13	8	10	9	9	12	9	6
PHF7	ENSG00000010318	101	88	104	52	55	50	63	75	69	72	73	74
SEMA3G	ENSG00000010319	0	3	0	37	20	21	12	11	26	16	11	16
NISCH	ENSG00000010322	1212	1041	1196	2039	2278	1992	1792	1545	1982	1681	1621	1723
STAB1	ENSG00000010327	197	220	276	97	99	75	76	119	101	123	146	151
FUZ	ENSG00000010361	354	334	371	260	230	235	258	222	295	291	262	300
SLC6A13	ENSG00000010379	6	8	8	405	371	346	258	220	318	223	200	224
IDS	ENSG00000010404	1613	1505	1492	950	1149	1029	1501	1308	1511	1355	1321	1344
PRSS3	ENSG00000010438	3	1	1	5	5	2	1	1	2	3	2	2
ZNF200	ENSG00000010539	251	269	241	142	156	139	185	160	243	193	195	208
CD4	ENSG00000010610	8	8	13	11	23	22	64	44	56	28	25	30
LRRC23	ENSG00000010626	100	101	116	101	101	76	103	154	150	101	119	114
BTK	ENSG00000010671	2	3	2	2	4	1	3	5	2	2	4	2
HFE	ENSG00000010704	71	56	54	68	93	74	92	60	120	77	70	83
SCMH1	ENSG00000010803	566	500	612	468	488	444	548	637	687	527	542	581
FYN	ENSG00000010810	1228	1255	1310	1741	1833	1491	2092	2262	2573	1687	1783	1791
HIVEP2	ENSG00000010818	661	568	574	500	515	562	676	700	650	612	594	595
FMO1	ENSG00000010932	6	4	5	439	528	466	349	331	449	265	288	307
ELOA	ENSG00000011007	2364	2339	2391	1030	1158	995	1336	1282	1507	1577	1593	1631
LYPLA2	ENSG00000011009	554	465	600	475	460	363	417	416	548	482	447	504
CLCN6	ENSG00000011021	480	437	471	915	1056	907	833	776	935	743	756	771
MRC2	ENSG00000011028	2201	1897	2341	5277	5626	4964	3807	3115	4184	3762	3546	3830
NME1-NME2	ENSG00000011052	7367	7467	7645	3506	3507	2766	3997	3786	4932	4957	4920	5114
SLC6A7	ENSG00000011083	2	0	0	20	32	15	19	30	20	14	21	12
TSPAN9	ENSG00000011105	628	594	670	2275	2368	2151	1779	1480	2276	1561	1481	1699
BTBD7	ENSG00000011114	940	805	817	598	782	671	1020	742	1007	853	776	832
APBA3	ENSG00000011132	86	81	113	141	182	146	123	102	128	117	122	129
MKS1	ENSG00000011143	204	204	240	169	195	168	160	151	175	178	183	194
ABHD5	ENSG00000011198	241	220	187	55	71	57	81	59	91	126	117	112
ANOS1	ENSG00000011201	86	88	76	107	140	119	308	227	278	167	152	158
AKAP8L	ENSG00000011243	677	680	754	1207	1221	1110	913	1131	1111	932	1011	992
MBTD1	ENSG00000011258	352	296	256	447	529	464	823	783	894	541	536	538
UTP18	ENSG00000011260	1081	1156	1017	330	398	344	521	511	615	644	688	659
RNF216	ENSG00000011275	1097	1006	1145	861	944	780	923	896	1044	960	949	990
TTC19	ENSG00000011295	708	724	632	471	592	556	648	571	756	609	629	648
PTBP1	ENSG00000011304	9207	8247	9200	2726	3011	2451	2779	2895	3369	4904	4718	5007
DPF1	ENSG00000011332	205	227	269	215	208	174	223	227	232	214	221	225
SYT7	ENSG00000011347	39	32	43	226	260	243	261	251	251	175	181	179
LARS2	ENSG00000011376	645	627	583	442	547	470	467	419	534	518	531	529
PIK3C2A	ENSG00000011405	1283	1115	947	510	843	788	1298	1226	1367	1030	1061	1034
PLAUR	ENSG00000011422	2211	2174	2231	438	444	452	318	283	350	989	967	1011
ANLN	ENSG00000011426	6576	6248	6089	596	740	624	951	1161	1045	2708	2716	2586
WIZ	ENSG00000011451	1549	1349	1667	1093	1223	979	1040	1122	1231	1227	1231	1292
RABGAP1	ENSG00000011454	1379	1264	1220	1215	1369	1277	1565	1476	1696	1386	1370	1398
DCN	ENSG00000011465	4024	4133	4655	22935	26970	22588	21944	21150	26804	16301	17418	18016
QPCTL	ENSG00000011478	227	202	219	132	119	119	123	109	149	161	143	162
PPP5C	ENSG00000011485	2091	2005	2320	1208	1411	1142	1214	1135	1359	1504	1517	1607
CEP68	ENSG00000011523	412	373	371	472	623	506	811	760	928	565	585	602
MAP4K3	ENSG00000011566	666	585	566	354	496	388	748	643	764	589	575	573
ZBTB32	ENSG00000011590	3	1	1	4	3	4	3	3	3	3	2	3
TYROBP	ENSG00000011600	0	1	0	0	0	0	0	0	0	0	0	0
TMEM159	ENSG00000011638	125	125	121	307	334	277	379	219	430	270	226	276
GABRA3	ENSG00000011677	46	38	35	58	68	57	61	75	72	55	60	55
BRCA1	ENSG00000012048	1114	1096	1058	217	292	274	352	392	391	561	593	574
ERCC1	ENSG00000012061	2218	2109	2329	821	960	814	884	1003	1152	1308	1357	1432
CD22	ENSG00000012124	0	0	0	11	10	8	7	14	12	6	8	7
SEMA3B	ENSG00000012171	44	38	51	293	307	285	314	288	414	217	211	250
MBTPS2	ENSG00000012174	796	819	654	515	639	560	738	595	773	683	684	662
PRICKLE3	ENSG00000012211	39	42	62	67	49	43	31	56	62	46	49	56
LTF	ENSG00000012223	0	0	1	1	1	0	1	2	2	1	1	1
EXTL3	ENSG00000012232	1338	1216	1347	1486	1575	1411	1530	1131	1627	1451	1307	1462
NR1H4	ENSG00000012504	1	0	0	0	0	0	0	0	0	0	0	0
ELOVL5	ENSG00000012660	2293	2187	2028	1565	1811	1538	2183	1951	2590	2014	1983	2052
ALOX5	ENSG00000012779	2	0	0	0	1	2	1	0	1	1	0	1
KDM5D	ENSG00000012817	449	376	356	876	1002	870	874	795	917	733	724	714
CALCOCO1	ENSG00000012822	359	320	390	1108	1224	1031	913	1161	1073	793	902	831
UBR7	ENSG00000012963	1486	1492	1372	503	559	453	728	704	766	906	918	864
MAP4K5	ENSG00000012983	1248	1069	993	554	699	662	980	1005	1075	927	924	910
EHD3	ENSG00000013016	239	252	247	237	216	203	229	204	221	235	224	224
PSMC4	ENSG00000013275	2035	2055	2113	1032	951	847	953	1122	1213	1340	1376	1391
MAN2B2	ENSG00000013288	461	450	525	748	936	770	610	597	727	606	661	674
SLC7A14	ENSG00000013293	118	118	88	56	60	53	107	75	97	94	84	79
CLDN11	ENSG00000013297	3024	2931	3124	2171	2425	2125	2236	2025	2634	2477	2460	2628
SLC25A39	ENSG00000013306	1092	1176	1259	779	730	610	569	612	813	813	839	894
MVP	ENSG00000013364	1501	1337	1617	1107	1068	871	697	563	862	1102	989	1117
NUB1	ENSG00000013374	921	923	953	588	804	656	868	1010	937	792	912	849
PGM3	ENSG00000013375	1743	1660	1538	1063	1319	1234	1524	1439	1755	1443	1473	1509
RWDD2A	ENSG00000013392	101	83	91	145	171	143	196	160	218	147	138	151
CLK1	ENSG00000013441	594	527	537	1023	1370	1188	1446	1224	1614	1021	1040	1113
POLR3B	ENSG00000013503	548	549	589	395	401	392	420	484	493	454	478	491
ANGEL1	ENSG00000013523	164	164	196	311	443	392	331	333	352	269	313	313
RNF14	ENSG00000013561	907	846	757	456	576	525	753	693	874	705	705	719
DNASE1L1	ENSG00000013563	293	292	281	187	167	113	122	144	171	201	201	188
DDX11	ENSG00000013573	499	458	517	334	378	348	279	289	311	371	375	392
HEBP1	ENSG00000013583	304	250	307	302	356	293	360	316	467	322	307	356
GPRC5A	ENSG00000013588	569	477	563	58	65	55	46	37	68	224	193	229
MAMLD1	ENSG00000013619	300	273	280	460	603	551	630	573	654	463	483	495
CD6	ENSG00000013725	6	1	4	9	4	7	3	2	6	6	2	6
TACC3	ENSG00000013810	3438	3279	3408	621	637	522	682	759	844	1580	1558	1591
UFL1	ENSG00000014123	817	829	732	469	652	538	917	883	1056	734	788	775
POLA2	ENSG00000014138	984	1041	1131	585	557	500	786	711	932	785	770	854
ZC3H3	ENSG00000014164	394	314	381	265	297	199	228	243	270	296	285	283
CAPN1	ENSG00000014216	1325	1257	1473	1611	1583	1372	1450	1383	1788	1462	1408	1544
ACP3	ENSG00000014257	5	3	4	20	15	14	18	21	16	14	13	11
MDH1	ENSG00000014641	1923	2031	1914	2041	2141	1905	2596	2001	3198	2187	2058	2339
SLC30A9	ENSG00000014824	1389	1321	1195	735	910	837	1693	1663	1865	1272	1298	1299
MTMR11	ENSG00000014914	143	140	131	515	558	560	223	163	211	294	287	301
COX15	ENSG00000014919	687	629	616	586	582	549	775	643	820	683	618	662
CCDC88C	ENSG00000015133	210	204	197	247	306	282	324	342	339	260	284	273
YAF2	ENSG00000015153	199	148	161	145	162	141	349	355	386	231	222	229
ZMYND11	ENSG00000015171	1508	1345	1332	731	924	827	1275	1481	1479	1171	1250	1213
WAS	ENSG00000015285	9	7	8	11	9	11	7	15	13	9	10	11
DPEP1	ENSG00000015413	0	0	0	0	1	1	2	2	2	1	1	1
BID	ENSG00000015475	336	311	324	432	398	325	432	449	548	400	386	399
MATR3	ENSG00000015479	7389	7246	6932	5369	6143	5734	8682	8695	10038	7147	7361	7568
NPC1L1	ENSG00000015520	0	4	3	0	0	0	0	2	0	0	2	1
XYLT2	ENSG00000015532	501	403	561	614	667	529	517	461	600	544	510	563
RGPD5	ENSG00000015568	0	1	0	0	0	0	1	1	1	0	1	0
STMN4	ENSG00000015592	239	238	232	267	282	250	301	311	372	269	277	285
NUDCD3	ENSG00000015676	1308	1233	1318	941	1026	869	1023	867	1165	1091	1042	1117
ISL1	ENSG00000016082	10	3	5	4	6	8	6	8	8	7	6	7
CHDH	ENSG00000016391	60	57	57	20	44	38	39	39	56	40	47	50
IL20RA	ENSG00000016402	27	34	26	111	122	93	154	126	198	97	94	106
CLCA1	ENSG00000016490	1	0	0	0	0	0	0	0	0	0	0	0
CLCA4	ENSG00000016602	0	0	0	0	0	0	0	0	0	0	0	0
GLT8D1	ENSG00000016864	841	857	848	834	933	836	911	781	1021	862	857	902
ATP2C1	ENSG00000017260	1491	1370	1334	1237	1450	1322	1598	1319	1677	1442	1380	1444
IGF1	ENSG00000017427	5	5	10	470	644	610	1065	1153	1116	513	601	579
SLC38A5	ENSG00000017483	300	294	351	41	34	26	29	24	44	123	117	140
RALBP1	ENSG00000017797	1288	1181	1316	939	1036	878	1186	1293	1413	1138	1170	1202
RUFY3	ENSG00000018189	916	813	755	900	1255	1145	1633	1382	1684	1150	1150	1195
CNTN1	ENSG00000018236	626	576	489	159	195	196	231	205	234	339	325	306
SLC11A1	ENSG00000018280	4	3	3	4	3	4	8	3	6	5	3	4
WWTR1	ENSG00000018408	2863	2492	2471	6297	7604	6646	8309	6718	8664	5823	5605	5927
AGPS	ENSG00000018510	1588	1585	1392	594	812	669	1225	1019	1298	1136	1139	1120
ZNF806	ENSG00000018607	0	0	0	0	0	3	0	4	0	0	1	1
STEEP1	ENSG00000018610	340	345	332	187	173	147	179	195	239	235	238	239
ATP1A2	ENSG00000018625	162	164	220	13931	15609	13667	13076	12429	14702	9056	9401	9530
TTC27	ENSG00000018699	752	740	649	296	323	303	353	365	440	467	476	464
ZNF582	ENSG00000018869	48	47	48	56	62	57	69	49	95	58	53	67
VSIG2	ENSG00000019102	3	1	2	0	1	1	1	3	1	1	2	1
PHLDB1	ENSG00000019144	2073	1856	2253	3421	3775	3459	2911	2996	3361	2802	2876	3024
MARCO	ENSG00000019169	2	1	2	3	7	5	2	7	4	2	5	4
CYP24A1	ENSG00000019186	9	8	19	2	4	1	4	1	1	5	4	7
PRDM11	ENSG00000019485	233	209	241	746	893	849	1024	876	1104	668	659	731
SYT13	ENSG00000019505	278	240	239	216	255	231	369	257	383	288	251	284
SNAI2	ENSG00000019549	1963	1873	2001	760	879	762	916	1290	1106	1213	1347	1290
CD74	ENSG00000019582	6	10	16	2	14	9	7	18	11	5	14	12
HGF	ENSG00000019991	41	35	29	11	5	6	13	6	7	22	15	14
ZRANB1	ENSG00000019995	862	768	736	580	690	614	958	967	1043	800	808	798
NCDN	ENSG00000020129	582	490	574	712	705	618	531	465	616	608	553	603
ADGRA2	ENSG00000020181	927	904	1067	3234	3687	3090	2611	3037	3339	2257	2543	2499
CCT8L1P	ENSG00000020219	0	0	1	0	0	0	1	0	1	0	0	1
ZFP64	ENSG00000020256	336	312	349	236	329	219	271	356	329	281	332	299
MNAT1	ENSG00000020426	640	573	611	181	263	183	346	388	392	389	408	395
SAMD4A	ENSG00000020577	1472	1247	1276	889	1043	1034	1318	1055	1353	1226	1115	1221
RUNX3	ENSG00000020633	2	2	5	0	0	1	0	2	2	1	1	3
MRE11	ENSG00000020922	657	662	612	231	283	300	436	399	483	441	448	465
PLEKHB1	ENSG00000021300	7	8	12	20	31	17	38	54	52	22	31	27
SERPINB1	ENSG00000021355	93	80	110	164	205	169	218	188	262	158	158	180
CYP3A43	ENSG00000021461	0	0	0	1	0	0	1	2	0	1	1	0
SLC7A9	ENSG00000021488	4	2	2	6	9	7	12	9	5	7	7	5
SPAST	ENSG00000021574	446	415	327	318	415	361	618	498	585	461	443	424
NRXN3	ENSG00000021645	324	264	310	173	200	195	210	216	277	236	227	261
OSBPL5	ENSG00000021762	420	366	453	343	365	325	302	306	360	355	346	379
AQR	ENSG00000021776	1588	1489	1429	790	1012	895	1295	1196	1407	1224	1232	1244
CPS1	ENSG00000021826	233	199	194	292	331	299	471	364	483	332	298	325
C8B	ENSG00000021852	0	0	0	0	0	0	0	0	0	0	0	0
FHL1	ENSG00000022267	1760	1719	1844	2158	2319	1957	2066	1895	2498	1995	1978	2100
RTF2	ENSG00000022277	1459	1477	1455	1109	1039	872	1331	1395	1598	1300	1304	1308
GABRA1	ENSG00000022355	1	0	1	1	0	0	0	0	1	1	0	1
NLRP2	ENSG00000022556	0	0	0	0	0	0	0	0	0	0	0	0
SLC45A4	ENSG00000022567	123	107	124	133	158	129	118	95	134	125	120	129
RNF10	ENSG00000022840	2150	2044	2236	1664	1723	1505	1833	1751	2181	1882	1839	1974
ZNF839	ENSG00000022976	261	256	272	178	174	158	147	166	221	195	199	217
ZDHHC6	ENSG00000023041	581	588	566	478	562	497	624	646	650	561	599	571
GRAMD1B	ENSG00000023171	77	84	87	476	552	478	477	414	497	343	350	354
RNH1	ENSG00000023191	1818	1717	2116	1101	1067	909	812	762	1129	1244	1182	1385
NDUFS1	ENSG00000023228	2532	2460	2507	1913	2137	1869	2542	2406	2797	2329	2334	2391
RB1CC1	ENSG00000023287	1036	907	801	457	609	614	996	1007	1077	830	841	831
ERP44	ENSG00000023318	1074	1115	1052	734	975	720	856	1013	1009	888	1034	927
ALAS1	ENSG00000023330	671	665	743	681	665	547	666	656	791	673	662	694
BIRC3	ENSG00000023445	26	22	19	5	2	1	11	15	12	14	13	11
AKAP11	ENSG00000023516	1301	1213	1066	965	1278	1307	1783	1420	1722	1350	1304	1365
GLRX2	ENSG00000023572	232	197	185	63	77	68	138	110	165	144	128	139
SNAPC1	ENSG00000023608	631	595	531	108	143	128	258	259	250	332	332	303
DERA	ENSG00000023697	435	510	413	170	179	149	264	242	294	290	310	285
STRAP	ENSG00000023734	4968	4909	4592	1636	1844	1573	2431	2294	2742	3012	3016	2969
ABCC2	ENSG00000023839	26	31	28	26	34	36	57	45	50	36	37	38
DEF6	ENSG00000023892	25	20	30	30	29	17	19	17	26	25	22	24
PLEKHO1	ENSG00000023902	1164	1058	1243	777	766	661	710	689	957	884	838	954
GCLM	ENSG00000023909	564	538	463	86	99	99	174	119	187	275	252	250
UBR2	ENSG00000024048	734	693	633	640	837	817	1059	852	1036	811	794	829
EHD2	ENSG00000024422	4051	3461	4276	2886	3266	2648	2569	3665	3346	3169	3464	3423
DEPDC1	ENSG00000024526	1136	1067	819	93	152	116	312	279	333	514	499	423
CCDC28A	ENSG00000024862	74	83	86	33	35	25	35	42	40	47	53	50
RRAGD	ENSG00000025039	444	379	401	702	842	690	1308	1149	1421	818	790	837
HSF2	ENSG00000025156	350	334	359	335	363	290	505	468	643	397	388	431
PHF20	ENSG00000025293	1175	1189	1103	694	800	752	956	846	1113	942	945	989
HSD17B6	ENSG00000025423	44	37	40	4	14	4	6	4	9	18	18	18
NR1H3	ENSG00000025434	91	76	92	352	343	326	224	213	276	222	211	231
TYMP	ENSG00000025708	27	28	35	57	61	54	22	29	55	35	39	48
NCAPH2	ENSG00000025770	932	899	987	390	401	362	388	237	439	570	512	596
TOMM34	ENSG00000025772	668	667	663	257	284	215	333	369	386	419	440	421
SEC63	ENSG00000025796	2379	2274	2254	1532	1916	1720	2361	2614	2727	2091	2268	2234
KPNA6	ENSG00000025800	2821	2819	2711	1499	1641	1413	1771	1557	1949	2030	2006	2024
VIM	ENSG00000026025	98017	93853	96599	39955	43545	36944	48628	54567	60784	62200	63988	64776
RTEL1-TNFRSF6B	ENSG00000026036	647	533	630	387	343	369	271	220	306	435	365	435
FAS	ENSG00000026103	315	280	290	190	242	207	217	185	281	241	236	259
RNASET2	ENSG00000026297	60	57	67	199	238	175	354	332	478	204	209	240
CD44	ENSG00000026508	7386	6877	6759	539	685	574	781	792	962	2902	2785	2765
KCNG1	ENSG00000026559	558	511	540	86	95	66	75	69	78	240	225	228
AGPAT4	ENSG00000026652	359	325	298	621	756	637	829	732	865	603	604	600
SLAMF7	ENSG00000026751	0	1	0	0	0	0	0	0	0	0	0	0
BTN3A1	ENSG00000026950	75	64	60	209	241	164	198	205	223	161	170	149
MIPEP	ENSG00000027001	295	332	300	153	182	161	219	192	251	222	235	237
PRKCH	ENSG00000027075	157	135	119	34	42	36	26	20	44	72	66	66
INSRR	ENSG00000027644	0	1	3	6	6	11	4	3	4	3	3	6
IFNGR1	ENSG00000027697	565	536	482	554	756	661	712	654	833	610	649	659
B4GALT7	ENSG00000027847	267	221	268	214	198	209	169	139	210	217	186	229
SH2D2A	ENSG00000027869	6	6	3	0	1	1	0	0	1	2	2	2
VRK2	ENSG00000028116	548	527	456	143	229	203	266	274	301	319	343	320
TNFRSF1B	ENSG00000028137	24	16	30	456	455	406	402	399	441	294	290	292
VEZT	ENSG00000028203	1163	1101	1133	1043	1349	1176	1619	1661	1801	1275	1370	1370
POU2F2	ENSG00000028277	141	155	154	88	96	86	90	115	90	106	122	110
BRD9	ENSG00000028310	1170	1088	1124	773	816	669	679	744	849	874	883	881
SNX1	ENSG00000028528	1265	1171	1181	1203	1427	1231	1546	1458	1679	1338	1352	1364
TBPL1	ENSG00000028839	386	414	334	165	206	185	288	236	317	280	285	279
ARNTL2	ENSG00000029153	451	450	362	33	55	46	61	70	70	182	192	159
BCLAF1	ENSG00000029363	3104	2875	2493	1495	2069	1799	3258	3481	3678	2619	2808	2657
SLC39A9	ENSG00000029364	1388	1369	1301	963	1198	1045	1200	1088	1381	1184	1218	1242
ANK1	ENSG00000029534	179	158	199	821	986	764	1049	1352	1254	683	832	739
IBSP	ENSG00000029559	0	0	0	0	0	0	0	0	0	0	0	0
TFB1M	ENSG00000029639	160	177	147	67	76	74	101	76	136	109	110	119
RABEP1	ENSG00000029725	1998	1904	1834	1273	1576	1411	2180	2207	2562	1817	1896	1936
HMGB3	ENSG00000029993	2013	2155	2055	670	775	614	1027	1141	1171	1237	1357	1280
NUP160	ENSG00000030066	1774	1679	1665	836	1125	1080	1441	1117	1487	1350	1307	1411
BAK1	ENSG00000030110	233	221	277	132	132	105	147	141	202	171	165	195
MUSK	ENSG00000030304	123	113	115	349	495	448	389	338	366	287	315	310
IKZF2	ENSG00000030419	259	198	167	113	159	159	311	203	249	228	187	192
GRN	ENSG00000030582	856	746	897	1325	1341	1083	750	806	1006	977	964	995
FAM13B	ENSG00000031003	455	445	369	610	894	754	1007	984	1167	691	774	763
ARHGAP31	ENSG00000031081	822	747	822	455	563	461	638	603	673	638	638	652
CENPQ	ENSG00000031691	145	137	125	28	36	33	57	69	71	77	81	76
SARS1	ENSG00000031698	3536	3588	3922	1993	2041	1771	1967	2531	2430	2499	2720	2708
RANBP3	ENSG00000031823	1041	1008	1163	763	792	609	751	774	929	852	858	900
ARID4A	ENSG00000032219	276	267	269	394	485	424	611	784	732	427	512	475
EIPR1	ENSG00000032389	381	359	378	193	192	167	303	221	338	292	257	294
PNPLA6	ENSG00000032444	341	319	383	427	414	347	213	227	283	327	320	338
IFT88	ENSG00000032742	317	332	276	181	212	229	358	326	446	285	290	317
ALG1	ENSG00000033011	454	444	510	329	308	275	228	261	335	337	338	373
ZCCHC8	ENSG00000033030	401	416	409	255	362	271	361	418	478	339	399	386
ABCF2	ENSG00000033050	2639	2653	2758	1057	1070	997	1058	1022	1247	1585	1582	1667
CHPF2	ENSG00000033100	779	644	719	1218	1213	1026	798	533	904	932	797	883
LRRC7	ENSG00000033122	126	118	89	87	119	129	191	159	190	135	132	136
FUT8	ENSG00000033170	426	430	458	300	390	299	423	392	489	383	404	415
UBA6	ENSG00000033178	1540	1378	1125	414	659	610	1010	830	985	988	956	907
GAB2	ENSG00000033327	363	328	341	417	407	430	475	559	510	418	431	427
ATP6V0A1	ENSG00000033627	924	876	912	1193	1355	1291	1058	973	1184	1058	1068	1129
PIAS1	ENSG00000033800	783	741	743	1190	1540	1415	1917	2060	2026	1297	1447	1395
SLC4A7	ENSG00000033867	1208	1117	857	386	546	521	738	549	782	777	737	720
APBA2	ENSG00000034053	496	484	541	503	526	407	506	526	598	502	512	515
MAP2K3	ENSG00000034152	617	546	559	206	184	161	171	147	243	331	292	321
EFCAB1	ENSG00000034239	12	7	6	4	5	12	19	19	19	12	10	12
TMSB10	ENSG00000034510	25625	27462	29820	9659	9724	7779	11536	13755	15432	15607	16980	17677
ASTE1	ENSG00000034533	142	100	132	103	118	78	97	122	116	114	113	109
RNF19A	ENSG00000034677	562	513	472	405	594	472	930	936	1128	632	681	691
PEX3	ENSG00000034693	312	323	329	113	135	91	195	181	190	207	213	203
GABARAPL2	ENSG00000034713	626	632	583	683	790	622	941	791	1206	750	738	804
MYOC	ENSG00000034971	0	0	0	4	0	1	0	0	0	1	0	0
SH3YL1	ENSG00000035115	196	178	192	323	416	318	521	417	567	347	337	359
FAM136A	ENSG00000035141	902	967	892	399	450	422	572	631	725	624	683	680
VCL	ENSG00000035403	12933	11908	12150	5010	5995	5284	4990	4846	5650	7644	7583	7695
DEPDC1B	ENSG00000035499	359	334	381	90	127	83	165	157	158	205	206	207
DAPK2	ENSG00000035664	31	19	19	31	37	30	31	44	43	31	33	31
NSMAF	ENSG00000035681	909	892	845	396	459	431	566	571	585	624	641	620
ADSS2	ENSG00000035687	1073	1057	928	299	377	340	483	512	520	618	649	596
STAP1	ENSG00000035720	1	0	0	0	1	0	0	0	1	0	0	0
TIMP2	ENSG00000035862	5480	4991	5586	4091	4476	3836	3697	3407	4328	4423	4291	4583
RFC1	ENSG00000035928	1791	1743	1651	717	834	813	1172	1360	1405	1227	1312	1290
TBC1D23	ENSG00000036054	570	511	427	366	523	437	692	614	821	543	549	562
CUL3	ENSG00000036257	2345	2332	2156	1253	1464	1353	1936	2073	2327	1845	1956	1945
MYOM2	ENSG00000036448	49	36	45	2685	2630	2523	1938	1729	2211	1557	1465	1593
OTC	ENSG00000036473	0	0	2	0	1	0	0	0	0	0	0	1
CYP46A1	ENSG00000036530	20	11	22	85	112	95	130	123	132	78	82	83
ZZZ3	ENSG00000036549	1003	1045	900	496	712	607	889	993	1130	796	917	879
SLC18A1	ENSG00000036565	16	8	9	59	59	42	25	29	34	33	32	28
USP2	ENSG00000036672	193	156	216	311	328	289	373	378	411	292	287	305
CASR	ENSG00000036828	0	0	0	0	0	0	0	0	1	0	0	0
TUBG2	ENSG00000037042	152	122	124	257	287	219	179	192	203	196	200	182
RPL26L1	ENSG00000037241	363	396	369	230	225	166	303	448	400	299	356	312
FLT4	ENSG00000037280	17	15	18	5	3	3	10	11	8	11	10	10
NSUN2	ENSG00000037474	2311	2237	2074	873	1030	942	1093	940	1139	1426	1402	1385
FBXO42	ENSG00000037637	432	452	518	449	449	392	550	418	625	477	440	512
MFAP3	ENSG00000037749	424	417	398	290	456	427	590	397	586	435	423	470
MRI1	ENSG00000037757	296	278	331	360	430	317	304	312	334	320	340	327
METTL1	ENSG00000037897	290	320	334	166	166	123	160	162	172	205	216	210
HOXC8	ENSG00000037965	544	548	591	250	243	205	292	410	347	362	400	381
AGA	ENSG00000038002	104	88	92	33	51	47	67	62	87	68	67	75
PI4K2B	ENSG00000038210	447	448	361	146	214	150	320	279	377	304	314	296
BOD1L1	ENSG00000038219	2049	1746	1887	1398	1547	1683	1527	1877	1887	1658	1723	1819
MAT2B	ENSG00000038274	587	564	471	322	363	296	574	410	698	494	446	488
TLL1	ENSG00000038295	33	23	38	7	5	8	7	3	7	16	10	18
EDC4	ENSG00000038358	1180	1138	1194	944	936	871	905	762	931	1010	945	999
TRIO	ENSG00000038382	5347	4577	4709	5238	5972	5813	4872	3731	4873	5152	4760	5132
VCAN	ENSG00000038427	10617	9047	9116	5460	7320	7167	7856	7548	8090	7978	7972	8124
CLEC16A	ENSG00000038532	553	514	573	650	774	695	784	774	815	662	687	694
MSR1	ENSG00000038945	5	3	3	0	2	1	2	7	6	2	4	3
CDH1	ENSG00000039068	5	3	6	74	94	74	98	68	93	59	55	58
MTREX	ENSG00000039123	2266	2214	1909	1218	1541	1342	1947	2016	2272	1810	1924	1841
DNAH5	ENSG00000039139	23	21	10	5	8	5	14	12	8	14	14	8
ZFYVE16	ENSG00000039319	783	769	615	536	802	778	1207	987	1210	842	853	868
RIPOR1	ENSG00000039523	1324	1233	1418	802	855	711	696	915	836	941	1001	988
C6	ENSG00000039537	2	0	0	147	169	152	198	207	289	116	125	147
RAI14	ENSG00000039560	5908	5554	5532	1174	1361	1243	1648	1750	1875	2910	2888	2883
SOX30	ENSG00000039600	4	2	6	3	6	4	3	6	5	3	5	5
PNKP	ENSG00000039650	424	346	373	290	295	234	236	197	253	317	279	287
BEST2	ENSG00000039987	1	2	1	2	5	1	0	0	3	1	2	2
PHLPP2	ENSG00000040199	677	560	531	428	562	522	693	563	678	599	562	577
SPDL1	ENSG00000040275	2076	2000	1915	213	336	278	456	423	461	915	920	885
STAU2	ENSG00000040341	630	586	627	591	746	610	1024	1119	1219	748	817	819
SLC66A1	ENSG00000040487	288	254	324	245	226	185	140	150	153	224	210	221
CTNS	ENSG00000040531	200	181	221	230	247	260	171	180	213	200	203	231
RTN4R	ENSG00000040608	47	53	66	29	39	25	30	31	38	35	41	43
PHF23	ENSG00000040633	862	868	993	700	752	608	764	820	966	775	813	856
CDH10	ENSG00000040731	33	33	46	28	44	36	53	61	55	38	46	46
INPP4A	ENSG00000040933	520	482	504	360	507	396	560	398	557	480	462	486
RAB27B	ENSG00000041353	57	34	30	9	13	17	56	28	34	41	25	27
PSMA4	ENSG00000041357	2308	2472	2316	1189	1416	1090	1761	1850	2072	1753	1913	1826
MYO16	ENSG00000041515	53	50	32	231	254	225	375	409	387	220	238	215
LSG1	ENSG00000041802	1209	1144	1129	586	613	568	652	601	749	816	786	815
PARP3	ENSG00000041880	77	84	93	70	71	60	73	70	68	73	75	74
TNC	ENSG00000041982	8868	7744	8807	1379	1815	1555	1780	1554	1957	4009	3704	4106
THAP3	ENSG00000041988	747	660	734	516	475	388	504	457	644	589	531	589
RIPOR3	ENSG00000042062	21	14	23	169	163	143	136	89	150	109	89	105
TDP1	ENSG00000042088	724	658	743	213	234	181	333	319	381	423	404	435
AIFM2	ENSG00000042286	275	269	266	148	126	130	138	116	140	187	170	179
C2orf83	ENSG00000042304	0	0	0	0	0	0	0	0	0	0	0	0
SPATA7	ENSG00000042317	125	125	121	192	253	194	321	353	400	213	244	238
MED17	ENSG00000042429	740	681	644	403	484	425	586	510	655	576	558	575
RETSAT	ENSG00000042445	319	285	351	424	422	377	334	256	364	359	321	364
CAPG	ENSG00000042493	855	745	948	214	234	199	184	176	231	418	385	459
AP2S1	ENSG00000042753	2151	2209	2311	841	738	640	765	624	967	1252	1190	1306
USH2A	ENSG00000042781	0	3	1	2	5	3	3	3	4	2	4	3
ZPBP	ENSG00000042813	0	1	0	0	0	0	1	0	0	0	0	0
TG	ENSG00000042832	50	30	38	25	14	18	21	8	22	32	17	26
ADAM28	ENSG00000042980	1	1	4	12	23	17	61	62	59	25	29	27
BARX2	ENSG00000043039	49	31	44	73	72	67	33	44	50	52	49	54
DCUN1D1	ENSG00000043093	535	462	417	186	314	282	577	515	685	433	430	461
JADE2	ENSG00000043143	278	249	282	150	143	163	125	156	184	184	183	210
ZIC2	ENSG00000043355	716	666	770	930	1052	821	869	933	1091	838	884	894
LCP2	ENSG00000043462	12	5	7	12	11	13	21	19	14	15	12	11
TRIT1	ENSG00000043514	395	379	392	248	267	207	360	268	377	334	305	325
ADRB1	ENSG00000043591	0	3	0	0	0	1	2	2	1	1	2	1
GUCA2B	ENSG00000044012	0	0	0	0	0	0	0	0	0	0	0	0
CUL7	ENSG00000044090	691	667	761	1616	1559	1515	1337	1177	1590	1215	1134	1289
CTNNA1	ENSG00000044115	7392	7357	7657	5874	6168	5396	6558	6118	7682	6608	6548	6912
PHKA2	ENSG00000044446	330	321	330	530	538	520	526	420	584	462	426	478
CNTLN	ENSG00000044459	344	363	345	188	269	214	300	436	347	277	356	302
EPHA3	ENSG00000044524	678	633	599	827	1156	1020	1324	1046	1410	943	945	1010
HSPA5	ENSG00000044574	18486	18351	19529	9858	11006	9580	8454	8158	10252	12266	12505	13120
DSG2	ENSG00000046604	853	779	752	106	137	115	124	112	142	361	343	336
GEMIN8	ENSG00000046647	84	86	69	112	149	126	118	108	178	105	114	124
OFD1	ENSG00000046651	331	322	309	296	359	344	423	481	519	350	387	391
GPM6B	ENSG00000046653	1357	1240	1149	1257	1782	1363	2737	2422	3141	1784	1815	1884
MAGEC2	ENSG00000046774	0	0	0	0	0	0	0	0	0	0	0	0
PREX2	ENSG00000046889	101	73	100	114	205	169	322	288	290	179	189	186
WDR37	ENSG00000047056	487	482	457	385	405	371	473	339	455	448	409	428
YTHDC2	ENSG00000047188	614	594	535	395	492	487	680	561	676	563	549	566
CTPS2	ENSG00000047230	438	453	469	383	400	390	521	532	621	447	462	493
ATP6V1H	ENSG00000047249	552	611	514	360	394	332	369	274	440	427	426	429
POLR2B	ENSG00000047315	3579	3801	3409	2207	2483	2252	3196	2913	3689	2994	3066	3117
FAM214A	ENSG00000047346	150	146	112	232	346	300	440	363	416	274	285	276
ARAP2	ENSG00000047365	44	40	26	7	14	9	28	18	28	26	24	21
TPR	ENSG00000047410	4037	3591	3803	2770	3129	3217	3417	4151	3911	3408	3624	3644
CP	ENSG00000047457	58	57	57	29	47	55	98	57	95	62	54	69
KATNIP	ENSG00000047578	353	325	370	363	425	403	451	365	498	389	372	424
DTNBP1	ENSG00000047579	145	132	174	118	114	92	119	162	141	127	136	136
XK	ENSG00000047597	8	4	6	26	30	27	40	31	41	25	22	25
ANO2	ENSG00000047617	10	8	9	38	38	33	43	31	40	30	26	27
C12orf4	ENSG00000047621	821	849	773	261	397	338	469	443	557	517	563	556
SCML1	ENSG00000047634	298	278	279	183	263	205	395	325	397	292	289	294
WWC3	ENSG00000047644	610	567	557	505	551	471	485	517	576	533	545	535
ARHGAP6	ENSG00000047648	61	43	47	265	313	298	438	462	500	255	273	282
FAM184B	ENSG00000047662	183	143	177	330	419	397	394	331	442	302	298	339
MAP4	ENSG00000047849	9095	8893	9495	7664	8067	7674	7794	8202	8699	8184	8387	8623
GOPC	ENSG00000047932	881	746	656	729	984	851	1305	1152	1375	972	961	961
ROS1	ENSG00000047936	1	2	3	0	0	6	2	7	4	1	3	4
USP28	ENSG00000048028	622	585	614	577	682	636	882	713	972	694	660	741
HDAC9	ENSG00000048052	483	458	369	146	284	225	402	346	412	344	363	335
TSPAN17	ENSG00000048140	731	689	756	478	506	416	445	361	498	551	519	557
NOP16	ENSG00000048162	1054	1119	1105	721	787	592	864	760	996	880	889	898
CC2D2A	ENSG00000048342	348	333	342	364	433	395	502	516	556	405	427	431
RRM2B	ENSG00000048392	457	467	381	320	502	367	674	487	707	484	485	485
ZNF800	ENSG00000048405	418	403	304	215	309	262	424	419	392	352	377	319
TNFRSF17	ENSG00000048462	3	0	0	1	1	2	4	2	2	3	1	1
SNX29	ENSG00000048471	355	286	314	281	340	317	381	336	417	339	321	349
LMO3	ENSG00000048540	37	32	25	30	47	43	129	111	128	65	63	65
MRPS10	ENSG00000048544	846	817	790	340	407	339	516	535	669	567	586	599
GUCA1A	ENSG00000048545	2	3	2	1	0	4	1	1	2	1	1	3
RSF1	ENSG00000048649	1326	1225	1267	929	1232	1136	1635	1733	1890	1297	1397	1431
VPS13D	ENSG00000048707	945	873	856	779	981	934	1121	879	1086	948	911	959
CELF2	ENSG00000048740	1678	1559	1484	1565	2137	1700	2806	2644	2932	2016	2113	2039
FAM120A	ENSG00000048828	2685	2402	2488	1194	1525	1319	1722	1680	1977	1867	1869	1928
R3HDM1	ENSG00000048991	1215	1119	1155	812	1045	893	1182	1516	1333	1070	1227	1127
COL9A2	ENSG00000049089	65	78	75	79	81	66	63	81	72	69	80	71
KITLG	ENSG00000049130	958	849	614	220	377	305	736	487	711	638	571	543
ERCC8	ENSG00000049167	293	301	241	144	179	146	241	219	309	226	233	232
ADAMTS6	ENSG00000049192	333	328	283	33	32	26	21	19	27	129	126	112
H6PD	ENSG00000049239	580	549	614	1755	1887	1727	1627	1228	1775	1321	1221	1372
VAMP3	ENSG00000049245	1647	1595	1434	800	1022	824	1318	1196	1564	1255	1271	1274
PER3	ENSG00000049246	89	86	102	40	48	43	69	54	56	66	63	67
UTS2	ENSG00000049247	18	16	14	6	5	4	12	5	14	12	9	11
TNFRSF9	ENSG00000049249	3	4	0	3	1	1	0	0	0	2	2	0
EPN3	ENSG00000049283	2	2	1	3	9	3	2	1	2	2	4	2
LTBP1	ENSG00000049323	6920	6508	6999	1189	1367	1191	1254	1127	1448	3121	3001	3213
RCN1	ENSG00000049449	3412	3299	3457	3278	3967	3325	4024	4725	5054	3571	3997	3945
ELN	ENSG00000049540	2748	2491	3267	807	912	724	526	550	690	1360	1318	1560
RFC2	ENSG00000049541	1231	1363	1383	301	337	249	345	422	449	626	707	694
ARID1B	ENSG00000049618	1550	1321	1528	1299	1598	1375	1738	1699	1941	1529	1539	1615
CLPTM1L	ENSG00000049656	1786	1775	1884	1343	1431	1202	1156	986	1373	1428	1397	1486
NEDD4L	ENSG00000049759	849	799	746	872	1194	1108	1494	1309	1667	1072	1101	1174
FOXP3	ENSG00000049768	21	10	13	4	10	11	12	6	17	12	9	14
PPP1R3F	ENSG00000049769	56	50	46	165	144	134	148	130	204	123	108	128
HEXB	ENSG00000049860	1572	1659	1393	547	674	619	617	553	828	912	962	947
PTCD2	ENSG00000049883	191	201	182	81	120	87	149	167	197	140	163	155
NEXMIF	ENSG00000050030	156	134	145	51	81	75	135	121	131	114	112	117
JKAMP	ENSG00000050130	570	596	544	450	594	471	586	498	679	535	563	565
DKK3	ENSG00000050165	815	822	834	1009	1152	973	1124	1143	1402	983	1039	1070
ARHGEF5	ENSG00000050327	7	18	15	11	10	9	9	15	19	9	14	14
NFE2L3	ENSG00000050344	201	202	178	92	102	100	122	93	146	138	132	141
MCUR1	ENSG00000050393	732	785	775	324	385	294	492	622	617	516	597	562
LIMA1	ENSG00000050405	2780	2642	2693	1487	1839	1551	2014	2028	2413	2094	2170	2219
LETMD1	ENSG00000050426	435	373	397	835	904	778	840	701	1033	703	659	736
SLC4A8	ENSG00000050438	288	296	292	358	425	395	444	368	414	363	363	367
LAMC3	ENSG00000050555	96	78	92	294	358	301	254	266	299	215	234	231
PTGER3	ENSG00000050628	17	12	13	2	3	2	10	7	13	10	7	9
TNIP3	ENSG00000050730	5	3	0	0	0	0	1	5	4	2	3	1
MAPK9	ENSG00000050748	841	839	791	411	501	410	616	561	704	623	634	635
COL23A1	ENSG00000050767	192	188	234	324	361	299	264	251	297	260	267	277
BCAR1	ENSG00000050820	2186	1889	2222	805	789	670	678	680	803	1223	1119	1232
FAM160A2	ENSG00000051009	263	216	266	339	472	374	307	228	341	303	305	327
HERPUD1	ENSG00000051108	1175	1190	1299	813	1044	762	767	830	919	918	1021	993
HOMER3	ENSG00000051128	374	353	392	340	349	322	329	385	454	348	362	389
RAD51	ENSG00000051180	674	683	702	113	108	106	169	150	193	319	314	334
POLQ	ENSG00000051341	796	708	697	132	181	187	287	261	260	405	383	381
PIK3CB	ENSG00000051382	295	339	277	154	160	136	257	194	245	235	231	219
CYBA	ENSG00000051523	304	276	357	186	159	151	84	63	138	191	166	215
THOC3	ENSG00000051596	89	111	112	41	39	33	49	33	69	60	61	71
HEBP2	ENSG00000051620	662	697	713	357	458	362	546	618	703	522	591	593
MPHOSPH9	ENSG00000051825	764	732	652	373	543	410	643	590	599	593	622	554
PLEKHA5	ENSG00000052126	427	395	374	275	338	343	498	505	579	400	413	432
PRSS8	ENSG00000052344	0	3	1	1	0	1	0	0	2	0	1	1
SIKE1	ENSG00000052723	774	713	592	457	655	599	1160	972	1171	797	780	787
RRP12	ENSG00000052749	1374	1303	1333	766	745	732	554	567	659	898	872	908
FNIP2	ENSG00000052795	640	555	555	338	465	370	617	510	631	532	510	519
MSMO1	ENSG00000052802	1529	1484	1189	1130	1705	1338	2255	1904	2711	1638	1698	1746
TTC17	ENSG00000052841	877	828	915	1472	1822	1627	1678	1733	1861	1342	1461	1468
ALX4	ENSG00000052850	19	20	14	102	133	101	128	110	139	83	88	85
FSTL4	ENSG00000053108	44	36	30	49	48	45	21	24	29	38	36	35
FOXN3	ENSG00000053254	1697	1530	1617	1193	1460	1344	2115	1876	2236	1668	1622	1732
METTL24	ENSG00000053328	2	2	0	5	7	4	8	5	3	5	5	2
AKR7A2	ENSG00000053371	469	434	483	419	438	360	440	392	516	443	421	453
MRTO4	ENSG00000053372	2234	2328	2278	605	636	508	701	648	949	1180	1204	1245
NNAT	ENSG00000053438	23	22	28	151	206	204	211	255	226	128	161	153
USE1	ENSG00000053501	197	183	218	186	154	144	163	163	187	182	167	183
MCF2L2	ENSG00000053524	229	221	183	73	108	78	135	113	158	146	147	140
NRIP2	ENSG00000053702	14	29	28	40	55	68	65	42	60	40	42	52
LAMA3	ENSG00000053747	24	23	27	73	86	81	47	68	72	48	59	60
AP5M1	ENSG00000053770	592	574	478	307	443	380	679	559	752	526	525	537
ANAPC4	ENSG00000053900	403	434	356	335	403	373	427	335	454	388	391	394
KCNQ1	ENSG00000053918	7	4	4	29	29	24	45	36	57	27	23	28
TRAPPC3	ENSG00000054116	747	714	817	442	536	392	538	628	622	576	626	610
THRAP3	ENSG00000054118	4856	4761	5016	2495	2751	2474	3178	3655	3634	3510	3722	3708
PHPT1	ENSG00000054148	617	625	732	965	895	769	813	759	998	798	760	833
ENTPD2	ENSG00000054179	2	1	2	78	78	75	109	112	138	63	64	72
LY75	ENSG00000054219	2	2	2	20	15	13	20	23	17	14	13	11
ARID4B	ENSG00000054267	1532	1587	1500	1099	1398	1216	1732	2042	2054	1454	1676	1590
OPN3	ENSG00000054277	332	375	345	825	958	734	930	806	1166	696	713	748
SDCCAG8	ENSG00000054282	280	305	272	233	264	232	318	372	385	277	314	296
PTPRN	ENSG00000054356	138	130	122	36	47	32	27	21	33	67	66	62
HHAT	ENSG00000054392	211	170	206	131	142	137	165	140	196	169	151	180
KIF1B	ENSG00000054523	3841	3461	3443	5201	6879	6325	8828	7343	9071	5957	5894	6280
FOXC1	ENSG00000054598	431	351	486	248	331	251	229	268	268	303	317	335
TBC1D22A	ENSG00000054611	333	338	360	251	325	286	342	306	384	309	323	343
SYNE2	ENSG00000054654	1502	1153	1165	887	1104	1144	1553	1297	1392	1314	1185	1234
PLEKHH1	ENSG00000054690	66	50	61	98	130	95	118	96	128	94	92	95
ATP9A	ENSG00000054793	1217	1103	1031	2366	2922	2684	2908	2485	3184	2164	2170	2300
SPO11	ENSG00000054796	0	0	0	0	0	0	0	0	0	0	0	0
CBLN4	ENSG00000054803	0	0	0	1	0	1	2	0	1	1	0	1
CHRDL2	ENSG00000054938	1	5	2	4	1	1	2	0	0	2	2	1
FAM168A	ENSG00000054965	1453	1335	1431	1225	1471	1287	1614	1495	1752	1431	1434	1490
RELT	ENSG00000054967	139	140	142	80	68	57	60	39	59	93	82	86
GALC	ENSG00000054983	432	433	438	609	732	605	693	675	772	578	613	605
NOP58	ENSG00000055044	2953	2900	2879	911	1145	998	1369	1658	1636	1744	1901	1838
SZRD1	ENSG00000055070	3198	3058	3534	1631	1726	1501	2027	2019	2403	2285	2268	2479
KCNH2	ENSG00000055118	198	169	223	906	999	804	793	794	935	632	654	654
CUL1	ENSG00000055130	1725	1918	1801	1088	1238	1103	1390	1571	1778	1401	1576	1561
FAM114A2	ENSG00000055147	500	461	459	302	382	292	481	485	591	428	443	447
CYFIP2	ENSG00000055163	893	860	873	599	678	567	558	614	650	683	717	697
TAB2	ENSG00000055208	1539	1498	1440	963	1145	940	1536	1955	1798	1346	1533	1393
GINM1	ENSG00000055211	757	724	687	411	484	400	566	618	681	578	609	589
EIF2AK2	ENSG00000055332	1860	1621	1497	783	1281	991	1620	1733	1751	1421	1545	1413
USP36	ENSG00000055483	1078	1034	1080	728	769	700	695	703	795	834	835	858
KMT2C	ENSG00000055609	1393	1130	1271	1339	1853	1928	2404	2152	2179	1712	1712	1793
MCOLN3	ENSG00000055732	15	14	14	48	66	71	53	51	32	39	44	39
CCDC85A	ENSG00000055813	38	30	49	19	23	16	33	28	40	30	27	35
PUM2	ENSG00000055917	1581	1547	1401	1124	1364	1280	2019	1730	2302	1575	1547	1661
MRPL43	ENSG00000055950	546	584	632	438	447	406	452	477	646	479	503	561
ITIH4	ENSG00000055955	26	31	28	975	904	916	593	497	623	531	477	522
ITIH1	ENSG00000055957	0	0	0	0	0	0	1	0	0	0	0	0
HPF1	ENSG00000056050	434	470	415	225	250	207	377	450	490	345	390	371
ZFR	ENSG00000056097	2815	2538	2439	1493	2039	1723	2885	3491	3266	2398	2689	2476
ZNF280C	ENSG00000056277	188	145	169	126	169	163	246	222	282	187	179	205
NPFFR2	ENSG00000056291	2	3	2	0	0	0	0	0	2	1	1	1
PHF21B	ENSG00000056487	183	175	197	271	310	279	242	286	294	232	257	257
TRAF1	ENSG00000056558	26	29	39	111	142	117	114	87	122	84	86	93
RC3H2	ENSG00000056586	1384	1215	1091	1407	1854	1637	2857	2180	2840	1883	1750	1856
KIFC1	ENSG00000056678	0	0	0	0	0	0	0	0	0	0	0	0
IL17RB	ENSG00000056736	50	56	53	43	70	59	93	63	86	62	63	66
TRAF3IP2	ENSG00000056972	114	110	129	145	140	145	157	182	198	139	144	157
GYG2	ENSG00000056998	205	246	292	573	618	581	716	588	837	498	484	570
DCBLD2	ENSG00000057019	6921	6132	5328	1306	1717	1539	2178	1657	2302	3468	3169	3056
SERPINB3	ENSG00000057149	1	1	0	0	0	0	0	0	0	0	0	0
SOAT1	ENSG00000057252	1463	1293	1132	377	522	482	597	415	630	812	743	748
PKP2	ENSG00000057294	126	116	106	481	552	504	715	754	835	441	474	482
MSH4	ENSG00000057468	3	0	1	6	5	6	9	4	7	6	3	5
F7	ENSG00000057593	4	2	0	3	5	4	8	4	3	5	4	2
GDI2	ENSG00000057608	7374	7725	7287	3915	4482	3903	5569	5570	6711	5619	5926	5967
PRDM1	ENSG00000057657	11	14	16	8	9	7	5	5	6	8	9	10
ATG5	ENSG00000057663	525	607	492	198	268	217	362	295	413	362	390	374
TMCC3	ENSG00000057704	164	149	157	227	296	231	483	420	552	291	288	313
PITHD1	ENSG00000057757	826	826	873	420	419	371	453	410	522	566	552	589
MTA3	ENSG00000057935	483	501	517	590	645	573	763	824	893	612	657	661
USP13	ENSG00000058056	1188	1096	1027	787	1019	948	1282	1101	1345	1086	1072	1107
ATP11B	ENSG00000058063	1234	1149	1004	676	1014	948	1384	1215	1362	1098	1126	1105
LAMC2	ENSG00000058085	1145	1014	1089	26	26	26	28	24	25	400	355	380
CDK14	ENSG00000058091	1232	1243	1131	609	793	717	1134	1009	1224	992	1015	1024
SEC61A1	ENSG00000058262	7652	7198	7810	5659	6343	5117	4811	4320	5660	6041	5954	6196
PPP1R12A	ENSG00000058272	2176	1955	2012	1233	1622	1387	1901	2177	2116	1770	1918	1838
RASGRF1	ENSG00000058335	25	33	29	16	11	15	22	23	15	21	22	20
CAMK2B	ENSG00000058404	42	39	29	57	48	25	42	36	58	47	41	37
CROCC	ENSG00000058453	214	151	226	227	221	188	171	161	189	204	178	201
POLR3E	ENSG00000058600	561	520	556	569	684	569	612	642	749	581	615	625
ATP2B4	ENSG00000058668	2939	2531	2579	2292	3077	2778	3092	2960	3288	2774	2856	2882
ZC3H11A	ENSG00000058673	2007	1905	1871	2453	3002	2752	3525	2921	3714	2662	2609	2779
RIOK2	ENSG00000058729	791	747	688	442	521	447	638	679	768	624	649	634
YIPF1	ENSG00000058799	300	276	330	234	306	225	257	244	325	264	275	293
NDC1	ENSG00000058804	1739	1587	1402	392	513	415	763	606	824	965	902	880
DGKG	ENSG00000058866	110	103	129	76	74	62	109	118	122	98	98	104
FLYWCH1	ENSG00000059122	471	450	506	355	396	316	324	289	366	383	378	396
UNKL	ENSG00000059145	209	208	242	233	239	217	221	145	205	221	197	221
TBXAS1	ENSG00000059377	53	25	34	23	24	31	25	22	21	34	24	29
PARP12	ENSG00000059378	56	57	66	56	85	58	64	34	64	59	59	63
ALDH18A1	ENSG00000059573	2501	2463	2500	1532	1604	1381	1578	1357	1930	1870	1808	1937
TARBP1	ENSG00000059588	509	451	431	497	669	585	610	401	609	539	507	542
GATB	ENSG00000059691	397	410	391	352	341	296	386	389	515	378	380	401
MXD1	ENSG00000059728	267	232	256	207	228	198	319	321	330	264	260	261
CDK17	ENSG00000059758	807	672	646	336	470	412	722	616	709	622	586	589
DNAJC25	ENSG00000059769	271	244	255	136	197	174	202	221	270	203	221	233
SLC2A3	ENSG00000059804	1397	1391	1548	422	488	437	620	463	709	813	781	898
PSD	ENSG00000059915	75	49	86	176	155	161	137	104	170	129	103	139
CTDP1	ENSG00000060069	508	488	519	273	267	250	262	247	299	348	334	356
YBX3	ENSG00000060138	5165	4937	5393	2568	2764	2293	4509	5250	5541	4081	4317	4409
STYK1	ENSG00000060140	12	10	7	0	0	1	2	4	2	5	5	3
WNK1	ENSG00000060237	5099	4474	4864	2082	2685	2609	3003	3399	3162	3395	3519	3545
RPS17P5	ENSG00000060303	0	1	1	0	0	1	1	0	0	0	0	1
CCAR1	ENSG00000060339	2482	2224	2262	1416	1725	1568	1933	2510	2338	1944	2153	2056
OGFR	ENSG00000060491	564	466	612	507	554	419	471	481	514	514	500	515
GNA15	ENSG00000060558	3	1	2	0	2	0	0	0	1	1	1	1
CREB3L3	ENSG00000060566	0	0	0	0	0	0	0	0	0	0	0	0
PIGV	ENSG00000060642	69	67	94	98	114	106	116	96	122	94	92	107
PTPRU	ENSG00000060656	502	419	537	583	614	542	527	454	601	537	496	560
SNRNP40	ENSG00000060688	1095	1125	1178	442	538	406	609	574	672	715	746	752
RIMBP2	ENSG00000060709	85	85	67	142	177	135	168	156	188	132	139	130
COL11A1	ENSG00000060718	4694	4174	4842	10226	12283	10842	8704	8903	10453	7875	8453	8712
QSER1	ENSG00000060749	2327	1981	1920	708	1131	1040	1831	1857	1964	1622	1656	1641
MPC1	ENSG00000060762	306	282	303	490	609	403	792	808	958	529	566	555
ACAA1	ENSG00000060971	356	353	383	420	460	391	425	360	504	400	391	426
BCAT1	ENSG00000060982	6706	5972	4867	1429	2171	1920	4126	3376	4544	4087	3840	3777
HDAC7	ENSG00000061273	1674	1464	1660	805	784	747	590	457	723	1023	902	1043
LZTS1	ENSG00000061337	1521	1392	1573	989	1120	908	903	864	1031	1138	1125	1171
PRDM6	ENSG00000061455	24	21	37	43	47	36	59	54	64	42	41	46
WNT8A	ENSG00000061492	0	0	0	0	0	0	0	0	1	0	0	0
SPAG4	ENSG00000061656	9	10	22	114	173	173	148	89	135	90	91	110
NCKAP1	ENSG00000061676	4556	4328	3747	1540	2111	1880	2886	2470	3305	2994	2970	2977
MRPS35	ENSG00000061794	993	1042	917	484	569	420	760	725	871	746	779	736
GUCY1B1	ENSG00000061918	100	104	105	190	189	197	239	247	247	176	180	183
SFSWAP	ENSG00000061936	1014	916	1032	1098	1226	1074	1032	1193	1132	1048	1112	1079
TNK2	ENSG00000061938	281	244	311	688	740	664	484	414	549	484	466	508
MON2	ENSG00000061987	904	839	757	692	981	960	1337	996	1189	978	939	969
CDH3	ENSG00000062038	41	58	66	205	218	203	157	137	178	134	138	149
ARSF	ENSG00000062096	1	1	1	2	0	0	2	1	0	2	1	0
GPBP1	ENSG00000062194	1548	1480	1349	1102	1349	1196	1872	2006	2183	1507	1612	1576
DGAT2	ENSG00000062282	9	7	9	11	11	9	13	8	11	11	9	10
ZNF112	ENSG00000062370	110	95	92	154	196	179	232	248	257	165	180	176
CS	ENSG00000062485	4676	4536	4735	2954	3024	2623	3431	3418	4021	3687	3659	3793
LTK	ENSG00000062524	2	4	3	270	244	210	193	99	187	155	116	133
MRPS24	ENSG00000062582	561	579	641	479	446	349	473	505	597	504	510	529
ELMO2	ENSG00000062598	808	760	866	905	970	763	836	796	902	850	842	844
WAPL	ENSG00000062650	1845	1746	1627	753	957	860	1364	1239	1413	1321	1314	1300
VMP1	ENSG00000062716	2329	2212	2232	922	1104	877	1098	1015	1231	1450	1444	1447
APPBP2	ENSG00000062725	943	858	759	854	1245	1000	1716	1504	1889	1171	1202	1216
POLD1	ENSG00000062822	934	877	957	326	363	311	299	272	358	520	504	542
SEZ6	ENSG00000063015	166	175	212	381	405	296	223	225	242	257	268	250
EIF4B	ENSG00000063046	5340	5353	5398	5455	6012	5328	7597	8193	9155	6131	6519	6627
SLC6A16	ENSG00000063127	15	20	24	123	136	128	136	96	141	91	84	98
BICRA	ENSG00000063169	287	225	267	240	272	291	229	292	259	252	263	272
SPHK2	ENSG00000063176	234	178	242	201	235	168	163	164	178	199	192	196
RPL18	ENSG00000063177	7788	8087	8912	8794	8420	7090	9425	10292	12152	8669	8933	9385
CA11	ENSG00000063180	44	34	41	332	356	266	221	305	297	199	232	201
ISOC2	ENSG00000063241	403	365	407	333	293	285	294	224	335	343	294	342
U2AF2	ENSG00000063244	4204	4124	4518	1908	2029	1772	1923	2104	2404	2678	2752	2898
EPN1	ENSG00000063245	2072	1789	2189	1296	1358	1137	1152	1331	1533	1507	1493	1620
MED29	ENSG00000063322	806	772	835	550	654	470	641	799	795	666	742	700
AHRR	ENSG00000063438	114	102	114	84	90	80	84	68	104	94	87	99
GSC2	ENSG00000063515	0	0	0	0	0	0	0	0	0	0	0	0
ZNF275	ENSG00000063587	755	661	692	380	474	404	513	466	594	549	534	563
MTMR1	ENSG00000063601	473	479	481	481	587	514	700	592	751	551	553	582
GPC1	ENSG00000063660	975	847	1058	4014	4263	3610	2535	2372	3153	2508	2494	2607
ADCK1	ENSG00000063761	60	89	79	85	112	106	73	90	96	73	97	94
HAGH	ENSG00000063854	271	291	289	272	289	217	303	283	370	282	288	292
RNF4	ENSG00000063978	1578	1566	1679	746	782	685	941	879	1014	1088	1076	1126
CASP8	ENSG00000064012	183	186	175	125	135	122	169	152	156	159	158	151
LIMCH1	ENSG00000064042	730	671	678	1498	1786	1635	2317	2443	2546	1515	1633	1620
INTS13	ENSG00000064102	837	886	859	468	502	441	623	685	819	643	691	706
TM7SF3	ENSG00000064115	716	679	727	365	456	436	479	400	512	520	512	558
DLX3	ENSG00000064195	0	0	1	2	3	0	1	0	0	1	1	0
SPA17	ENSG00000064199	239	214	248	57	89	70	86	136	153	127	146	157
TSPAN32	ENSG00000064201	2	0	1	9	8	7	11	11	22	7	6	10
CCN5	ENSG00000064205	0	1	3	2	1	6	7	3	5	3	2	5
DMRT3	ENSG00000064218	8	1	3	1	11	7	6	7	14	5	6	8
ST3GAL6	ENSG00000064225	204	184	187	62	86	62	108	72	107	125	114	119
ATP2C2	ENSG00000064270	10	10	7	6	8	12	9	9	13	8	9	11
NGFR	ENSG00000064300	817	764	874	5905	6383	5560	3395	3338	4064	3372	3495	3499
CDON	ENSG00000064309	1824	1670	1919	2192	2871	2487	2923	2412	3166	2313	2318	2524
TAF2	ENSG00000064313	922	879	817	479	608	553	833	791	864	745	759	745
HIPK2	ENSG00000064393	5015	4219	3941	2442	3038	2782	3897	3612	3754	3785	3623	3492
TNPO3	ENSG00000064419	2256	2097	2249	1043	1252	1048	1282	1237	1495	1527	1529	1597
BORCS8-MEF2B	ENSG00000064489	142	166	160	105	109	78	80	106	119	109	127	119
RFXANK	ENSG00000064490	441	464	496	349	353	298	313	330	411	368	382	402
TMEM161A	ENSG00000064545	177	130	191	218	247	184	139	115	173	178	164	183
LPAR2	ENSG00000064547	55	40	63	238	213	201	202	184	192	165	146	152
CTSA	ENSG00000064601	1143	1015	1229	1766	2001	1620	1083	1177	1244	1331	1398	1364
SUGP2	ENSG00000064607	1626	1429	1587	2711	3126	2679	2718	2362	2904	2352	2306	2390
SLC12A2	ENSG00000064651	775	665	616	1023	1354	1324	1565	1182	1591	1121	1067	1177
SNX24	ENSG00000064652	240	223	217	210	266	257	255	394	365	235	294	280
EYA2	ENSG00000064655	132	113	143	285	387	295	404	407	447	274	302	295
CNN2	ENSG00000064666	10415	10199	11468	4139	4181	3333	3385	3694	4248	5980	6025	6350
ABCA7	ENSG00000064687	22	25	26	168	168	176	84	65	107	91	86	103
SNCAIP	ENSG00000064692	105	106	113	285	340	332	379	390	419	256	279	288
DDX20	ENSG00000064703	787	788	667	398	497	442	567	578	632	584	621	580
BTBD1	ENSG00000064726	1498	1400	1245	979	1252	1002	1935	1702	2219	1471	1451	1489
FAR2	ENSG00000064763	480	461	395	110	182	151	251	203	258	280	282	268
BCAS1	ENSG00000064787	5	9	13	1217	1329	1078	1256	1670	1393	826	1003	828
POU1F1	ENSG00000064835	0	0	0	0	0	0	0	3	0	0	1	0
CHI3L2	ENSG00000064886	1	1	1	2	5	1	1	1	1	1	2	1
SBNO2	ENSG00000064932	569	456	518	306	313	308	263	267	335	379	345	387
PMS1	ENSG00000064933	356	326	296	233	322	296	499	499	533	363	382	375
HMG20B	ENSG00000064961	461	419	497	553	569	450	509	596	629	508	528	525
CALCRL	ENSG00000064989	127	104	95	194	249	239	334	294	357	218	216	230
TAF11	ENSG00000064995	592	656	580	466	523	428	697	640	845	585	606	618
ANKS1A	ENSG00000064999	600	575	671	1406	1639	1417	1565	1479	1835	1190	1231	1308
AP3D1	ENSG00000065000	4349	3980	4727	2612	2677	2392	2382	2748	2782	3114	3135	3300
ZNF76	ENSG00000065029	234	210	250	318	323	293	289	281	374	280	271	306
SLC9A3R2	ENSG00000065054	200	180	207	223	222	190	214	264	251	212	222	216
NTHL1	ENSG00000065057	118	121	148	116	123	99	122	108	137	119	117	128
UHRF1BP1	ENSG00000065060	730	667	670	475	588	519	655	625	775	620	627	655
GNAI3	ENSG00000065135	3213	3161	2713	965	1207	1032	1762	1420	2092	1980	1929	1946
IPO5	ENSG00000065150	8998	9044	8398	3976	4129	3808	5848	5569	6660	6274	6247	6289
OAT	ENSG00000065154	1367	1394	1260	773	867	733	933	720	1160	1024	994	1051
WDR3	ENSG00000065183	1769	1752	1621	843	915	808	1159	1110	1297	1257	1259	1242
PKN2	ENSG00000065243	1134	943	874	535	713	701	1079	942	1072	916	866	882
WDR18	ENSG00000065268	547	451	546	278	258	222	248	189	306	358	299	358
TRAM2	ENSG00000065308	7017	6864	6928	1292	1574	1409	1340	1160	1556	3216	3199	3298
NTN1	ENSG00000065320	140	98	164	396	476	373	557	609	569	364	394	369
GLP2R	ENSG00000065325	0	1	1	1	0	2	0	1	0	0	1	1
MCM10	ENSG00000065328	1605	1517	1510	180	179	170	258	336	303	681	677	661
DGKA	ENSG00000065357	221	229	248	202	237	226	158	154	189	194	207	221
ERBB3	ENSG00000065361	79	87	113	1926	2128	2048	1758	1714	1840	1254	1310	1334
ROPN1	ENSG00000065371	0	0	1	0	1	0	0	0	0	0	0	0
ANKRD44	ENSG00000065413	129	121	119	684	958	855	918	856	1016	577	645	663
KARS1	ENSG00000065427	4282	4455	4781	2110	2140	1845	2625	2625	3232	3006	3073	3286
ADAT1	ENSG00000065457	582	520	574	247	334	240	342	284	365	390	379	393
PDIA5	ENSG00000065485	706	658	676	429	496	439	349	364	464	495	506	526
TBC1D22B	ENSG00000065491	201	215	232	156	152	138	166	159	185	174	175	185
NDUFB4	ENSG00000065518	769	873	979	842	844	653	993	1067	1236	868	928	956
SPEN	ENSG00000065526	2243	1875	2076	1502	1888	1690	2000	2076	1986	1915	1946	1917
MYLK	ENSG00000065534	463	475	465	350	462	388	951	915	1085	588	617	646
ZC3H15	ENSG00000065548	2115	2143	1849	981	1152	1001	1570	1952	1893	1555	1749	1581
MAP2K4	ENSG00000065559	731	746	728	510	554	469	752	740	866	664	680	688
PACC1	ENSG00000065600	215	201	209	150	182	122	164	144	189	176	176	173
SNAP91	ENSG00000065609	112	108	92	226	279	247	287	286	304	208	224	214
SLK	ENSG00000065613	2125	1879	1822	860	1146	1030	1622	1804	1736	1536	1610	1529
CYB5R4	ENSG00000065615	212	199	154	159	194	162	295	273	337	222	222	218
COL17A1	ENSG00000065618	13	12	10	1	4	1	0	0	1	5	5	4
GSTO2	ENSG00000065621	36	26	25	13	19	16	15	14	20	21	20	20
SEC61A2	ENSG00000065665	469	440	457	340	392	313	383	387	466	397	406	412
PRKCQ	ENSG00000065675	24	17	25	136	124	103	129	132	137	96	91	88
TLE2	ENSG00000065717	13	9	20	21	19	21	37	54	48	24	27	30
ASB1	ENSG00000065802	700	717	784	1456	1476	1328	1371	996	1596	1176	1063	1236
FAM107B	ENSG00000065809	591	591	522	197	235	176	363	301	437	384	376	378
ME1	ENSG00000065833	273	278	242	119	147	159	190	172	190	194	199	197
TBC1D1	ENSG00000065882	1741	1630	1829	2113	2334	1931	2316	2363	2728	2057	2109	2163
CDK13	ENSG00000065883	973	900	927	736	906	870	1078	1081	1178	929	962	992
MTHFD2	ENSG00000065911	2734	2622	2522	597	713	636	1011	941	1157	1447	1425	1438
SLC9A7	ENSG00000065923	309	276	250	390	483	438	407	313	378	369	357	355
FOXJ2	ENSG00000065970	535	507	545	380	454	376	478	463	529	464	475	483
YBX1	ENSG00000065978	16809	16536	18746	9057	9816	7284	18769	31366	23958	14878	19239	16663
PDE4A	ENSG00000065989	137	131	173	262	287	244	287	290	283	229	236	233
PPP2R5A	ENSG00000066027	312	312	293	278	330	288	465	336	564	352	326	382
CTNNA2	ENSG00000066032	140	121	128	172	189	181	281	216	264	198	175	191
ELAVL1	ENSG00000066044	3250	3001	3113	1510	1652	1381	1980	2009	2400	2247	2221	2298
TIE1	ENSG00000066056	85	67	74	12	6	6	5	4	5	34	26	28
DIP2B	ENSG00000066084	1128	1095	998	1120	1315	1265	1611	1393	1617	1286	1268	1293
SMARCD1	ENSG00000066117	1528	1419	1552	942	1061	835	993	993	1028	1154	1158	1138
KDM4A	ENSG00000066135	848	759	826	860	976	793	981	937	1131	896	891	917
NFYC	ENSG00000066136	756	717	898	661	677	553	763	828	898	727	741	783
ZMYND12	ENSG00000066185	4	2	1	3	5	6	3	10	13	3	6	7
SLC9A3	ENSG00000066230	36	20	33	115	118	123	67	48	85	73	62	80
NGEF	ENSG00000066248	35	38	44	7	12	15	16	17	22	19	22	27
ASPM	ENSG00000066279	3154	2666	2246	396	642	617	971	1111	1004	1507	1473	1289
CD84	ENSG00000066294	1	1	0	0	0	2	0	2	0	0	1	1
ELOVL1	ENSG00000066322	1242	1247	1311	656	697	521	480	445	620	793	796	817
SPI1	ENSG00000066336	1	0	0	0	0	1	1	0	1	1	0	1
POLR1H	ENSG00000066379	223	204	251	166	155	138	179	144	220	189	168	203
MPPED2	ENSG00000066382	101	100	106	120	110	112	206	154	201	142	121	140
CLDN18	ENSG00000066405	1	6	8	6	17	9	8	7	8	5	10	8
ZBTB11	ENSG00000066422	654	565	540	366	422	374	556	532	668	525	506	527
ATXN3	ENSG00000066427	392	378	410	409	533	498	654	490	672	485	467	527
GOLGA5	ENSG00000066455	707	712	734	615	677	585	709	880	935	677	756	751
FGFR2	ENSG00000066468	112	117	128	234	290	238	452	454	424	266	287	263
LRRC40	ENSG00000066557	760	712	530	138	262	224	461	429	511	453	468	422
ISOC1	ENSG00000066583	272	299	304	106	119	120	172	174	221	183	197	215
EML1	ENSG00000066629	506	428	448	603	747	637	903	732	948	671	636	678
TRMT11	ENSG00000066651	228	223	191	166	185	144	226	247	276	207	218	204
THUMPD1	ENSG00000066654	1247	1221	1075	473	636	610	924	918	1051	881	925	912
MSANTD3	ENSG00000066697	1023	1015	978	212	239	189	304	365	360	513	540	509
KIF26A	ENSG00000066735	116	97	138	324	398	384	283	221	349	241	239	290
ATG2B	ENSG00000066739	708	592	564	489	670	733	867	630	774	688	631	690
ARFGEF1	ENSG00000066777	1079	984	932	811	1010	1027	1283	1230	1357	1058	1075	1105
ACSM2B	ENSG00000066813	0	0	0	0	0	0	1	1	0	0	0	0
ZFAT	ENSG00000066827	66	67	74	82	93	73	80	81	91	76	80	79
MTFR1	ENSG00000066855	466	496	444	163	248	205	346	327	347	325	357	332
STAG3	ENSG00000066923	130	104	135	285	378	354	360	328	356	258	270	282
FECH	ENSG00000066926	352	395	352	289	317	296	371	294	416	337	335	355
MYO9A	ENSG00000066933	888	928	854	1068	1378	1382	1738	1481	1728	1231	1262	1321
DDX3Y	ENSG00000067048	2006	1943	1690	883	1291	1196	1806	1653	2066	1565	1629	1651
PFKP	ENSG00000067057	4447	4163	4620	511	480	443	619	482	730	1859	1708	1931
IDI1	ENSG00000067064	1942	1774	1574	920	1313	1091	2291	2035	2678	1718	1707	1781
SP100	ENSG00000067066	461	483	465	198	312	236	281	327	341	313	374	347
KLF6	ENSG00000067082	3363	3073	3012	1441	1634	1484	1735	1578	2027	2180	2095	2174
PLPP1	ENSG00000067113	283	291	253	529	555	467	650	698	801	487	515	507
NEO1	ENSG00000067141	974	945	1009	1637	1939	1671	1685	1687	1796	1432	1524	1492
TRAM1	ENSG00000067167	3409	3131	2530	1184	1871	1485	2684	2330	2781	2426	2444	2265
PHKA1	ENSG00000067177	186	201	195	247	308	258	207	196	262	213	235	238
TNFRSF1A	ENSG00000067182	1726	1619	1864	955	1018	911	801	846	987	1161	1161	1254
CACNB1	ENSG00000067191	251	255	261	1641	1668	1435	1425	1588	1778	1106	1170	1158
EVI5	ENSG00000067208	630	529	527	383	476	421	720	563	743	578	523	564
STOML1	ENSG00000067221	150	161	160	181	187	155	146	124	188	159	157	168
PKM	ENSG00000067225	33427	32143	35762	14316	13907	12263	18100	20282	21777	21948	22111	23267
DHX29	ENSG00000067248	1317	1290	1110	867	975	875	1255	1203	1526	1146	1156	1170
DNTTIP2	ENSG00000067334	1921	1863	1855	788	749	737	989	1158	1307	1233	1257	1300
METTL22	ENSG00000067365	276	226	294	248	281	259	261	234	276	262	247	276
TP53BP1	ENSG00000067369	2311	2299	2275	2666	2973	2759	3206	2999	3317	2728	2757	2784
TRO	ENSG00000067445	646	587	708	1937	2139	1957	1766	1754	1979	1450	1493	1548
RRP15	ENSG00000067533	1007	1040	940	370	400	396	755	700	743	711	713	693
RHOA	ENSG00000067560	9861	10135	10273	4293	4528	3851	5918	5961	7008	6691	6875	7044
DHX8	ENSG00000067596	1202	1216	1157	750	747	692	807	735	879	920	899	909
PMS2P4	ENSG00000067601	34	42	28	26	19	25	45	28	41	35	30	31
PRKCZ	ENSG00000067606	166	136	166	122	113	98	118	113	139	135	121	134
ZFY	ENSG00000067646	243	190	182	168	234	182	381	326	353	264	250	239
IARS2	ENSG00000067704	2231	2319	2152	1380	1536	1439	1626	1305	1824	1746	1720	1805
SYT1	ENSG00000067715	221	195	182	176	201	201	221	211	265	206	202	216
NAV3	ENSG00000067798	1708	1408	1333	2237	2868	2627	2735	2463	2725	2227	2246	2228
IDH3G	ENSG00000067829	665	609	661	666	668	539	498	710	630	610	662	610
ROGDI	ENSG00000067836	149	164	183	154	173	176	154	194	179	152	177	179
PDZD4	ENSG00000067840	318	329	359	299	352	306	344	299	403	320	327	356
ATP2B3	ENSG00000067842	9	11	8	28	40	27	33	41	41	23	31	25
ROCK1	ENSG00000067900	2092	1826	1762	849	1080	1065	1549	1625	1692	1497	1510	1506
CBFB	ENSG00000067955	1313	1216	1028	307	463	397	826	656	862	815	778	762
PDK3	ENSG00000067992	111	107	94	13	41	33	51	58	60	58	69	62
HYAL2	ENSG00000068001	615	563	569	474	531	463	406	366	488	498	487	507
HDAC4	ENSG00000068024	365	320	350	396	481	434	480	416	494	414	406	426
RASSF1	ENSG00000068028	382	372	385	296	294	232	273	228	331	317	298	316
FGFR3	ENSG00000068078	136	137	138	149	188	166	283	205	312	189	177	205
IFI35	ENSG00000068079	35	19	37	32	36	28	27	30	37	31	28	34
HEATR6	ENSG00000068097	572	540	549	472	462	435	477	500	552	507	501	512
COASY	ENSG00000068120	716	621	766	477	429	411	423	417	481	539	489	553
PLEKHH3	ENSG00000068137	161	138	155	397	411	351	256	227	283	271	259	263
MEF2A	ENSG00000068305	711	622	607	515	637	590	1079	1022	1150	768	760	782
OTUD5	ENSG00000068308	928	851	997	641	711	587	611	740	730	727	767	771
TFE3	ENSG00000068323	825	751	920	594	716	616	612	664	785	677	710	774
TBC1D25	ENSG00000068354	188	181	191	182	178	157	169	163	204	180	174	184
ACSL4	ENSG00000068366	2014	1811	1582	669	835	748	1196	1098	1300	1293	1248	1210
INPP5A	ENSG00000068383	754	720	751	617	657	568	788	698	919	720	692	746
GPKOW	ENSG00000068394	348	322	373	240	197	194	211	240	281	266	253	283
GRIPAP1	ENSG00000068400	461	389	442	593	549	543	522	592	606	525	510	530
FTSJ1	ENSG00000068438	1057	955	1152	406	421	367	412	421	481	625	599	667
PRR11	ENSG00000068489	2784	2727	2881	366	383	340	623	757	650	1258	1289	1290
REEP1	ENSG00000068615	261	277	219	967	1196	1084	1150	957	1329	793	810	877
ATP11A	ENSG00000068650	570	511	528	385	571	499	602	509	575	519	530	534
POLR1A	ENSG00000068654	3037	2709	2840	1708	1992	1819	2091	1688	2136	2279	2130	2265
LAPTM4A	ENSG00000068697	2602	2638	2473	3295	4083	3359	3697	3176	4325	3198	3299	3386
TTC7A	ENSG00000068724	320	289	354	164	204	168	128	126	168	204	206	230
IP6K2	ENSG00000068745	767	770	852	1077	1183	925	1092	1227	1320	979	1060	1032
STON1-GTF2A1L	ENSG00000068781	122	125	116	226	274	218	337	382	356	228	260	230
SRBD1	ENSG00000068784	560	571	556	257	257	230	344	396	398	387	408	395
KIF2A	ENSG00000068796	1647	1570	1396	825	1065	998	1432	1468	1630	1301	1368	1341
RASGRP2	ENSG00000068831	11	6	8	105	105	98	113	99	124	76	70	77
PSME4	ENSG00000068878	2518	2474	2457	1289	1501	1457	1672	1560	1899	1826	1845	1938
IFT80	ENSG00000068885	524	490	452	407	586	523	807	747	876	579	608	617
SIRT2	ENSG00000068903	581	494	673	1319	1314	1099	1448	1616	1700	1116	1141	1157
ERLEC1	ENSG00000068912	853	926	777	529	703	597	706	731	907	696	787	760
PPP2R5B	ENSG00000068971	202	182	185	247	224	208	199	172	231	216	193	208
PYGM	ENSG00000068976	11	10	13	594	611	558	448	506	552	351	376	374
PAGE1	ENSG00000068985	0	0	0	0	0	0	0	0	0	0	0	0
PITX1	ENSG00000069011	145	119	156	105	89	90	104	112	156	118	107	134
TRPC7	ENSG00000069018	2	1	3	3	11	4	1	3	4	2	5	4
MAST4	ENSG00000069020	271	207	232	206	314	284	366	358	384	281	293	300
ADGRF5	ENSG00000069122	54	36	30	62	77	87	94	93	97	70	69	71
SDK2	ENSG00000069188	564	459	522	1870	2210	2069	1959	1831	2072	1464	1500	1554
ADAM7	ENSG00000069206	0	0	0	0	0	1	1	1	0	0	0	0
NUP133	ENSG00000069248	1353	1349	1287	707	756	711	937	826	1116	999	977	1038
NUCKS1	ENSG00000069275	12458	11792	10979	5160	6674	5590	10567	10038	11735	9395	9501	9435
VPS35	ENSG00000069329	2880	2699	2620	1419	1688	1512	2133	2002	2535	2144	2130	2222
DNAJA2	ENSG00000069345	1584	1650	1432	859	955	779	1236	1304	1406	1226	1303	1206
BCL3	ENSG00000069399	103	99	119	48	72	65	68	111	95	73	94	93
KCNAB2	ENSG00000069424	41	42	50	84	104	77	79	68	99	68	71	75
ABCC9	ENSG00000069431	34	48	35	572	799	772	851	725	860	486	524	556
GAL	ENSG00000069482	76	86	78	2	3	0	2	2	2	27	30	27
CLEC2D	ENSG00000069493	91	81	74	149	163	157	210	186	266	150	143	166
FUNDC1	ENSG00000069509	156	179	170	115	113	112	223	234	230	165	175	171
MAOB	ENSG00000069535	2	4	3	55	64	43	91	96	130	49	55	59
RORA	ENSG00000069667	159	131	146	152	231	212	497	326	454	269	229	271
DRD4	ENSG00000069696	2	4	6	15	5	13	11	20	15	9	10	11
TGFBR3	ENSG00000069702	265	244	226	1314	1893	1632	1963	1630	2176	1181	1256	1345
NA	ENSG00000069712	49	32	46	43	69	54	73	89	113	55	63	71
PLA2G10	ENSG00000069764	1	2	5	2	4	1	1	3	7	1	3	4
HES2	ENSG00000069812	3	4	2	19	16	23	8	13	20	10	11	15
ATP1B3	ENSG00000069849	2399	2305	2184	1945	1976	1820	1970	1417	2190	2105	1899	2065
NEDD4	ENSG00000069869	961	901	807	255	347	268	350	342	384	522	530	486
PIGB	ENSG00000069943	149	132	105	92	137	98	155	128	166	132	132	123
MAPK6	ENSG00000069956	2432	2292	2065	835	1032	916	1723	1761	1841	1663	1695	1607
GNB5	ENSG00000069966	199	193	179	150	139	160	151	124	172	167	152	170
RAB27A	ENSG00000069974	338	343	295	92	107	106	136	143	158	189	198	186
HDHD5	ENSG00000069998	576	590	666	425	415	347	482	368	622	494	458	545
UFD1	ENSG00000070010	1283	1340	1515	595	726	524	667	725	739	848	930	926
LRP6	ENSG00000070018	939	880	843	1016	1416	1339	1697	1522	1648	1217	1273	1277
GUCY2C	ENSG00000070019	4	2	2	2	3	7	7	2	2	4	2	4
SCT	ENSG00000070031	10	15	7	35	40	38	73	99	123	39	51	56
PHRF1	ENSG00000070047	1352	1199	1434	894	869	764	798	852	947	1015	973	1048
ELP1	ENSG00000070061	1518	1456	1361	1156	1245	1121	1383	1076	1496	1352	1259	1326
NUCB2	ENSG00000070081	1129	1095	1190	696	785	689	678	874	865	834	918	915
PFN2	ENSG00000070087	4338	4356	4053	1758	2318	1868	3550	2993	4081	3215	3222	3334
PTPN3	ENSG00000070159	85	71	67	46	46	25	59	40	63	63	52	52
SPTB	ENSG00000070182	179	132	152	4337	4651	4524	3231	2667	3438	2582	2483	2705
DAPP1	ENSG00000070190	2	1	0	2	1	1	5	3	1	3	2	1
FGF10	ENSG00000070193	10	10	3	9	10	10	12	26	14	10	15	9
SLC44A1	ENSG00000070214	718	664	581	1816	2374	2044	2584	2424	2768	1706	1821	1798
TMEM260	ENSG00000070269	234	204	202	278	348	298	373	302	417	295	285	306
SMG6	ENSG00000070366	903	886	987	1014	1070	925	971	1078	1094	963	1011	1002
EXOC5	ENSG00000070367	1596	1512	1174	652	911	795	1598	1371	1673	1282	1265	1214
CLTCL1	ENSG00000070371	223	209	263	343	374	339	321	287	363	296	290	322
FGF22	ENSG00000070388	0	2	2	2	7	5	1	3	4	1	4	4
FSTL3	ENSG00000070404	447	423	533	287	337	219	344	297	428	359	352	393
DGCR2	ENSG00000070413	892	751	872	1408	1482	1259	1205	1103	1482	1168	1112	1204
RNF126	ENSG00000070423	853	724	843	353	397	260	335	365	419	514	495	507
MNT	ENSG00000070444	519	446	543	448	499	439	431	422	480	466	456	487
ZXDC	ENSG00000070476	371	338	371	364	432	393	388	333	464	374	368	409
JMJD6	ENSG00000070495	575	534	576	454	460	421	476	477	574	502	490	524
POLB	ENSG00000070501	314	362	364	209	277	199	295	338	390	273	326	318
ST6GALNAC1	ENSG00000070526	1	0	0	0	1	1	0	0	0	0	0	0
WIPI1	ENSG00000070540	392	402	452	752	902	727	774	913	1023	639	739	734
FRMPD1	ENSG00000070601	38	42	42	188	207	191	173	149	233	133	133	155
GBA2	ENSG00000070610	588	528	614	1298	1394	1235	1093	1090	1265	993	1004	1038
NDST1	ENSG00000070614	3257	3052	3311	2138	2410	2261	2167	2030	2477	2521	2497	2683
ASNS	ENSG00000070669	2051	2226	2190	828	949	805	898	851	1066	1259	1342	1354
AP3M2	ENSG00000070718	517	551	570	545	594	523	678	587	716	580	577	603
CNGB1	ENSG00000070729	0	2	5	4	2	6	2	4	4	2	3	5
ST6GALNAC2	ENSG00000070731	1822	1833	1836	2262	2049	1743	2417	2350	3060	2167	2077	2213
CHAT	ENSG00000070748	1	0	1	0	1	1	3	3	2	1	1	1
PABPC1	ENSG00000070756	24789	22974	25163	14023	16449	13569	18065	27161	22335	18959	22195	20356
TESK2	ENSG00000070759	39	36	44	37	33	26	32	40	38	36	36	36
CFAP20	ENSG00000070761	664	665	711	445	460	365	551	788	618	553	638	565
CSNK2A2	ENSG00000070770	2268	2125	2126	1135	1303	1136	1539	1559	1784	1647	1662	1682
PTPN21	ENSG00000070778	695	616	612	1151	1328	1164	1462	1515	1645	1103	1153	1140
EIF2B3	ENSG00000070785	652	710	639	349	345	330	364	412	476	455	489	482
CAMK2A	ENSG00000070808	21	15	13	554	658	530	521	470	603	365	381	382
TCOF1	ENSG00000070814	3017	2892	3144	911	916	881	882	1061	1060	1603	1623	1695
CDC42	ENSG00000070831	4611	4566	4632	2129	2480	1944	3194	3204	3965	3311	3417	3514
OSBPL3	ENSG00000070882	520	451	445	182	207	203	223	188	252	308	282	300
EPHA8	ENSG00000070886	1	1	3	4	0	2	1	0	1	2	0	2
SLC12A3	ENSG00000070915	1	0	1	0	0	1	2	1	1	1	0	1
RAD18	ENSG00000070950	976	833	780	97	157	135	172	186	205	415	392	373
ATP2B1	ENSG00000070961	2473	2247	2136	2404	3198	2924	3472	3036	3790	2783	2827	2950
TRPM5	ENSG00000070985	2	2	1	2	3	4	5	3	2	3	3	2
NCK2	ENSG00000071051	717	692	711	653	681	596	832	921	1002	734	765	770
MAP4K4	ENSG00000071054	12006	11444	11792	7049	7930	7098	7551	8495	8331	8869	9290	9074
MGAT4A	ENSG00000071073	70	57	60	47	67	56	104	74	107	74	66	74
RPL31	ENSG00000071082	5104	5787	5923	7933	7945	6609	10990	10629	13901	8009	8120	8811
WDR1	ENSG00000071127	12798	12472	13170	3457	3486	2906	3385	3331	3944	6547	6430	6673
SNX13	ENSG00000071189	609	655	520	447	680	560	968	873	978	675	736	686
MS4A12	ENSG00000071203	1	0	1	0	0	0	0	0	0	0	0	0
ARHGAP10	ENSG00000071205	876	854	914	541	634	532	532	568	671	650	685	706
RPS6KA2	ENSG00000071242	1091	1058	1171	1007	1047	967	974	1008	1156	1024	1038	1098
ING3	ENSG00000071243	200	208	192	122	151	149	232	253	270	185	204	204
VASH1	ENSG00000071246	859	756	921	3898	3943	3655	2749	2308	3004	2502	2336	2527
LMCD1	ENSG00000071282	816	883	953	329	330	334	613	493	741	586	569	676
BUD23	ENSG00000071462	1145	1146	1200	669	696	610	584	609	729	799	817	846
SEL1L	ENSG00000071537	2556	2383	2261	1540	2161	1902	2235	2155	2486	2110	2233	2216
TRIP13	ENSG00000071539	1720	1779	1696	176	208	181	288	230	324	728	739	734
ATP6AP1	ENSG00000071553	1133	1111	1267	1299	1417	1224	940	830	1182	1124	1119	1224
TCF3	ENSG00000071564	2480	2254	2774	2025	2206	1797	2318	2488	2754	2274	2316	2442
TRIB2	ENSG00000071575	1701	1628	1703	1270	1418	1201	1785	1460	1935	1585	1502	1613
DAZAP1	ENSG00000071626	2830	2696	3031	1178	1248	1049	1294	1415	1501	1767	1786	1860
MBD3	ENSG00000071655	1630	1514	1863	1028	1226	975	1101	1072	1207	1253	1271	1348
PRLH	ENSG00000071677	0	0	0	0	0	0	0	0	0	0	0	0
HLTF	ENSG00000071794	1031	947	827	552	741	614	1005	871	1066	863	853	836
FAM50A	ENSG00000071859	1206	1205	1375	888	843	784	801	983	946	965	1010	1035
FAM3A	ENSG00000071889	296	304	334	307	304	279	198	288	304	267	299	306
CPSF1	ENSG00000071894	1353	1188	1467	1150	1131	1039	953	848	1064	1152	1056	1190
MYO3B	ENSG00000071909	2	3	3	3	5	5	14	12	18	6	7	9
CYBRD1	ENSG00000071967	999	907	906	1365	1779	1567	1713	1454	1898	1359	1380	1457
CDH19	ENSG00000071991	0	0	1	0	0	0	0	1	0	0	0	0
PDCD2	ENSG00000071994	1172	1209	1134	548	594	543	717	803	964	812	869	880
SLC6A15	ENSG00000072041	200	203	150	25	30	41	20	22	31	82	85	74
RDH11	ENSG00000072042	1510	1398	1495	1105	1237	1120	1212	1309	1450	1276	1315	1355
PRKACA	ENSG00000072062	2207	2157	2463	2139	2208	1946	2558	3101	3010	2301	2489	2473
ADGRL1	ENSG00000072071	737	607	678	896	1056	876	802	778	947	812	814	834
SPP2	ENSG00000072080	0	0	0	0	0	0	1	0	0	0	0	0
ACTN1	ENSG00000072110	17183	15535	16956	2476	2605	2288	2279	2273	2694	7313	6804	7313
ZFYVE26	ENSG00000072121	662	601	601	727	847	784	770	662	785	720	703	723
RPS6KA6	ENSG00000072133	85	76	67	58	90	74	123	89	121	89	85	87
EPN2	ENSG00000072134	581	514	555	579	696	579	788	837	920	649	682	685
PTPN18	ENSG00000072135	372	345	359	298	288	229	226	334	272	299	322	287
LIMS2	ENSG00000072163	221	204	229	182	152	149	137	155	190	180	170	189
ASIC4	ENSG00000072182	8	14	18	50	42	42	35	28	34	31	28	31
SPEG	ENSG00000072195	205	152	224	2225	2275	2199	1936	1765	2143	1455	1397	1522
LNX1	ENSG00000072201	186	222	254	136	166	175	222	186	228	181	191	219
ALDH3A2	ENSG00000072210	652	571	607	447	505	450	647	539	713	582	538	590
TFRC	ENSG00000072274	7563	7328	6640	1019	1294	1178	1912	1299	2085	3498	3307	3301
SREBF1	ENSG00000072310	406	324	443	911	957	852	688	628	803	668	636	699
TRPC5	ENSG00000072315	1	0	0	0	2	0	1	1	0	1	1	0
AFF4	ENSG00000072364	3958	3372	3289	1793	2648	2488	3533	2889	3542	3095	2970	3106
UBE2D1	ENSG00000072401	248	229	173	92	131	125	323	284	324	221	215	207
MPP5	ENSG00000072415	698	664	593	356	411	395	698	665	710	584	580	566
RHOBTB1	ENSG00000072422	558	506	505	395	530	433	526	526	647	493	521	528
SMC1A	ENSG00000072501	4144	3723	4022	1518	1897	1625	2022	2288	2179	2561	2636	2609
HSD17B10	ENSG00000072506	887	995	1030	617	624	539	656	611	813	720	743	794
MARK2	ENSG00000072518	695	595	660	498	535	483	482	533	555	558	554	566
HMMR	ENSG00000072571	1374	1358	1083	108	187	170	282	342	352	588	629	535
CHFR	ENSG00000072609	657	617	650	618	636	553	609	563	700	628	605	634
TRHDE	ENSG00000072657	22	19	14	9	11	13	7	10	6	13	13	11
P4HA2	ENSG00000072682	1905	1898	2068	1685	1875	1600	1291	1055	1570	1627	1609	1746
FCGR2B	ENSG00000072694	0	0	0	0	0	0	0	0	0	0	0	0
NFATC3	ENSG00000072736	991	1019	989	624	787	688	905	908	1052	840	905	910
TRNT1	ENSG00000072756	376	377	355	284	378	359	475	418	576	378	391	430
ACADVL	ENSG00000072778	1673	1607	1857	2535	2339	2223	1623	1675	1918	1944	1874	1999
STK10	ENSG00000072786	1046	931	1111	460	495	453	433	422	497	646	616	687
FBXW11	ENSG00000072803	1150	1086	1015	758	879	816	1288	901	1388	1065	955	1073
ACAP1	ENSG00000072818	44	22	37	105	100	73	93	96	99	81	73	70
CRMP1	ENSG00000072832	2769	2693	2789	2849	2902	2585	3003	2921	3614	2874	2839	2996
EVC	ENSG00000072840	415	355	379	444	577	511	571	575	598	477	502	496
DERL2	ENSG00000072849	853	883	833	565	671	578	757	647	805	725	734	739
SIDT1	ENSG00000072858	2	3	3	6	3	5	17	5	6	8	4	5
NDE1	ENSG00000072864	842	839	878	249	338	222	295	322	384	462	500	495
IRAG1	ENSG00000072952	110	95	96	337	408	371	568	550	610	338	351	359
TMEM38A	ENSG00000072954	71	52	53	1115	1015	871	818	616	981	668	561	635
AP1M1	ENSG00000072958	1923	1817	2001	919	975	788	895	684	1026	1246	1159	1272
PVR	ENSG00000073008	1964	1689	1891	572	638	568	449	449	477	995	925	979
XRCC1	ENSG00000073050	535	514	596	443	439	353	462	598	542	480	517	497
SCARB1	ENSG00000073060	800	824	911	1078	1214	1093	1269	1188	1468	1049	1075	1157
CYP2W1	ENSG00000073067	3	1	2	17	21	22	29	8	23	16	10	16
MCM2	ENSG00000073111	3070	2872	3170	538	566	507	732	704	852	1447	1381	1510
MOV10L1	ENSG00000073146	2	5	0	0	1	0	0	0	1	1	2	0
PANX2	ENSG00000073150	26	35	21	5	12	4	7	9	9	13	19	11
SELENOO	ENSG00000073169	184	129	203	223	208	167	158	117	205	188	151	192
TP63	ENSG00000073282	37	37	38	262	305	255	388	434	450	229	259	248
ALPK1	ENSG00000073331	102	80	88	140	169	168	191	158	216	144	136	157
LLGL2	ENSG00000073350	13	16	13	21	30	18	14	7	12	16	18	14
PDE8A	ENSG00000073417	439	378	414	303	377	323	465	441	512	402	399	416
CLCN4	ENSG00000073464	259	271	250	536	670	649	640	515	734	478	485	544
NLE1	ENSG00000073536	500	491	489	257	229	232	287	229	324	348	316	348
SDHA	ENSG00000073578	1248	1169	1447	1045	1083	933	1156	1068	1320	1150	1107	1233
SMARCE1	ENSG00000073584	2498	2514	2663	1642	2115	1665	2693	3687	3231	2278	2772	2520
FNDC8	ENSG00000073598	30	32	31	18	15	26	19	21	22	22	23	26
GSDMB	ENSG00000073605	78	68	91	279	306	278	220	229	250	192	201	206
KDM5A	ENSG00000073614	1264	1248	1301	882	1201	1172	1483	1207	1358	1210	1219	1277
ADAM11	ENSG00000073670	31	28	31	129	139	121	84	52	83	81	73	78
PPP2R3A	ENSG00000073711	497	493	419	393	508	469	856	809	993	582	603	627
FERMT2	ENSG00000073712	5209	5161	5087	2068	2670	2184	3231	3250	3742	3503	3694	3671
ABCB11	ENSG00000073734	1	1	0	6	7	6	7	8	12	5	5	6
DHRS9	ENSG00000073737	1	0	0	3	0	0	1	0	0	2	0	0
CD5L	ENSG00000073754	0	0	0	0	0	0	0	0	0	0	0	0
PTGS2	ENSG00000073756	86	55	80	11	12	11	25	10	16	41	26	36
IGF2BP2	ENSG00000073792	4095	3757	4000	1899	2222	1926	2288	2974	2703	2761	2984	2876
MAP3K13	ENSG00000073803	416	368	360	297	384	329	472	524	544	395	425	411
ST6GAL1	ENSG00000073849	168	157	151	234	280	256	238	271	291	213	236	233
TBX21	ENSG00000073861	0	1	0	1	0	0	0	1	0	0	1	0
VDAC1P1	ENSG00000073905	4	2	5	0	2	1	2	2	5	2	2	4
FRY	ENSG00000073910	271	268	275	597	745	736	593	518	603	487	510	538
PICALM	ENSG00000073921	4921	4659	3991	1207	1699	1416	2223	2009	2565	2784	2789	2657
NSF	ENSG00000073969	927	843	840	594	642	631	737	747	773	753	744	748
GLI2	ENSG00000074047	484	359	419	231	282	236	232	255	253	316	299	303
CLASP1	ENSG00000074054	1787	1571	1703	2010	2295	2305	2758	2472	2870	2185	2113	2293
MRPS34	ENSG00000074071	854	801	940	502	506	368	473	770	665	610	692	658
NOTCH3	ENSG00000074181	2028	1650	2131	3420	4033	3626	3320	3112	3631	2923	2932	3129
CLNS1A	ENSG00000074201	1346	1459	1452	687	814	657	1166	1176	1477	1066	1150	1195
PPP2R2C	ENSG00000074211	36	29	28	33	34	30	63	62	89	44	42	49
TEAD2	ENSG00000074219	1161	1111	1297	1109	1189	1024	1220	1291	1443	1163	1197	1255
EED	ENSG00000074266	472	427	412	220	222	179	307	216	307	333	288	299
CDHR2	ENSG00000074276	49	35	54	34	46	35	38	43	41	40	41	43
SNCB	ENSG00000074317	2	2	4	2	2	4	4	8	6	3	4	5
TSG101	ENSG00000074319	805	852	919	702	895	655	922	1061	1123	810	936	899
NCBP3	ENSG00000074356	770	702	707	600	797	687	771	766	820	714	755	738
ATP2A3	ENSG00000074370	22	11	27	31	18	21	22	23	23	25	17	24
CA12	ENSG00000074410	288	273	307	83	84	75	117	88	128	163	148	170
MGLL	ENSG00000074416	1361	1225	1449	293	354	252	310	268	335	655	616	679
NTN4	ENSG00000074527	721	665	573	114	112	80	111	106	100	315	294	251
BCS1L	ENSG00000074582	601	592	597	397	358	317	267	271	356	422	407	423
NUAK1	ENSG00000074590	1497	1453	1510	1013	1049	973	927	758	980	1146	1087	1154
DPP8	ENSG00000074603	917	867	730	506	661	565	899	714	916	774	747	737
SLC24A1	ENSG00000074621	232	211	249	139	192	147	157	186	192	176	196	196
ZNF532	ENSG00000074657	1427	1357	1440	1357	1628	1412	2017	2225	2130	1600	1737	1661
SCARF1	ENSG00000074660	5	11	5	22	13	9	4	2	9	10	9	8
LMAN1	ENSG00000074695	4476	4111	3777	1915	2770	2426	3133	2796	3309	3175	3226	3171
HACD3	ENSG00000074696	3788	3718	3485	1515	1864	1489	1953	1944	2281	2419	2509	2418
IPCEF1	ENSG00000074706	0	3	1	3	2	6	8	4	7	4	3	5
ZZEF1	ENSG00000074755	1226	1115	1065	1026	1203	1097	1070	822	1012	1107	1047	1058
NOX3	ENSG00000074771	0	0	0	0	0	0	0	0	0	0	0	0
ENO1	ENSG00000074800	35095	35989	37892	6313	5924	5401	11626	8311	13862	17678	16741	19052
SLC12A1	ENSG00000074803	3	1	0	5	1	7	10	4	8	6	2	5
MYDGF	ENSG00000074842	1348	1421	1500	599	610	547	533	482	681	827	838	909
ANO8	ENSG00000074855	142	135	157	312	317	294	196	159	220	217	204	224
TUBE1	ENSG00000074935	210	204	187	205	223	239	315	258	274	243	228	233
ARHGEF10L	ENSG00000074964	202	207	213	370	362	334	300	209	344	291	259	297
TXK	ENSG00000074966	1	2	3	9	17	15	40	20	23	17	13	14
WSCD2	ENSG00000075035	17	14	15	36	30	19	64	83	87	39	42	40
KCNQ2	ENSG00000075043	127	122	127	108	120	115	125	130	164	120	124	135
TACR2	ENSG00000075073	10	7	8	3	6	8	12	8	16	8	7	11
ACTR6	ENSG00000075089	288	231	220	129	164	164	342	299	333	253	231	239
TIPIN	ENSG00000075131	553	583	508	64	101	87	109	160	172	242	281	256
SRI	ENSG00000075142	1209	1284	1367	577	577	543	711	637	900	832	833	937
EIF4G3	ENSG00000075151	2107	1949	2059	2337	2652	2501	2558	2949	2831	2334	2517	2464
NUP37	ENSG00000075188	593	563	555	160	177	133	244	191	234	332	310	307
SEMA3A	ENSG00000075213	1070	986	888	250	388	324	633	688	657	651	687	623
GTSE1	ENSG00000075218	1400	1304	1367	257	292	233	322	274	378	660	623	659
SEMA3C	ENSG00000075223	2901	2609	2576	1149	1559	1497	1888	1611	1981	1979	1926	2018
TTC38	ENSG00000075234	265	235	285	308	342	291	321	248	342	298	275	306
ACAT1	ENSG00000075239	909	872	887	833	892	740	1014	1084	1257	919	949	961
GRAMD4	ENSG00000075240	245	219	264	173	171	158	186	152	201	201	181	208
CELSR1	ENSG00000075275	428	353	385	481	517	477	403	354	450	437	408	437
WNT8B	ENSG00000075290	0	0	0	3	3	2	0	0	0	1	1	1
ZNF638	ENSG00000075292	1947	1784	1765	1960	2278	2254	2563	2728	2955	2157	2263	2325
SLC25A40	ENSG00000075303	294	235	221	91	139	112	250	190	229	212	188	187
TIMM21	ENSG00000075336	760	769	733	459	451	380	562	574	635	594	598	583
ADD2	ENSG00000075340	705	622	694	359	414	380	409	426	453	491	487	509
FGF4	ENSG00000075388	0	0	0	63	84	67	154	118	193	72	67	87
RASAL2	ENSG00000075391	1133	1000	912	1008	1321	1273	1664	1464	1591	1268	1262	1259
VPS9D1	ENSG00000075399	184	170	179	295	275	239	167	189	241	215	211	220
ZNF37A	ENSG00000075407	246	257	241	191	206	219	316	353	316	251	272	259
MARK3	ENSG00000075413	1540	1457	1493	1139	1257	1127	1382	1241	1597	1354	1318	1406
SLC25A3	ENSG00000075415	7148	7430	7406	7519	7374	6465	8960	6763	10606	7876	7189	8159
FNDC3B	ENSG00000075420	3561	3042	3088	1602	2001	1805	2374	2385	2723	2512	2476	2539
FOSL2	ENSG00000075426	2135	2032	2189	996	1074	944	1110	1039	1261	1414	1382	1465
CACNG5	ENSG00000075429	3	1	3	0	7	8	12	12	11	5	7	7
CACNG4	ENSG00000075461	671	653	726	710	778	592	742	757	894	708	729	737
FRYL	ENSG00000075539	1514	1323	1269	603	789	763	1028	923	1072	1048	1012	1035
TMEM131	ENSG00000075568	1492	1289	1308	1404	1782	1731	1825	1979	1919	1574	1683	1653
FSCN1	ENSG00000075618	5965	5470	6280	3607	3582	2988	3519	3363	4340	4364	4138	4536
ACTB	ENSG00000075624	144879	135365	148717	28502	30228	24686	30401	34053	38177	67927	66549	70527
MOCOS	ENSG00000075643	18	19	30	3	11	6	4	4	6	8	11	14
PLD1	ENSG00000075651	49	51	52	577	684	653	509	463	554	378	399	420
ATP12A	ENSG00000075673	0	0	0	0	0	2	0	0	0	0	0	1
WDR62	ENSG00000075702	640	550	614	161	158	131	123	126	122	308	278	289
DLG1	ENSG00000075711	1310	1216	1143	719	922	780	1194	1189	1222	1074	1109	1048
RAB7A	ENSG00000075785	3854	3850	4060	1896	2033	1750	2334	2950	2943	2695	2944	2918
BCAP29	ENSG00000075790	622	591	529	358	483	397	611	677	691	530	584	539
SEC31B	ENSG00000075826	26	28	43	406	427	432	253	221	274	228	225	250
SART3	ENSG00000075856	1353	1271	1405	897	916	839	1038	1081	1206	1096	1089	1150
ARHGAP15	ENSG00000075884	0	0	0	3	0	2	4	4	5	2	1	2
TUBA3D	ENSG00000075886	12	12	10	6	5	7	11	9	10	10	9	9
PAX2	ENSG00000075891	69	62	67	63	72	61	60	64	74	64	66	67
EXOSC7	ENSG00000075914	470	446	481	479	497	425	622	514	714	524	486	540
KIFAP3	ENSG00000075945	721	691	684	549	650	572	886	739	962	719	693	739
MKRN2	ENSG00000075975	1012	996	897	536	627	546	668	662	859	739	762	767
MCM6	ENSG00000076003	2943	3197	3190	745	775	649	1083	841	1140	1590	1604	1660
REXO2	ENSG00000076043	1198	1147	1252	348	388	329	410	415	497	652	650	693
RBM7	ENSG00000076053	419	362	382	216	271	258	499	436	488	378	356	376
RBMS2	ENSG00000076067	1098	977	1058	673	810	717	929	892	1014	900	893	930
BAZ2A	ENSG00000076108	1388	1313	1497	1478	1676	1541	1620	1545	1642	1495	1511	1560
PTPN23	ENSG00000076201	1274	1030	1280	859	976	856	748	848	750	960	951	962
MLH1	ENSG00000076242	1136	1313	1380	564	602	498	693	690	835	798	868	904
UNG	ENSG00000076248	824	762	815	357	348	312	434	352	498	538	487	542
FMO4	ENSG00000076258	25	14	20	69	55	75	63	62	76	52	44	57
KLHL20	ENSG00000076321	341	311	303	306	426	381	476	453	511	374	397	398
RGS11	ENSG00000076344	7	9	10	44	34	33	18	21	21	23	21	21
SLC46A1	ENSG00000076351	303	296	308	460	487	418	442	352	446	402	378	391
PLXNA2	ENSG00000076356	2818	2568	2682	1984	2352	2120	2195	1875	2301	2332	2265	2368
SPAG5	ENSG00000076382	2209	2158	2310	477	529	400	521	619	625	1069	1102	1112
ANKRD13A	ENSG00000076513	882	807	792	728	941	825	955	1067	1184	855	938	934
TPD52	ENSG00000076554	57	38	52	27	31	30	108	101	103	64	57	62
ACACB	ENSG00000076555	126	103	131	237	284	229	354	284	353	239	224	238
TRAF4	ENSG00000076604	855	769	898	1032	1111	963	1046	874	1265	978	918	1042
PAG1	ENSG00000076641	382	302	310	468	611	531	712	577	701	521	497	514
GPATCH1	ENSG00000076650	197	201	226	191	245	172	260	276	293	216	241	230
ICAM3	ENSG00000076662	103	94	105	63	86	60	53	81	76	73	87	80
NT5C2	ENSG00000076685	1273	1274	1262	1536	1885	1670	1907	1914	2236	1572	1691	1723
MCAM	ENSG00000076706	1011	1045	1099	1131	1240	1098	895	1077	1124	1012	1121	1107
GPC4	ENSG00000076716	1685	1628	1675	2466	3015	2731	2240	2071	2599	2130	2238	2335
MBNL3	ENSG00000076770	294	297	232	91	144	160	295	334	351	227	258	248
CAMSAP3	ENSG00000076826	62	41	72	78	87	74	44	51	76	61	60	74
RAP1GAP	ENSG00000076864	35	26	44	24	34	26	43	47	46	34	36	39
XAB2	ENSG00000076924	802	682	840	557	536	457	459	492	580	606	570	626
ARHGEF1	ENSG00000076928	990	867	1023	561	583	545	455	346	483	669	599	684
STXBP2	ENSG00000076944	19	11	23	8	9	13	11	6	8	13	9	15
MAP2K7	ENSG00000076984	476	473	523	539	572	507	497	525	610	504	523	547
NMRK2	ENSG00000077009	6	11	9	110	113	77	105	82	113	74	69	66
DGKD	ENSG00000077044	551	490	538	827	875	853	925	686	985	768	684	792
CTTNBP2	ENSG00000077063	46	25	29	28	43	44	50	39	54	41	36	42
ACTL6B	ENSG00000077080	53	45	63	50	57	49	43	47	31	49	50	48
RARB	ENSG00000077092	154	119	150	302	452	393	555	510	576	337	360	373
TOP2B	ENSG00000077097	4475	4151	4032	2434	2907	2659	3841	4282	4420	3583	3780	3704
TM9SF3	ENSG00000077147	4617	3925	3361	1907	2770	2428	3600	2854	3723	3375	3183	3171
NFKB2	ENSG00000077150	391	305	379	292	300	262	255	291	308	313	299	316
UBE2T	ENSG00000077152	787	796	847	171	177	150	202	190	255	387	388	417
PPP1R12B	ENSG00000077157	245	212	201	955	1311	1228	1548	1330	1506	916	951	978
DNAJC10	ENSG00000077232	2853	2875	2382	1243	1647	1529	1826	1532	2020	1974	2018	1977
GTF3C1	ENSG00000077235	2644	2478	2619	2177	2403	2205	2228	2084	2363	2350	2322	2396
IL4R	ENSG00000077238	627	549	682	141	147	130	104	100	125	291	265	312
USP33	ENSG00000077254	1127	1010	861	587	825	731	1142	923	1104	952	919	899
PAK3	ENSG00000077264	281	209	213	270	375	333	471	411	491	341	332	346
CAPN6	ENSG00000077274	476	439	511	2158	2382	2162	3039	3599	3432	1891	2140	2035
DCX	ENSG00000077279	1623	1519	1387	3123	4121	3543	5789	5094	5924	3512	3578	3618
SNRPA	ENSG00000077312	1544	1652	1837	595	630	487	682	876	856	940	1053	1060
SPAG6	ENSG00000077327	0	0	1	53	70	61	157	122	176	70	64	79
EXOSC5	ENSG00000077348	179	168	202	95	75	69	85	77	103	120	107	125
DYNC1I2	ENSG00000077380	2399	2398	2472	1561	1729	1491	1977	2111	2614	1979	2079	2192
APBB1IP	ENSG00000077420	0	0	0	0	2	1	3	2	1	1	1	1
LRCH4	ENSG00000077454	449	390	506	635	616	583	460	520	521	515	509	537
FAM76B	ENSG00000077458	243	232	189	151	202	167	299	274	296	231	236	217
SIRT6	ENSG00000077463	218	176	219	212	160	139	134	121	181	188	152	180
TYR	ENSG00000077498	1	0	0	0	0	0	0	0	0	0	0	0
POLD3	ENSG00000077514	767	803	780	232	262	232	363	432	407	454	499	473
ACTN2	ENSG00000077522	612	535	620	14625	14917	13538	14158	14148	16706	9798	9867	10288
CAPZB	ENSG00000077549	4488	4425	4781	2819	3017	2453	2986	3430	3536	3431	3624	3590
GPR137B	ENSG00000077585	108	84	102	60	92	68	104	108	102	91	95	91
NAALAD2	ENSG00000077616	31	30	25	75	96	107	152	136	123	86	87	85
JADE1	ENSG00000077684	1070	929	899	428	578	503	644	617	747	714	708	716
SLC25A43	ENSG00000077713	257	219	213	109	140	87	113	109	135	160	156	145
UBE2A	ENSG00000077721	1057	1079	971	445	590	479	669	804	827	724	824	759
FGFR1	ENSG00000077782	3024	2827	3275	3501	3942	3408	3019	3179	3584	3181	3316	3422
FKBP6	ENSG00000077800	1	0	0	0	0	1	0	0	0	0	0	0
SMC1B	ENSG00000077935	6	4	2	5	5	4	1	0	4	4	3	3
FBLN1	ENSG00000077942	3165	2948	3546	8833	9309	7908	7243	7443	8461	6414	6567	6638
ITGA8	ENSG00000077943	92	73	72	119	144	137	243	231	241	151	149	150
CST7	ENSG00000077984	3	0	0	2	0	0	0	0	0	2	0	0
MAP2	ENSG00000078018	2594	2425	2118	1855	2357	2249	3218	3097	3155	2556	2626	2507
PIAS2	ENSG00000078043	536	519	472	438	550	504	748	592	777	574	554	584
AMPH	ENSG00000078053	281	280	250	423	426	418	353	347	401	352	351	356
ARAF	ENSG00000078061	643	610	739	595	576	491	447	484	534	562	557	588
MCCC1	ENSG00000078070	173	177	184	353	352	319	384	392	464	303	307	322
LAMP3	ENSG00000078081	7	6	10	5	16	12	9	21	5	7	14	9
FAP	ENSG00000078098	390	431	421	1041	1364	1135	1175	1166	1373	869	987	976
NEBL	ENSG00000078114	401	389	296	973	1367	1177	1559	1158	1737	978	971	1070
ACER3	ENSG00000078124	565	527	421	230	339	298	435	427	510	410	431	410
UBE2K	ENSG00000078140	2162	1961	1853	784	1064	915	1543	1369	1653	1496	1465	1474
PIK3C3	ENSG00000078142	648	640	535	656	740	697	998	871	1129	767	750	787
N4BP2	ENSG00000078177	610	513	469	313	429	440	667	600	725	530	514	545
TIGAR	ENSG00000078237	418	440	369	150	184	172	288	226	301	285	283	281
TULP3	ENSG00000078246	699	669	655	531	597	505	690	839	762	640	702	641
SYNJ2	ENSG00000078269	1792	1410	1552	519	597	523	607	561	742	973	856	939
ADCY2	ENSG00000078295	151	131	147	442	439	402	510	530	562	368	367	370
PPP2R5C	ENSG00000078304	1570	1672	1540	981	1201	971	1807	1546	2005	1453	1473	1505
PMS2P1	ENSG00000078319	97	82	75	55	79	59	53	85	75	68	82	70
RBFOX1	ENSG00000078328	193	176	149	705	869	718	1358	1381	1602	752	809	823
GNB1	ENSG00000078369	9796	9511	9841	3952	4344	3704	5050	4897	5722	6266	6251	6422
HOXA9	ENSG00000078399	371	388	338	312	361	285	341	450	465	341	400	363
EDN1	ENSG00000078401	145	160	125	9	3	10	11	4	12	55	56	49
MLLT10	ENSG00000078403	572	510	460	518	573	525	790	919	823	627	667	603
ZCWPW1	ENSG00000078487	65	53	55	72	72	71	79	59	93	72	61	73
ADCYAP1R1	ENSG00000078549	88	72	83	580	761	641	1234	944	1243	634	592	656
FGF20	ENSG00000078579	0	1	0	0	0	0	0	1	1	0	1	0
P2RY10	ENSG00000078589	1	0	0	0	0	0	0	2	0	0	1	0
ITM2A	ENSG00000078596	370	386	377	440	510	435	403	306	448	404	401	420
NRDC	ENSG00000078618	3688	3882	3638	2788	3199	3044	3187	3353	3818	3221	3478	3500
VDAC3	ENSG00000078668	2175	2387	2286	1389	1377	1283	1968	1528	2422	1844	1764	1997
PCM1	ENSG00000078674	3336	3131	2988	2126	2626	2693	3306	3669	3879	2923	3142	3187
TNRC6C	ENSG00000078687	414	358	419	687	836	738	837	874	943	646	689	700
CBFA2T2	ENSG00000078699	391	316	377	594	670	574	634	592	680	540	526	544
BRINP1	ENSG00000078725	66	70	81	182	231	165	223	235	244	157	179	163
ITCH	ENSG00000078747	1390	1325	1242	719	901	821	1294	1085	1210	1134	1104	1091
PKD2L2	ENSG00000078795	35	64	45	81	104	71	116	65	152	77	78	89
TP53INP2	ENSG00000078804	455	421	446	1646	1788	1536	1388	1665	1549	1163	1291	1177
SDF4	ENSG00000078808	2211	2077	2327	1777	1865	1571	1364	1454	1673	1784	1799	1857
MYH7B	ENSG00000078814	35	27	27	2763	2615	2612	1153	1116	1217	1317	1253	1285
BPIFB2	ENSG00000078898	0	0	0	0	0	0	0	0	0	0	0	0
TP73	ENSG00000078900	19	22	18	24	30	18	25	26	27	23	26	21
TOLLIP	ENSG00000078902	544	582	619	535	542	394	498	366	631	526	497	548
UBE2D4	ENSG00000078967	307	298	293	221	229	190	279	354	352	269	294	278
CLUL1	ENSG00000079101	10	12	16	15	16	15	15	23	22	13	17	18
RUNX1T1	ENSG00000079102	419	380	363	601	856	691	1092	1177	1065	704	804	706
CDH17	ENSG00000079112	3	3	4	1	4	5	1	2	3	2	3	4
THOC1	ENSG00000079134	691	695	604	515	656	554	727	789	866	644	713	675
FKBP7	ENSG00000079150	315	323	311	642	805	679	760	895	935	572	674	642
OSBPL6	ENSG00000079156	494	447	427	294	337	294	349	322	416	379	369	379
SLC1A3	ENSG00000079215	1075	971	1103	3745	4618	3932	5470	5144	6059	3430	3578	3698
XRCC5	ENSG00000079246	12206	12401	12084	4029	4628	4092	5783	5718	6536	7339	7582	7571
LXN	ENSG00000079257	87	125	113	157	212	197	198	225	246	147	187	185
SP140	ENSG00000079263	8	10	8	11	12	9	5	4	10	8	9	9
MKNK1	ENSG00000079277	252	212	251	384	443	356	375	319	420	337	325	342
TNS1	ENSG00000079308	2014	1768	2062	2432	2830	2523	2436	2320	2671	2294	2306	2419
REXO1	ENSG00000079313	954	803	1023	521	528	474	491	455	583	655	595	693
SAR1A	ENSG00000079332	2984	2918	2763	2331	2717	2241	3298	3284	3897	2871	2973	2967
CDC14A	ENSG00000079335	86	78	79	94	146	119	165	187	205	115	137	134
RAPGEF3	ENSG00000079337	49	44	45	56	52	41	32	45	44	46	47	43
CEACAM1	ENSG00000079385	11	7	8	4	7	7	3	1	3	6	5	6
SENP1	ENSG00000079387	683	644	602	213	328	273	335	433	418	410	468	431
DUSP13	ENSG00000079393	23	34	36	171	183	125	206	165	255	133	127	139
CIC	ENSG00000079432	1089	879	1118	1204	1320	1138	1031	999	1215	1108	1066	1157
LIPE	ENSG00000079435	73	79	89	69	76	70	72	82	87	71	79	82
FDFT1	ENSG00000079459	3500	3440	3826	2726	2892	2424	3562	3582	4600	3263	3305	3617
PAFAH1B3	ENSG00000079462	457	436	522	285	292	249	251	282	345	331	337	372
OPHN1	ENSG00000079482	158	142	132	444	532	472	551	489	636	384	388	413
AFM	ENSG00000079557	0	0	0	1	0	1	0	0	0	0	0	0
KIF22	ENSG00000079616	1579	1559	1637	425	452	390	465	513	559	823	841	862
SCGN	ENSG00000079689	0	1	0	0	0	0	0	0	2	0	0	1
CARMIL1	ENSG00000079691	92	73	79	51	76	56	86	103	110	76	84	82
PGM1	ENSG00000079739	952	930	1003	995	1106	948	1426	1152	1645	1124	1063	1199
DDX1	ENSG00000079785	3770	4047	3703	1935	2243	1940	2544	2557	3111	2750	2949	2918
DNM2	ENSG00000079805	2354	2224	2585	1624	1672	1435	1554	1447	1792	1844	1781	1937
EPB41L2	ENSG00000079819	2200	2106	2230	1093	1399	1269	1892	2009	1982	1728	1838	1827
RIMS1	ENSG00000079841	84	62	73	22	35	28	48	36	43	51	44	48
MOXD1	ENSG00000079931	277	302	305	357	411	325	449	443	424	361	385	351
STX7	ENSG00000079950	582	524	525	565	688	610	1141	877	1208	763	696	781
RABL2B	ENSG00000079974	210	201	237	191	213	162	210	151	238	204	188	212
KEAP1	ENSG00000079999	939	854	910	689	683	592	691	600	858	773	712	787
DDX43	ENSG00000080007	2	0	1	0	1	1	0	0	0	1	0	1
PTPRH	ENSG00000080031	15	16	20	73	53	63	75	83	91	54	51	58
DCT	ENSG00000080166	1	1	4	4	5	5	5	3	6	3	3	5
SLC35C2	ENSG00000080189	420	384	484	407	379	317	339	257	337	389	340	379
CRYBG3	ENSG00000080200	688	654	563	721	985	988	1273	1136	1328	894	925	960
EPHA6	ENSG00000080224	3	2	5	4	11	3	10	3	11	6	5	6
SCTR	ENSG00000080293	0	0	0	7	4	6	4	0	5	4	1	4
RFX3	ENSG00000080298	203	189	178	266	412	320	788	574	785	419	392	428
RIF1	ENSG00000080345	2391	2087	1788	1666	2123	2124	2462	2334	2711	2173	2181	2208
RAB21	ENSG00000080371	1102	1082	963	496	646	538	1020	857	1045	873	862	849
SLC4A4	ENSG00000080493	87	74	70	511	683	672	841	794	842	480	517	528
SMARCA2	ENSG00000080503	859	793	761	1060	1297	1144	1284	1386	1544	1068	1159	1150
RDH8	ENSG00000080511	1	0	1	0	0	0	0	0	0	0	0	0
SESN1	ENSG00000080546	254	238	251	492	565	450	762	607	838	503	470	513
MID2	ENSG00000080561	82	73	77	30	38	37	57	50	52	56	54	55
DNAAF6	ENSG00000080572	0	0	0	0	0	0	0	0	0	0	0	0
COL5A3	ENSG00000080573	1896	1673	1923	7929	8316	7549	5045	4711	5923	4957	4900	5132
SRCAP	ENSG00000080603	2402	1937	2367	1855	2162	1981	1973	2103	1977	2077	2067	2108
PUM3	ENSG00000080608	1471	1489	1384	547	632	553	654	851	887	891	991	941
CPB2	ENSG00000080618	0	1	0	1	1	2	3	5	5	1	2	2
CHRNA3	ENSG00000080644	50	52	40	199	220	198	115	121	150	121	131	129
KCNN2	ENSG00000080709	12	15	9	45	50	65	94	103	116	50	56	63
CNOT4	ENSG00000080802	382	388	374	422	465	407	565	822	647	456	558	476
PSEN1	ENSG00000080815	1051	994	1021	870	1045	892	956	1019	1146	959	1019	1020
CPOX	ENSG00000080819	607	649	665	312	407	343	501	388	511	473	481	506
CLDND1	ENSG00000080822	1137	1050	876	629	794	661	1054	975	1205	940	940	914
MOK	ENSG00000080823	113	120	99	132	185	157	184	196	216	143	167	157
HSP90AA1	ENSG00000080824	32093	33496	32046	9267	9873	8452	11947	13768	15243	17769	19046	18580
RBL1	ENSG00000080839	679	666	615	144	178	184	274	239	247	366	361	349
DLGAP4	ENSG00000080845	2282	2114	2378	1537	1564	1380	1312	1661	1636	1710	1780	1798
IGSF9B	ENSG00000080854	47	30	51	70	98	101	96	83	81	71	70	78
CFHR2	ENSG00000080910	0	0	0	0	0	0	0	0	0	0	0	0
CROCCP3	ENSG00000080947	99	70	94	221	293	249	234	220	265	185	194	203
NDC80	ENSG00000080986	1504	1550	1428	203	240	201	328	361	388	678	717	672
AP4E1	ENSG00000081014	458	425	336	143	207	165	294	238	297	298	290	266
RSBN1	ENSG00000081019	380	370	283	155	283	256	530	488	511	355	380	350
MAGI3	ENSG00000081026	502	416	444	326	443	429	564	577	567	464	479	480
CXCL2	ENSG00000081041	16	22	16	20	14	16	7	11	11	14	16	14
AFP	ENSG00000081051	6	6	1	0	0	0	2	2	1	3	3	1
COL4A4	ENSG00000081052	7	4	3	6	4	4	8	1	5	7	3	4
TCF7	ENSG00000081059	149	141	134	77	84	56	124	148	147	117	124	112
OSTM1	ENSG00000081087	249	283	229	360	484	363	519	460	557	376	409	383
CDH7	ENSG00000081138	3	11	4	38	42	43	64	62	64	35	38	37
IMPG2	ENSG00000081148	12	9	8	58	66	64	89	81	96	53	52	56
PCNP	ENSG00000081154	1801	1731	1561	690	873	795	1796	1481	1782	1429	1362	1379
EXD2	ENSG00000081177	383	391	388	369	428	389	429	384	518	394	401	432
ARG2	ENSG00000081181	446	515	480	282	301	238	409	327	467	379	381	395
MEF2C	ENSG00000081189	1077	934	930	6208	7895	6813	10671	11191	12333	5985	6673	6692
PTPRC	ENSG00000081237	2	0	2	3	0	2	1	2	3	2	1	2
CACNA1S	ENSG00000081248	187	155	181	2767	3174	3071	2035	1617	2159	1663	1649	1804
PKP1	ENSG00000081277	11	8	11	0	0	0	0	2	4	4	3	5
UBA5	ENSG00000081307	872	821	759	400	558	490	815	732	903	696	704	717
STK17B	ENSG00000081320	1035	1063	836	275	384	320	566	406	598	625	618	585
CDC14B	ENSG00000081377	386	386	349	447	594	498	643	577	778	492	519	542
ZNF510	ENSG00000081386	251	240	236	267	346	291	457	454	447	325	347	325
LRP2	ENSG00000081479	69	59	68	250	312	276	422	354	401	247	242	248
ZNF506	ENSG00000081665	218	199	231	253	367	340	471	487	558	314	351	376
JMJD4	ENSG00000081692	320	295	351	199	171	185	194	146	230	238	204	255
DUSP12	ENSG00000081721	542	512	518	241	284	237	338	296	410	374	364	388
AACS	ENSG00000081760	343	330	332	997	963	900	1231	897	1426	857	730	886
DELE1	ENSG00000081791	506	528	497	908	1022	833	962	856	1086	792	802	805
SLC13A1	ENSG00000081800	0	0	0	0	0	0	0	0	0	0	0	0
CADPS2	ENSG00000081803	59	78	47	225	261	262	243	192	296	176	177	202
PCDHB4	ENSG00000081818	15	7	6	19	22	26	30	33	36	21	21	23
PCDHA6	ENSG00000081842	342	333	295	646	895	697	875	1008	1067	621	745	686
PCDHGA2	ENSG00000081853	1608	1477	1836	3001	3214	2678	2322	2663	2829	2310	2451	2448
HSPB11	ENSG00000081870	431	441	410	202	261	214	290	307	363	308	336	329
PHLPP1	ENSG00000081913	411	383	392	335	344	332	503	468	571	416	398	432
ATP8B1	ENSG00000081923	489	456	441	35	43	41	49	34	86	191	178	189
IL12RB2	ENSG00000081985	9	9	6	2	9	6	4	4	5	5	7	6
SMARCD3	ENSG00000082014	529	558	627	1762	1601	1533	1359	1305	1540	1217	1155	1233
WDR70	ENSG00000082068	514	491	497	400	436	374	420	514	556	445	480	476
FYB1	ENSG00000082074	5	3	5	3	3	4	1	4	4	3	3	4
MPP4	ENSG00000082126	234	192	209	8	4	6	9	3	7	84	66	74
STRADB	ENSG00000082146	564	549	506	460	523	509	961	912	1186	662	661	734
BZW1	ENSG00000082153	5622	5574	4918	1060	1268	1123	1774	1657	2085	2819	2833	2709
PGR	ENSG00000082175	0	1	0	0	0	0	0	2	0	0	1	0
C1QTNF3	ENSG00000082196	76	70	78	145	143	163	282	280	337	168	164	193
ME2	ENSG00000082212	1114	1099	1036	399	490	440	626	635	697	713	741	724
C5orf22	ENSG00000082213	674	610	597	287	340	278	477	452	489	479	467	455
CCNT2	ENSG00000082258	756	643	600	721	973	827	1213	1211	1344	897	942	924
FAM135A	ENSG00000082269	180	139	134	150	224	199	334	269	344	221	211	226
COL19A1	ENSG00000082293	92	88	77	95	150	195	220	183	217	136	140	163
EPB41L3	ENSG00000082397	1555	1460	1304	3557	4446	3681	5151	6020	6083	3421	3975	3689
COBLL1	ENSG00000082438	156	132	121	286	363	366	342	357	356	261	284	281
DLG3	ENSG00000082458	387	366	415	262	294	246	296	278	339	315	313	333
KCNK2	ENSG00000082482	549	543	525	158	178	151	288	304	334	332	342	337
SERTAD4	ENSG00000082497	835	799	779	52	62	69	86	60	96	324	307	315
TRAF5	ENSG00000082512	317	257	284	734	1021	876	926	854	1021	659	711	727
MRPL22	ENSG00000082515	521	586	541	285	293	239	355	359	403	387	413	394
GEMIN5	ENSG00000082516	1309	1260	1315	819	813	780	972	875	1089	1033	983	1061
OPRK1	ENSG00000082556	34	23	29	82	103	103	93	75	93	70	67	75
NFE2L1	ENSG00000082641	5308	5002	5554	7006	7759	6930	6064	6779	7242	6126	6513	6575
SEMA5B	ENSG00000082684	88	101	110	296	344	268	362	318	357	249	254	245
GSK3B	ENSG00000082701	1834	1728	1661	1227	1612	1475	2190	1997	2135	1750	1779	1757
ITGB5	ENSG00000082781	3972	3810	4100	521	597	439	435	384	505	1643	1597	1681
ERC1	ENSG00000082805	1667	1460	1557	1144	1420	1270	1422	1574	1617	1411	1485	1481
XPO1	ENSG00000082898	7380	6636	5666	2161	3172	2703	4586	3983	4984	4709	4597	4451
LINC01587	ENSG00000082929	1	1	0	3	3	2	1	0	5	2	1	2
RNF13	ENSG00000082996	236	225	210	232	275	239	351	363	425	273	288	291
TRPM3	ENSG00000083067	20	15	24	20	29	15	37	35	43	26	26	27
PALB2	ENSG00000083093	404	397	375	217	235	200	286	277	353	302	303	309
DOP1A	ENSG00000083097	760	682	643	773	1031	965	1091	1023	1260	875	912	956
LYRM2	ENSG00000083099	950	887	843	633	777	626	1155	1022	1253	913	895	907
BCKDHB	ENSG00000083123	289	332	320	303	363	282	423	349	459	338	348	354
KAT6A	ENSG00000083168	1909	1725	1763	1099	1400	1268	1894	1939	1753	1634	1688	1595
TUT7	ENSG00000083223	573	520	506	391	471	466	614	610	620	526	534	531
ULK2	ENSG00000083290	452	398	404	353	408	349	549	463	520	451	423	424
GRHL2	ENSG00000083307	1	0	1	8	8	12	11	6	9	7	5	7
TNPO1	ENSG00000083312	6052	5497	4704	2202	3171	2865	5919	4758	6123	4724	4475	4564
PLOD1	ENSG00000083444	3939	3706	4639	7017	7364	6380	5574	5330	6646	5510	5467	5888
P2RX5	ENSG00000083454	36	17	40	591	638	566	425	378	491	351	344	366
ITGAE	ENSG00000083457	253	319	264	192	197	175	225	135	249	223	217	229
DIS3	ENSG00000083520	1941	1867	1652	777	1088	1005	1399	1462	1599	1372	1472	1419
PIBF1	ENSG00000083535	397	385	364	232	289	254	396	419	485	342	364	368
TDRD3	ENSG00000083544	345	326	315	237	277	254	410	497	485	331	367	351
	ENSG00000083622	0	0	0	0	0	0	0	0	0	0	0	0
NUFIP1	ENSG00000083635	382	390	359	106	139	129	228	241	251	239	257	246
PDS5B	ENSG00000083642	1309	1092	1071	880	1127	998	1644	2040	1838	1278	1420	1302
OXCT1	ENSG00000083720	1438	1431	1338	306	372	318	436	414	464	727	739	707
RRAGB	ENSG00000083750	119	117	112	179	241	233	255	240	335	184	199	227
EPYC	ENSG00000083782	5	12	6	2	1	0	0	1	0	2	5	2
CYLD	ENSG00000083799	331	343	295	325	357	391	523	411	541	393	370	409
SLC27A5	ENSG00000083807	120	87	109	127	136	109	118	93	126	122	105	115
ZNF324	ENSG00000083812	198	166	190	184	188	203	190	160	215	191	171	203
ZNF671	ENSG00000083814	102	103	115	183	205	158	192	179	225	159	162	166
ZNF416	ENSG00000083817	105	103	104	100	102	86	142	95	151	116	100	114
ZNF586	ENSG00000083828	147	142	175	123	179	144	193	161	181	154	161	167
ZNF446	ENSG00000083838	148	106	134	186	228	174	171	142	204	168	159	171
ZNF264	ENSG00000083844	483	440	448	402	558	476	688	579	749	524	526	558
RPS5	ENSG00000083845	7466	7733	8029	7514	7204	5978	8669	8231	10972	7883	7723	8326
FAT1	ENSG00000083857	8975	7325	7387	4667	6112	6108	5547	4298	5207	6396	5912	6234
YTHDC1	ENSG00000083896	1447	1386	1373	1113	1326	1171	1473	1763	1801	1344	1492	1448
CHMP2B	ENSG00000083937	418	416	315	184	234	175	399	369	468	334	340	319
SMAP2	ENSG00000084070	984	919	1054	599	656	561	716	891	891	766	822	835
PPIE	ENSG00000084072	537	523	574	340	337	308	405	345	467	427	402	450
ZMPSTE24	ENSG00000084073	1282	1069	932	451	746	633	907	686	902	880	834	822
STARD7	ENSG00000084090	2851	2800	2820	2199	2405	2114	3167	2866	3542	2739	2690	2825
NOA1	ENSG00000084092	360	359	400	417	465	379	557	607	633	445	477	471
REST	ENSG00000084093	1234	1065	979	566	740	750	1271	1156	1363	1024	987	1031
HAL	ENSG00000084110	3	0	0	3	1	1	0	6	3	2	2	1
SSH1	ENSG00000084112	1640	1448	1497	610	729	677	901	775	899	1050	984	1024
GSTP1	ENSG00000084207	4579	4455	5064	2126	2295	1818	2270	2492	2867	2992	3081	3250
APLP2	ENSG00000084234	6707	6474	6721	5320	5977	5285	4870	5323	5547	5632	5925	5851
FAM234B	ENSG00000084444	249	193	206	371	384	339	365	269	371	328	282	305
SLCO1A2	ENSG00000084453	4	2	2	5	4	1	3	4	5	4	3	3
WBP11	ENSG00000084463	2809	2558	2956	914	1083	920	1247	1801	1526	1657	1814	1801
EIF3I	ENSG00000084623	3604	3796	4001	1918	1897	1637	2010	1864	2563	2511	2519	2734
NKAIN1	ENSG00000084628	285	230	267	207	238	175	279	362	314	257	277	252
COL16A1	ENSG00000084636	1662	1463	1788	3800	3719	3444	2246	1856	2601	2569	2346	2611
TXLNA	ENSG00000084652	2505	2336	2495	1564	1673	1507	1477	1357	1551	1849	1789	1851
APOB	ENSG00000084674	5	3	5	2	2	8	4	3	6	4	3	6
NCOA1	ENSG00000084676	906	849	923	3320	3804	3491	4675	5455	5106	2967	3369	3173
AGBL5	ENSG00000084693	952	1033	1167	905	1017	783	1134	1473	1466	997	1174	1139
EFR3B	ENSG00000084710	471	447	478	310	340	290	368	305	401	383	364	390
KIF3C	ENSG00000084731	716	724	756	740	821	714	740	822	878	732	789	783
RAB10	ENSG00000084733	2235	2194	2069	1143	1623	1351	2370	2568	2692	1916	2128	2037
GCKR	ENSG00000084734	2	1	1	0	3	2	3	3	2	2	2	2
HADHA	ENSG00000084754	3733	3659	3855	3873	3935	3505	4214	4318	5279	3940	3971	4213
MAPRE3	ENSG00000084764	202	183	210	727	729	625	687	645	780	539	519	538
CAD	ENSG00000084774	2768	2442	2782	1283	1396	1259	1161	950	1317	1737	1596	1786
CD59	ENSG00000085063	9638	9338	8642	1973	2107	1802	2048	1680	2443	4553	4375	4296
CD82	ENSG00000085117	499	408	528	413	497	364	543	445	578	485	450	490
BCORL1	ENSG00000085185	288	292	325	416	499	450	495	607	617	400	466	464
ATRX	ENSG00000085224	1741	1578	1421	1722	2362	2379	3258	3496	3865	2240	2479	2555
AK6	ENSG00000085231	545	605	511	187	238	204	309	311	390	347	385	368
FCN1	ENSG00000085265	0	0	1	0	0	0	0	0	0	0	0	0
MYNN	ENSG00000085274	387	349	356	246	316	291	456	394	523	363	353	390
MECOM	ENSG00000085276	170	164	165	89	109	104	98	87	72	119	120	114
SCAMP1	ENSG00000085365	448	370	302	356	414	394	930	772	1045	578	519	580
PREP	ENSG00000085377	1054	1035	1064	840	925	720	982	847	1161	959	936	982
HACE1	ENSG00000085382	272	256	210	142	172	157	270	171	295	228	200	221
SEH1L	ENSG00000085415	1373	1336	1259	340	470	386	632	511	738	782	772	794
WDR47	ENSG00000085433	442	442	420	305	409	297	464	415	520	404	422	412
WDFY1	ENSG00000085449	1319	1245	1072	498	687	584	954	929	1015	924	954	890
OVGP1	ENSG00000085465	12	16	13	45	54	38	19	16	27	25	29	26
SLC25A24	ENSG00000085491	1808	1698	1376	656	891	801	1438	1279	1527	1301	1289	1235
MAP3K4	ENSG00000085511	547	526	569	426	483	394	502	515	578	492	508	514
PILRA	ENSG00000085514	32	21	44	89	80	77	42	48	58	54	50	60
IGSF9	ENSG00000085552	56	41	51	91	90	68	68	51	103	72	61	74
ABCB1	ENSG00000085563	10	5	4	7	8	6	9	4	11	9	6	7
ZNF213	ENSG00000085644	252	212	243	165	179	154	145	200	198	187	197	198
AKR1B1	ENSG00000085662	1218	1276	1298	1132	1111	931	1368	1069	1655	1239	1152	1295
CPNE3	ENSG00000085719	1264	1234	1120	685	942	792	1403	1170	1484	1117	1115	1132
RRN3	ENSG00000085721	839	843	846	530	646	514	822	640	936	730	710	765
CTTN	ENSG00000085733	4216	3896	4149	2776	2860	2644	2331	2238	2769	3108	2998	3187
WNT11	ENSG00000085741	2	2	5	176	143	143	147	121	132	108	89	93
MTIF2	ENSG00000085760	812	830	680	451	459	424	623	691	745	629	660	616
DDHD2	ENSG00000085788	897	894	726	525	671	592	930	716	1018	784	760	779
TTC39A	ENSG00000085831	11	7	9	12	12	11	14	12	14	12	10	11
EPS15	ENSG00000085832	1257	1142	1052	746	919	755	1303	1268	1486	1102	1110	1098
ORC1	ENSG00000085840	812	728	810	117	123	108	168	186	193	366	346	370
MGST2	ENSG00000085871	68	82	77	259	285	224	256	287	375	194	218	225
CHERP	ENSG00000085872	1524	1237	1612	857	991	819	864	945	1012	1082	1058	1148
ATG16L1	ENSG00000085978	399	421	387	350	397	339	377	330	396	375	383	374
USP40	ENSG00000085982	717	705	702	657	804	714	900	745	909	758	751	775
POMGNT1	ENSG00000085998	1072	977	1087	1128	1181	994	832	704	976	1011	954	1019
RAD54L	ENSG00000085999	538	582	597	199	231	181	211	196	226	316	336	335
MAST2	ENSG00000086015	1216	1144	1170	1402	1523	1344	1224	1176	1340	1281	1281	1285
DNAJA1	ENSG00000086061	4801	5056	4956	2443	2871	2297	3476	3754	4046	3573	3894	3766
B4GALT1	ENSG00000086062	1667	1547	1541	693	854	791	798	779	898	1053	1060	1077
CHMP5	ENSG00000086065	935	970	881	499	535	496	818	817	946	751	774	774
NFX1	ENSG00000086102	1228	1284	1218	717	873	749	922	862	1011	956	1006	993
AQP6	ENSG00000086159	4	5	4	5	3	4	5	0	5	5	3	4
DIMT1	ENSG00000086189	871	816	777	402	503	409	732	735	857	668	685	681
IPO11	ENSG00000086200	1144	1109	954	243	317	299	536	432	542	641	619	598
FOLH1	ENSG00000086205	0	0	0	0	0	3	0	0	0	0	0	1
EIF2AK1	ENSG00000086232	2423	2400	2526	1766	1828	1593	2229	2459	2557	2139	2229	2225
NME8	ENSG00000086288	1	1	0	0	1	2	1	2	1	1	1	1
EPDR1	ENSG00000086289	343	364	395	736	864	709	728	643	817	602	624	640
SNX10	ENSG00000086300	33	38	25	8	12	14	26	22	17	22	24	19
SEPHS1	ENSG00000086475	1388	1518	1522	641	718	622	988	906	1142	1006	1047	1095
MRPL28	ENSG00000086504	737	771	824	405	414	306	407	393	470	516	526	533
HBQ1	ENSG00000086506	1	2	2	2	1	0	1	0	3	1	1	2
ITPKC	ENSG00000086544	202	165	195	279	297	254	288	241	323	256	234	257
CEACAM6	ENSG00000086548	0	0	0	0	0	0	3	1	2	1	0	1
FAT2	ENSG00000086570	16	19	15	13	30	20	28	20	15	19	23	17
RBM22	ENSG00000086589	1058	1051	1088	563	658	514	686	724	749	769	811	784
TMED2	ENSG00000086598	5145	4871	4591	2446	3151	2461	3529	3448	4141	3707	3823	3731
ERO1B	ENSG00000086619	88	43	54	50	80	61	68	42	83	69	55	66
ZFAND6	ENSG00000086666	619	597	525	469	623	466	943	926	1144	677	715	712
HSD17B2	ENSG00000086696	5	3	5	5	10	6	11	2	6	7	5	6
TXLNG	ENSG00000086712	554	543	486	231	317	278	422	430	486	402	430	417
PPEF1	ENSG00000086717	12	8	7	9	9	8	3	3	7	8	7	7
LAT2	ENSG00000086730	28	29	33	30	45	36	20	29	35	26	34	35
HUWE1	ENSG00000086758	7185	6200	6730	4990	6196	5932	5967	5508	5643	6047	5968	6102
ZW10	ENSG00000086827	899	831	778	276	370	308	419	444	510	531	548	532
ALG9	ENSG00000086848	726	683	702	443	551	489	608	548	724	592	594	638
MYBPC2	ENSG00000086967	38	36	39	1380	1293	1310	1244	1209	1473	887	846	941
NOX4	ENSG00000086991	63	63	66	8	14	13	13	6	10	28	28	30
ACOX3	ENSG00000087008	328	335	329	271	313	281	342	263	426	314	304	345
MTMR2	ENSG00000087053	1360	1323	1262	506	617	559	806	883	1006	891	941	942
PPP1R15A	ENSG00000087074	1052	1094	1049	657	657	529	603	879	775	771	877	784
HSD17B14	ENSG00000087076	36	27	42	28	40	26	27	21	21	30	29	30
TRIP6	ENSG00000087077	988	928	1057	547	630	499	490	368	584	675	642	713
ACHE	ENSG00000087085	65	72	78	495	451	391	449	448	533	336	324	334
FTL	ENSG00000087086	9595	9471	11019	4996	5014	4227	4473	4878	5959	6355	6454	7068
SRRT	ENSG00000087087	2545	2387	2768	1732	1914	1636	1614	2098	1901	1964	2133	2102
BAX	ENSG00000087088	1095	1007	1164	485	468	376	396	341	507	659	605	682
NLK	ENSG00000087095	270	215	239	214	261	221	322	325	379	269	267	280
PIGS	ENSG00000087111	720	710	828	974	999	855	727	817	881	807	842	855
ADAMTS2	ENSG00000087116	938	838	966	1417	1476	1440	971	899	1107	1109	1071	1171
TMPRSS11E	ENSG00000087128	0	0	0	0	0	0	0	0	0	0	0	0
ATXN7L3	ENSG00000087152	1319	1178	1389	1086	1103	984	1176	913	1298	1194	1065	1224
PGS1	ENSG00000087157	346	336	349	358	386	340	398	274	395	367	332	361
PSMC5	ENSG00000087191	2508	2606	2799	1552	1613	1281	1519	1568	1865	1860	1929	1982
UIMC1	ENSG00000087206	478	506	516	332	301	308	355	365	471	388	391	432
CETP	ENSG00000087237	0	1	0	0	0	0	0	0	0	0	0	0
MMP2	ENSG00000087245	1040	919	1162	6830	7275	6409	4508	5030	5443	4126	4408	4338
MT3	ENSG00000087250	1	1	0	15	15	12	49	41	51	22	19	21
LPCAT2	ENSG00000087253	157	118	117	57	68	62	87	84	106	100	90	95
GNAO1	ENSG00000087258	276	216	252	317	348	324	455	513	482	349	359	353
OGFOD1	ENSG00000087263	1708	1775	1735	829	937	780	995	1150	1185	1177	1287	1233
SH3BP2	ENSG00000087266	798	705	754	771	917	800	769	587	827	779	736	794
NOP14	ENSG00000087269	1775	1810	1917	859	911	843	969	1275	1234	1201	1332	1331
ADD1	ENSG00000087274	4494	4324	4642	3624	3786	3350	4123	3992	4557	4080	4034	4183
L2HGDH	ENSG00000087299	218	187	168	123	140	146	229	167	238	190	165	184
TXNDC16	ENSG00000087301	213	195	158	143	227	208	292	237	308	216	220	225
RTRAF	ENSG00000087302	2968	2989	2951	3013	3359	2815	3496	3520	4117	3159	3289	3294
NID2	ENSG00000087303	2829	2464	2821	5815	7082	6025	5237	4916	5946	4627	4821	4931
GMCL1	ENSG00000087338	215	173	159	113	203	155	251	252	317	193	209	210
SF3B2	ENSG00000087365	5603	5322	6131	3063	3222	2717	3089	3719	3899	3918	4088	4249
KLHL42	ENSG00000087448	731	677	600	401	532	446	637	490	609	590	566	552
GNAS	ENSG00000087460	14324	13674	14828	31681	31820	27922	26709	28824	32423	24238	24773	25058
DNM1L	ENSG00000087470	2160	2101	1886	1118	1491	1276	1837	2002	2165	1705	1865	1776
PTHLH	ENSG00000087494	28	20	19	3	3	1	2	2	4	11	8	8
PHACTR3	ENSG00000087495	1	1	0	15	10	7	26	32	35	14	14	14
ERGIC2	ENSG00000087502	1001	981	827	442	615	541	814	906	899	752	834	756
TFAP2C	ENSG00000087510	22	20	13	3	2	2	2	1	2	9	8	6
AURKA	ENSG00000087586	2023	2146	2158	228	268	212	335	326	445	862	913	938
CASS4	ENSG00000087589	140	144	153	216	295	226	362	344	311	239	261	230
PIR	ENSG00000087842	97	84	91	99	92	81	127	143	161	108	106	111
AAMDC	ENSG00000087884	148	148	151	129	147	105	136	150	158	138	148	138
RFX2	ENSG00000087903	147	128	143	95	90	75	113	98	123	118	105	114
METTL2A	ENSG00000087995	442	464	487	264	289	261	383	315	435	363	356	394
SULT2B1	ENSG00000088002	1	1	4	4	2	2	4	0	1	3	1	2
ALG6	ENSG00000088035	189	217	135	103	194	146	216	158	245	169	190	175
CNOT3	ENSG00000088038	957	885	1113	695	753	632	695	1017	801	782	885	849
GP6	ENSG00000088053	4	2	6	2	2	1	1	1	3	2	2	3
PTPN4	ENSG00000088179	184	171	143	174	237	195	470	385	431	276	264	256
DDX18	ENSG00000088205	3076	3197	2650	851	1077	958	1467	1366	1650	1798	1880	1753
KHSRP	ENSG00000088247	7007	6340	7237	2936	3203	2715	3564	4029	4063	4502	4524	4672
GNA11	ENSG00000088256	1926	1670	2050	1149	1088	997	1111	1041	1405	1395	1266	1484
ASAP3	ENSG00000088280	428	428	482	1269	1352	1179	1166	1022	1271	954	934	977
EDEM2	ENSG00000088298	231	197	227	246	213	204	185	188	256	221	199	229
DNMT3B	ENSG00000088305	153	147	163	197	234	222	292	259	273	214	213	219
REM1	ENSG00000088320	3	4	3	29	35	33	25	35	37	19	25	24
TPX2	ENSG00000088325	12284	12256	12612	1878	2162	1762	2642	3198	2979	5601	5872	5784
FER1L4	ENSG00000088340	9	4	11	878	902	875	494	355	563	460	420	483
PDRG1	ENSG00000088356	292	248	287	241	262	179	300	236	336	278	249	267
EPB41L1	ENSG00000088367	803	670	788	513	631	482	559	644	616	625	648	629
SLC15A1	ENSG00000088386	10	10	7	0	1	1	4	0	1	5	4	3
DOCK9	ENSG00000088387	734	689	669	700	974	795	1158	1014	1280	864	892	915
ANKRD10	ENSG00000088448	673	601	543	1121	1379	1234	1555	1128	1616	1116	1036	1131
TGDS	ENSG00000088451	194	155	145	108	130	102	162	122	179	155	136	142
DOCK3	ENSG00000088538	146	125	135	173	197	169	228	162	180	182	161	161
C3orf18	ENSG00000088543	90	71	98	133	134	117	152	111	170	125	105	128
COQ9	ENSG00000088682	477	474	530	615	658	601	698	844	830	597	659	654
TMEM40	ENSG00000088726	0	1	4	18	13	16	32	30	33	17	15	18
KIF9	ENSG00000088727	102	113	122	79	95	70	101	86	126	94	98	106
ARHGAP28	ENSG00000088756	243	219	249	877	1223	1096	1909	1664	2000	1010	1035	1115
CRLS1	ENSG00000088766	534	531	422	325	371	285	571	519	617	477	474	441
DEFB127	ENSG00000088782	0	0	0	0	0	0	0	0	0	0	0	0
PPP1R13B	ENSG00000088808	102	106	125	131	161	135	134	190	176	122	152	145
ATRN	ENSG00000088812	1490	1330	1421	1183	1524	1400	1350	1286	1453	1341	1380	1425
SMOX	ENSG00000088826	256	195	272	205	242	208	238	237	288	233	225	256
SIGLEC1	ENSG00000088827	0	0	1	5	6	4	0	3	6	2	3	4
FKBP1A	ENSG00000088832	3807	3677	3913	2026	2301	1834	2449	2341	3033	2761	2773	2927
NSFL1C	ENSG00000088833	1326	1288	1470	844	950	748	924	1322	1207	1031	1187	1142
SLC4A11	ENSG00000088836	20	11	33	29	25	23	15	13	16	21	16	24
C20orf194	ENSG00000088854	514	432	414	666	718	741	829	590	853	670	580	669
ZNF343	ENSG00000088876	209	165	210	213	211	208	273	236	273	232	204	230
EBF4	ENSG00000088881	20	16	23	68	62	59	53	54	81	47	44	54
CPXM1	ENSG00000088882	610	495	647	2506	2758	2429	2136	2089	2544	1751	1781	1873
MAVS	ENSG00000088888	2431	2258	2453	2780	3070	2647	2877	2820	3132	2696	2716	2744
LZTS3	ENSG00000088899	85	71	83	169	164	154	160	152	178	138	129	138
F11	ENSG00000088926	0	0	0	1	0	0	0	1	1	0	0	0
XRN2	ENSG00000088930	2807	2885	2772	1398	1573	1426	1980	2087	2286	2062	2182	2161
KIZ	ENSG00000088970	154	140	159	186	211	189	191	265	256	177	205	201
DYNLL1	ENSG00000088986	3173	3290	3388	1825	2031	1618	2239	2525	2800	2412	2615	2602
TESC	ENSG00000088992	4	4	9	8	3	8	3	1	3	5	3	7
SNX5	ENSG00000089006	3314	3118	3056	1194	1552	1281	1674	1476	1927	2061	2049	2088
RPL6	ENSG00000089009	8189	8667	9026	8198	8136	6708	11418	12418	14640	9268	9740	10125
SIRPG	ENSG00000089012	0	0	0	1	3	0	0	1	1	0	1	0
MAPKAPK5	ENSG00000089022	659	626	652	366	376	355	447	424	486	491	475	498
P2RX7	ENSG00000089041	3	9	6	7	9	6	8	10	8	6	9	7
ESF1	ENSG00000089048	946	868	863	467	580	520	702	959	950	705	802	778
RBBP9	ENSG00000089050	551	523	504	265	384	295	484	531	606	433	479	468
ANAPC5	ENSG00000089053	2137	2079	1990	2116	2332	2147	1909	1554	2211	2054	1988	2116
SLC23A2	ENSG00000089057	625	606	573	641	709	664	689	640	675	652	652	637
SLC8B1	ENSG00000089060	160	137	137	256	238	215	171	144	194	196	173	182
TMEM230	ENSG00000089063	809	841	772	681	784	648	1160	837	1271	883	821	897
DZANK1	ENSG00000089091	44	37	49	45	64	64	78	57	91	56	53	68
KDM2B	ENSG00000089094	692	645	709	333	397	346	466	453	553	497	498	536
CFAP61	ENSG00000089101	4	9	7	16	14	12	33	34	33	18	19	17
LHX5	ENSG00000089116	34	21	31	11	23	17	26	16	29	24	20	26
TASP1	ENSG00000089123	85	85	90	82	65	62	115	88	120	94	79	91
OAS1	ENSG00000089127	8	12	10	31	124	44	60	63	56	33	66	37
GCN1	ENSG00000089154	3485	3141	3416	2714	2827	2703	2337	1972	2592	2845	2647	2904
RPLP0	ENSG00000089157	13665	14209	15274	13584	13881	11311	16480	14091	21388	14576	14060	15991
PXN	ENSG00000089159	3993	3632	4033	2994	3097	2872	2626	2467	2961	3204	3065	3289
SIRT4	ENSG00000089163	9	6	14	24	28	24	39	17	37	24	17	25
RPH3A	ENSG00000089169	9	9	4	7	6	3	1	6	1	6	7	3
KIF16B	ENSG00000089177	223	192	236	320	320	303	477	460	519	340	324	353
TRMT6	ENSG00000089195	950	886	856	244	321	245	377	492	434	524	566	512
CHGB	ENSG00000089199	152	155	140	147	186	155	157	225	184	152	189	160
PEBP1	ENSG00000089220	2575	2566	2705	2167	2089	1912	2652	2626	3401	2465	2427	2673
TBX5	ENSG00000089225	1	0	1	2	4	3	4	7	3	2	4	2
BRAP	ENSG00000089234	513	452	509	331	380	305	429	440	492	424	424	435
ERP29	ENSG00000089248	1198	1215	1377	1138	1129	951	1005	1403	1300	1114	1249	1209
NOS1	ENSG00000089250	5	1	5	1	2	3	1	5	1	2	3	3
FUS	ENSG00000089280	9433	8995	9973	5311	6063	5302	5793	6073	6772	6846	7044	7349
IGBP1	ENSG00000089289	433	482	448	886	810	749	1116	1257	1421	812	850	873
FXYD5	ENSG00000089327	1127	1091	1391	86	105	80	51	87	69	421	428	513
ZNF302	ENSG00000089335	444	435	435	635	800	669	1051	1165	1255	710	800	786
GRAMD1A	ENSG00000089351	544	491	602	780	812	677	603	614	715	642	639	665
FXYD3	ENSG00000089356	0	0	0	0	0	0	1	1	1	0	0	0
HEPH	ENSG00000089472	334	321	357	590	647	630	581	491	643	502	486	543
CDIP1	ENSG00000089486	619	630	728	421	409	385	403	317	477	481	452	530
CMTM1	ENSG00000089505	19	19	23	23	30	33	33	37	38	25	29	31
KCNH4	ENSG00000089558	2	0	1	2	0	3	1	1	0	2	0	1
GANAB	ENSG00000089597	7396	7168	7923	6414	7074	6187	5242	4408	5864	6351	6217	6658
GMIP	ENSG00000089639	138	141	152	219	243	214	142	135	188	166	173	185
RBM41	ENSG00000089682	155	179	186	153	207	209	234	265	285	181	217	227
BIRC5	ENSG00000089685	2333	2371	2505	385	483	367	624	688	775	1114	1181	1216
LAG3	ENSG00000089692	5	4	11	9	10	11	10	6	10	8	7	11
MLF2	ENSG00000089693	2732	2657	3124	1968	2120	1727	2182	3196	2832	2294	2658	2561
OTUB2	ENSG00000089723	52	74	57	50	75	47	74	66	81	59	72	62
DDX24	ENSG00000089737	3168	3262	3537	2056	2202	1835	2386	2742	2914	2537	2735	2762
ZBTB25	ENSG00000089775	543	529	538	258	275	247	391	323	403	397	376	396
NECAP1	ENSG00000089818	696	601	598	414	449	424	535	510	619	548	520	547
ARHGAP4	ENSG00000089820	654	678	790	323	386	268	329	459	466	435	508	508
ANKRD24	ENSG00000089847	7	10	7	26	15	22	18	20	27	17	15	19
DHX32	ENSG00000089876	618	618	537	351	406	388	692	572	739	554	532	555
RCOR1	ENSG00000089902	791	720	739	666	853	749	1025	912	1111	827	828	866
GPATCH2L	ENSG00000089916	1060	974	861	857	1088	1083	1602	1345	1561	1173	1136	1168
LTBP4	ENSG00000090006	423	364	482	1104	1188	1037	1138	1119	1432	888	890	984
BLVRB	ENSG00000090013	150	164	164	117	154	124	122	131	143	130	150	144
SLC9A1	ENSG00000090020	808	678	835	368	404	350	295	341	314	490	474	500
SPTLC1	ENSG00000090054	949	927	921	571	759	653	745	791	866	755	826	813
PAPOLA	ENSG00000090060	4705	4417	4043	1468	1964	1605	3069	3159	3620	3081	3180	3089
CCNK	ENSG00000090061	1820	1796	1887	848	1028	757	1105	1474	1256	1258	1433	1300
PCBP4	ENSG00000090097	902	891	1106	1763	1947	1644	1994	2191	2539	1553	1676	1763
RGS1	ENSG00000090104	0	1	2	0	1	5	4	9	6	1	4	4
YPEL3	ENSG00000090238	63	58	49	203	193	149	175	166	195	147	139	131
MRPS33	ENSG00000090263	378	377	380	274	276	258	436	398	474	363	350	371
NDUFB2	ENSG00000090266	743	741	742	515	611	498	614	489	756	624	614	665
NUDC	ENSG00000090273	3671	3715	4117	1126	1241	949	1087	1538	1458	1961	2165	2175
MAEA	ENSG00000090316	1089	1014	1058	710	829	693	763	775	845	854	873	865
ICAM1	ENSG00000090339	97	86	115	55	69	58	97	87	98	83	81	90
STRN4	ENSG00000090372	1554	1337	1645	1151	1182	1067	1026	1259	1284	1244	1259	1332
IRAK3	ENSG00000090376	58	44	42	37	67	57	101	88	75	65	66	58
LYZ	ENSG00000090382	0	1	0	4	2	0	0	1	1	1	1	0
SI	ENSG00000090402	0	0	0	0	0	0	0	0	0	0	0	0
MUL1	ENSG00000090432	471	446	489	433	443	366	330	302	470	411	397	442
TFAP4	ENSG00000090447	311	296	285	135	164	133	141	173	196	196	211	205
PDCD7	ENSG00000090470	511	499	543	390	482	374	507	430	553	469	470	490
SPG21	ENSG00000090487	1085	1087	1040	897	1053	875	1479	1331	1695	1154	1157	1203
FETUB	ENSG00000090512	0	0	0	6	3	10	4	7	5	3	3	5
DNAJB11	ENSG00000090520	2616	2427	2741	1057	1231	991	945	1145	1204	1539	1601	1645
P3H2	ENSG00000090530	736	787	821	590	562	548	759	715	889	695	688	753
THPO	ENSG00000090534	5	0	2	7	10	9	5	10	8	6	7	6
CHRD	ENSG00000090539	22	25	32	200	221	178	104	85	135	109	110	115
FLT3LG	ENSG00000090554	7	5	3	6	12	7	6	3	7	6	7	6
RAB11FIP3	ENSG00000090565	696	600	726	715	770	629	633	613	772	681	661	709
GNPTG	ENSG00000090581	280	252	298	624	571	488	413	376	516	439	400	434
ZNF268	ENSG00000090612	425	393	362	318	398	370	563	521	653	435	437	462
GOLGA3	ENSG00000090615	2887	2573	2775	2767	2853	2642	2471	1914	2722	2708	2447	2713
PABPC4	ENSG00000090621	5821	5395	5961	4861	5203	4494	4846	5180	5824	5176	5259	5426
CD209	ENSG00000090659	0	0	0	0	0	1	0	1	0	0	0	0
CERS4	ENSG00000090661	101	114	113	181	221	132	124	162	178	135	166	141
MCOLN1	ENSG00000090674	235	197	222	204	241	196	120	140	158	186	193	192
USP48	ENSG00000090686	1271	1297	1263	928	1088	1012	1147	1228	1410	1115	1204	1228
EFNB1	ENSG00000090776	681	668	807	1027	1243	946	944	878	1191	884	930	981
PDPR	ENSG00000090857	2398	2229	2169	1718	2120	2035	2079	1742	2093	2065	2030	2099
AARS1	ENSG00000090861	4160	4129	4459	1615	1784	1547	1605	1647	2112	2460	2520	2706
GLG1	ENSG00000090863	4047	3811	4172	4322	4767	4381	3735	3197	3821	4035	3925	4125
KIF4A	ENSG00000090889	1842	1774	1781	336	375	317	437	504	569	872	884	889
TNRC6A	ENSG00000090905	2161	1852	1997	1602	1889	1811	1957	1847	2124	1907	1863	1977
PLEKHG2	ENSG00000090924	1862	1501	1960	2218	2321	2067	1486	1840	1636	1855	1887	1888
DLL3	ENSG00000090932	29	28	26	182	189	180	131	80	143	114	99	116
NAT14	ENSG00000090971	186	186	212	265	238	202	222	169	258	224	198	224
PITPNM2	ENSG00000090975	193	168	180	105	128	111	90	91	107	129	129	133
EXOC1	ENSG00000090989	849	804	787	566	679	620	852	760	920	756	748	776
RBM27	ENSG00000091009	1306	1226	1069	435	569	505	885	953	957	875	916	844
POU4F3	ENSG00000091010	1	1	0	1	1	1	2	0	0	1	1	0
OSBPL8	ENSG00000091039	1666	1540	1236	490	825	670	1571	1319	1508	1242	1228	1138
DTX2	ENSG00000091073	137	97	145	101	133	86	96	111	130	111	114	120
NLRC4	ENSG00000091106	24	14	14	17	26	22	23	12	18	21	17	18
PUS7	ENSG00000091127	778	841	738	273	329	263	445	435	520	499	535	507
LAMB4	ENSG00000091128	13	3	9	14	12	7	9	7	16	12	7	11
NRCAM	ENSG00000091129	716	638	602	721	1091	880	1387	1381	1469	941	1037	984
LAMB1	ENSG00000091136	9937	8952	9870	16282	18122	17103	12706	11524	14828	12975	12866	13934
SLC26A4	ENSG00000091137	26	18	26	4	11	8	8	13	9	13	14	14
SLC26A3	ENSG00000091138	1	1	1	0	0	0	1	0	1	1	0	1
DLD	ENSG00000091140	1996	1994	1961	1740	2005	1763	2200	2146	2671	1979	2048	2132
WDR7	ENSG00000091157	406	375	386	341	400	346	460	429	514	402	401	415
TXNL1	ENSG00000091164	1467	1479	1414	980	1264	1039	1529	2019	1876	1325	1587	1443
IL5RA	ENSG00000091181	1	1	1	2	0	0	1	1	1	1	1	1
ABCC6	ENSG00000091262	14	5	9	20	38	32	24	12	28	19	18	23
CMTM6	ENSG00000091317	1234	1088	942	427	573	489	691	531	794	784	731	742
ITGA6	ENSG00000091409	1722	1446	1369	4408	5616	5180	4063	3992	4767	3398	3685	3772
RAPGEF4	ENSG00000091428	19	24	21	31	29	26	53	32	47	34	28	31
MAP3K20	ENSG00000091436	1531	1509	1415	512	640	592	1168	1101	1286	1070	1083	1098
SMPX	ENSG00000091482	115	139	119	1374	1447	1210	2008	2244	2445	1166	1277	1258
FH	ENSG00000091483	1891	1976	1995	986	1073	942	1164	995	1403	1347	1348	1447
SEL1L3	ENSG00000091490	638	587	640	594	671	562	523	487	614	585	582	605
TF	ENSG00000091513	8	1	9	30	21	25	15	14	27	18	12	20
CDV3	ENSG00000091527	10253	9829	9550	4692	5394	4590	6728	7063	7774	7224	7429	7305
MYO15A	ENSG00000091536	2	2	4	72	79	67	47	30	32	40	37	34
ALKBH5	ENSG00000091542	1341	1245	1402	932	951	821	1258	1149	1402	1177	1115	1208
APOH	ENSG00000091583	2	0	1	2	2	8	3	5	2	2	2	4
NLRP1	ENSG00000091592	569	496	605	526	542	443	790	822	968	628	620	672
PITPNM3	ENSG00000091622	136	121	119	26	49	45	62	46	75	75	72	80
SPAG7	ENSG00000091640	687	688	821	886	907	711	891	1119	1096	821	905	876
ORC6	ENSG00000091651	678	686	687	172	192	146	206	234	242	352	371	358
ZFHX4	ENSG00000091656	2156	1763	1913	1512	2184	2109	2451	2784	2524	2040	2244	2182
SLC17A6	ENSG00000091664	125	159	120	56	96	78	82	63	83	88	106	94
CPA1	ENSG00000091704	4	1	5	10	12	13	6	5	3	7	6	7
ZC3HC1	ENSG00000091732	480	522	516	378	384	328	425	385	552	428	430	465
ESR1	ENSG00000091831	9	4	7	13	25	25	27	23	27	16	17	20
RGS17	ENSG00000091844	133	109	96	53	72	54	128	87	113	105	89	88
ANGPT2	ENSG00000091879	28	25	24	22	24	15	28	20	31	26	23	23
TMEM101	ENSG00000091947	205	239	236	249	257	172	221	219	299	225	238	236
CD200	ENSG00000091972	170	152	151	137	171	161	204	236	260	170	186	191
CCDC80	ENSG00000091986	13638	12872	14177	4636	4819	4540	3643	4126	4183	7306	7272	7633
CMA1	ENSG00000092009	0	0	1	1	2	0	3	4	2	1	2	1
PSME1	ENSG00000092010	387	369	438	544	518	472	600	747	762	510	545	557
PPP2R3C	ENSG00000092020	617	614	519	246	343	315	486	490	584	450	482	473
HAUS4	ENSG00000092036	351	351	376	268	255	194	297	309	362	305	305	311
JPH4	ENSG00000092051	134	108	139	162	163	158	127	131	139	141	134	145
MYH7	ENSG00000092054	163	136	141	14935	13581	13354	6929	7247	8163	7342	6988	7219
CEBPE	ENSG00000092067	3	1	6	1	2	5	6	1	3	3	1	5
SLC7A8	ENSG00000092068	50	49	78	273	301	276	295	342	355	206	231	236
OSGEP	ENSG00000092094	463	408	459	467	545	446	382	387	402	437	447	436
SLC22A17	ENSG00000092096	221	201	262	494	436	435	311	278	370	342	305	356
RNF31	ENSG00000092098	614	532	621	488	500	488	384	379	470	495	470	526
SCFD1	ENSG00000092108	1086	1033	1007	752	943	798	1051	1142	1257	963	1039	1021
G2E3	ENSG00000092140	638	625	460	183	279	237	481	347	464	434	417	387
HECTD1	ENSG00000092148	3346	3129	2994	2557	3187	2991	3470	3012	3845	3124	3109	3277
HNRNPC	ENSG00000092199	8850	8671	9513	3471	3987	3287	4934	7538	6052	5752	6732	6284
RPGRIP1	ENSG00000092200	10	9	7	3	5	6	5	7	3	6	7	5
SUPT16H	ENSG00000092201	7046	6997	7236	2607	3029	2697	3490	4279	4201	4381	4768	4711
TOX4	ENSG00000092203	1439	1434	1523	1098	1215	981	1247	1292	1439	1261	1314	1314
GEMIN2	ENSG00000092208	253	283	248	114	129	125	195	164	193	187	192	189
TGM1	ENSG00000092295	16	10	15	22	21	22	17	12	20	18	14	19
TINF2	ENSG00000092330	486	484	491	339	372	331	382	327	426	402	394	416
DAZL	ENSG00000092345	0	0	0	13	17	13	7	4	4	7	7	6
TBL1Y	ENSG00000092377	6	4	5	8	6	11	16	8	14	10	6	10
SEMA6A	ENSG00000092421	679	593	697	3202	4160	3581	3033	3238	3438	2305	2664	2572
TRPM7	ENSG00000092439	1032	850	804	668	871	838	1038	993	1136	913	905	926
TYRO3	ENSG00000092445	358	387	418	709	786	660	625	579	768	564	584	615
WDR76	ENSG00000092470	936	915	943	147	181	145	249	243	260	444	446	449
CAPN3	ENSG00000092529	9	8	13	618	577	530	348	360	361	325	315	301
SNAP23	ENSG00000092531	830	797	773	405	552	445	677	597	706	637	649	641
TBX15	ENSG00000092607	73	78	93	619	717	614	780	838	936	491	544	548
PHGDH	ENSG00000092621	1892	1913	2194	1428	1452	1218	1414	1396	1775	1578	1587	1729
COL9A3	ENSG00000092758	337	303	372	726	764	640	599	478	675	554	515	562
EZR	ENSG00000092820	3511	3483	3549	1049	1192	951	1239	1504	1449	1933	2060	1983
MYL6	ENSG00000092841	13019	13845	14766	5872	6053	4797	6907	8440	8577	8599	9446	9380
AGO1	ENSG00000092847	1423	1344	1393	1043	1251	1154	1410	1307	1473	1292	1301	1340
TEKT2	ENSG00000092850	2	4	6	13	14	17	16	11	17	10	10	13
CLSPN	ENSG00000092853	2015	2053	2033	256	277	244	349	537	404	873	956	894
RFFL	ENSG00000092871	407	395	425	257	296	306	369	363	397	344	351	376
UNC13D	ENSG00000092929	5	8	6	20	19	16	11	9	12	12	12	11
MFSD11	ENSG00000092931	2091	1858	2173	1019	1302	1113	1135	1072	1300	1415	1411	1529
DPYSL2	ENSG00000092964	5873	5536	5537	3110	3757	3262	4308	4373	4905	4430	4555	4568
TGFB2	ENSG00000092969	1076	1051	1009	468	745	643	1027	1163	1091	857	986	914
GPATCH2	ENSG00000092978	263	261	218	205	232	249	345	361	379	271	285	282
NUP50	ENSG00000093000	1844	1870	1720	604	789	639	934	892	1125	1127	1184	1161
CDC45	ENSG00000093009	914	931	939	107	129	104	125	182	151	382	414	398
COMT	ENSG00000093010	580	535	648	491	469	409	376	353	539	482	452	532
ADA2	ENSG00000093072	62	54	69	92	100	76	92	91	93	82	82	79
	ENSG00000093100	323	313	354	452	522	447	405	352	468	393	396	423
VNN3	ENSG00000093134	0	0	0	0	0	0	0	0	0	0	0	0
[truncated: 62,254 more rows]

## Sheet: 2_normalised_counts
gene_name	ensembl	SKGM_2d_1	SKGM_2d_2	SKGM_2d_3	KCTiP_7d_1	KCTiP_7d_2	KCTiP_7d_3	KCTiP_15d_1	KCTiP_15d_2	KCTiP_15d_3	baseline_1	baseline_2	baseline_3
TSPAN6	ENSG00000000003	464.234	461.399	420.336	704.168	675.442	668.609	728.66	535.049	729.709	607.292	534.695	592.038
TNMD	ENSG00000000005	23.3088	39.8481	48.2683	254.476	274.994	266.517	215.075	210.303	262.856	154.016	170.174	187.993
DPM1	ENSG00000000419	717.718	888.193	734.08	417.155	432.564	415.998	558.083	619.17	597.474	552.704	615.914	570.526
SCYL3	ENSG00000000457	264.167	252.721	238.325	235.885	267.969	266.517	266.063	257.254	265.275	247.596	248.493	247.852
C1orf112	ENSG00000000460	382.653	413.162	382.124	174.299	207.751	177.291	216.929	200.521	237.861	252.47	260.096	258.14
FGR	ENSG00000000938	1.9424	0	1.00559	4.64797	2.00726	1.15877	1.8541	0	0.806308	2.92436	0.966898	0.935289
CFH	ENSG00000000971	721.603	775.989	721.007	650.716	657.376	721.912	567.354	579.066	597.474	621.914	640.086	649.091
FUCA2	ENSG00000001036	1361.62	1488.01	1410.84	926.108	869.142	835.472	742.566	672.969	793.407	974.786	958.196	968.96
GCLC	ENSG00000001084	423.444	464.545	426.37	211.483	244.885	247.976	249.376	269.97	251.568	288.537	310.374	296.487
NFYA	ENSG00000001167	904.189	910.214	902.013	693.71	751.717	847.059	940.955	913.594	872.425	826.619	821.863	844.566
STPG1	ENSG00000001460	106.832	131.079	164.917	38.3458	47.1705	57.9384	50.0606	48.9076	43.5406	64.3359	71.5504	83.2408
NIPAL3	ENSG00000001461	186.471	169.879	192.068	167.327	169.613	214.372	208.586	170.199	177.388	182.285	162.439	186.123
LAS1L	ENSG00000001497	1080.95	1048.63	1059.89	594.94	590.133	608.353	487.628	523.312	471.69	698.922	684.564	674.344
ENPP4	ENSG00000001561	91.2929	84.9393	63.3521	196.377	231.838	259.564	261.428	219.106	244.311	177.411	173.075	184.252
SEMA3F	ENSG00000001617	171.903	149.955	180	364.866	279.009	301.28	170.577	163.351	174.163	219.327	189.512	203.893
CFTR	ENSG00000001626	0.971202	0	0	3.48598	3.01088	4.63507	3.7082	8.80337	1.61262	2.92436	3.86759	1.87058
ANKIB1	ENSG00000001629	970.23	998.3	844.695	641.42	818.96	887.616	1032.73	941.961	966.763	865.61	879.877	874.496
CYP51A1	ENSG00000001630	1581.12	1656.84	1487.27	1694.19	1984.17	1849.39	2269.42	1955.33	2403.6	1798.48	1790.69	1888.35
KRIT1	ENSG00000001631	503.082	492.858	447.487	410.184	536.941	581.701	580.333	628.952	591.024	486.418	530.827	523.762
RAD52	ENSG00000002016	140.824	138.42	128.715	249.828	294.063	271.152	220.638	182.914	224.96	193.982	197.247	200.152
MYH16	ENSG00000002079	2.9136	1.04863	4.02236	1.16199	2.00726	2.31754	1.8541	5.86891	1.61262	1.94957	2.90069	2.80587
BAD	ENSG00000002330	314.669	335.563	385.141	296.308	227.824	235.23	232.689	174.111	226.573	270.016	233.989	270.299
LAP3	ENSG00000002549	1120.77	1330.72	1279.11	741.352	703.543	641.957	686.016	625.039	654.722	822.719	841.201	822.119
CD99	ENSG00000002586	5187.19	5529.45	6061.69	4449.27	3956.3	3752.09	3454.18	4581.67	3793.68	4190.61	4479.64	4355.64
HS3ST1	ENSG00000002587	13.5968	15.7295	21.1174	119.685	97.3519	105.448	116.808	114.444	121.752	78.9577	73.4842	82.3055
AOC1	ENSG00000002726	0.971202	1.04863	2.01118	0	2.00726	0	0.927049	0.978152	0	0.974786	0.966898	0.935289
WNT16	ENSG00000002745	53.4161	54.529	72.4024	58.0996	35.127	49.827	103.829	96.8371	115.302	70.1846	59.9477	80.4349
HECW1	ENSG00000002746	131.112	97.523	126.704	79.0155	107.388	97.3365	75.091	105.64	82.2434	92.6047	99.5905	97.2701
MAD1L1	ENSG00000002822	509.881	510.685	550.057	306.766	289.045	271.152	230.835	253.341	224.96	337.276	333.58	330.157
LASP1	ENSG00000002834	12074	12226	12983.2	3991.45	3907.12	3971.1	3450.48	3718.94	3589.68	6365.35	6237.46	6481.56
SNX11	ENSG00000002919	243.772	270.548	258.436	220.779	158.573	156.434	179.847	123.247	212.865	206.655	175.009	204.828
TMEM176A	ENSG00000002933	33.0209	42.994	51.285	60.4236	76.2757	99.654	67.6746	80.2085	76.5993	51.6637	63.8153	72.0173
M6PR	ENSG00000003056	1321.81	1287.72	1351.51	812.233	855.091	849.377	775.94	904.791	763.574	941.643	968.832	942.772
KLHL13	ENSG00000003096	129.17	141.566	126.704	277.716	325.175	370.806	623.904	610.367	575.704	339.226	349.05	361.957
CYP26B1	ENSG00000003137	25.2512	7.34044	19.1062	45.3177	38.1379	42.8744	33.3738	36.1916	30.6397	33.1427	26.1062	28.994
ICA1	ENSG00000003147	13.5968	12.5836	12.0671	11.6199	11.0399	12.7464	5.56229	7.82522	8.06308	9.74786	9.66898	10.2882
DBNDD1	ENSG00000003249	159.277	185.608	174.973	155.707	143.519	137.893	119.589	171.177	127.397	138.42	159.538	140.293
ALS2	ENSG00000003393	1050.84	1039.2	965.366	1103.89	1158.19	1199.32	1085.57	1123.9	1069.97	1041.07	1061.65	1035.37
CASP10	ENSG00000003400	2.9136	3.1459	1.00559	6.97196	5.01814	2.31754	4.63524	6.84707	4.03154	4.87393	4.83449	2.80587
CFLAR	ENSG00000003402	448.695	341.855	396.202	672.794	723.616	779.851	665.621	669.056	637.79	571.225	557.9	578.944
TFPI	ENSG00000003436	2247.36	2118.24	1628.05	836.635	1031.73	1028.99	1194.04	1314.64	1246.55	1404.67	1415.54	1263.58
NDUFAF7	ENSG00000003509	370.028	335.563	348.939	348.598	353.277	338.36	360.622	366.807	344.293	347.999	337.447	332.028
RBM5	ENSG00000003756	1432.52	1383.15	1457.1	3812.5	4234.31	4061.48	3316.98	3287.57	3065.58	2707.96	2867.82	2730.11
MTMR7	ENSG00000003987	67.0129	66.0639	60.3353	41.8317	71.2576	63.7322	97.3401	105.64	96.7569	68.235	78.3187	72.9526
SLC7A2	ENSG00000003989	770.163	684.758	603.353	570.539	638.307	673.244	795.408	597.651	674.88	695.997	612.046	629.45
ARF5	ENSG00000004059	738.113	744.53	834.639	771.563	728.634	633.846	661.913	1041.73	753.898	695.022	806.393	721.108
SARM1	ENSG00000004139	388.481	360.73	412.292	564.729	588.126	571.273	470.941	411.802	433.794	453.276	435.104	448.939
POLDIP2	ENSG00000004142	2124.99	2170.67	2348.05	1286.33	1124.06	1060.27	1033.66	1117.05	1090.13	1432.94	1396.2	1434.73
PLXND1	ENSG00000004399	834.262	751.871	937.209	1214.28	1103.99	1146.02	726.806	677.86	744.222	873.408	809.294	886.654
AK2	ENSG00000004455	1938.52	2141.31	2201.23	1331.64	1322.78	1261.9	1358.13	1581.67	1417.49	1497.27	1604.08	1570.35
CD38	ENSG00000004468	3.88481	0	1.00559	5.80996	3.01088	3.4763	2.78115	2.93446	1.61262	3.89914	1.9338	1.87058
FKBP4	ENSG00000004478	3738.15	3994.25	4035.43	1152.7	896.24	949.031	955.787	995.759	1050.62	1907.66	1843.87	1912.67
KDM1A	ENSG00000004487	3676.97	3973.27	4029.4	2636.56	2393.65	2451.95	2834.92	2988.26	2782.57	2961.4	2974.18	2984.51
RBM6	ENSG00000004534	1706.4	1802.6	1795.98	2241.48	2169.84	2243.37	1735.44	2082.49	1669.86	1806.28	1936.7	1806.04
CAMKK1	ENSG00000004660	112.659	142.614	139.777	105.741	98.3555	97.3365	73.2369	55.7547	75.7929	92.6047	93.7891	99.1407
RECQL	ENSG00000004700	2088.08	2019.67	1696.43	490.361	608.198	639.64	672.11	564.394	664.398	1071.29	1001.71	954.93
VPS50	ENSG00000004766	370.028	350.244	292.626	276.554	339.226	342.995	376.382	436.256	411.217	333.377	360.653	342.316
HSPB6	ENSG00000004776	793.472	806.399	1056.87	1392.07	1209.37	1132.12	1048.49	2775.02	1240.91	1022.55	1550.9	1112.06
ARHGAP33	ENSG00000004777	256.397	179.316	280.559	417.155	366.324	367.329	242.887	262.145	241.086	287.562	259.129	278.716
NDUFAB1	ENSG00000004779	831.349	959.5	855.756	630.962	586.119	548.097	721.244	582.001	698.263	707.695	674.895	682.761
PDK4	ENSG00000004799	29.136	28.3131	16.0894	266.096	251.911	286.216	265.136	243.56	253.987	177.411	170.174	180.511
SLC22A16	ENSG00000004809	0	0	0	0	1.00363	0	0	0	0	0	0	0
ZMYND10	ENSG00000004838	1.9424	0	7.03912	12.7819	14.0508	12.7464	17.6139	22.4975	25.8019	10.7226	11.6028	15.8999
ABCB5	ENSG00000004846	2.9136	6.2918	4.02236	12.7819	26.0943	24.3341	50.0606	56.7328	47.5722	22.4201	29.0069	26.1881
ARX	ENSG00000004848	7.76961	6.2918	6.03353	58.0996	88.3193	59.0972	64.8934	94.8808	72.5677	41.9158	61.8815	45.8292
SLC25A13	ENSG00000004864	769.192	802.205	771.287	445.043	421.524	455.396	542.324	480.273	560.384	572.199	540.496	578.009
ST7	ENSG00000004866	462.292	480.274	508.828	318.386	317.146	285.057	255.865	323.768	287.852	333.377	355.818	346.057
CDC27	ENSG00000004897	2524.15	2606.9	2173.08	1060.9	1212.38	1200.48	1664.05	1783.17	1636.81	1724.4	1778.13	1629.27
SLC4A1	ENSG00000004939	0	0	0	0	0	0	0.927049	0	0	0	0	0
CALCR	ENSG00000004948	0	0	0	0	2.00726	1.15877	4.63524	1.9563	3.22523	1.94957	0.966898	1.87058
HCCS	ENSG00000004961	466.177	493.907	479.666	304.442	361.306	311.709	398.631	420.606	400.735	381.141	406.097	387.21
DVL2	ENSG00000004975	776.961	786.475	902.013	706.492	669.42	704.531	568.281	580.044	658.754	657.006	647.822	723.914
PRSS22	ENSG00000005001	0	0	0	0	0	0	0	0	0	0	0	0
UPF1	ENSG00000005007	1859.85	1774.29	1964.92	1351.4	1247.51	1209.75	1042	973.262	1043.36	1365.68	1266.64	1338.4
SKAP2	ENSG00000005020	321.468	284.18	297.654	397.402	425.538	523.763	535.834	545.809	515.231	406.486	404.163	432.104
SLC25A5	ENSG00000005022	4508.32	4902.36	4309.95	1947.5	1750.33	1832.01	2046	1741.11	2194.77	2770.34	2642.53	2677.73
MCUB	ENSG00000005059	401.106	399.53	369.051	145.249	158.573	132.1	213.221	194.652	211.253	249.545	237.857	231.952
HOXA11	ENSG00000005073	18.4528	13.6322	28.1565	3.48598	7.0254	5.79384	3.7082	5.86891	0.806308	8.77307	8.70208	10.2882
POLR2J	ENSG00000005075	337.007	341.855	392.18	204.511	195.707	190.038	191.899	206.39	249.955	236.873	235.923	269.363
DHX33	ENSG00000005100	1031.42	986.765	992.516	495.009	532.926	487.841	543.251	483.207	486.204	673.577	633.318	626.644
MEOX1	ENSG00000005102	1.9424	0	3.01677	23.2399	13.0472	20.8578	31.5197	40.1042	31.446	18.5209	17.4042	18.7058
THSD7A	ENSG00000005108	412.761	356.536	294.638	472.931	515.865	535.351	492.263	447.994	387.028	442.553	422.534	385.339
LIG3	ENSG00000005156	983.827	996.202	984.472	756.457	752.721	820.408	800.97	795.238	740.997	821.745	810.26	812.766
RPAP3	ENSG00000005175	724.516	750.822	643.577	442.719	440.593	504.064	509.877	649.493	545.87	544.905	585.94	546.209
ACSM3	ENSG00000005187	52.4449	49.2858	36.2012	95.2834	112.406	103.13	189.118	206.39	155.617	110.151	118.928	99.1407
REXO5	ENSG00000005189	235.031	247.478	223.241	74.3675	57.2068	88.0664	58.4041	50.8639	52.41	119.899	111.193	113.17
CIAPIN1	ENSG00000005194	859.513	1048.63	933.187	603.074	541.959	539.986	607.217	489.076	668.429	668.703	657.491	693.049
SPPL2B	ENSG00000005206	246.685	230.699	321.789	815.719	725.623	726.547	425.515	356.047	444.276	460.099	421.567	466.709
FAM214B	ENSG00000005238	344.777	328.222	358.995	400.888	393.422	371.964	274.406	358.004	328.974	323.629	345.183	338.575
COPZ2	ENSG00000005243	182.586	177.219	184.023	417.155	358.295	381.235	250.303	194.652	259.631	265.142	233.989	260.01
PRKAR2B	ENSG00000005249	185.499	192.949	190.056	158.031	176.639	170.339	237.324	228.888	201.577	189.108	191.446	182.381
MSL3	ENSG00000005302	473.946	396.384	448.493	497.333	482.745	491.318	482.992	575.154	479.753	466.923	466.045	456.421
CREBBP	ENSG00000005339	1869.56	1675.72	1836.21	1930.07	2083.53	2137.93	1929.19	2351.48	1700.5	1841.37	1958.94	1802.3
TSPOAP1	ENSG00000005379	34.9633	33.5563	32.1789	109.227	94.341	89.2251	90.8508	81.1866	91.1128	74.0837	67.6829	69.2114
MPO	ENSG00000005381	0	0	0	0	0	0	0	0.978152	0.806308	0	0	0
PON1	ENSG00000005421	0	0	0	3.48598	1.00363	1.15877	1.8541	0.978152	0	1.94957	0.966898	0
GCFC2	ENSG00000005436	425.386	455.107	344.917	203.349	240.871	230.595	382.871	357.026	369.289	333.377	334.547	311.451
WDR54	ENSG00000005448	231.146	291.52	295.643	133.629	96.3483	98.4953	105.684	85.0993	121.752	152.067	148.902	165.546
CROT	ENSG00000005469	168.989	187.705	164.917	130.143	137.497	162.228	193.753	134.007	154.811	160.84	146.002	154.323
ABCB4	ENSG00000005471	13.5968	13.6322	34.19	10.4579	5.01814	5.79384	3.7082	8.80337	4.03154	8.77307	8.70208	14.0293
KMT2E	ENSG00000005483	1568.49	1514.23	1610.95	1231.71	1276.61	1296.66	1468.45	2269.31	1497.31	1384.2	1623.42	1427.25
RHBDD2	ENSG00000005486	401.106	394.286	475.644	441.557	472.709	342.995	294.802	310.074	324.942	360.671	375.156	365.698
SOX8	ENSG00000005513	208.808	193.997	276.537	396.24	375.357	373.123	525.637	506.683	547.483	364.57	347.116	397.498
IBTK	ENSG00000005700	1303.35	1328.62	1070.95	666.984	804.91	913.109	1054.98	920.441	1001.43	992.332	969.799	965.219
ZNF195	ENSG00000005801	670.129	585.138	528.94	623.99	586.119	616.465	685.089	674.925	662.785	638.485	590.775	586.426
MYCBP2	ENSG00000005810	1757.87	1728.15	1562.69	1640.73	1801.51	2081.15	1943.09	1645.25	1533.6	1728.3	1651.46	1637.69
FBXL3	ENSG00000005812	866.312	901.825	711.957	527.545	683.471	640.799	857.52	747.308	811.952	737.913	742.578	707.079
ITGAL	ENSG00000005844	2.9136	1.04863	2.01118	1.16199	0	0	0	0	0	0.974786	0	0.935289
PDK2	ENSG00000005882	190.355	207.63	245.364	528.707	484.752	429.903	350.424	454.841	348.325	334.352	369.355	326.416
ITGA3	ENSG00000005884	859.513	802.205	923.131	148.735	127.461	143.687	92.7049	83.143	107.239	361.646	315.209	366.633
ZFX	ENSG00000005889	535.132	548.436	521.901	497.333	444.607	523.763	551.594	556.569	536.195	511.763	495.052	509.733
LAMP2	ENSG00000005893	1987.08	2057.42	1810.06	1250.3	1541.57	1509.87	1636.24	1308.77	1502.15	1587.93	1558.64	1547.9
ITGA2B	ENSG00000005961	5.82721	4.19454	5.02795	33.6978	16.058	26.6517	25.0303	14.6723	23.3829	20.4705	11.6028	17.7705
ASB4	ENSG00000005981	2.9136	8.38907	3.01677	1003.96	1021.69	1067.23	1170.86	1288.23	1232.04	692.098	755.147	764.131
GDE1	ENSG00000006007	911.958	1006.69	953.298	1256.11	1130.08	1168.04	1165.3	1154.22	1220.75	1064.47	1052.95	1082.13
REX1BD	ENSG00000006015	171.903	149.955	219.218	189.405	197.715	159.91	105.684	145.745	131.428	147.193	157.604	161.805
CRLF1	ENSG00000006016	100.034	106.961	121.676	67.3956	97.3519	85.7488	53.7688	59.6673	70.9551	71.1594	84.1201	87.9172
OSBPL7	ENSG00000006025	105.861	84.9393	129.721	228.913	197.715	244.5	107.538	96.8371	115.302	137.445	121.829	150.582
TMEM98	ENSG00000006042	590.491	638.618	699.89	657.688	662.394	608.353	563.646	466.579	587.798	579.023	562.735	607.938
YBX2	ENSG00000006047	1.9424	4.19454	5.02795	19.7539	13.0472	12.7464	16.6869	16.6286	13.7072	11.6974	10.6359	10.2882
KRT33A	ENSG00000006059	0	0	0	0	0	0	0	0	0	0	0	0
MAP3K14	ENSG00000006062	520.564	501.247	530.951	177.785	180.653	172.656	131.641	115.422	121.752	270.016	250.427	258.14
ABCC8	ENSG00000006071	7.76961	6.2918	6.03353	20.9159	28.1016	45.1919	22.2492	19.563	16.9325	16.5714	17.4042	20.5764
CACNG3	ENSG00000006116	0.971202	2.09727	0	0	1.00363	0	0	0.978152	1.61262	0	0.966898	0.935289
TMEM132A	ENSG00000006118	694.409	628.132	705.924	2485.5	2172.85	2270.03	1168.08	1005.54	1150.6	1336.43	1222.16	1274.8
AP2B1	ENSG00000006125	6836.29	7113.93	7025.05	4141.34	4218.25	4325.68	4561.08	4483.85	4455.66	5043.54	5018.2	5064.59
TAC1	ENSG00000006128	40.7905	59.7721	46.2571	66.2336	86.312	66.0498	79.7262	66.5144	72.5677	60.4367	67.6829	59.8585
ZNF263	ENSG00000006194	590.491	655.396	677.767	662.336	646.336	658.18	571.062	661.231	590.217	582.922	626.55	615.42
CX3CL1	ENSG00000006210	35.9345	30.4104	54.3018	66.2336	59.214	56.7796	44.4983	55.7547	57.2479	45.8149	46.4111	54.2468
SPATA20	ENSG00000006282	236.973	240.137	276.537	587.968	551.995	597.924	295.729	280.73	349.938	347.024	343.249	381.598
CACNA1G	ENSG00000006283	61.1857	53.4803	67.3745	479.903	483.749	469.301	344.862	330.616	376.546	275.864	280.4	292.746
TNFRSF12A	ENSG00000006327	1416.98	1555.12	1586.82	169.651	170.617	151.799	143.693	144.767	163.681	572.199	580.139	595.779
DLX6	ENSG00000006377	0	1.04863	1.00559	1.16199	0	0	0.927049	0.978152	0.806308	0.974786	0.966898	0.935289
MAP3K9	ENSG00000006432	173.845	192.949	155.866	145.249	124.45	120.512	138.13	97.8152	107.239	147.193	131.498	122.523
RALA	ENSG00000006451	1116.88	1139.87	1017.66	705.33	742.685	756.675	1008.63	987.934	1022.4	924.097	914.685	914.713
BAIAP2L1	ENSG00000006453	220.463	224.408	226.258	51.1277	51.185	71.8436	76.018	72.3833	62.892	115.025	109.259	114.105
KDM7A	ENSG00000006459	145.68	125.836	106.592	220.779	299.081	267.675	371.747	313.987	329.78	240.772	237.857	232.887
ETV1	ENSG00000006468	316.612	315.639	270.503	410.184	494.789	520.287	669.329	740.461	661.172	455.225	499.886	479.803
AGK	ENSG00000006530	675.956	768.649	713.968	483.389	426.542	422.95	470.941	480.273	469.271	526.384	531.794	516.28
ALDH3B1	ENSG00000006534	70.8977	71.3071	79.4415	142.925	128.464	133.258	130.714	125.204	165.293	109.176	104.425	124.393
TTC22	ENSG00000006555	0	1.04863	0	1.16199	4.01451	2.31754	3.7082	3.91261	4.83785	1.94957	2.90069	2.80587
PHTF2	ENSG00000006576	818.723	844.15	625.476	363.704	509.843	438.014	586.822	526.246	523.294	580.972	596.576	514.409
CCL26	ENSG00000006606	1.9424	0	0	0	3.01088	1.15877	2.78115	0.978152	1.61262	1.94957	0.966898	0.935289
FARP2	ENSG00000006607	1309.18	1332.81	1278.1	886.601	928.356	935.126	1074.45	862.73	905.484	1062.52	992.037	997.954
USH1C	ENSG00000006611	5.82721	6.2918	12.0671	1.16199	8.02902	5.79384	3.7082	4.89076	1.61262	3.89914	5.80139	5.61174
GGCT	ENSG00000006625	767.249	893.436	744.136	412.508	369.335	342.995	457.962	584.935	516.037	532.233	585.94	522.827
DBF4	ENSG00000006634	842.032	825.275	728.047	160.355	189.686	179.609	273.479	371.698	303.172	422.082	437.038	390.951
TBXA2R	ENSG00000006638	20.3952	13.6322	17.095	10.4579	12.0435	9.27014	6.48934	9.78152	4.83785	11.6974	11.6028	9.35289
IFRD1	ENSG00000006652	1036.27	1160.84	1058.89	327.682	375.357	352.265	451.473	395.174	439.438	596.569	607.212	592.973
LGALS14	ENSG00000006659	0	0	0	0	0	0	0	0	0	0	0	0
COX10	ENSG00000006695	269.994	249.575	260.448	220.779	230.834	209.737	246.595	266.057	227.379	238.823	238.824	225.405
GTF2IRD1	ENSG00000006704	505.996	503.344	519.89	578.672	536.941	527.239	459.816	469.513	479.753	492.267	481.515	488.221
PAF1	ENSG00000006712	1081.92	1188.1	1370.62	909.84	790.859	814.614	736.077	1176.72	778.893	874.383	1006.54	945.578
VPS41	ENSG00000006715	803.184	823.178	752.181	836.635	833.011	902.68	966.912	985.978	953.056	841.24	845.069	844.566
ARHGAP44	ENSG00000006740	60.2145	60.8208	74.4136	147.573	139.504	156.434	100.121	105.64	108.045	96.5038	98.6236	106.623
ELAC2	ENSG00000006744	1653.96	1669.43	1875.42	1057.41	951.439	1017.4	706.411	799.151	782.119	1096.63	1081.96	1157.89
SCIN	ENSG00000006747	0.971202	4.19454	3.01677	0	0	1.15877	0.927049	0.978152	1.61262	0.974786	1.9338	1.87058
ARSD	ENSG00000006756	80.6097	91.2312	95.531	291.66	313.132	290.851	234.543	213.237	220.928	191.058	199.181	193.605
PNPLA4	ENSG00000006757	127.227	141.566	142.794	123.171	142.515	125.147	155.744	179.98	179.807	131.596	148.902	147.776
MYH13	ENSG00000006788	9.71202	16.7781	10.0559	38.3458	32.1161	40.5569	26.8844	21.5194	21.7703	23.3949	22.2387	22.4469
ADIPOR2	ENSG00000006831	1278.1	1373.71	1302.24	1223.58	1168.22	1170.36	1150.47	986.956	1164.31	1172.67	1122.57	1169.11
CDKL3	ENSG00000006837	29.136	42.994	34.19	34.8598	48.1741	39.3981	62.1123	66.5144	56.4416	40.941	50.2787	43.0233
UPP2	ENSG00000007001	1.9424	0	1.00559	1.16199	0	2.31754	0	1.9563	1.61262	0.974786	0.966898	1.87058
PRSS21	ENSG00000007038	0	0	0	0	0	0	0	0	0	0	0	0
MARK4	ENSG00000007047	665.273	651.202	773.298	877.305	825.986	775.216	771.305	925.332	810.339	737.913	770.618	761.326
PROM1	ENSG00000007062	331.18	309.347	325.811	178.947	229.831	178.45	317.978	301.271	329.78	271.965	267.831	276.846
CCDC124	ENSG00000007080	1087.75	1127.28	1297.21	662.336	585.115	451.919	560.865	901.857	653.109	745.711	831.532	776.29
CEACAM21	ENSG00000007129	1.9424	1.04863	1.00559	0	0	0	0	0	0.806308	0.974786	0	0.935289
PAFAH1B1	ENSG00000007168	3714.85	3769.84	3436.1	2400.68	2518.1	2570.15	3170.51	2478.64	2802.73	3025.74	2783.7	2840.47
NOS2	ENSG00000007171	7.76961	7.34044	3.01677	1.16199	0	0	1.8541	0.978152	1.61262	3.89914	2.90069	1.87058
DNAH9	ENSG00000007174	10.6832	8.38907	17.095	76.6915	84.3047	97.3365	76.9451	99.7715	91.1128	51.6637	62.8484	66.4055
KIAA0100	ENSG00000007202	4352.93	4233.34	4494.98	3463.9	3281.86	3548.15	2961.92	2702.64	2747.9	3463.41	3245.88	3411
SLC13A2	ENSG00000007216	0	0	0	0	0	0	0	0	0	0	0	0
GAS7	ENSG00000007237	424.415	459.302	534.973	1164.32	1078.9	1140.23	1092.99	1164	1062.71	850.988	871.175	883.848
TRAPPC6A	ENSG00000007255	27.1936	37.7508	38.2124	115.037	88.3193	86.9076	71.3828	79.2303	91.9191	66.2855	65.7491	71.082
MATK	ENSG00000007264	2.9136	4.19454	0	6.97196	7.0254	3.4763	7.41639	5.86891	7.25677	5.84872	5.80139	3.74116
CEACAM7	ENSG00000007306	0	0	0	0	0	0	0	0	0	0	0	0
CD79B	ENSG00000007312	3.88481	2.09727	1.00559	25.5638	22.0798	16.2228	10.1975	9.78152	8.86939	11.6974	10.6359	8.4176
SCN4A	ENSG00000007314	3.88481	2.09727	4.02236	182.433	186.675	200.467	104.757	97.8152	118.527	88.7055	92.8222	101.011
ST7L	ENSG00000007341	277.764	284.18	263.464	366.028	423.531	422.95	419.953	447.016	413.636	342.15	370.322	355.41
TKTL1	ENSG00000007350	10.6832	17.8268	23.1285	175.461	180.653	168.021	248.449	244.538	245.924	139.394	144.068	147.776
PAX6	ENSG00000007372	57.3009	59.7721	57.3186	127.819	128.464	128.623	241.96	344.31	222.541	139.394	173.075	138.423
RPUSD1	ENSG00000007376	343.805	329.271	388.157	246.343	204.74	194.673	135.349	166.286	164.487	231.024	221.42	236.628
RHBDF1	ENSG00000007384	360.316	299.909	394.191	726.246	697.521	698.737	363.403	364.851	388.64	451.326	436.071	460.162
LUC7L	ENSG00000007392	663.331	678.466	699.89	1495.48	1540.57	1480.91	1098.55	1110.2	1053.04	1025.47	1069.39	1022.27
CACNA2D2	ENSG00000007402	91.2929	90.1825	102.57	163.841	165.599	135.576	114.027	149.657	128.203	116	130.531	117.846
BAIAP3	ENSG00000007516	222.405	255.867	267.487	263.772	239.867	231.754	208.586	325.725	224.154	221.276	262.996	231.952
TSR3	ENSG00000007520	623.511	636.521	717.991	561.243	484.752	453.078	396.777	512.552	407.992	504.939	520.191	502.25
PIGQ	ENSG00000007541	308.842	298.861	408.269	434.585	349.263	375.441	221.565	196.609	227.379	302.184	268.798	315.193
CRAMP1	ENSG00000007545	556.498	444.621	493.744	778.535	773.797	742.77	626.685	492.989	556.352	623.863	547.264	567.721
TEAD3	ENSG00000007866	701.208	627.083	792.404	623.99	519.879	534.192	474.649	571.241	486.204	575.124	548.231	577.074
SELE	ENSG00000007908	0	0	1.00559	0	0	0	0	0	0	0	0	0
DNAJC11	ENSG00000007923	1764.67	1665.23	1826.15	1193.37	1050.8	1107.78	1013.26	1137.59	1016.75	1278.92	1224.09	1257.03
FMO3	ENSG00000007933	0.971202	0	0	5.80996	8.02902	5.79384	10.1975	4.89076	10.482	5.84872	3.86759	5.61174
MYLIP	ENSG00000007944	61.1857	47.1885	50.2795	318.386	317.146	292.01	317.978	275.839	270.113	221.276	206.916	198.281
NOX1	ENSG00000007952	4.85601	2.09727	3.01677	0	3.01088	0	7.41639	9.78152	11.2883	3.89914	4.83449	5.61174
E2F2	ENSG00000007968	356.431	364.925	341.9	126.657	138.501	119.353	143.693	166.286	141.104	204.705	211.751	192.67
PSMB1	ENSG00000008018	2279.41	2678.21	2480.79	1238.68	1203.35	1143.7	1219.07	1285.29	1204.62	1536.26	1633.09	1542.29
SYN1	ENSG00000008056	101.005	103.815	115.643	88.3115	53.1923	60.2559	62.1123	81.1866	57.2479	79.9325	75.418	73.8879
JARID2	ENSG00000008083	636.137	575.7	604.359	771.563	743.688	747.405	792.627	835.342	778.893	706.72	691.332	689.308
CDKL5	ENSG00000008086	118.487	141.566	127.71	235.885	237.86	274.628	316.124	246.494	237.055	216.403	201.115	204.828
CAMK1G	ENSG00000008118	5.82721	7.34044	8.04471	10.4579	5.01814	2.31754	2.78115	5.86891	8.86939	5.84872	5.80139	6.54703
CDK11A	ENSG00000008128	176.759	189.803	222.235	257.962	254.921	297.803	167.796	224.975	158.036	190.083	214.651	210.44
NADK	ENSG00000008130	656.532	709.925	737.097	597.264	545.974	559.685	472.795	394.195	478.141	552.704	523.092	563.979
TFAP2B	ENSG00000008196	68.9553	69.2098	63.3521	65.0716	89.3229	73.0024	74.1639	72.3833	73.374	67.2602	73.4842	67.3408
TFAP2D	ENSG00000008197	0	0	0	0	0	0	0	0	0	0	0	0
DLEC1	ENSG00000008226	134.997	126.885	138.771	199.863	172.624	155.275	133.495	163.351	170.937	148.167	147.935	150.582
CYTH3	ENSG00000008256	1548.1	1558.27	1576.76	1980.04	1871.77	1838.96	1456.39	1618.84	1477.96	1582.08	1613.75	1555.39
ADAM22	ENSG00000008277	108.775	94.3771	112.626	127.819	152.551	156.434	193.753	186.827	170.937	140.369	139.233	143.099
SYPL1	ENSG00000008282	868.254	972.084	741.119	433.423	514.861	485.524	711.973	488.098	644.24	660.905	624.616	609.809
CYB561	ENSG00000008283	77.6961	72.3557	95.531	82.5015	91.3301	66.0498	79.7262	63.5799	104.82	77.0081	72.5173	87.9172
SPAG9	ENSG00000008294	2844.65	2723.3	2566.26	2110.18	2205.97	2407.92	2642.09	2268.34	2522.94	2468.16	2292.51	2418.66
CELSR3	ENSG00000008300	279.706	201.338	275.531	415.993	398.44	414.839	363.403	258.232	312.847	337.276	274.599	317.998
AASS	ENSG00000008311	283.591	245.38	264.47	826.177	813.942	943.237	701.776	635.799	620.857	572.199	546.297	576.138
PLEKHG6	ENSG00000008323	8.74081	9.43771	12.0671	4.64797	8.02902	9.27014	5.56229	1.9563	6.45046	5.84872	5.80139	8.4176
SS18L2	ENSG00000008324	192.298	243.283	205.14	96.4454	116.421	133.258	144.62	116.4	154.005	142.319	150.836	158.999
MPND	ENSG00000008382	110.717	110.107	126.704	159.193	133.483	148.322	115.881	127.16	134.653	121.848	118.928	130.941
MGST1	ENSG00000008394	232.117	278.937	251.397	359.056	344.244	353.424	437.567	465.601	439.438	331.427	350.017	343.251
CRY1	ENSG00000008405	682.755	760.26	628.493	316.062	266.965	278.104	302.218	235.735	276.564	423.057	397.395	376.922
PGLYRP1	ENSG00000008438	0	1.04863	0	2.32399	2.00726	2.31754	1.8541	0.978152	1.61262	0.974786	0.966898	0.935289
NFIX	ENSG00000008441	1261.59	1230.05	1491.29	1119	1150.16	1093.88	953.933	1156.18	939.349	1069.34	1128.37	1119.54
ST3GAL1	ENSG00000008513	380.711	391.14	374.079	304.442	288.041	278.104	281.823	281.708	293.496	310.957	305.54	303.969
MMP25	ENSG00000008516	21.3664	15.7295	20.1118	73.2056	67.2431	64.891	36.1549	31.3009	24.1892	39.9662	36.7421	32.7351
IL32	ENSG00000008517	290.389	333.466	352.962	297.47	233.845	231.754	480.211	618.192	516.843	348.973	380.958	371.31
PKD1	ENSG00000008710	679.841	614.499	715.979	1633.76	1435.19	1675.58	930.757	668.078	795.02	1010.85	870.208	980.183
MAPK8IP2	ENSG00000008735	152.479	165.684	169.945	212.645	209.758	206.261	169.65	184.871	174.163	169.613	178.876	175.834
MED24	ENSG00000008838	1225.66	1145.11	1302.24	1123.65	981.548	1016.24	739.785	701.335	803.889	983.559	898.248	987.666
RHOBTB2	ENSG00000008853	587.577	604.013	705.924	734.38	613.217	663.974	528.418	574.175	570.06	586.821	571.437	618.226
HEATR5B	ENSG00000008869	491.428	496.004	464.582	583.32	615.224	712.642	589.603	610.367	531.357	534.183	551.132	541.533
SEC62	ENSG00000008952	2110.42	2173.82	1974.98	2047.43	2046.4	2110.12	2260.15	2564.72	2380.22	2070.45	2170.69	2100.66
RPS20	ENSG00000008988	6793.55	7683.34	7436.33	7917.82	6922.02	6588.75	8984.96	8537.31	10157.9	7636.47	7397.74	8006.08
CSDE1	ENSG00000009307	13856.1	14922.1	13776.6	11373.6	11101.1	11395.3	14529.6	15073.3	15184.4	12909.1	13117.9	13208.2
UBE3C	ENSG00000009335	2370.7	2238.83	2069.5	1082.98	1152.16	1159.93	1212.58	922.398	1148.18	1520.67	1362.36	1397.32
REV3L	ENSG00000009413	734.228	691.05	605.365	1316.54	1533.54	1893.43	1985.74	1883.92	1820.64	1310.11	1325.62	1401.06
TENM1	ENSG00000009694	40.7905	42.994	35.1956	167.327	260.943	296.645	336.519	327.681	281.401	178.386	204.982	199.217
PAX7	ENSG00000009709	451.609	459.302	549.052	211.483	214.776	217.848	552.521	662.209	533.776	403.561	428.336	434.91
MASP2	ENSG00000009724	48.5601	38.7995	44.2459	116.199	135.49	143.687	87.1426	151.614	116.108	78.9577	105.392	97.2701
IYD	ENSG00000009765	0	0	0	0	0	0	1.8541	0	0.806308	0.974786	0	0
FAM76A	ENSG00000009780	159.277	160.441	158.883	226.589	210.762	199.308	276.261	234.757	257.212	213.478	194.346	202.022
TRAF3IP3	ENSG00000009790	36.9057	35.6536	40.2236	20.9159	22.0798	16.2228	20.3951	17.6067	25.8019	25.3444	24.1724	27.1234
POMT2	ENSG00000009830	474.918	483.42	501.789	649.554	561.028	535.351	422.734	395.174	413.636	488.368	459.276	459.227
VTA1	ENSG00000009844	1574.32	1578.19	1339.44	689.062	720.605	747.405	1080.94	1112.16	1156.25	1098.58	1082.93	1063.42
MLXIPL	ENSG00000009950	0	0	2.01118	10.4579	14.0508	9.27014	9.27049	10.7597	7.25677	5.84872	7.73518	5.61174
BAZ1B	ENSG00000009954	4579.22	4557.36	4544.26	2518.04	2415.73	2458.91	2482.64	3054.77	2408.44	3106.64	3183.03	3001.34
RANBP9	ENSG00000010017	1056.67	1086.38	983.466	671.632	675.442	661.656	791.7	783.5	756.317	818.82	809.294	775.355
ETV7	ENSG00000010030	0	0	3.01677	5.80996	3.01088	5.79384	3.7082	3.91261	5.64416	2.92436	1.9338	4.67645
SPRTN	ENSG00000010072	334.093	307.25	273.52	176.623	189.686	163.386	214.148	250.407	224.154	235.898	237.857	215.117
EEF1AKNMT	ENSG00000010165	813.867	817.934	822.572	446.205	363.313	414.839	383.798	317.9	381.384	531.258	472.813	514.409
DYRK4	ENSG00000010219	251.541	266.353	284.582	182.433	197.715	161.069	216.002	248.451	223.347	210.554	227.221	217.922
ZNF207	ENSG00000010244	3913.94	3905.11	3700.57	2311.2	2721.84	2770.61	3488.48	3309.09	3165.56	3178.78	3164.66	3116.38
UQCRC1	ENSG00000010256	1625.79	1785.82	1962.91	1792.96	1472.32	1507.56	1213.51	1310.72	1507.8	1470.95	1453.25	1597.47
STARD3NL	ENSG00000010270	935.267	1167.13	1014.64	808.747	802.902	743.929	851.031	755.134	893.389	837.341	865.374	860.466
CD9	ENSG00000010278	341.863	310.396	364.023	297.47	278.005	229.436	298.51	255.298	316.879	302.184	268.798	297.422
HHATL	ENSG00000010282	1.9424	2.09727	0	174.299	127.461	161.069	86.2155	84.1211	95.9506	79.9325	69.6166	80.4349
NCAPD2	ENSG00000010292	4584.07	4744.02	4763.48	1426.93	1296.69	1323.31	1474.93	1420.28	1359.44	2449.64	2342.79	2358.8
IFFO1	ENSG00000010295	232.117	200.289	278.548	603.074	537.945	521.446	409.756	419.627	385.415	389.914	372.256	375.986
GIPR	ENSG00000010310	1.9424	4.19454	2.01118	27.8878	13.0472	9.27014	9.27049	8.80337	7.25677	11.6974	8.70208	5.61174
PHF7	ENSG00000010318	98.0914	92.2798	104.581	60.4236	55.1995	57.9384	58.4041	73.3614	55.6352	70.1846	70.5835	69.2114
SEMA3G	ENSG00000010319	0	3.1459	0	42.9937	20.0726	24.3341	11.1246	10.7597	20.964	15.5966	10.6359	14.9646
NISCH	ENSG00000010322	1177.1	1091.63	1202.68	2369.3	2286.26	2308.27	1661.27	1511.25	1598.1	1638.62	1567.34	1611.5
STAB1	ENSG00000010327	191.327	230.699	277.543	112.713	99.3592	86.9076	70.4557	116.4	81.4371	119.899	141.167	141.229
FUZ	ENSG00000010361	343.805	350.244	373.074	302.118	230.834	272.31	239.179	217.15	237.861	283.663	253.327	280.587
SLC6A13	ENSG00000010379	5.82721	8.38907	8.04471	470.607	372.346	400.934	239.179	215.194	256.406	217.377	193.38	209.505
IDS	ENSG00000010404	1566.55	1578.19	1500.34	1103.89	1153.17	1192.37	1391.5	1279.42	1218.33	1320.84	1277.27	1257.03
PRSS3	ENSG00000010438	2.9136	1.04863	1.00559	5.80996	5.01814	2.31754	0.927049	0.978152	1.61262	2.92436	1.9338	1.87058
ZNF200	ENSG00000010539	243.772	282.083	242.347	165.003	156.566	161.069	171.504	156.504	195.933	188.134	188.545	194.54
CD4	ENSG00000010610	7.76961	8.38907	13.0727	12.7819	23.0834	25.4929	59.3311	43.0387	45.1532	27.294	24.1724	28.0587
LRRC23	ENSG00000010626	97.1202	105.912	116.648	117.361	101.366	88.0664	95.486	150.635	120.946	98.4534	115.061	106.623
BTK	ENSG00000010671	1.9424	3.1459	2.01118	2.32399	4.01451	1.15877	2.78115	4.89076	1.61262	1.94957	3.86759	1.87058
HFE	ENSG00000010704	68.9553	58.7235	54.3018	79.0155	93.3374	85.7488	85.2885	58.6891	96.7569	75.0585	67.6829	77.629
SCMH1	ENSG00000010803	549.7	524.317	615.421	543.813	489.77	514.493	508.023	623.083	553.934	513.712	524.059	543.403
FYN	ENSG00000010810	1192.64	1316.04	1317.32	2023.03	1839.65	1727.72	1939.39	2212.58	2074.63	1644.46	1723.98	1675.1
HIVEP2	ENSG00000010818	641.964	595.624	577.208	580.996	516.868	651.228	626.685	684.707	524.1	596.569	574.337	556.497
FMO1	ENSG00000010932	5.82721	4.19454	5.02795	510.115	529.916	539.986	323.54	323.768	362.032	258.318	278.467	287.134
ELOA	ENSG00000011007	2295.92	2452.75	2404.36	1196.85	1162.2	1152.97	1238.54	1253.99	1215.11	1537.24	1540.27	1525.46
LYPLA2	ENSG00000011009	538.046	487.615	603.353	551.947	461.669	420.633	386.579	406.911	441.857	469.847	432.203	471.386
CLCN6	ENSG00000011021	466.177	458.253	473.632	1063.22	1059.83	1051	772.232	759.046	753.898	724.266	730.975	721.108
MRC2	ENSG00000011028	2137.61	1989.26	2354.08	6131.84	5646.41	5752.12	3529.27	3046.94	3373.59	3667.15	3428.62	3582.16
NME1-NME2	ENSG00000011052	7154.84	7830.15	7687.73	4073.95	3519.72	3205.15	3705.41	3703.28	3976.71	4832.01	4757.14	4783.07
SLC6A7	ENSG00000011083	1.9424	0	0	23.2399	32.1161	17.3815	17.6139	29.3446	16.1262	13.647	20.3049	11.2235
TSPAN9	ENSG00000011105	609.915	622.889	673.745	2643.53	2376.59	2492.51	1649.22	1447.67	1835.16	1521.64	1431.98	1589.06
BTBD7	ENSG00000011114	912.929	844.15	821.566	694.872	784.837	777.533	945.59	725.789	811.952	831.493	750.313	778.161
APBA3	ENSG00000011132	83.5233	84.9393	113.632	163.841	182.66	169.18	114.027	99.7715	103.207	114.05	117.962	120.652
MKS1	ENSG00000011143	198.125	213.921	241.341	196.377	195.707	194.673	148.328	147.701	141.104	173.512	176.942	181.446
ABHD5	ENSG00000011198	234.06	230.699	188.045	63.9096	71.2576	66.0498	75.091	57.711	73.374	122.823	113.127	104.752
ANOS1	ENSG00000011201	83.5233	92.2798	76.4248	124.333	140.508	137.893	285.531	222.041	224.154	162.789	146.968	147.776
AKAP8L	ENSG00000011243	657.503	713.071	758.214	1402.53	1225.43	1286.23	846.396	1106.29	895.808	908.501	977.534	927.807
MBTD1	ENSG00000011258	341.863	310.396	257.431	519.411	530.919	537.668	762.961	765.893	720.839	527.359	518.257	503.186
UTP18	ENSG00000011260	1049.87	1212.22	1022.68	383.458	399.444	398.616	482.992	499.836	495.879	627.762	665.226	616.356
RNF216	ENSG00000011275	1065.41	1054.93	1151.4	1000.48	947.425	903.839	855.666	876.425	841.785	935.795	917.586	925.936
TTC19	ENSG00000011295	687.611	759.211	635.532	547.299	594.148	644.275	600.728	558.525	609.569	593.645	608.179	606.067
PTBP1	ENSG00000011304	8941.85	8648.08	9251.42	3167.59	3021.92	2840.14	2576.27	2831.75	2716.45	4780.35	4561.82	4682.99
DPF1	ENSG00000011332	199.096	238.04	270.503	249.828	208.755	201.626	206.732	222.041	187.063	208.604	213.684	210.44
SYT7	ENSG00000011347	37.8769	33.5563	43.2403	262.61	260.943	281.581	241.96	245.516	202.383	170.588	175.009	167.417
LARS2	ENSG00000011376	626.425	657.493	586.258	513.601	548.984	544.621	432.932	409.846	430.568	504.939	513.423	494.768
PIK3C2A	ENSG00000011405	1246.05	1169.23	952.293	592.616	846.058	913.109	1203.31	1199.21	1102.22	1004.03	1025.88	967.089
PLAUR	ENSG00000011422	2147.33	2279.73	2243.47	508.953	445.611	523.763	294.802	276.817	282.208	964.063	934.99	945.578
ANLN	ENSG00000011426	6386.62	6551.86	6123.03	692.548	742.685	723.071	881.623	1135.63	842.592	2639.72	2626.09	2418.66
WIZ	ENSG00000011451	1504.39	1414.61	1676.32	1270.06	1227.44	1134.43	964.131	1097.49	992.565	1196.06	1190.25	1208.39
RABGAP1	ENSG00000011454	1339.29	1325.47	1226.82	1411.82	1373.97	1479.75	1450.83	1443.75	1367.5	1351.05	1324.65	1307.53
DCN	ENSG00000011465	3908.11	4334	4681.02	26650.3	27067.8	26174.2	20343.2	20687.9	21612.3	15890	16841.4	16850.2
QPCTL	ENSG00000011478	220.463	211.824	220.224	153.383	119.432	137.893	114.027	106.619	120.14	156.941	138.266	151.517
PPP5C	ENSG00000011485	2030.78	2102.51	2332.97	1403.69	1416.12	1323.31	1125.44	1110.2	1095.77	1466.08	1466.78	1503.01
CEP68	ENSG00000011523	400.135	391.14	373.074	548.461	625.26	586.337	751.837	743.396	748.254	550.754	565.635	563.044
MAP4K3	ENSG00000011566	646.82	613.451	569.163	411.346	497.799	449.602	693.433	628.952	616.019	574.149	555.966	535.921
ZBTB32	ENSG00000011590	2.9136	1.04863	1.00559	4.64797	3.01088	4.63507	2.78115	2.93446	2.41892	2.92436	1.9338	2.80587
TYROBP	ENSG00000011600	0	1.04863	0	0	0	0	0	0	0	0	0	0
TMEM159	ENSG00000011638	121.4	131.079	121.676	356.732	335.212	320.979	351.351	214.215	346.712	263.192	218.519	258.14
GABRA3	ENSG00000011677	44.6753	39.8481	35.1956	67.3956	68.2467	66.0498	56.55	73.3614	58.0542	53.6132	58.0139	51.4409
BRCA1	ENSG00000012048	1081.92	1149.3	1063.91	252.152	293.059	317.502	326.321	383.436	315.266	546.855	573.37	536.856
ERCC1	ENSG00000012061	2154.12	2211.57	2342.02	953.996	963.483	943.237	819.511	981.087	928.867	1275.02	1312.08	1339.33
CD22	ENSG00000012124	0	0	0	12.7819	10.0363	9.27014	6.48934	13.6941	9.67569	5.84872	7.73518	6.54703
SEMA3B	ENSG00000012171	42.7329	39.8481	51.285	340.464	308.114	330.249	291.093	281.708	333.811	211.529	204.015	233.822
MBTPS2	ENSG00000012174	773.076	858.831	657.655	598.426	641.318	648.91	684.162	582.001	623.276	665.779	661.358	619.162
PRICKLE3	ENSG00000012211	37.8769	44.0426	62.3465	77.8535	49.1778	49.827	28.7385	54.7765	49.9911	44.8402	47.378	52.3762
LTF	ENSG00000012223	0	0	1.00559	1.16199	1.00363	0	0.927049	1.9563	1.61262	0.974786	0.966898	0.935289
EXTL3	ENSG00000012232	1299.47	1275.14	1354.53	1726.72	1580.71	1635.02	1418.38	1106.29	1311.86	1414.41	1263.74	1367.39
NR1H4	ENSG00000012504	0.971202	0	0	0	0	0	0	0	0	0	0	0
ELOVL5	ENSG00000012660	2226.97	2293.36	2039.33	1818.52	1817.57	1782.18	2023.75	1908.38	2088.34	1963.22	1917.36	1919.21
ALOX5	ENSG00000012779	1.9424	0	0	0	1.00363	2.31754	0.927049	0	0.806308	0.974786	0	0.935289
KDM5D	ENSG00000012817	436.069	394.286	357.99	1017.91	1005.64	1008.13	810.241	777.631	739.384	714.518	700.034	667.797
CALCOCO1	ENSG00000012822	348.661	335.563	392.18	1287.49	1228.44	1194.69	846.396	1135.63	865.168	773.005	872.142	777.225
UBR7	ENSG00000012963	1443.21	1564.56	1379.67	584.482	561.028	524.922	674.892	688.619	617.632	883.156	887.612	808.09
MAP4K5	ENSG00000012983	1212.06	1120.99	998.55	643.744	701.536	767.104	908.508	983.043	866.781	903.627	893.414	851.113
EHD3	ENSG00000013016	232.117	264.256	248.381	275.392	216.784	235.23	212.294	199.543	178.194	229.075	216.585	209.505
PSMC4	ENSG00000013275	1976.4	2154.94	2124.81	1199.18	954.45	981.476	883.478	1097.49	978.052	1306.21	1330.45	1300.99
MAN2B2	ENSG00000013288	447.724	471.885	527.934	869.171	939.396	892.251	565.5	583.957	586.186	590.72	639.119	630.385
SLC7A14	ENSG00000013293	114.602	123.739	88.4918	65.0716	60.2177	61.4147	99.1942	73.3614	78.2119	91.6299	81.2194	73.8879
CLDN11	ENSG00000013297	2936.91	3073.55	3141.46	2522.69	2433.8	2462.38	2072.88	1980.76	2123.82	2414.55	2378.57	2457.94
SLC25A39	ENSG00000013306	1060.55	1233.19	1266.04	905.193	732.648	706.848	527.491	598.629	655.528	792.501	811.227	836.149
MVP	ENSG00000013364	1457.77	1402.02	1626.04	1286.33	1071.87	1009.29	646.153	550.7	695.037	1074.21	956.262	1044.72
NUB1	ENSG00000013374	894.477	967.889	958.326	683.252	806.917	760.152	804.678	987.934	755.511	772.031	881.811	794.061
PGM3	ENSG00000013375	1692.8	1740.73	1546.6	1235.2	1323.79	1429.92	1412.82	1407.56	1415.07	1406.62	1424.24	1411.35
RWDD2A	ENSG00000013392	98.0914	87.0366	91.5086	168.489	171.62	165.704	181.702	156.504	175.775	143.294	133.432	141.229
CLK1	ENSG00000013441	576.894	552.63	540.001	1188.72	1374.97	1376.62	1340.51	1197.26	1301.38	995.257	1005.57	1040.98
POLR3B	ENSG00000013503	532.218	575.7	592.292	458.987	402.455	454.237	389.361	473.426	397.51	442.553	462.177	459.227
ANGEL1	ENSG00000013523	159.277	171.976	197.095	361.38	444.607	454.237	306.853	325.725	283.82	262.217	302.639	292.746
RNF14	ENSG00000013561	880.88	887.144	761.231	529.869	578.09	608.353	698.068	677.86	704.713	687.224	681.663	672.473
DNASE1L1	ENSG00000013563	284.562	306.201	282.571	217.293	167.606	130.941	113.1	140.854	137.879	195.932	194.346	175.834
DDX11	ENSG00000013573	484.63	480.274	519.89	388.106	379.371	403.251	258.647	282.686	250.762	361.646	362.587	366.633
HEBP1	ENSG00000013583	295.245	262.158	308.716	350.922	357.292	339.519	333.738	309.096	376.546	313.881	296.838	332.963
GPRC5A	ENSG00000013588	552.614	500.198	566.147	67.3956	65.2358	63.7322	42.6442	36.1916	54.8289	218.352	186.611	214.181
MAMLD1	ENSG00000013619	291.36	286.277	281.565	534.517	605.188	638.481	584.041	560.481	527.325	451.326	467.012	462.968
CD6	ENSG00000013725	5.82721	1.04863	4.02236	10.4579	4.01451	8.11138	2.78115	1.9563	4.83785	5.84872	1.9338	5.61174
TACC3	ENSG00000013810	3338.99	3438.47	3427.05	721.598	639.311	604.877	632.247	742.418	680.524	1540.16	1506.43	1488.05
UFL1	ENSG00000014123	793.472	869.318	736.091	544.975	654.365	623.417	850.104	863.709	851.461	715.493	761.916	724.849
POLA2	ENSG00000014138	955.662	1091.63	1137.32	679.766	559.021	579.384	728.66	695.466	751.479	765.207	744.511	798.737
ZC3H3	ENSG00000014164	382.653	329.271	383.129	307.928	298.077	230.595	211.367	237.691	217.703	288.537	275.566	264.687
CAPN1	ENSG00000014216	1286.84	1318.13	1481.23	1871.97	1588.74	1589.83	1344.22	1352.78	1441.68	1425.14	1361.39	1444.09
ACP3	ENSG00000014257	4.85601	3.1459	4.02236	23.2399	15.0544	16.2228	16.6869	20.5412	12.9009	13.647	12.5697	10.2882
MDH1	ENSG00000014641	1867.62	2129.78	1924.7	2371.63	2148.77	2207.45	2406.62	1957.28	2578.57	2131.86	1989.88	2187.64
SLC30A9	ENSG00000014824	1349	1385.25	1201.68	854.065	913.301	969.889	1569.49	1626.67	1503.76	1239.93	1255.03	1214.94
MTMR11	ENSG00000014914	138.882	146.809	131.732	598.426	560.024	648.91	206.732	159.439	170.131	286.587	277.5	281.522
COX15	ENSG00000014919	667.215	659.591	619.443	680.928	584.111	636.164	718.463	628.952	661.172	665.779	597.543	619.162
CCDC88C	ENSG00000015133	203.952	213.921	198.101	287.012	307.11	326.773	300.364	334.528	273.338	253.444	274.599	255.334
YAF2	ENSG00000015153	193.269	155.198	161.9	168.489	162.588	163.386	323.54	347.244	311.235	225.176	214.651	214.181
ZMYND11	ENSG00000015171	1464.57	1410.41	1339.44	849.417	927.352	958.301	1181.99	1448.64	1192.53	1141.47	1208.62	1134.51
WAS	ENSG00000015285	8.74081	7.34044	8.04471	12.7819	9.03265	12.7464	6.48934	14.6723	10.482	8.77307	9.66898	10.2882
DPEP1	ENSG00000015413	0	0	0	0	1.00363	1.15877	1.8541	1.9563	1.61262	0.974786	0.966898	0.935289
BID	ENSG00000015475	326.324	326.125	325.811	501.981	399.444	376.6	400.485	439.19	441.857	389.914	373.223	373.18
MATR3	ENSG00000015479	7176.21	7598.4	6970.74	6238.74	6165.29	6644.37	8048.64	8505.04	8093.72	6966.8	7117.34	7078.27
NPC1L1	ENSG00000015520	0	4.19454	3.01677	0	0	0	0	1.9563	0	0	1.9338	0.935289
XYLT2	ENSG00000015532	486.572	422.599	564.135	713.464	669.42	612.988	479.284	450.928	483.785	530.284	493.118	526.568
RGPD5	ENSG00000015568	0	1.04863	0	0	0	0	0.927049	0.978152	0.806308	0	0.966898	0
STMN4	ENSG00000015592	232.117	249.575	233.297	310.252	283.023	289.692	279.042	304.205	299.947	262.217	267.831	266.557
NUDCD3	ENSG00000015676	1270.33	1292.97	1325.37	1093.44	1029.72	1006.97	948.371	848.058	939.349	1063.49	1007.51	1044.72
ISL1	ENSG00000016082	9.71202	3.1459	5.02795	4.64797	6.02177	9.27014	5.56229	7.82522	6.45046	6.8235	5.80139	6.54703
CHDH	ENSG00000016391	58.2721	59.7721	57.3186	23.2399	44.1596	44.0332	36.1549	38.1479	45.1532	38.9914	45.4442	46.7645
IL20RA	ENSG00000016402	26.2224	35.6536	26.1453	128.981	122.443	107.765	142.766	123.247	159.649	94.5542	90.8884	99.1407
CLCA1	ENSG00000016490	0.971202	0	0	0	0	0	0	0	0	0	0	0
CLCA4	ENSG00000016602	0	0	0	0	0	0	0	0	0	0	0	0
GLT8D1	ENSG00000016864	816.78	898.679	852.74	969.102	936.385	968.73	844.541	763.937	823.24	840.266	828.631	843.631
ATP2C1	ENSG00000017260	1448.06	1436.63	1341.46	1437.39	1455.26	1531.89	1481.42	1290.18	1352.18	1405.64	1334.32	1350.56
IGF1	ENSG00000017427	4.85601	5.24317	10.0559	546.137	646.336	706.848	987.307	1127.81	899.84	500.065	581.106	541.533
SLC38A5	ENSG00000017483	291.36	308.298	352.962	47.6417	34.1233	30.128	26.8844	23.4757	35.4775	119.899	113.127	130.941
RALBP1	ENSG00000017797	1250.91	1238.44	1323.36	1091.11	1039.76	1017.4	1099.48	1264.75	1139.31	1109.31	1131.27	1124.22
RUFY3	ENSG00000018189	889.621	852.539	759.22	1045.79	1259.55	1326.79	1513.87	1351.81	1357.82	1121	1111.93	1117.67
CNTN1	ENSG00000018236	607.972	604.013	491.733	184.757	195.707	227.119	214.148	200.521	188.676	330.452	314.242	286.199
SLC11A1	ENSG00000018280	3.88481	3.1459	3.01677	4.64797	3.01088	4.63507	7.41639	2.93446	4.83785	4.87393	2.90069	3.74116
WWTR1	ENSG00000018408	2780.55	2613.2	2484.81	7317.07	7631.59	7701.17	7702.85	6571.23	6985.85	5676.18	5419.46	5543.46
AGPS	ENSG00000018510	1542.27	1662.08	1399.78	690.224	814.946	775.216	1135.63	996.737	1046.59	1107.36	1101.3	1047.52
ZNF806	ENSG00000018607	0	0	0	0	0	3.4763	0	3.91261	0	0	0.966898	0.935289
STEEP1	ENSG00000018610	330.209	361.779	333.856	217.293	173.628	170.339	165.942	190.74	192.708	229.075	230.122	223.534
ATP1A2	ENSG00000018625	157.335	171.976	221.23	16187.7	15665.6	15836.9	12122.1	12157.5	11854.3	8827.66	9089.81	8913.31
TTC27	ENSG00000018699	730.344	775.989	652.627	343.95	324.172	351.107	327.248	357.026	354.775	455.225	460.243	433.974
ZNF582	ENSG00000018869	46.6177	49.2858	48.2683	65.0716	62.2249	66.0498	63.9664	47.9295	76.5993	56.5376	51.2456	62.6644
VSIG2	ENSG00000019102	2.9136	1.04863	2.01118	0	1.00363	1.15877	0.927049	2.93446	0.806308	0.974786	1.9338	0.935289
PHLDB1	ENSG00000019144	2013.3	1946.26	2265.59	3975.18	3788.7	4008.18	2698.64	2930.54	2710	2731.35	2780.8	2828.31
MARCO	ENSG00000019169	1.9424	1.04863	2.01118	3.48598	7.0254	5.79384	1.8541	6.84707	3.22523	1.94957	4.83449	3.74116
CYP24A1	ENSG00000019186	8.74081	8.38907	19.1062	2.32399	4.01451	1.15877	3.7082	0.978152	0.806308	4.87393	3.86759	6.54703
PRDM11	ENSG00000019485	226.29	219.164	242.347	866.847	896.24	983.794	949.298	856.862	890.164	651.157	637.186	683.696
SYT13	ENSG00000019505	269.994	251.672	240.336	250.99	255.925	267.675	342.081	251.385	308.816	280.738	242.691	265.622
SNAI2	ENSG00000019549	1906.47	1964.09	2012.18	883.115	882.189	882.981	849.177	1261.82	891.777	1182.42	1302.41	1206.52
CD74	ENSG00000019582	5.82721	10.4863	16.0894	2.32399	14.0508	10.4289	6.48934	17.6067	8.86939	4.87393	13.5366	11.2235
HGF	ENSG00000019991	39.8193	36.7022	29.1621	12.7819	5.01814	6.95261	12.0516	5.86891	5.64416	21.4453	14.5035	13.0941
ZRANB1	ENSG00000019995	837.176	805.351	740.114	673.956	692.503	711.483	888.113	945.873	840.979	779.829	781.253	746.361
NCDN	ENSG00000020129	565.239	513.831	577.208	827.339	707.558	716.119	492.263	454.841	496.686	592.67	534.695	563.979
ADGRA2	ENSG00000020181	900.304	947.965	1072.96	3757.89	3700.38	3580.59	2420.52	2970.65	2692.26	2200.09	2458.82	2337.29
CCT8L1P	ENSG00000020219	0	0	1.00559	0	0	0	0.927049	0	0.806308	0	0	0.935289
ZFP64	ENSG00000020256	326.324	327.174	350.951	274.23	330.194	253.77	251.23	348.222	265.275	273.915	321.01	279.652
MNAT1	ENSG00000020426	621.569	600.867	614.415	210.321	263.954	212.055	320.759	379.523	316.073	379.192	394.494	369.439
SAMD4A	ENSG00000020577	1429.61	1307.65	1283.13	1033.01	1046.78	1198.17	1221.85	1031.95	1090.93	1195.09	1078.09	1141.99
RUNX3	ENSG00000020633	1.9424	2.09727	5.02795	0	0	1.15877	0	1.9563	1.61262	0.974786	0.966898	2.80587
MRE11	ENSG00000020922	638.079	694.196	615.421	268.42	284.027	347.63	404.193	390.283	389.447	429.881	433.17	434.91
PLEKHB1	ENSG00000021300	6.79841	8.38907	12.0671	23.2399	31.1125	19.6991	35.2279	52.8202	41.928	21.4453	29.9738	25.2528
SERPINB1	ENSG00000021355	90.3217	83.8907	110.615	190.567	205.744	195.832	202.097	183.893	211.253	154.016	152.77	168.352
CYP3A43	ENSG00000021461	0	0	0	1.16199	0	0	0.927049	1.9563	0	0.974786	0.966898	0
SLC7A9	ENSG00000021488	3.88481	2.09727	2.01118	6.97196	9.03265	8.11138	11.1246	8.80337	4.03154	6.8235	6.76829	4.67645
SPAST	ENSG00000021574	433.156	435.183	328.828	369.514	416.506	418.315	572.916	487.12	471.69	449.376	428.336	396.563
NRXN3	ENSG00000021645	314.669	276.839	311.733	201.025	200.726	225.96	194.68	211.281	223.347	230.05	219.486	244.111
OSBPL5	ENSG00000021762	407.905	383.8	455.532	398.564	366.324	376.6	279.969	299.315	290.271	346.049	334.547	354.475
AQR	ENSG00000021776	1542.27	1561.42	1436.99	917.974	1015.67	1037.1	1200.53	1169.87	1134.48	1193.14	1191.22	1163.5
CPS1	ENSG00000021826	226.29	208.678	195.084	339.302	332.201	346.472	436.64	356.047	389.447	323.629	288.136	303.969
C8B	ENSG00000021852	0	0	0	0	0	0	0	0	0	0	0	0
FHL1	ENSG00000022267	1709.31	1802.6	1854.31	2507.58	2327.41	2267.71	1915.28	1853.6	2014.16	1944.7	1912.52	1964.11
RTF2	ENSG00000022277	1416.98	1548.83	1463.13	1288.65	1042.77	1010.45	1233.9	1364.52	1288.48	1267.22	1260.83	1223.36
GABRA1	ENSG00000022355	0.971202	0	1.00559	1.16199	0	0	0	0	0.806308	0.974786	0	0.935289
NLRP2	ENSG00000022556	0	0	0	0	0	0	0	0	0	0	0	0
SLC45A4	ENSG00000022567	119.458	112.204	124.693	154.545	158.573	149.481	109.392	92.9245	108.045	121.848	116.028	120.652
RNF10	ENSG00000022840	2088.08	2143.41	2248.5	1933.56	1729.25	1743.95	1699.28	1712.74	1758.56	1834.55	1778.13	1846.26
ZNF839	ENSG00000022976	253.484	268.45	273.52	206.835	174.631	183.085	136.276	162.373	178.194	190.083	192.413	202.958
ZDHHC6	ENSG00000023041	564.268	616.597	569.163	555.433	564.039	575.908	578.478	631.886	524.1	546.855	579.172	534.05
GRAMD1B	ENSG00000023171	74.7825	88.0853	87.4863	553.109	554.003	553.891	442.202	404.955	400.735	334.352	338.414	331.092
RNH1	ENSG00000023191	1765.64	1800.5	2127.83	1279.35	1070.87	1053.32	752.764	745.352	910.322	1212.63	1142.87	1295.38
NDUFS1	ENSG00000023228	2459.08	2579.64	2521.01	2222.89	2144.75	2165.74	2356.56	2353.43	2255.24	2270.28	2256.74	2236.28
RB1CC1	ENSG00000023287	1006.16	951.111	805.477	531.031	611.209	711.483	923.341	984.999	868.394	809.072	813.161	777.225
ERP44	ENSG00000023318	1043.07	1169.23	1057.88	852.903	978.537	834.313	793.554	990.868	813.565	865.61	999.772	867.013
ALAS1	ENSG00000023330	651.676	697.342	747.153	791.317	667.413	633.846	617.415	641.668	637.79	656.031	640.086	649.091
BIRC3	ENSG00000023445	25.2512	23.0699	19.1062	5.80996	2.00726	1.15877	10.1975	14.6723	9.67569	13.647	12.5697	10.2882
AKAP11	ENSG00000023516	1263.53	1271.99	1071.96	1121.32	1282.64	1514.51	1652.93	1388.98	1388.46	1315.96	1260.83	1276.67
GLRX2	ENSG00000023572	225.319	206.581	186.034	73.2056	77.2793	78.7962	127.933	107.597	133.041	140.369	123.763	130.005
SNAPC1	ENSG00000023608	612.828	623.937	533.968	125.495	143.519	148.322	239.179	253.341	201.577	323.629	321.01	283.393
DERA	ENSG00000023697	422.473	534.803	415.308	197.539	179.649	172.656	244.741	236.713	237.055	282.688	299.738	266.557
STRAP	ENSG00000023734	4824.93	5147.74	4617.67	1901.02	1850.69	1822.74	2253.66	2243.88	2210.9	2936.06	2916.16	2776.87
ABCC2	ENSG00000023839	25.2512	32.5077	28.1565	30.2118	34.1233	41.7156	52.8418	44.0169	40.3154	35.0923	35.7752	35.541
DEF6	ENSG00000023892	24.28	20.9727	30.1677	34.8598	29.1052	19.6991	17.6139	16.6286	20.964	24.3697	21.2718	22.4469
PLEKHO1	ENSG00000023902	1130.48	1109.45	1249.95	902.869	768.779	765.946	658.205	673.947	771.637	861.711	810.26	892.266
GCLM	ENSG00000023909	547.758	564.165	465.588	99.9314	99.3592	114.718	161.306	116.4	150.78	268.066	243.658	233.822
UBR2	ENSG00000024048	712.862	726.703	636.538	743.675	840.037	946.713	981.745	833.386	835.335	790.551	767.717	775.355
EHD2	ENSG00000024422	3934.34	3629.32	4299.9	3353.51	3277.85	3068.42	2381.59	3584.93	2697.91	3089.1	3349.33	3201.5
DEPDC1	ENSG00000024526	1103.28	1118.89	823.577	108.065	152.551	134.417	289.239	272.905	268.501	501.04	482.482	395.627
CCDC28A	ENSG00000024862	71.8689	87.0366	86.4807	38.3458	35.127	28.9692	32.4467	41.0824	32.2523	45.8149	51.2456	46.7645
RRAGD	ENSG00000025039	431.213	397.432	403.241	815.719	845.055	799.55	1212.58	1123.9	1145.76	797.375	763.849	782.837
HSF2	ENSG00000025156	339.921	350.244	361.006	389.268	364.317	336.043	468.16	457.775	518.456	386.99	375.156	403.11
PHF20	ENSG00000025293	1141.16	1246.83	1109.16	806.423	802.902	871.393	886.259	827.517	897.421	918.248	913.718	925.001
HSD17B6	ENSG00000025423	42.7329	38.7995	40.2236	4.64797	14.0508	4.63507	5.56229	3.91261	7.25677	17.5461	17.4042	16.8352
NR1H3	ENSG00000025434	88.3793	79.6962	92.5142	409.022	344.244	377.758	207.659	208.346	222.541	216.403	204.015	216.052
TYMP	ENSG00000025708	26.2224	29.3618	35.1956	66.2336	61.2213	62.5735	20.3951	28.3664	44.3469	34.1175	37.709	44.8939
NCAPH2	ENSG00000025770	905.16	942.722	992.516	453.177	402.455	419.474	359.695	231.822	353.969	555.628	495.052	557.432
TOMM34	ENSG00000025772	648.763	699.439	666.706	298.632	285.03	249.135	308.707	360.938	311.235	408.435	425.435	393.757
SEC63	ENSG00000025796	2310.49	2384.59	2266.6	1780.17	1922.95	1993.08	2188.76	2556.89	2198.8	2038.28	2192.92	2089.44
KPNA6	ENSG00000025800	2739.76	2956.1	2726.15	1741.83	1646.95	1637.34	1641.8	1522.98	1571.49	1978.82	1939.6	1893.03
VIM	ENSG00000026025	95194.3	98417.4	97138.9	46427.4	43703	42809.5	45080.5	53374.8	49010.6	60631.7	61869.9	60584.3
RTEL1-TNFRSF6B	ENSG00000026036	628.367	558.922	633.521	449.691	344.244	427.585	251.23	215.194	246.73	424.032	352.918	406.851
FAS	ENSG00000026103	305.928	293.618	291.621	220.779	242.878	239.865	201.17	180.958	226.573	234.923	228.188	242.24
RNASET2	ENSG00000026297	58.2721	59.7721	67.3745	231.237	238.863	202.784	328.175	324.747	385.415	198.856	202.082	224.469
CD44	ENSG00000026508	7173.29	7211.46	6796.78	626.314	687.485	665.133	724.025	774.697	775.668	2828.83	2692.81	2586.07
KCNG1	ENSG00000026559	541.93	535.852	543.018	99.9314	95.3446	76.4787	69.5287	67.4925	62.892	233.949	217.552	213.246
AGPAT4	ENSG00000026652	348.661	340.806	299.666	721.598	758.743	738.135	768.523	716.008	697.456	587.796	584.006	561.174
SLAMF7	ENSG00000026751	0	1.04863	0	0	0	0	0	0	0	0	0	0
BTN3A1	ENSG00000026950	72.8401	67.1126	60.3353	242.857	241.874	190.038	183.556	200.521	179.807	156.941	164.373	139.358
MIPEP	ENSG00000027001	286.504	348.146	301.677	177.785	182.66	186.562	203.024	187.805	202.383	216.403	227.221	221.664
PRKCH	ENSG00000027075	152.479	141.566	119.665	39.5078	42.1524	41.7156	24.1033	19.563	35.4775	70.1846	63.8153	61.7291
INSRR	ENSG00000027644	0	1.04863	3.01677	6.97196	6.02177	12.7464	3.7082	2.93446	3.22523	2.92436	2.90069	5.61174
IFNGR1	ENSG00000027697	548.729	562.068	484.694	643.744	758.743	765.946	660.059	639.712	671.654	594.619	627.517	616.356
B4GALT7	ENSG00000027847	259.311	231.748	269.498	248.666	198.718	242.182	156.671	135.963	169.325	211.529	179.843	214.181
SH2D2A	ENSG00000027869	5.82721	6.2918	3.01677	0	1.00363	1.15877	0	0	0.806308	1.94957	1.9338	1.87058
VRK2	ENSG00000028116	532.218	552.63	458.549	166.165	229.831	235.23	246.595	268.014	242.699	310.957	331.646	299.293
TNFRSF1B	ENSG00000028137	23.3088	16.7781	30.1677	529.869	456.651	470.46	372.674	390.283	355.582	286.587	280.4	273.104
VEZT	ENSG00000028203	1129.51	1154.55	1139.33	1211.96	1353.89	1362.71	1500.89	1624.71	1452.16	1242.85	1324.65	1281.35
POU2F2	ENSG00000028277	136.939	162.538	154.861	102.255	96.3483	99.654	83.4344	112.488	72.5677	103.327	117.962	102.882
BRD9	ENSG00000028310	1136.31	1140.91	1130.28	898.221	818.96	775.216	629.466	727.745	684.555	851.963	853.771	823.99
SNX1	ENSG00000028528	1228.57	1227.95	1187.6	1397.88	1432.18	1426.44	1433.22	1426.15	1353.79	1304.26	1307.25	1275.73
TBPL1	ENSG00000028839	374.884	434.134	335.867	191.729	206.747	214.372	266.99	230.844	255.6	272.94	275.566	260.946
ARNTL2	ENSG00000029153	438.012	471.885	364.023	38.3458	55.1995	53.3033	56.55	68.4707	56.4416	177.411	185.644	148.711
BCLAF1	ENSG00000029363	3014.61	3014.82	2506.93	1737.18	2076.51	2084.62	3020.33	3404.95	2965.6	2552.96	2715.05	2485.06
SLC39A9	ENSG00000029364	1348.03	1435.58	1308.27	1119	1202.35	1210.91	1112.46	1064.23	1113.51	1154.15	1177.68	1161.63
ANK1	ENSG00000029534	173.845	165.684	200.112	953.996	989.577	885.299	972.474	1322.46	1011.11	665.779	804.459	691.179
IBSP	ENSG00000029559	0	0	0	0	0	0	0	0	0	0	0	0
TFB1M	ENSG00000029639	155.392	185.608	147.822	77.8535	76.2757	85.7488	93.6319	74.3396	109.658	106.252	106.359	111.299
RABEP1	ENSG00000029725	1940.46	1996.6	1844.25	1479.22	1581.72	1635.02	2020.97	2158.78	2065.76	1771.19	1833.24	1810.72
HMGB3	ENSG00000029993	1955.03	2259.81	2066.49	778.535	777.812	711.483	952.079	1116.07	944.187	1205.81	1312.08	1197.17
NUP160	ENSG00000030066	1722.91	1760.66	1674.31	971.426	1129.08	1251.47	1335.88	1092.6	1198.98	1315.96	1263.74	1319.69
BAK1	ENSG00000030110	226.29	231.748	278.548	153.383	132.479	121.671	136.276	137.919	162.874	166.688	159.538	182.381
MUSK	ENSG00000030304	119.458	118.496	115.643	405.536	496.796	519.128	360.622	330.616	295.109	279.764	304.573	289.94
IKZF2	ENSG00000030419	251.541	207.63	167.933	131.305	159.577	184.244	288.312	198.565	200.771	222.251	180.81	179.576
GRN	ENSG00000030582	831.349	782.281	902.013	1539.64	1345.86	1254.95	695.287	788.391	811.146	952.366	932.09	930.613
FAM13B	ENSG00000031003	441.897	466.642	371.062	708.816	897.243	873.711	933.538	962.502	940.961	673.577	748.379	713.626
ARHGAP31	ENSG00000031081	798.328	783.33	826.594	528.707	565.042	534.192	591.457	589.826	542.645	621.914	616.881	609.809
CENPQ	ENSG00000031691	140.824	143.663	125.699	32.5358	36.1306	38.2393	52.8418	67.4925	57.2479	75.0585	78.3187	71.082
SARS1	ENSG00000031698	3434.17	3762.5	3943.92	2315.85	2048.4	2052.18	1823.51	2475.7	1959.33	2435.99	2629.96	2532.76
RANBP3	ENSG00000031823	1011.02	1057.02	1169.5	886.601	794.873	705.69	696.214	757.09	749.06	830.518	829.598	841.76
ARID4A	ENSG00000032219	268.052	279.985	270.503	457.825	486.76	491.318	566.427	766.871	590.217	416.234	495.052	444.262
EIPR1	ENSG00000032389	370.028	376.46	380.113	224.265	192.697	193.514	280.896	216.172	272.532	284.638	248.493	274.975
PNPLA6	ENSG00000032444	331.18	334.514	385.141	496.171	415.502	402.092	197.461	222.041	228.185	318.755	309.407	316.128
IFT88	ENSG00000032742	307.871	348.146	277.543	210.321	212.769	265.358	331.883	318.878	359.613	277.814	280.4	296.487
ALG1	ENSG00000033011	440.925	465.593	512.85	382.296	309.117	318.661	211.367	255.298	270.113	328.503	326.811	348.863
ZCCHC8	ENSG00000033030	389.452	436.232	411.286	296.308	363.313	314.026	334.665	408.868	385.415	330.452	385.792	361.022
ABCF2	ENSG00000033050	2563	2782.03	2773.41	1228.23	1073.88	1155.29	980.818	999.672	1005.47	1545.04	1529.63	1559.13
CHPF2	ENSG00000033100	756.566	675.32	723.019	1415.31	1217.4	1188.9	739.785	521.355	728.902	908.501	770.618	825.86
LRRC7	ENSG00000033122	122.371	123.739	89.4974	101.093	119.432	149.481	177.066	155.526	153.199	131.596	127.631	127.199
FUT8	ENSG00000033170	413.732	450.913	460.56	348.598	391.415	346.472	392.142	383.436	394.285	373.343	390.627	388.145
UBA6	ENSG00000033178	1495.65	1445.02	1131.29	481.065	661.391	706.848	936.319	811.866	794.213	963.089	924.354	848.307
GAB2	ENSG00000033327	352.546	343.952	342.906	484.551	408.477	498.27	440.348	546.787	411.217	407.461	416.733	399.369
ATP6V0A1	ENSG00000033627	897.39	918.603	917.097	1386.26	1359.92	1495.97	980.818	951.742	954.669	1031.32	1032.65	1055.94
PIAS1	ENSG00000033800	760.451	777.038	747.153	1382.77	1545.59	1639.66	1777.15	2014.99	1633.58	1264.3	1399.1	1304.73
SLC4A7	ENSG00000033867	1173.21	1171.32	861.79	448.529	547.981	603.718	684.162	537.006	630.533	757.409	712.604	673.408
APBA2	ENSG00000034053	481.716	507.539	544.024	584.482	527.908	471.619	469.087	514.508	482.172	489.343	495.052	481.674
MAP2K3	ENSG00000034152	599.231	572.554	562.124	239.371	184.668	186.562	158.525	143.788	195.933	322.654	282.334	300.228
EFCAB1	ENSG00000034239	11.6544	7.34044	6.03353	4.64797	5.01814	13.9052	17.6139	18.5849	15.3199	11.6974	9.66898	11.2235
TMSB10	ENSG00000034510	24887	28797.6	29986.7	11223.7	9759.28	9014.06	10694.4	13454.5	12442.9	15213.5	16417.9	16533.1
ASTE1	ENSG00000034533	137.911	104.863	132.738	119.685	118.428	90.3839	89.9237	119.335	93.5317	111.126	109.259	101.947
RNF19A	ENSG00000034677	545.815	537.949	474.638	470.607	596.155	546.938	862.155	915.551	909.515	616.065	658.457	646.285
PEX3	ENSG00000034693	303.015	338.709	330.839	131.305	135.49	105.448	180.775	177.046	153.199	201.781	205.949	189.864
GABARAPL2	ENSG00000034713	607.972	662.737	586.258	793.641	792.866	720.754	872.353	773.719	972.407	731.09	713.571	751.973
MYOC	ENSG00000034971	0	0	0	4.64797	0	1.15877	0	0	0	0.974786	0	0
SH3YL1	ENSG00000035115	190.355	186.657	193.073	375.324	417.509	368.488	482.992	407.89	457.177	338.251	325.845	335.769
FAM136A	ENSG00000035141	876.024	1014.03	896.985	463.635	451.633	489	530.272	617.214	584.573	608.267	660.391	635.997
VCL	ENSG00000035403	12560.5	12487.1	12217.9	5821.58	6016.75	6122.93	4625.97	4740.13	4555.64	7451.26	7331.99	7197.05
DEPDC1B	ENSG00000035499	348.661	350.244	383.129	104.579	127.461	96.1777	152.963	153.57	127.397	199.831	199.181	193.605
DAPK2	ENSG00000035664	30.1072	19.924	19.1062	36.0218	37.1342	34.763	28.7385	43.0387	34.6712	30.2184	31.9076	28.994
NSMAF	ENSG00000035681	882.822	935.381	849.723	460.149	460.665	499.429	524.71	558.525	471.69	608.267	619.782	579.879
ADSS2	ENSG00000035687	1042.1	1108.41	933.187	347.436	378.368	393.981	447.765	500.814	419.28	602.418	627.517	557.432
STAP1	ENSG00000035720	0.971202	0	0	0	1.00363	0	0	0	0.806308	0	0	0
TIMP2	ENSG00000035862	5322.18	5233.73	5617.22	4753.71	4492.24	4445.03	3427.3	3332.57	3489.7	4311.48	4148.96	4286.43
RFC1	ENSG00000035928	1739.42	1827.77	1660.23	833.149	837.026	942.078	1086.5	1330.29	1132.86	1196.06	1268.57	1206.52
TBC1D23	ENSG00000036054	553.585	535.852	429.387	425.289	524.897	506.382	641.518	600.586	661.979	529.309	530.827	525.633
CUL3	ENSG00000036257	2277.47	2445.41	2168.05	1455.98	1469.31	1567.81	1794.77	2027.71	1876.28	1798.48	1891.25	1819.14
MYOM2	ENSG00000036448	47.5889	37.7508	45.2515	3119.95	2639.54	2923.57	1796.62	1691.23	1782.75	1517.74	1416.51	1489.92
OTC	ENSG00000036473	0	0	2.01118	0	1.00363	0	0	0	0	0	0	0.935289
CYP46A1	ENSG00000036530	19.424	11.535	22.123	98.7694	112.406	110.083	120.516	120.313	106.433	76.0333	79.2856	77.629
ZZZ3	ENSG00000036549	974.115	1095.82	905.03	576.349	714.583	703.372	824.146	971.305	911.128	775.93	886.645	822.119
SLC18A1	ENSG00000036565	15.5392	8.38907	9.0503	68.5576	59.214	48.6683	23.1762	28.3664	27.4145	32.1679	30.9407	26.1881
USP2	ENSG00000036672	187.442	163.587	217.207	361.38	329.19	334.884	345.789	369.742	331.393	284.638	277.5	285.263
CASR	ENSG00000036828	0	0	0	0	0	0	0	0	0.806308	0	0	0
TUBG2	ENSG00000037042	147.623	127.933	124.693	298.632	288.041	253.77	165.942	187.805	163.681	191.058	193.38	170.223
RPL26L1	ENSG00000037241	352.546	415.259	371.062	267.258	225.816	192.355	280.896	438.212	322.523	291.461	344.216	291.81
FLT4	ENSG00000037280	16.5104	15.7295	18.1006	5.80996	3.01088	3.4763	9.27049	10.7597	6.45046	10.7226	9.66898	9.35289
NSUN2	ENSG00000037474	2244.45	2345.79	2085.59	1014.42	1033.74	1091.56	1013.26	919.463	918.385	1390.04	1355.59	1295.38
FBXO42	ENSG00000037637	419.559	473.983	520.895	521.735	450.629	454.237	509.877	408.868	503.942	464.973	425.435	478.868
MFAP3	ENSG00000037749	411.789	437.28	400.224	336.978	457.654	494.794	546.959	388.327	472.496	424.032	408.998	439.586
MRI1	ENSG00000037757	287.476	291.52	332.85	418.317	431.56	367.329	281.823	305.184	269.307	311.932	328.745	305.84
METTL1	ENSG00000037897	281.648	335.563	335.867	192.891	166.602	142.528	148.328	158.461	138.685	199.831	208.85	196.411
HOXC8	ENSG00000037965	528.334	574.651	594.303	290.498	243.882	237.547	270.698	401.042	279.789	352.873	386.759	356.345
AGA	ENSG00000038002	101.005	92.2798	92.5142	38.3458	51.185	54.4621	62.1123	60.6454	70.1488	66.2855	64.7822	70.1467
PI4K2B	ENSG00000038210	434.127	469.788	363.018	169.651	214.776	173.815	296.656	272.905	303.978	296.335	303.606	276.846
BOD1L1	ENSG00000038219	1989.99	1830.91	1897.55	1624.47	1552.61	1950.21	1415.6	1835.99	1521.5	1616.2	1665.97	1701.29
MAT2B	ENSG00000038274	570.095	591.43	473.632	374.162	364.317	342.995	532.126	401.042	562.803	481.544	431.236	456.421
TLL1	ENSG00000038295	32.0497	24.1186	38.2124	8.13395	5.01814	9.27014	6.48934	2.93446	5.64416	15.5966	9.66898	16.8352
EDC4	ENSG00000038358	1146.02	1193.35	1200.67	1096.92	939.396	1009.29	838.979	745.352	750.673	984.534	913.718	934.354
TRIO	ENSG00000038382	5193.01	4799.6	4735.32	6086.52	5993.67	6735.92	4516.58	3649.49	3929.14	5022.1	4602.43	4799.9
VCAN	ENSG00000038427	10311.2	9486.99	9166.95	6344.48	7346.56	8304.89	7282.9	7383.09	6523.03	7776.84	7708.11	7598.29
CLEC16A	ENSG00000038532	537.074	538.998	576.203	755.295	776.808	805.344	726.806	757.09	657.141	645.308	664.259	649.091
MSR1	ENSG00000038945	4.85601	3.1459	3.01677	0	2.00726	1.15877	1.8541	6.84707	4.83785	1.94957	3.86759	2.80587
CDH1	ENSG00000039068	4.85601	3.1459	6.03353	85.9875	94.341	85.7488	90.8508	66.5144	74.9866	57.5124	53.1794	54.2468
MTREX	ENSG00000039123	2200.74	2321.68	1919.67	1415.31	1546.59	1555.07	1804.96	1971.96	1831.93	1764.36	1860.31	1721.87
DNAH5	ENSG00000039139	22.3376	22.0213	10.0559	5.80996	8.02902	5.79384	12.9787	11.7378	6.45046	13.647	13.5366	7.48231
ZFYVE16	ENSG00000039319	760.451	806.399	618.437	622.828	804.91	901.521	1118.95	965.436	975.633	820.77	824.764	811.831
RIPOR1	ENSG00000039523	1285.87	1292.97	1425.93	931.918	858.102	823.884	645.226	895.009	674.073	917.274	967.865	924.066
C6	ENSG00000039537	1.9424	0	0	170.813	169.613	176.133	183.556	202.478	233.023	113.075	120.862	137.488
RAI14	ENSG00000039560	5737.86	5824.11	5562.92	1364.18	1365.94	1440.35	1527.78	1711.77	1511.83	2836.63	2792.4	2696.44
SOX30	ENSG00000039600	3.88481	2.09727	6.03353	3.48598	6.02177	4.63507	2.78115	5.86891	4.03154	2.92436	4.83449	4.67645
PNKP	ENSG00000039650	411.789	362.827	375.085	336.978	296.07	271.152	218.784	192.696	203.996	309.007	269.765	268.428
BEST2	ENSG00000039987	0.971202	2.09727	1.00559	2.32399	5.01814	1.15877	0	0	2.41892	0.974786	1.9338	1.87058
PHLPP2	ENSG00000040199	657.503	587.235	533.968	497.333	564.039	604.877	642.445	550.7	546.677	583.897	543.397	539.662
SPDL1	ENSG00000040275	2016.21	2097.27	1925.7	247.505	337.219	322.137	422.734	413.758	371.708	891.929	889.546	827.731
STAU2	ENSG00000040341	611.857	614.499	630.504	686.738	748.706	706.848	949.298	1094.55	982.889	729.14	789.956	766.002
SLC66A1	ENSG00000040487	279.706	266.353	325.811	284.688	226.82	214.372	129.787	146.723	123.365	218.352	203.049	206.699
CTNS	ENSG00000040531	194.24	189.803	222.235	267.258	247.896	301.28	158.525	176.067	171.744	194.957	196.28	216.052
RTN4R	ENSG00000040608	45.6465	55.5776	66.3689	33.6978	39.1415	28.9692	27.8115	30.3227	30.6397	34.1175	39.6428	40.2174
PHF23	ENSG00000040633	837.176	910.214	998.55	813.395	754.728	704.531	708.265	802.085	778.893	755.459	786.088	800.608
CDH10	ENSG00000040731	32.0497	34.6049	46.2571	32.5358	44.1596	41.7156	49.1336	59.6673	44.3469	37.0419	44.4773	43.0233
INPP4A	ENSG00000040933	505.025	505.442	506.817	418.317	508.839	458.872	519.147	389.305	449.114	467.897	446.707	454.551
RAB27B	ENSG00000041353	55.3585	35.6536	30.1677	10.4579	13.0472	19.6991	51.9147	27.3883	27.4145	39.9662	24.1724	25.2528
PSMA4	ENSG00000041357	2241.53	2592.22	2328.94	1381.61	1421.14	1263.06	1632.53	1809.58	1670.67	1708.8	1849.68	1707.84
MYO16	ENSG00000041515	51.4737	52.4317	32.1789	268.42	254.921	260.723	347.643	400.064	312.041	214.453	230.122	201.087
LSG1	ENSG00000041802	1174.18	1199.64	1135.31	680.928	615.224	658.18	604.436	587.87	603.925	795.425	759.982	762.261
PARP3	ENSG00000041880	74.7825	88.0853	93.5198	81.3395	71.2576	69.5261	67.6746	68.4707	54.8289	71.1594	72.5173	69.2114
TNC	ENSG00000041982	8612.62	8120.62	8856.22	1602.39	1821.58	1801.88	1650.15	1520.05	1577.94	3907.92	3581.39	3840.3
THAP3	ENSG00000041988	725.488	692.098	738.102	599.588	476.723	449.602	467.233	447.016	519.262	574.149	513.423	550.885
RIPOR3	ENSG00000042062	20.3952	14.6809	23.1285	196.377	163.591	165.704	126.079	87.0556	120.946	106.252	86.0539	98.2054
TDP1	ENSG00000042088	703.15	690.001	747.153	247.505	234.849	209.737	308.707	312.031	307.203	412.335	390.627	406.851
AIFM2	ENSG00000042286	267.08	282.083	267.487	171.975	126.457	150.64	127.933	113.466	112.883	182.285	164.373	167.417
C2orf83	ENSG00000042304	0	0	0	0	0	0	0	0	0	0	0	0
SPATA7	ENSG00000042317	121.4	131.079	121.676	223.103	253.918	224.801	297.583	345.288	322.523	207.629	235.923	222.599
MED17	ENSG00000042429	718.689	714.12	647.599	468.283	485.756	492.476	543.251	498.858	528.132	561.477	539.529	537.791
RETSAT	ENSG00000042445	309.813	298.861	352.962	492.685	423.531	436.855	309.634	250.407	293.496	349.948	310.374	340.445
CAPG	ENSG00000042493	830.377	781.232	953.298	248.666	234.849	230.595	170.577	172.155	186.257	407.461	372.256	429.298
AP2S1	ENSG00000042753	2089.05	2316.43	2323.92	977.236	740.677	741.611	709.192	610.367	779.7	1220.43	1150.61	1221.49
USH2A	ENSG00000042781	0	3.1459	1.00559	2.32399	5.01814	3.4763	2.78115	2.93446	3.22523	1.94957	3.86759	2.80587
ZPBP	ENSG00000042813	0	1.04863	0	0	0	0	0.927049	0	0	0	0	0
TG	ENSG00000042832	48.5601	31.459	38.2124	29.0498	14.0508	20.8578	19.468	7.82522	17.7388	31.1932	16.4373	24.3175
ADAM28	ENSG00000042980	0.971202	1.04863	4.02236	13.9439	23.0834	19.6991	56.55	60.6454	47.5722	24.3697	28.04	25.2528
BARX2	ENSG00000043039	47.5889	32.5077	44.2459	84.8255	72.2612	77.6374	30.5926	43.0387	40.3154	50.6889	47.378	50.5056
DCUN1D1	ENSG00000043093	519.593	484.469	419.331	216.131	315.139	326.773	534.907	503.748	552.321	422.082	415.766	431.168
JADE2	ENSG00000043143	269.994	261.11	283.576	174.299	143.519	188.879	115.881	152.592	148.361	179.361	176.942	196.411
ZIC2	ENSG00000043355	695.38	698.39	774.304	1080.65	1055.82	951.348	805.605	912.616	879.682	816.871	854.738	836.149
LCP2	ENSG00000043462	11.6544	5.24317	7.03912	13.9439	11.0399	15.064	19.468	18.5849	11.2883	14.6218	11.6028	10.2882
TRIT1	ENSG00000043514	383.625	397.432	394.191	288.174	267.969	239.865	333.738	262.145	303.978	325.579	294.904	303.969
ADRB1	ENSG00000043591	0	3.1459	0	0	0	1.15877	1.8541	1.9563	0.806308	0.974786	1.9338	0.935289
GUCA2B	ENSG00000044012	0	0	0	0	0	0	0	0	0	0	0	0
CUL7	ENSG00000044090	671.1	699.439	765.253	1877.78	1564.66	1755.53	1239.46	1151.29	1282.03	1184.37	1096.46	1205.59
CTNNA1	ENSG00000044115	7179.12	7714.8	7699.8	6825.55	6190.38	6252.71	6079.59	5984.34	6194.06	6441.39	6331.25	6464.72
PHKA2	ENSG00000044446	320.497	336.611	331.844	615.856	539.952	602.559	487.628	410.824	470.884	450.351	411.898	447.068
CNTLN	ENSG00000044459	334.093	380.654	346.928	218.455	269.976	247.976	278.115	426.474	279.789	270.016	344.216	282.457
EPHA3	ENSG00000044524	658.475	663.785	602.348	960.968	1160.19	1181.94	1227.41	1023.15	1136.89	919.223	913.718	944.642
HSPA5	ENSG00000044574	17953.6	19243.5	19638.1	11454.9	11045.9	11101	7837.27	7979.77	8266.27	11956.7	12091.1	12271
DSG2	ENSG00000046604	828.435	816.886	756.203	123.171	137.497	133.258	114.954	109.553	114.496	351.898	331.646	314.257
GEMIN8	ENSG00000046647	81.5809	90.1825	69.3856	130.143	149.541	146.005	109.392	105.64	143.523	102.353	110.226	115.976
OFD1	ENSG00000046651	321.468	337.66	310.727	343.95	360.302	398.616	392.142	470.491	418.474	341.175	374.189	365.698
GPM6B	ENSG00000046653	1317.92	1300.31	1155.42	1460.63	1788.46	1579.4	2537.33	2369.09	2532.61	1739.02	1754.92	1762.09
MAGEC2	ENSG00000046774	0	0	0	0	0	0	0	0	0	0	0	0
PREX2	ENSG00000046889	98.0914	76.5503	100.559	132.467	205.744	195.832	298.51	281.708	233.829	174.487	182.744	173.964
WDR37	ENSG00000047056	472.975	505.442	459.554	447.367	406.469	429.903	438.494	331.594	366.87	436.704	395.461	400.304
YTHDC2	ENSG00000047188	596.318	622.889	537.99	458.987	493.785	564.32	630.393	548.743	545.064	548.805	530.827	529.374
CTPS2	ENSG00000047230	425.386	475.031	471.621	445.043	401.451	451.919	482.992	520.377	500.717	435.729	446.707	461.098
ATP6V1H	ENSG00000047249	536.103	640.715	516.873	418.317	395.429	384.711	342.081	268.014	354.775	416.234	411.898	401.239
POLR2B	ENSG00000047315	3475.93	3985.86	3428.05	2564.52	2492.01	2609.55	2962.85	2849.36	2974.47	2918.51	2964.51	2915.3
FAM214A	ENSG00000047346	145.68	153.101	112.626	269.582	347.255	347.63	407.901	355.069	335.424	267.091	275.566	258.14
ARAP2	ENSG00000047365	42.7329	41.9454	26.1453	8.13395	14.0508	10.4289	25.9574	17.6067	22.5766	25.3444	23.2055	19.6411
TPR	ENSG00000047410	3920.74	3765.64	3824.26	3218.72	3140.35	3727.76	3167.73	4060.31	3153.47	3322.07	3504.04	3408.19
CP	ENSG00000047457	56.3297	59.7721	57.3186	33.6978	47.1705	63.7322	90.8508	55.7547	76.5993	60.4367	52.2125	64.535
KATNIP	ENSG00000047578	342.834	340.806	372.068	421.803	426.542	466.983	418.099	357.026	401.541	379.192	359.686	396.563
DTNBP1	ENSG00000047579	140.824	138.42	174.973	137.115	114.414	106.607	110.319	158.461	113.689	123.798	131.498	127.199
XK	ENSG00000047597	7.76961	4.19454	6.03353	30.2118	30.1088	31.2867	37.082	30.3227	33.0586	24.3697	21.2718	23.3822
ANO2	ENSG00000047617	9.71202	8.38907	9.0503	44.1557	38.1379	38.2393	39.8631	30.3227	32.2523	29.2436	25.1393	25.2528
C12orf4	ENSG00000047621	797.356	890.29	777.32	303.28	398.44	391.664	434.786	433.322	449.114	503.964	544.363	520.021
SCML1	ENSG00000047634	289.418	291.52	280.559	212.645	263.954	237.547	366.184	317.9	320.104	284.638	279.433	274.975
WWC3	ENSG00000047644	592.433	594.575	560.113	586.806	552.999	545.78	449.619	505.705	464.433	519.561	526.959	500.38
ARHGAP6	ENSG00000047648	59.2433	45.0913	47.2627	307.928	314.136	345.313	406.047	451.906	403.154	248.57	263.963	263.752
FAM184B	ENSG00000047662	177.73	149.955	177.989	383.458	420.52	460.031	365.257	323.768	356.388	294.385	288.136	317.063
MAP4	ENSG00000047849	8833.08	9325.5	9548.07	8905.51	8096.27	8892.38	7225.42	8022.81	7014.07	7977.65	8109.37	8065
GOPC	ENSG00000047932	855.629	782.281	659.666	847.093	987.57	986.111	1209.8	1126.83	1108.67	947.492	929.189	898.813
ROS1	ENSG00000047936	0.971202	2.09727	3.01677	0	0	6.95261	1.8541	6.84707	3.22523	0.974786	2.90069	3.74116
USP28	ENSG00000048028	604.087	613.451	617.432	670.47	684.474	736.976	817.657	697.423	783.731	676.502	638.153	693.049
HDAC9	ENSG00000048052	469.09	480.274	371.062	169.651	285.03	260.723	372.674	338.441	332.199	335.326	350.984	313.322
TSPAN17	ENSG00000048140	709.948	722.509	760.225	555.433	507.836	482.047	412.537	353.113	401.541	537.107	501.82	520.956
NOP16	ENSG00000048162	1023.65	1173.42	1111.18	837.797	789.855	685.991	800.97	743.396	803.083	857.812	859.572	839.89
CC2D2A	ENSG00000048342	337.978	349.195	343.911	422.965	434.571	457.713	465.379	504.727	448.307	394.788	412.865	403.11
RRM2B	ENSG00000048392	443.839	489.712	383.129	371.838	503.821	425.268	624.831	476.36	570.06	471.796	468.945	453.615
ZNF800	ENSG00000048405	405.962	422.599	305.699	249.828	310.121	303.597	393.069	409.846	316.073	343.125	364.52	298.357
TNFRSF17	ENSG00000048462	2.9136	0	0	1.16199	1.00363	2.31754	3.7082	1.9563	1.61262	2.92436	0.966898	0.935289
SNX29	ENSG00000048471	344.777	299.909	315.755	326.52	341.233	367.329	353.206	328.659	336.23	330.452	310.374	326.416
LMO3	ENSG00000048540	35.9345	33.5563	25.1397	34.8598	47.1705	49.827	119.589	108.575	103.207	63.3611	60.9146	60.7938
MRPS10	ENSG00000048544	821.636	856.734	794.415	395.078	408.477	392.822	478.357	523.312	539.42	552.704	566.602	560.238
GUCA1A	ENSG00000048545	1.9424	3.1459	2.01118	1.16199	0	4.63507	0.927049	0.978152	1.61262	0.974786	0.966898	2.80587
RSF1	ENSG00000048649	1287.81	1284.58	1274.08	1079.49	1236.47	1316.36	1515.72	1695.14	1523.92	1264.3	1350.76	1338.4
VPS13D	ENSG00000048707	917.785	915.457	860.784	905.193	984.559	1082.29	1039.22	859.796	875.65	924.097	880.844	896.942
CELF2	ENSG00000048740	1629.68	1634.82	1492.29	1818.52	2144.75	1969.91	2601.3	2586.23	2364.09	1965.17	2043.06	1907.05
FAM120A	ENSG00000048828	2607.68	2518.82	2501.91	1387.42	1530.53	1528.41	1596.38	1643.3	1594.07	1819.93	1807.13	1803.24
R3HDM1	ENSG00000048991	1180.01	1173.42	1161.46	943.538	1048.79	1034.78	1095.77	1482.88	1074.81	1043.02	1186.38	1054.07
COL9A2	ENSG00000049089	63.1281	81.7934	75.4192	91.7974	81.2939	76.4787	58.4041	79.2303	58.0542	67.2602	77.3518	66.4055
KITLG	ENSG00000049130	930.411	890.29	617.432	255.638	378.368	353.424	682.308	476.36	573.285	621.914	552.099	507.862
ERCC8	ENSG00000049167	284.562	315.639	242.347	167.327	179.649	169.18	223.419	214.215	249.149	220.302	225.287	216.987
ADAMTS6	ENSG00000049192	323.41	343.952	284.582	38.3458	32.1161	30.128	19.468	18.5849	21.7703	125.747	121.829	104.752
H6PD	ENSG00000049239	563.297	575.7	617.432	2039.3	1893.85	2001.19	1508.31	1201.17	1431.2	1287.69	1180.58	1283.22
VAMP3	ENSG00000049245	1599.57	1672.57	1442.01	929.594	1025.71	954.825	1221.85	1169.87	1261.07	1223.36	1228.93	1191.56
PER3	ENSG00000049246	86.4369	90.1825	102.57	46.4797	48.1741	49.827	63.9664	52.8202	45.1532	64.3359	60.9146	62.6644
UTS2	ENSG00000049247	17.4816	16.7781	14.0782	6.97196	5.01814	4.63507	11.1246	4.89076	11.2883	11.6974	8.70208	10.2882
TNFRSF9	ENSG00000049249	2.9136	4.19454	0	3.48598	1.00363	1.15877	0	0	0	1.94957	1.9338	0
EPN3	ENSG00000049283	1.9424	2.09727	1.00559	3.48598	9.03265	3.4763	1.8541	0.978152	1.61262	1.94957	3.86759	1.87058
LTBP1	ENSG00000049323	6720.71	6824.51	7038.12	1381.61	1371.96	1380.09	1162.52	1102.38	1167.53	3042.31	2901.66	3005.08
RCN1	ENSG00000049449	3313.74	3459.44	3476.32	3809.01	3981.39	3852.9	3730.44	4621.77	4075.08	3480.96	3864.69	3689.72
ELN	ENSG00000049540	2668.86	2612.15	3285.26	937.728	915.309	838.948	487.628	537.984	556.352	1325.71	1274.37	1459.05
RFC2	ENSG00000049541	1195.55	1429.29	1390.73	349.76	338.223	288.533	319.832	412.78	362.032	610.216	683.597	649.091
ARID1B	ENSG00000049618	1505.36	1385.25	1536.54	1509.43	1603.8	1593.31	1611.21	1661.88	1565.04	1490.45	1488.06	1510.49
CLPTM1L	ENSG00000049656	1734.57	1861.33	1894.53	1560.56	1436.19	1392.84	1071.67	964.458	1107.06	1391.99	1350.76	1389.84
NEDD4L	ENSG00000049759	824.55	837.859	750.169	1013.26	1198.33	1283.91	1385.01	1280.4	1344.12	1044.97	1064.55	1098.03
FOXP3	ENSG00000049768	20.3952	10.4863	13.0727	4.64797	10.0363	12.7464	11.1246	5.86891	13.7072	11.6974	8.70208	13.0941
PPP1R3F	ENSG00000049769	54.3873	52.4317	46.2571	191.729	144.522	155.275	137.203	127.16	164.487	119.899	104.425	119.717
HEXB	ENSG00000049860	1526.73	1739.68	1400.79	635.61	676.445	717.277	571.989	540.918	667.623	889.005	930.156	885.719
PTCD2	ENSG00000049883	185.499	210.775	183.017	94.1214	120.435	100.813	138.13	163.351	158.843	136.47	157.604	144.97
NEXMIF	ENSG00000050030	151.507	140.517	145.81	59.2616	81.2939	86.9076	125.152	118.356	105.626	111.126	108.293	109.429
JKAMP	ENSG00000050130	553.585	624.986	547.04	522.897	596.155	545.78	543.251	487.12	547.483	521.511	544.363	528.438
DKK3	ENSG00000050165	791.529	861.977	838.661	1172.45	1156.18	1127.48	1042	1118.03	1130.44	958.215	1004.61	1000.76
ARHGEF5	ENSG00000050327	6.79841	18.8754	15.0838	12.7819	10.0363	10.4289	8.34344	14.6723	15.3199	8.77307	13.5366	13.0941
NFE2L3	ENSG00000050344	195.212	211.824	178.995	106.903	102.37	115.877	113.1	90.9682	117.721	134.52	127.631	131.876
MCUR1	ENSG00000050393	710.92	823.178	779.332	376.486	386.397	340.678	456.108	608.411	497.492	502.99	577.238	525.633
LIMA1	ENSG00000050405	2699.94	2770.49	2708.05	1727.88	1845.67	1797.25	1867.08	1983.69	1945.62	2041.2	2098.17	2075.41
LETMD1	ENSG00000050426	422.473	391.14	399.219	970.264	907.28	901.521	778.721	685.685	832.916	685.275	637.186	688.373
SLC4A8	ENSG00000050438	279.706	310.396	293.632	415.993	426.542	457.713	411.61	359.96	333.811	353.847	350.984	343.251
LAMC3	ENSG00000050555	93.2353	81.7934	92.5142	341.626	359.299	348.789	235.47	260.189	241.086	209.579	226.254	216.052
PTGER3	ENSG00000050628	16.5104	12.5836	13.0727	2.32399	3.01088	2.31754	9.27049	6.84707	10.482	9.74786	6.76829	8.4176
TNIP3	ENSG00000050730	4.85601	3.1459	0	0	0	0	0.927049	4.89076	3.22523	1.94957	2.90069	0.935289
MAPK9	ENSG00000050748	816.78	879.804	795.421	477.579	502.818	475.095	571.062	548.743	567.641	607.292	613.013	593.909
COL23A1	ENSG00000050767	186.471	197.143	235.308	376.486	362.31	346.472	244.741	245.516	239.473	253.444	258.162	259.075
BCAR1	ENSG00000050820	2123.05	1980.87	2234.42	935.404	791.862	776.374	628.539	665.144	647.465	1192.16	1081.96	1152.28
FAM160A2	ENSG00000051009	255.426	226.505	267.487	393.916	473.712	433.379	284.604	223.019	274.951	295.36	294.904	305.84
HERPUD1	ENSG00000051108	1141.16	1247.87	1306.26	944.7	1047.79	882.981	711.046	811.866	740.997	894.854	987.203	928.742
HOMER3	ENSG00000051128	363.229	370.168	394.191	395.078	350.266	373.123	304.999	376.589	366.064	339.226	350.017	363.828
RAD51	ENSG00000051180	654.59	716.217	705.924	131.305	108.392	122.829	156.671	146.723	155.617	310.957	303.606	312.387
POLQ	ENSG00000051341	773.076	742.433	700.896	153.383	181.657	216.69	266.063	255.298	209.64	394.788	370.322	356.345
PIK3CB	ENSG00000051382	286.504	355.487	278.548	178.947	160.58	157.592	238.252	189.762	197.545	229.075	223.353	204.828
CYBA	ENSG00000051523	295.245	289.423	358.995	216.131	159.577	174.974	77.8721	61.6236	111.27	186.184	160.505	201.087
THOC3	ENSG00000051596	86.4369	116.398	112.626	47.6417	39.1415	38.2393	45.4254	32.279	55.6352	58.4872	58.9808	66.4055
HEBP2	ENSG00000051620	642.935	730.898	716.985	414.831	459.662	419.474	506.169	604.498	566.834	508.838	571.437	554.627
MPHOSPH9	ENSG00000051825	741.998	767.6	655.644	433.423	544.97	475.095	596.092	577.11	482.978	578.048	601.41	518.15
PLEKHA5	ENSG00000052126	414.703	414.21	376.09	319.548	339.226	397.457	461.67	493.967	466.852	389.914	399.329	404.045
PRSS8	ENSG00000052344	0	3.1459	1.00559	1.16199	0	1.15877	0	0	1.61262	0	0.966898	0.935289
SIKE1	ENSG00000052723	751.71	747.676	595.309	531.031	657.376	694.102	1075.38	950.764	944.187	776.904	754.18	736.073
RRP12	ENSG00000052749	1334.43	1366.37	1340.45	890.087	747.703	848.218	513.585	554.612	531.357	875.358	843.135	849.243
FNIP2	ENSG00000052795	621.569	581.992	558.102	392.754	466.687	428.744	571.989	498.858	508.78	518.586	493.118	485.415
MSMO1	ENSG00000052802	1484.97	1556.17	1195.65	1313.05	1711.19	1550.43	2090.5	1862.4	2185.9	1596.7	1641.79	1633.02
TTC17	ENSG00000052841	851.744	868.269	920.114	1710.45	1828.61	1885.32	1555.59	1695.14	1500.54	1308.16	1412.64	1373
ALX4	ENSG00000052850	18.4528	20.9727	14.0782	118.523	133.483	117.036	118.662	107.597	112.077	80.9072	85.087	79.4996
FSTL4	ENSG00000053108	42.7329	37.7508	30.1677	56.9377	48.1741	52.1446	19.468	23.4757	23.3829	37.0419	34.8083	32.7351
FOXN3	ENSG00000053254	1648.13	1604.41	1626.04	1386.26	1465.3	1557.38	1960.71	1835.01	1802.9	1625.94	1568.31	1619.92
METTL24	ENSG00000053328	1.9424	2.09727	0	5.80996	7.0254	4.63507	7.41639	4.89076	2.41892	4.87393	4.83449	1.87058
AKR7A2	ENSG00000053371	455.494	455.107	485.7	486.875	439.589	417.156	407.901	383.436	416.055	431.83	407.064	423.686
MRTO4	ENSG00000053372	2169.66	2441.22	2290.73	703.006	638.307	588.654	649.861	633.843	765.186	1150.25	1164.15	1164.44
NNAT	ENSG00000053438	22.3376	23.0699	28.1565	175.461	206.747	236.389	195.607	249.429	182.226	124.773	155.671	143.099
USE1	ENSG00000053501	191.327	191.9	219.218	216.131	154.559	166.863	151.109	159.439	150.78	177.411	161.472	171.158
MCF2L2	ENSG00000053524	222.405	231.748	184.023	84.8255	108.392	90.3839	125.152	110.531	127.397	142.319	142.134	130.941
NRIP2	ENSG00000053702	13.5968	30.4104	28.1565	46.4797	55.1995	78.7962	60.2582	41.0824	48.3785	38.9914	40.6097	48.635
LAMA3	ENSG00000053747	23.3088	24.1186	27.1509	84.8255	86.312	93.8602	43.5713	66.5144	58.0542	46.7897	57.047	56.1174
AP5M1	ENSG00000053770	574.951	601.916	480.672	356.732	444.607	440.332	629.466	546.787	606.344	512.737	507.621	502.25
ANAPC4	ENSG00000053900	391.394	455.107	357.99	389.268	404.462	432.22	395.85	327.681	366.064	378.217	378.057	368.504
KCNQ1	ENSG00000053918	6.79841	4.19454	4.02236	33.6978	29.1052	27.8104	41.7172	35.2135	45.9596	26.3192	22.2387	26.1881
TRAPPC3	ENSG00000054116	725.488	748.725	821.566	513.601	537.945	454.237	498.752	614.28	501.524	561.477	605.278	570.526
THRAP3	ENSG00000054118	4716.15	4992.55	5044.03	2899.17	2760.98	2866.79	2946.16	3575.15	2930.12	3421.5	3598.79	3468.05
PHPT1	ENSG00000054148	599.231	655.396	736.091	1121.32	898.247	891.092	753.691	742.418	804.695	777.879	734.842	779.096
ENTPD2	ENSG00000054179	1.9424	1.04863	2.01118	90.6355	78.283	86.9076	101.048	109.553	111.27	61.4115	61.8815	67.3408
LY75	ENSG00000054219	1.9424	2.09727	2.01118	23.2399	15.0544	15.064	18.541	22.4975	13.7072	13.647	12.5697	10.2882
ARID4B	ENSG00000054267	1487.88	1664.18	1508.38	1277.03	1403.07	1409.06	1605.65	1997.39	1656.16	1417.34	1620.52	1487.11
OPN3	ENSG00000054277	322.439	393.238	346.928	958.644	961.476	850.536	862.155	788.391	940.155	678.451	689.398	699.596
SDCCAG8	ENSG00000054282	271.936	319.833	273.52	270.744	264.958	268.834	294.802	363.873	310.429	270.016	303.606	276.846
PTPRN	ENSG00000054356	134.026	136.322	122.682	41.8317	47.1705	37.0806	25.0303	20.5412	26.6082	65.3107	63.8153	57.9879
HHAT	ENSG00000054392	204.924	178.268	207.151	152.221	142.515	158.751	152.963	136.941	158.036	164.739	146.002	168.352
KIF1B	ENSG00000054523	3730.39	3629.32	3462.24	6043.53	6903.96	7329.21	8183.99	7182.57	7314.02	5806.8	5698.9	5873.62
FOXC1	ENSG00000054598	418.588	368.071	488.716	288.174	332.201	290.851	212.294	262.145	216.091	295.36	306.507	313.322
TBC1D22A	ENSG00000054611	323.41	354.438	362.012	291.66	326.179	331.408	317.051	299.315	309.622	301.209	312.308	320.804
SYNE2	ENSG00000054654	1458.74	1209.07	1171.51	1030.69	1108.01	1325.63	1439.71	1268.66	1122.38	1280.87	1145.77	1154.15
PLEKHH1	ENSG00000054690	64.0993	52.4317	61.3409	113.875	130.472	110.083	109.392	93.9026	103.207	91.6299	88.9546	88.8525
ATP9A	ENSG00000054793	1181.95	1156.64	1036.76	2749.28	2932.6	3110.13	2695.86	2430.71	2567.28	2109.44	2098.17	2151.17
SPO11	ENSG00000054796	0	0	0	0	0	0	0	0	0	0	0	0
CBLN4	ENSG00000054803	0	0	0	1.16199	0	1.15877	1.8541	0	0.806308	0.974786	0	0.935289
CHRDL2	ENSG00000054938	0.971202	5.24317	2.01118	4.64797	1.00363	1.15877	1.8541	0	0	1.94957	1.9338	0.935289
FAM168A	ENSG00000054965	1411.16	1399.93	1439	1423.44	1476.34	1491.33	1496.26	1462.34	1412.65	1394.92	1386.53	1393.58
RELT	ENSG00000054967	134.997	146.809	142.794	92.9594	68.2467	66.0498	55.6229	38.1479	47.5722	90.6551	79.2856	80.4349
GALC	ENSG00000054983	419.559	454.058	440.448	707.654	734.656	701.055	642.445	660.253	622.47	563.426	592.708	565.85
NOP58	ENSG00000055044	2867.96	3041.04	2895.09	1058.58	1149.15	1156.45	1269.13	1621.78	1319.12	1700.03	1838.07	1719.06
SZRD1	ENSG00000055070	3105.9	3206.72	3553.75	1895.21	1732.26	1739.31	1879.13	1974.89	1937.56	2227.39	2192.92	2318.58
KCNH2	ENSG00000055118	192.298	177.219	224.246	1052.77	1002.62	931.649	735.15	776.653	753.898	616.065	632.351	611.679
CUL1	ENSG00000055130	1675.32	2011.28	1811.07	1264.25	1242.49	1278.12	1288.6	1536.68	1433.62	1365.68	1523.83	1459.99
FAM114A2	ENSG00000055147	485.601	483.42	461.565	350.922	383.386	338.36	445.91	474.404	476.528	417.208	428.336	418.074
CYFIP2	ENSG00000055163	867.283	901.825	877.879	696.034	680.46	657.021	517.293	600.586	524.1	665.779	693.266	651.897
TAB2	ENSG00000055208	1494.68	1570.85	1448.05	1119	1149.15	1089.24	1423.95	1912.29	1449.74	1312.06	1482.25	1302.86
GINM1	ENSG00000055211	735.2	759.211	690.84	477.579	485.756	463.507	524.71	604.498	549.096	563.426	588.841	550.885
EIF2AK2	ENSG00000055332	1806.43	1699.84	1505.37	909.84	1285.65	1148.34	1501.82	1695.14	1411.85	1385.17	1493.86	1321.56
USP36	ENSG00000055483	1046.96	1084.29	1086.04	845.931	771.79	811.138	644.299	687.641	641.015	812.972	807.36	802.478
KMT2C	ENSG00000055609	1352.88	1184.96	1278.1	1555.91	1859.72	2234.1	2228.63	2104.98	1756.94	1668.83	1655.33	1676.97
MCOLN3	ENSG00000055732	14.568	14.6809	14.0782	55.7757	66.2394	82.2725	49.1336	49.8858	25.8019	38.0167	42.5435	36.4763
CCDC85A	ENSG00000055813	36.9057	31.459	49.2739	22.0779	23.0834	18.5403	30.5926	27.3883	32.2523	29.2436	26.1062	32.7351
PUM2	ENSG00000055917	1535.47	1622.24	1408.83	1306.08	1368.95	1483.22	1871.71	1692.2	1856.12	1535.29	1495.79	1553.52
MRPL43	ENSG00000055950	530.276	612.402	635.532	508.953	448.622	470.46	419.026	466.579	520.875	466.923	486.35	524.697
ITIH4	ENSG00000055955	25.2512	32.5077	28.1565	1132.94	907.28	1061.43	549.74	486.142	502.33	517.611	461.21	488.221
ITIH1	ENSG00000055957	0	0	0	0	0	0	0.927049	0	0	0	0	0
HPF1	ENSG00000056050	421.501	492.858	417.319	261.448	250.907	239.865	349.497	440.169	395.091	336.301	377.09	346.992
ZFR	ENSG00000056097	2733.93	2661.43	2452.63	1734.86	2046.4	1996.56	2674.54	3414.73	2633.4	2337.54	2599.99	2315.78
ZNF280C	ENSG00000056277	182.586	152.052	169.945	146.411	169.613	188.879	228.054	217.15	227.379	182.285	173.075	191.734
NPFFR2	ENSG00000056291	1.9424	3.1459	2.01118	0	0	0	0	0	1.61262	0.974786	0.966898	0.935289
PHF21B	ENSG00000056487	177.73	183.511	198.101	314.9	311.125	323.296	224.346	279.752	237.055	226.15	248.493	240.369
TRAF1	ENSG00000056558	25.2512	30.4104	39.218	128.981	142.515	135.576	105.684	85.0993	98.3696	81.882	83.1532	86.9819
RC3H2	ENSG00000056586	1344.14	1274.09	1097.1	1634.92	1860.73	1896.9	2648.58	2132.37	2289.91	1835.52	1692.07	1735.9
KIFC1	ENSG00000056678	0	0	0	0	0	0	0	0	0	0	0	0
IL17RB	ENSG00000056736	48.5601	58.7235	53.2962	49.9657	70.254	68.3673	86.2155	61.6236	69.3425	60.4367	60.9146	61.7291
TRAF3IP2	ENSG00000056972	110.717	115.35	129.721	168.489	140.508	168.021	145.547	178.024	159.649	135.495	139.233	146.84
GYG2	ENSG00000056998	199.096	257.964	293.632	665.822	620.242	673.244	663.767	575.154	674.88	485.443	467.979	533.115
DCBLD2	ENSG00000057019	6721.69	6430.22	5357.78	1517.56	1723.23	1783.34	2019.11	1620.8	1856.12	3380.56	3064.1	2858.24
SERPINB3	ENSG00000057149	0.971202	1.04863	0	0	0	0	0	0	0	0	0	0
SOAT1	ENSG00000057252	1420.87	1355.88	1138.33	438.071	523.894	558.526	553.448	405.933	507.974	791.526	718.405	699.596
PKP2	ENSG00000057294	122.371	121.642	106.592	558.919	554.003	584.019	662.84	737.527	673.267	429.881	458.31	450.809
MSH4	ENSG00000057468	2.9136	0	1.00559	6.97196	5.01814	6.95261	8.34344	3.91261	5.64416	5.84872	2.90069	4.67645
F7	ENSG00000057593	3.88481	2.09727	0	3.48598	5.01814	4.63507	7.41639	3.91261	2.41892	4.87393	3.86759	1.87058
GDI2	ENSG00000057608	7161.64	8100.7	7327.73	4549.2	4498.26	4522.67	5162.73	5448.31	5411.13	5477.32	5729.84	5580.87
PRDM1	ENSG00000057657	10.6832	14.6809	16.0894	9.29594	9.03265	8.11138	4.63524	4.89076	4.83785	7.79829	8.70208	9.35289
ATG5	ENSG00000057663	509.881	636.521	494.75	230.075	268.972	251.453	335.592	288.555	333.005	352.873	377.09	349.798
TMCC3	ENSG00000057704	159.277	156.246	157.877	263.772	297.074	267.675	447.765	410.824	445.082	283.663	278.467	292.746
PITHD1	ENSG00000057757	802.212	866.172	877.879	488.037	420.52	429.903	419.953	401.042	420.893	551.729	533.728	550.885
MTA3	ENSG00000057935	469.09	525.366	519.89	685.576	647.34	663.974	707.338	805.998	720.033	596.569	635.252	618.226
USP13	ENSG00000058056	1153.79	1149.3	1032.74	914.488	1022.7	1098.51	1188.48	1076.95	1084.48	1058.62	1036.51	1035.37
ATP11B	ENSG00000058063	1198.46	1204.88	1009.61	785.507	1017.68	1098.51	1283.04	1188.46	1098.19	1070.32	1088.73	1033.49
LAMC2	ENSG00000058085	1112.03	1063.31	1095.09	30.2118	26.0943	30.128	25.9574	23.4757	20.1577	389.914	343.249	355.41
CDK14	ENSG00000058091	1196.52	1303.45	1137.32	707.654	795.877	830.837	1051.27	986.956	986.921	966.988	981.401	957.736
SEC61A1	ENSG00000058262	7431.63	7548.07	7853.65	6575.72	6366.01	5929.42	4460.03	4225.62	4563.7	5888.68	5756.91	5795.05
PPP1R12A	ENSG00000058272	2113.33	2050.08	2023.25	1432.74	1627.88	1607.21	1762.32	2129.44	1706.15	1725.37	1854.51	1719.06
RASGRF1	ENSG00000058335	24.28	34.6049	29.1621	18.5919	11.0399	17.3815	20.3951	22.4975	12.0946	20.4705	21.2718	18.7058
CAMK2B	ENSG00000058404	40.7905	40.8967	29.1621	66.2336	48.1741	28.9692	38.9361	35.2135	46.7659	45.8149	39.6428	34.6057
CROCC	ENSG00000058453	207.837	158.344	227.263	263.772	221.802	217.848	158.525	157.483	152.392	198.856	172.108	187.993
POLR3E	ENSG00000058600	544.844	545.29	559.108	661.174	686.481	659.339	567.354	627.974	603.925	566.351	594.642	584.556
ATP2B4	ENSG00000058668	2854.36	2654.09	2593.41	2663.29	3088.16	3219.06	2866.43	2895.33	2651.14	2704.06	2761.46	2695.5
ZC3H11A	ENSG00000058673	1949.2	1997.65	1881.46	2850.37	3012.89	3188.93	3267.85	2857.18	2994.63	2594.88	2522.64	2599.17
RIOK2	ENSG00000058729	768.22	783.33	691.845	513.601	522.89	517.969	591.457	664.165	619.244	608.267	627.517	592.973
YIPF1	ENSG00000058799	291.36	289.423	331.844	271.906	307.11	260.723	238.252	238.669	262.05	257.344	265.897	274.04
NDC1	ENSG00000058804	1688.92	1664.18	1409.84	455.501	514.861	480.889	707.338	592.76	664.398	940.669	872.142	823.055
DGKG	ENSG00000058866	106.832	108.009	129.721	88.3115	74.2685	71.8436	101.048	115.422	98.3696	95.529	94.756	97.2701
FLYWCH1	ENSG00000059122	457.436	471.885	508.828	412.508	397.437	366.171	300.364	282.686	295.109	373.343	365.487	370.375
UNKL	ENSG00000059145	202.981	218.116	243.353	270.744	239.867	251.453	204.878	141.832	165.293	215.428	190.479	206.699
TBXAS1	ENSG00000059377	51.4737	26.2158	34.19	26.7258	24.0871	35.9218	23.1762	21.5194	16.9325	33.1427	23.2055	27.1234
PARP12	ENSG00000059378	54.3873	59.7721	66.3689	65.0716	85.3084	67.2085	59.3311	33.2572	51.6037	57.5124	57.047	58.9232
ALDH18A1	ENSG00000059573	2428.98	2582.79	2513.97	1780.17	1609.82	1600.26	1462.88	1327.35	1556.17	1822.85	1748.15	1811.66
TARBP1	ENSG00000059588	494.342	472.934	433.409	577.511	671.427	677.879	565.5	392.239	491.042	525.41	490.217	506.927
GATB	ENSG00000059691	385.567	429.94	393.185	409.022	342.237	342.995	357.841	380.501	415.249	368.469	367.421	375.051
MXD1	ENSG00000059728	259.311	243.283	257.431	240.533	228.827	229.436	295.729	313.987	266.082	257.344	251.393	244.111
CDK17	ENSG00000059758	783.76	704.682	649.611	390.43	471.705	477.412	669.329	602.542	571.672	606.317	566.602	550.885
DNAJC25	ENSG00000059769	263.196	255.867	256.425	158.031	197.715	201.626	187.264	216.172	217.703	197.882	213.684	217.922
SLC2A3	ENSG00000059804	1356.77	1458.65	1556.65	490.361	489.77	506.382	574.77	452.885	571.672	792.501	755.147	839.89
PSD	ENSG00000059915	72.8401	51.3831	86.4807	204.511	155.562	186.562	127.006	101.728	137.072	125.747	99.5905	130.005
CTDP1	ENSG00000060069	493.37	511.733	521.901	317.224	267.969	289.692	242.887	241.604	241.086	339.226	322.944	332.963
YBX3	ENSG00000060138	5016.26	5177.11	5423.14	2984	2774.03	2657.05	4180.06	5135.3	4467.75	3978.1	4174.1	4123.69
STYK1	ENSG00000060140	11.6544	10.4863	7.03912	0	0	1.15877	1.8541	3.91261	1.61262	4.87393	4.83449	2.80587
WNK1	ENSG00000060237	4952.16	4691.59	4891.19	2419.27	2694.74	3023.23	2783.93	3324.74	2549.55	3309.4	3402.51	3315.6
RPS17P5	ENSG00000060303	0	1.04863	1.00559	0	0	1.15877	0.927049	0	0	0	0	0.935289
CCAR1	ENSG00000060339	2410.52	2332.16	2274.64	1645.38	1731.26	1816.95	1791.99	2455.16	1885.15	1894.98	2081.73	1922.95
OGFR	ENSG00000060491	547.758	488.663	615.421	589.13	556.01	485.524	436.64	470.491	414.442	501.04	483.449	481.674
GNA15	ENSG00000060558	2.9136	1.04863	2.01118	0	2.00726	0	0	0	0.806308	0.974786	0.966898	0.935289
CREB3L3	ENSG00000060566	0	0	0	0	0	0	0	0	0	0	0	0
PIGV	ENSG00000060642	67.0129	70.2585	94.5254	113.875	114.414	122.829	107.538	93.9026	98.3696	91.6299	88.9546	100.076
PTPRU	ENSG00000060656	487.543	439.378	540.001	677.442	616.228	628.052	488.555	444.081	484.591	523.46	479.581	523.762
SNRNP40	ENSG00000060688	1063.47	1179.71	1184.58	513.601	539.952	470.46	564.573	561.459	541.839	696.972	721.306	703.338
RIMBP2	ENSG00000060709	82.5521	89.1339	67.3745	165.003	177.642	156.434	155.744	152.592	151.586	128.672	134.399	121.588
COL11A1	ENSG00000060718	4558.82	4377	4869.06	11882.5	12327.6	12563.4	8069.03	8708.49	8428.34	7676.44	8173.19	8148.24
QSER1	ENSG00000060749	2259.99	2077.34	1930.73	822.691	1135.1	1205.12	1697.43	1816.43	1583.59	1581.1	1601.18	1534.81
MPC1	ENSG00000060762	297.188	295.715	304.693	569.377	611.209	466.983	734.223	790.347	772.443	515.662	547.264	519.086
ACAA1	ENSG00000060971	345.748	370.168	385.141	488.037	461.669	453.078	393.996	352.135	406.379	389.914	378.057	398.433
BCAT1	ENSG00000060982	6512.88	6262.44	4894.2	1660.49	2178.88	2224.83	3825	3302.24	3663.86	3983.95	3712.89	3532.59
HDAC7	ENSG00000061273	1625.79	1535.2	1669.28	935.404	786.844	865.6	546.959	447.016	582.961	997.206	872.142	975.507
LZTS1	ENSG00000061337	1477.2	1459.7	1581.79	1149.21	1124.06	1052.16	837.125	845.124	831.303	1109.31	1087.76	1095.22
PRDM6	ENSG00000061455	23.3088	22.0213	37.2068	49.9657	47.1705	41.7156	54.6959	52.8202	51.6037	40.941	39.6428	43.0233
WNT8A	ENSG00000061492	0	0	0	0	0	0	0	0	0.806308	0	0	0
SPAG4	ENSG00000061656	8.74081	10.4863	22.123	132.467	173.628	200.467	137.203	87.0556	108.852	87.7307	87.9877	102.882
NCKAP1	ENSG00000061676	4424.79	4538.49	3767.94	1789.47	2118.66	2178.48	2675.46	2416.04	2664.85	2918.51	2871.69	2784.36
MRPS35	ENSG00000061794	964.403	1092.68	922.125	562.405	571.064	486.683	704.557	709.16	702.294	727.19	753.213	688.373
GUCY1B1	ENSG00000061918	97.1202	109.058	105.587	220.779	189.686	228.277	221.565	241.604	199.158	171.562	174.042	171.158
SFSWAP	ENSG00000061936	984.798	960.549	1037.77	1275.87	1230.45	1244.52	956.714	1166.94	912.741	1021.58	1075.19	1009.18
TNK2	ENSG00000061938	272.908	255.867	312.738	799.451	742.685	769.422	448.692	404.955	442.663	471.796	450.574	475.127
MON2	ENSG00000061987	877.966	879.804	761.231	804.099	984.559	1112.42	1239.46	974.24	958.7	953.341	907.917	906.295
CDH3	ENSG00000062038	39.8193	60.8208	66.3689	238.209	218.791	235.23	145.547	134.007	143.523	130.621	133.432	139.358
ARSF	ENSG00000062096	0.971202	1.04863	1.00559	2.32399	0	0	1.8541	0.978152	0	1.94957	0.966898	0
GPBP1	ENSG00000062194	1503.42	1551.98	1356.54	1280.52	1353.89	1385.89	1735.44	1962.17	1760.17	1469	1558.64	1474.02
DGAT2	ENSG00000062282	8.74081	7.34044	9.0503	12.7819	11.0399	10.4289	12.0516	7.82522	8.86939	10.7226	8.70208	9.35289
ZNF112	ENSG00000062370	106.832	99.6202	92.5142	178.947	196.711	207.419	215.075	242.582	207.221	160.84	174.042	164.611
CS	ENSG00000062485	4541.34	4756.6	4761.46	3432.53	3034.97	3039.45	3180.7	3343.32	3242.16	3594.04	3537.88	3547.55
LTK	ENSG00000062524	1.9424	4.19454	3.01677	313.738	244.885	243.341	178.92	96.8371	150.78	151.092	112.16	124.393
MRPS24	ENSG00000062582	544.844	607.159	644.583	556.595	447.618	404.41	438.494	493.967	481.366	491.292	493.118	494.768
ELMO2	ENSG00000062598	784.731	796.962	870.84	1051.6	973.519	884.14	775.013	778.609	727.29	828.568	814.128	789.384
WAPL	ENSG00000062650	1791.87	1830.91	1636.09	874.981	960.472	996.54	1264.49	1211.93	1139.31	1287.69	1270.5	1215.88
VMP1	ENSG00000062716	2261.93	2319.58	2244.47	1071.36	1108.01	1016.24	1017.9	992.825	992.565	1413.44	1396.2	1353.36
APPBP2	ENSG00000062725	915.843	899.728	763.242	992.342	1249.52	1158.77	1590.82	1471.14	1523.12	1141.47	1162.21	1137.31
POLD1	ENSG00000062822	907.102	919.652	962.349	378.81	364.317	360.377	277.188	266.057	288.658	506.889	487.317	506.927
SEZ6	ENSG00000063015	161.219	183.511	213.185	442.719	406.469	342.995	206.732	220.084	195.127	250.52	259.129	233.822
EIF4B	ENSG00000063046	5186.22	5613.34	5428.17	6338.67	6033.81	6173.92	7042.79	8014	7381.75	5976.41	6303.21	6198.16
SLC6A16	ENSG00000063127	14.568	20.9727	24.1341	142.925	136.493	148.322	126.079	93.9026	113.689	88.7055	81.2194	91.6584
BICRA	ENSG00000063169	278.735	235.943	268.492	278.878	272.987	337.201	212.294	285.621	208.834	245.646	254.294	254.399
SPHK2	ENSG00000063176	227.261	186.657	243.353	233.561	235.853	194.673	151.109	160.417	143.523	193.982	185.644	183.317
RPL18	ENSG00000063177	7563.72	8480.3	8961.81	10218.6	8450.55	8215.66	8737.44	10067.1	9798.25	8450.42	8637.3	8777.69
CA11	ENSG00000063180	42.7329	35.6536	41.2292	385.782	357.292	308.232	204.878	298.336	239.473	193.982	224.32	187.993
ISOC2	ENSG00000063241	391.394	382.751	409.275	386.944	294.063	330.249	272.552	219.106	270.113	334.352	284.268	319.869
U2AF2	ENSG00000063244	4082.93	4324.57	4543.25	2217.08	2036.36	2053.34	1782.71	2058.03	1938.36	2610.48	2660.9	2710.47
EPN1	ENSG00000063245	2012.33	1876.01	2201.23	1505.94	1362.93	1317.52	1067.96	1301.92	1236.07	1469	1443.58	1515.17
MED29	ENSG00000063322	782.788	809.545	839.667	639.096	656.373	544.621	594.238	781.544	641.015	649.208	717.438	654.703
AHRR	ENSG00000063438	110.717	106.961	114.637	97.6074	90.3265	92.7014	77.8721	66.5144	83.856	91.6299	84.1201	92.5936
GSC2	ENSG00000063515	0	0	0	0	0	0	0	0	0	0	0	0
ZNF275	ENSG00000063587	733.257	693.147	695.868	441.557	475.72	468.142	475.576	455.819	478.947	535.158	516.323	526.568
MTMR1	ENSG00000063601	459.378	502.296	483.688	558.919	589.13	595.607	648.934	579.066	605.537	537.107	534.695	544.338
GPC1	ENSG00000063660	946.921	888.193	1063.91	4664.24	4278.47	4183.15	2350.07	2320.18	2542.29	2444.76	2411.44	2438.3
ADCK1	ENSG00000063761	58.2721	93.3284	79.4415	98.7694	112.406	122.829	67.6746	88.0337	77.4056	71.1594	93.7891	87.9172
HAGH	ENSG00000063854	263.196	305.152	290.615	316.062	290.048	251.453	280.896	276.817	298.334	274.89	278.467	273.104
RNF4	ENSG00000063978	1532.56	1642.16	1688.38	866.847	784.837	793.756	872.353	859.796	817.596	1060.57	1040.38	1053.14
CASP8	ENSG00000064012	177.73	195.046	175.978	145.249	135.49	141.37	156.671	148.679	125.784	154.991	152.77	141.229
LIMCH1	ENSG00000064042	708.977	703.633	681.789	1740.67	1792.48	1894.59	2147.97	2389.63	2052.86	1476.8	1578.94	1515.17
INTS13	ENSG00000064102	812.896	929.09	863.801	543.813	503.821	511.017	577.551	670.034	660.366	626.787	668.126	660.314
TM7SF3	ENSG00000064115	695.38	712.022	731.063	424.127	457.654	505.223	444.056	391.261	412.83	506.889	495.052	521.891
DLX3	ENSG00000064195	0	0	1.00559	2.32399	3.01088	0	0.927049	0	0	0.974786	0.966898	0
SPA17	ENSG00000064199	232.117	224.408	249.386	66.2336	89.3229	81.1138	79.7262	133.029	123.365	123.798	141.167	146.84
TSPAN32	ENSG00000064201	1.9424	0	1.00559	10.4579	8.02902	8.11138	10.1975	10.7597	17.7388	6.8235	5.80139	9.35289
CCN5	ENSG00000064205	0	1.04863	3.01677	2.32399	1.00363	6.95261	6.48934	2.93446	4.03154	2.92436	1.9338	4.67645
DMRT3	ENSG00000064218	7.76961	1.04863	3.01677	1.16199	11.0399	8.11138	5.56229	6.84707	11.2883	4.87393	5.80139	7.48231
ST3GAL6	ENSG00000064225	198.125	192.949	188.045	72.0436	86.312	71.8436	100.121	70.427	86.2749	121.848	110.226	111.299
ATP2C2	ENSG00000064270	9.71202	10.4863	7.03912	6.97196	8.02902	13.9052	8.34344	8.80337	10.482	7.79829	8.70208	10.2882
NGFR	ENSG00000064300	793.472	801.156	878.885	6861.57	6406.16	6442.75	3147.33	3265.07	3276.84	3286.98	3379.31	3272.58
CDON	ENSG00000064309	1771.47	1751.22	1929.73	2547.09	2881.42	2881.86	2709.76	2359.3	2552.77	2254.68	2241.27	2360.67
TAF2	ENSG00000064313	895.448	921.749	821.566	556.595	610.206	640.799	772.232	773.719	696.65	726.216	733.875	696.791
HIPK2	ENSG00000064393	4870.58	4424.19	3963.03	2837.59	3049.02	3223.69	3612.71	3533.09	3026.88	3689.57	3503.07	3266.03
TNPO3	ENSG00000064419	2191.03	2198.99	2261.57	1211.96	1256.54	1214.39	1188.48	1209.97	1205.43	1488.5	1478.39	1493.66
BORCS8-MEF2B	ENSG00000064489	137.911	174.073	160.894	122.009	109.395	90.3839	74.1639	103.684	95.9506	106.252	122.796	111.299
RFXANK	ENSG00000064490	428.3	486.566	498.772	405.536	354.281	345.313	290.166	322.79	331.393	358.721	369.355	375.986
TMEM161A	ENSG00000064545	171.903	136.322	192.068	253.314	247.896	213.213	128.86	112.488	139.491	173.512	158.571	171.158
LPAR2	ENSG00000064547	53.4161	41.9454	63.3521	276.554	213.773	232.912	187.264	179.98	154.811	160.84	141.167	142.164
CTSA	ENSG00000064601	1110.08	1064.36	1235.87	2052.08	2008.26	1877.2	1003.99	1151.29	1003.05	1297.44	1351.72	1275.73
SUGP2	ENSG00000064607	1579.17	1498.5	1595.87	3150.16	3137.34	3104.34	2519.72	2310.4	2341.52	2292.7	2229.67	2235.34
SLC12A2	ENSG00000064651	752.681	697.342	619.443	1188.72	1358.91	1534.21	1450.83	1156.18	1282.84	1092.74	1031.68	1100.84
SNX24	ENSG00000064652	233.088	233.845	218.213	244.019	266.965	297.803	236.397	385.392	294.302	229.075	284.268	261.881
EYA2	ENSG00000064655	128.199	118.496	143.799	331.168	388.404	341.837	374.528	398.108	360.42	267.091	292.003	275.91
CNN2	ENSG00000064666	10115.1	10695	11532.1	4809.49	4196.17	3862.17	3138.06	3613.29	3425.2	5829.22	5825.56	5939.09
ABCA7	ENSG00000064687	21.3664	26.2158	26.1453	195.215	168.609	203.943	77.8721	63.5799	86.2749	88.7055	83.1532	96.3348
SNCAIP	ENSG00000064692	101.976	111.155	113.632	331.168	341.233	384.711	351.351	381.479	337.843	249.545	269.765	269.363
DDX20	ENSG00000064703	764.336	826.324	670.728	462.473	498.803	512.175	525.637	565.372	509.587	569.275	600.444	542.468
BTBD1	ENSG00000064726	1454.86	1468.09	1251.96	1137.59	1256.54	1161.09	1793.84	1664.82	1789.2	1433.91	1402.97	1392.65
FAR2	ENSG00000064763	466.177	483.42	397.208	127.819	182.66	174.974	232.689	198.565	208.027	272.94	272.665	250.658
BCAS1	ENSG00000064787	4.85601	9.43771	13.0727	1414.15	1333.82	1249.15	1164.37	1633.51	1123.19	805.173	969.799	774.42
POU1F1	ENSG00000064835	0	0	0	0	0	0	0	2.93446	0	0	0.966898	0
CHI3L2	ENSG00000064886	0.971202	1.04863	1.00559	2.32399	5.01814	1.15877	0.927049	0.978152	0.806308	0.974786	1.9338	0.935289
SBNO2	ENSG00000064932	552.614	478.177	520.895	355.57	314.136	356.901	243.814	261.167	270.113	369.444	333.58	361.957
PMS1	ENSG00000064933	345.748	341.855	297.654	270.744	323.168	342.995	462.597	488.098	429.762	353.847	369.355	350.733
HMG20B	ENSG00000064961	447.724	439.378	499.778	642.582	571.064	521.446	471.868	582.979	507.168	495.191	510.522	491.027
CALCRL	ENSG00000064989	123.343	109.058	95.531	225.427	249.903	276.946	309.634	287.577	287.852	212.503	208.85	215.117
TAF11	ENSG00000064995	574.951	687.904	583.242	541.489	524.897	495.953	646.153	626.018	681.33	570.25	585.94	578.009
ANKS1A	ENSG00000064999	582.721	602.965	674.75	1633.76	1644.95	1641.97	1450.83	1446.69	1479.58	1160	1190.25	1223.36
AP3D1	ENSG00000065000	4223.76	4173.56	4753.42	3035.13	2686.71	2771.77	2208.23	2687.96	2243.15	3035.48	3031.22	3086.45
ZNF76	ENSG00000065029	227.261	220.213	251.397	369.514	324.172	339.519	267.917	274.861	301.559	272.94	262.029	286.199
SLC9A3R2	ENSG00000065054	194.24	188.754	208.157	259.124	222.805	220.166	198.388	258.232	202.383	206.655	214.651	202.022
NTHL1	ENSG00000065057	114.602	126.885	148.827	134.791	123.446	114.718	113.1	105.64	110.464	116	113.127	119.717
UHRF1BP1	ENSG00000065060	708.977	699.439	673.745	551.947	590.133	601.401	607.217	611.345	624.889	604.367	606.245	612.615
GNAI3	ENSG00000065135	3120.47	3314.73	2728.16	1121.32	1211.38	1195.85	1633.46	1388.98	1686.8	1930.08	1865.15	1820.07
IPO5	ENSG00000065150	8738.87	9483.85	8444.94	4620.08	4143.98	4412.59	5421.38	5447.33	5370.01	6115.81	6040.21	5882.03
OAT	ENSG00000065154	1327.63	1461.8	1267.04	898.221	870.145	849.377	864.937	704.27	935.317	998.181	961.096	982.989
WDR3	ENSG00000065183	1718.06	1837.21	1630.06	979.56	918.32	936.284	1074.45	1085.75	1045.78	1225.31	1217.32	1161.63
PKN2	ENSG00000065243	1101.34	988.862	878.885	621.666	715.587	812.296	1000.29	921.42	864.362	892.904	837.334	824.925
WDR18	ENSG00000065268	531.247	472.934	549.052	323.034	258.936	257.246	229.908	184.871	246.73	348.973	289.102	334.834
TRAM2	ENSG00000065308	6814.92	7197.82	6966.72	1501.29	1579.71	1632.7	1242.25	1134.66	1254.62	3134.91	3093.11	3084.58
NTN1	ENSG00000065320	135.968	102.766	164.917	460.149	477.727	432.22	516.366	595.695	458.789	354.822	380.958	345.122
GLP2R	ENSG00000065325	0	1.04863	1.00559	1.16199	0	2.31754	0	0.978152	0	0	0.966898	0.935289
MCM10	ENSG00000065328	1558.78	1590.78	1518.44	209.159	179.649	196.991	239.179	328.659	244.311	663.829	654.59	618.226
DGKA	ENSG00000065357	214.636	240.137	249.386	234.723	237.86	261.882	146.474	150.635	152.392	189.108	200.148	206.699
ERBB3	ENSG00000065361	76.7249	91.2312	113.632	2238	2135.72	2373.16	1629.75	1676.55	1483.61	1222.38	1266.64	1247.68
ROPN1	ENSG00000065371	0	0	1.00559	0	1.00363	0	0	0	0	0	0	0
ANKRD44	ENSG00000065413	125.285	126.885	119.665	794.803	961.476	990.747	851.031	837.298	819.209	562.452	623.649	620.097
KARS1	ENSG00000065427	4158.68	4671.66	4807.72	2451.81	2147.76	2137.93	2433.5	2567.65	2605.99	2930.21	2971.28	3073.36
ADAT1	ENSG00000065457	565.239	545.29	577.208	287.012	335.212	278.104	317.051	277.795	294.302	380.167	366.454	367.569
PDIA5	ENSG00000065485	685.668	690.001	679.778	498.495	497.799	508.699	323.54	356.047	374.127	482.519	489.25	491.962
TBC1D22B	ENSG00000065491	195.212	225.456	233.297	181.271	152.551	159.91	153.89	155.526	149.167	169.613	169.207	173.029
NDUFB4	ENSG00000065518	746.854	915.457	984.472	978.398	847.062	756.675	920.559	1043.69	996.597	846.114	897.281	894.137
SPEN	ENSG00000065526	2178.41	1966.19	2087.6	1745.31	1894.85	1958.32	1854.1	2030.64	1601.33	1866.72	1881.58	1792.95
MYLK	ENSG00000065534	449.666	498.101	467.599	406.698	463.676	449.602	881.623	895.009	874.844	573.174	596.576	604.197
ZC3H15	ENSG00000065548	2054.09	2247.22	1859.33	1139.92	1156.18	1159.93	1455.47	1909.35	1526.34	1515.79	1691.1	1478.69
MAP2K4	ENSG00000065559	709.948	782.281	732.069	592.616	556.01	543.462	697.141	723.833	698.263	647.258	657.491	643.479
PACC1	ENSG00000065600	208.808	210.775	210.168	174.299	182.66	141.37	152.036	140.854	152.392	171.562	170.174	161.805
SNAP91	ENSG00000065609	108.775	113.252	92.5142	262.61	280.012	286.216	266.063	279.752	245.118	202.756	216.585	200.152
SLK	ENSG00000065613	2063.8	1970.38	1832.18	999.314	1150.16	1193.53	1503.67	1764.59	1399.75	1497.27	1556.71	1430.06
CYB5R4	ENSG00000065615	205.895	208.678	154.861	184.757	194.704	187.72	273.479	267.036	271.726	216.403	214.651	203.893
COL17A1	ENSG00000065618	12.6256	12.5836	10.0559	1.16199	4.01451	1.15877	0	0	0.806308	4.87393	4.83449	3.74116
GSTO2	ENSG00000065621	34.9633	27.2645	25.1397	15.1059	19.0689	18.5403	13.9057	13.6941	16.1262	20.4705	19.338	18.7058
SEC61A2	ENSG00000065665	455.494	461.399	459.554	395.078	393.422	362.694	355.06	378.545	375.739	386.99	392.561	385.339
PRKCQ	ENSG00000065675	23.3088	17.8268	25.1397	158.031	124.45	119.353	119.589	129.116	110.464	93.5795	87.9877	82.3055
TLE2	ENSG00000065717	12.6256	9.43771	20.1118	24.4019	19.0689	24.3341	34.3008	52.8202	38.7028	23.3949	26.1062	28.0587
ASB1	ENSG00000065802	679.841	751.871	788.382	1691.86	1481.35	1538.84	1270.98	974.24	1286.87	1146.35	1027.81	1156.02
FAM107B	ENSG00000065809	573.98	619.743	524.918	228.913	235.853	203.943	336.519	294.424	352.357	374.318	363.554	353.539
ME1	ENSG00000065833	265.138	291.52	243.353	138.277	147.533	184.244	176.139	168.242	153.199	189.108	192.413	184.252
TBC1D1	ENSG00000065882	1690.86	1709.27	1839.22	2455.29	2342.47	2237.58	2147.05	2311.37	2199.61	2005.13	2039.19	2023.03
CDK13	ENSG00000065883	944.979	943.771	932.181	855.227	909.287	1008.13	999.359	1057.38	949.831	905.576	930.156	927.807
MTHFD2	ENSG00000065911	2655.26	2749.52	2536.1	693.71	715.587	736.976	937.246	920.441	932.898	1410.52	1377.83	1344.95
SLC9A7	ENSG00000065923	300.101	289.423	251.397	453.177	484.752	507.54	377.309	306.162	304.784	359.696	345.183	332.028
FOXJ2	ENSG00000065970	519.593	531.657	548.046	441.557	455.647	435.697	443.129	452.885	426.537	452.301	459.276	451.745
YBX1	ENSG00000065978	16324.9	17340.2	18850.8	10524.2	9851.61	8440.47	17399.8	30680.7	19317.5	14502.9	18602.1	15584.7
PDE4A	ENSG00000065989	133.055	137.371	173.967	304.442	288.041	282.739	266.063	283.664	228.185	223.226	228.188	217.922
PPP2R5A	ENSG00000066027	303.015	327.174	294.638	323.034	331.197	333.725	431.078	328.659	454.758	343.125	315.209	357.281
CTNNA2	ENSG00000066032	135.968	126.885	128.715	199.863	189.686	209.737	260.501	211.281	212.865	193.008	169.207	178.64
ELAVL1	ENSG00000066044	3156.4	3146.95	3130.4	1754.61	1657.99	1600.26	1835.56	1965.11	1935.14	2190.34	2147.48	2149.29
TIE1	ENSG00000066056	82.5521	70.2585	74.4136	13.9439	6.02177	6.95261	4.63524	3.91261	4.03154	33.1427	25.1393	26.1881
DIP2B	ENSG00000066084	1095.52	1148.25	1003.58	1301.43	1319.77	1465.84	1493.48	1362.57	1303.8	1253.57	1226.03	1209.33
SMARCD1	ENSG00000066117	1484	1488.01	1560.67	1094.6	1064.85	967.571	920.559	971.305	828.885	1124.9	1119.67	1064.36
KDM4A	ENSG00000066135	823.579	795.913	830.617	999.314	979.541	918.903	909.435	916.529	911.934	873.408	861.506	857.66
NFYC	ENSG00000066136	734.228	751.871	903.019	768.077	679.456	640.799	707.338	809.91	724.065	708.669	716.471	732.332
ZMYND12	ENSG00000066185	3.88481	2.09727	1.00559	3.48598	5.01814	6.95261	2.78115	9.78152	10.482	2.92436	5.80139	6.54703
SLC9A3	ENSG00000066230	34.9633	20.9727	33.1844	133.629	118.428	142.528	62.1123	46.9513	68.5362	71.1594	59.9477	74.8231
NGEF	ENSG00000066248	33.9921	39.8481	44.2459	8.13395	12.0435	17.3815	14.8328	16.6286	17.7388	18.5209	21.2718	25.2528
ASPM	ENSG00000066279	3063.17	2795.66	2258.55	460.149	644.329	714.96	900.164	1086.73	809.533	1469	1424.24	1205.59
CD84	ENSG00000066294	0.971202	1.04863	0	0	0	2.31754	0	1.9563	0	0	0.966898	0.935289
ELOVL1	ENSG00000066322	1206.23	1307.65	1318.33	762.267	699.529	603.718	444.983	435.278	499.911	773.005	769.651	764.131
SPI1	ENSG00000066336	0.971202	0	0	0	0	1.15877	0.927049	0	0.806308	0.974786	0	0.935289
POLR1H	ENSG00000066379	216.578	213.921	252.403	192.891	155.562	159.91	165.942	140.854	177.388	184.235	162.439	189.864
MPPED2	ENSG00000066382	98.0914	104.863	106.592	139.439	110.399	129.782	190.972	150.635	162.068	138.42	116.995	130.941
CLDN18	ENSG00000066405	0.971202	6.2918	8.04471	6.97196	17.0617	10.4289	7.41639	6.84707	6.45046	4.87393	9.66898	7.48231
ZBTB11	ENSG00000066422	635.166	592.478	543.018	425.289	423.531	433.379	515.439	520.377	538.614	511.763	489.25	492.897
ATXN3	ENSG00000066427	380.711	396.384	412.292	475.255	534.934	577.066	606.29	479.295	541.839	472.771	451.541	492.897
GOLGA5	ENSG00000066455	686.639	746.627	738.102	714.626	679.456	677.879	657.278	860.774	753.898	659.93	730.975	702.402
FGFR2	ENSG00000066468	108.775	122.69	128.715	271.906	291.052	275.787	419.026	444.081	341.875	259.293	277.5	245.981
LRRC40	ENSG00000066557	738.113	746.627	532.962	160.355	262.951	259.564	427.37	419.627	412.023	441.578	452.508	394.692
ISOC1	ENSG00000066583	264.167	313.542	305.699	123.171	119.432	139.052	159.452	170.199	178.194	178.386	190.479	201.087
EML1	ENSG00000066629	491.428	448.815	450.504	700.682	749.71	738.135	837.125	716.008	764.38	654.081	614.947	634.126
TRMT11	ENSG00000066651	221.434	233.845	192.068	192.891	185.671	166.863	209.513	241.604	222.541	201.781	210.784	190.799
THUMPD1	ENSG00000066654	1211.09	1280.38	1081.01	549.623	638.307	706.848	856.593	897.944	847.43	858.787	894.381	852.984
MSANTD3	ENSG00000066697	993.539	1064.36	983.466	246.343	239.867	219.007	281.823	357.026	290.271	500.065	522.125	476.062
KIF26A	ENSG00000066735	112.659	101.717	138.771	376.486	399.444	444.967	262.355	216.172	281.401	234.923	231.089	271.234
ATG2B	ENSG00000066739	687.611	620.791	567.152	568.215	672.431	849.377	803.751	616.236	624.082	670.653	610.113	645.35
ARFGEF1	ENSG00000066777	1047.93	1031.86	937.209	942.376	1013.66	1190.05	1189.4	1203.13	1094.16	1031.32	1039.42	1033.49
ACSM2B	ENSG00000066813	0	0	0	0	0	0	0.927049	0.978152	0	0	0	0
ZFAT	ENSG00000066827	64.0993	70.2585	74.4136	95.2834	93.3374	84.5901	74.1639	79.2303	73.374	74.0837	77.3518	73.8879
MTFR1	ENSG00000066855	452.58	520.122	446.482	189.405	248.9	237.547	320.759	319.856	279.789	316.805	345.183	310.516
STAG3	ENSG00000066923	126.256	109.058	135.755	331.168	379.371	410.204	333.738	320.834	287.046	251.495	261.062	263.752
FECH	ENSG00000066926	341.863	414.21	353.967	335.816	318.15	342.995	343.935	287.577	335.424	328.503	323.911	332.028
MYO9A	ENSG00000066933	862.427	973.132	858.773	1241.01	1383	1601.42	1611.21	1448.64	1393.3	1199.96	1220.23	1235.52
DDX3Y	ENSG00000067048	1948.23	2037.5	1699.45	1026.04	1295.68	1385.89	1674.25	1616.89	1665.83	1525.54	1575.08	1544.16
PFKP	ENSG00000067057	4318.93	4365.46	4645.82	593.778	481.741	513.334	573.843	471.469	588.605	1812.13	1651.46	1806.04
IDI1	ENSG00000067064	1886.07	1860.28	1582.8	1069.03	1317.76	1264.22	2123.87	1990.54	2159.29	1674.68	1650.49	1665.75
SP100	ENSG00000067066	447.724	506.49	467.599	230.075	313.132	273.469	260.501	319.856	274.951	305.108	361.62	324.545
KLF6	ENSG00000067082	3266.15	3222.45	3028.83	1674.43	1639.93	1719.61	1608.43	1543.52	1634.39	2125.03	2025.65	2033.32
PLPP1	ENSG00000067113	274.85	305.152	254.414	614.694	557.013	541.145	602.582	682.75	645.853	474.721	497.952	474.192
NEO1	ENSG00000067141	945.95	990.959	1014.64	1902.18	1946.03	1936.3	1562.08	1650.14	1448.13	1395.89	1473.55	1395.45
TRAM1	ENSG00000067167	3310.83	3283.27	2544.14	1375.8	1877.79	1720.77	2488.2	2279.1	2242.34	2364.83	2363.1	2118.43
PHKA1	ENSG00000067177	180.643	210.775	196.09	287.012	309.117	298.962	191.899	191.718	211.253	207.629	227.221	222.599
TNFRSF1A	ENSG00000067182	1676.29	1697.74	1874.42	1109.7	1021.69	1055.64	742.566	827.517	795.826	1131.73	1122.57	1172.85
CACNB1	ENSG00000067191	243.772	267.402	262.459	1906.83	1674.05	1662.83	1321.04	1553.31	1433.62	1078.11	1131.27	1083.07
EVI5	ENSG00000067208	611.857	554.727	529.945	445.043	477.727	487.841	667.475	550.7	599.087	563.426	505.688	527.503
STOML1	ENSG00000067221	145.68	168.83	160.894	210.321	187.678	179.609	135.349	121.291	151.586	154.991	151.803	157.129
PKM	ENSG00000067225	32464.4	33706.2	35961.9	16635.1	13957.5	14210	16779.6	19838.9	17559	21394.6	21379.1	21761.4
DHX29	ENSG00000067248	1279.07	1352.74	1116.2	1007.45	978.537	1013.92	1163.45	1176.72	1230.43	1117.1	1117.73	1094.29
DNTTIP2	ENSG00000067334	1865.68	1953.61	1865.37	915.65	751.717	854.012	916.851	1132.7	1053.84	1201.91	1215.39	1215.88
METTL22	ENSG00000067365	268.052	236.991	295.643	288.174	282.019	300.121	241.96	228.888	222.541	255.394	238.824	258.14
TP53BP1	ENSG00000067369	2244.45	2410.81	2287.72	3097.87	2983.79	3197.04	2972.12	2933.48	2674.52	2659.22	2665.74	2603.85
TRO	ENSG00000067445	627.396	615.548	711.957	2250.78	2146.76	2267.71	1637.17	1715.68	1595.68	1413.44	1443.58	1447.83
RRP15	ENSG00000067533	978	1090.58	945.254	429.937	401.451	458.872	699.922	684.707	599.087	693.073	689.398	648.156
RHOA	ENSG00000067560	9577.02	10627.9	10330.4	4988.44	4544.43	4462.42	5486.27	5830.77	5650.61	6522.29	6647.42	6588.18
DHX8	ENSG00000067596	1167.38	1275.14	1163.47	871.495	749.71	801.867	748.128	718.942	708.745	896.803	869.241	850.178
PMS2P4	ENSG00000067601	33.0209	44.0426	28.1565	30.2118	19.0689	28.9692	41.7172	27.3883	33.0586	34.1175	29.0069	28.994
PRKCZ	ENSG00000067606	161.219	142.614	166.928	141.763	113.41	113.559	109.392	110.531	112.077	131.596	116.995	125.329
ZFY	ENSG00000067646	236.002	199.24	183.017	195.215	234.849	210.896	353.206	318.878	284.627	257.344	241.724	223.534
IARS2	ENSG00000067704	2166.75	2431.78	2164.03	1603.55	1541.57	1667.47	1507.38	1276.49	1470.71	1701.98	1663.06	1688.2
SYT1	ENSG00000067715	214.636	204.484	183.017	204.511	201.729	232.912	204.878	206.39	213.672	200.806	195.313	202.022
NAV3	ENSG00000067798	1658.81	1476.48	1340.45	2599.38	2878.4	3044.08	2535.48	2409.19	2197.19	2170.85	2171.65	2083.82
IDH3G	ENSG00000067829	645.849	638.618	664.694	773.887	670.423	624.576	461.67	694.488	507.974	594.619	640.086	570.526
ROGDI	ENSG00000067836	144.709	171.976	184.023	178.947	173.628	203.943	142.766	189.762	144.329	148.167	171.141	167.417
PDZD4	ENSG00000067840	308.842	345.001	361.006	347.436	353.277	354.583	318.905	292.468	324.942	311.932	316.176	332.963
ATP2B3	ENSG00000067842	8.74081	11.535	8.04471	32.5358	40.1451	31.2867	30.5926	40.1042	33.0586	22.4201	29.9738	23.3822
ROCK1	ENSG00000067900	2031.75	1914.81	1771.85	986.532	1083.92	1234.09	1436	1589.5	1364.27	1459.25	1460.02	1408.55
CBFB	ENSG00000067955	1275.19	1275.14	1033.75	356.732	464.68	460.031	765.742	641.668	695.037	794.451	752.247	712.69
PDK3	ENSG00000067992	107.803	112.204	94.5254	15.1059	41.1487	38.2393	47.2795	56.7328	48.3785	56.5376	66.716	57.9879
HYAL2	ENSG00000068001	597.289	590.381	572.18	550.785	532.926	536.51	376.382	358.004	393.478	485.443	470.879	474.192
HDAC4	ENSG00000068024	354.489	335.563	351.956	460.149	482.745	502.905	444.983	406.911	398.316	403.561	392.561	398.433
RASSF1	ENSG00000068028	370.999	390.092	387.152	343.95	295.067	268.834	253.084	223.019	266.888	309.007	288.136	295.551
FGFR3	ENSG00000068078	132.083	143.663	138.771	173.137	188.682	192.355	262.355	200.521	251.568	184.235	171.141	191.734
IFI35	ENSG00000068079	33.9921	19.924	37.2068	37.1838	36.1306	32.4455	25.0303	29.3446	29.8334	30.2184	27.0731	31.7998
HEATR6	ENSG00000068097	555.527	566.262	552.068	548.461	463.676	504.064	442.202	489.076	445.082	494.217	484.416	478.868
COASY	ENSG00000068120	695.38	651.202	770.281	554.271	430.556	476.254	392.142	407.89	387.834	525.41	472.813	517.215
PLEKHH3	ENSG00000068137	156.363	144.711	155.866	461.311	412.491	406.728	237.324	222.041	228.185	264.167	250.427	245.981
MEF2A	ENSG00000068305	690.524	652.25	610.393	598.426	639.311	683.673	1000.29	999.672	927.254	748.636	734.842	731.396
OTUD5	ENSG00000068308	901.275	892.387	1002.57	744.837	713.579	680.197	566.427	723.833	588.605	708.669	741.611	721.108
TFE3	ENSG00000068323	801.241	787.524	925.142	690.224	718.598	713.801	567.354	649.493	632.952	659.93	686.497	723.914
TBC1D25	ENSG00000068354	182.586	189.803	192.068	211.483	178.646	181.927	156.671	159.439	164.487	175.461	168.24	172.093
ACSL4	ENSG00000068366	1956	1899.08	1590.84	777.373	838.029	866.758	1108.75	1074.01	1048.2	1260.4	1206.69	1131.7
INPP5A	ENSG00000068383	732.286	755.016	755.197	716.95	659.384	658.18	730.514	682.75	740.997	701.846	669.093	697.726
GPKOW	ENSG00000068394	337.978	337.66	375.085	278.878	197.715	224.801	195.607	234.757	226.573	259.293	244.625	264.687
GRIPAP1	ENSG00000068400	447.724	407.919	444.47	689.062	550.992	629.211	483.919	579.066	488.623	511.763	493.118	495.703
FTSJ1	ENSG00000068438	1026.56	1001.45	1158.44	471.769	422.527	425.268	381.944	411.802	387.834	609.241	579.172	623.838
PRR11	ENSG00000068489	2703.83	2859.62	2897.1	425.289	384.389	393.981	577.551	740.461	524.1	1226.28	1246.33	1206.52
REEP1	ENSG00000068615	253.484	290.472	220.224	1123.65	1200.34	1256.1	1066.11	936.092	1071.58	773.005	783.187	820.249
ATP11A	ENSG00000068650	553.585	535.852	530.951	447.367	573.072	578.225	558.083	497.88	463.627	505.914	512.456	499.445
POLR1A	ENSG00000068654	2949.54	2840.75	2855.87	1984.68	1999.23	2107.8	1938.46	1651.12	1722.27	2221.54	2059.49	2118.43
LAPTM4A	ENSG00000068697	2527.07	2766.3	2486.82	3828.77	4097.81	3892.3	3427.3	3106.61	3487.28	3117.37	3189.8	3166.89
TTC7A	ENSG00000068724	310.784	303.055	355.979	190.567	204.74	194.673	118.662	123.247	135.46	198.856	199.181	215.117
IP6K2	ENSG00000068745	744.912	807.448	856.762	1251.47	1187.29	1071.86	1012.34	1200.19	1064.33	954.316	1024.91	965.219
STON1-GTF2A1L	ENSG00000068781	118.487	131.079	116.648	262.61	274.994	252.611	312.415	373.654	287.046	222.251	251.393	215.117
SRBD1	ENSG00000068784	543.873	598.77	559.108	298.632	257.932	266.517	318.905	387.348	320.911	377.242	394.494	369.439
KIF2A	ENSG00000068796	1599.57	1646.36	1403.8	958.644	1068.86	1156.45	1327.53	1435.93	1314.28	1268.2	1322.72	1254.22
RASGRP2	ENSG00000068831	10.6832	6.2918	8.04471	122.009	105.381	113.559	104.757	96.8371	99.9822	74.0837	67.6829	72.0173
PSME4	ENSG00000068878	2445.49	2594.32	2470.73	1497.81	1506.45	1688.32	1550.03	1525.92	1531.18	1779.96	1783.93	1812.59
IFT80	ENSG00000068885	508.91	513.831	454.526	472.931	588.126	606.036	748.128	730.68	706.326	564.401	587.874	577.074
SIRT2	ENSG00000068903	564.268	518.025	676.761	1532.67	1318.77	1273.49	1342.37	1580.69	1370.72	1087.86	1103.23	1082.13
ERLEC1	ENSG00000068912	828.435	971.035	781.343	614.694	705.55	691.784	654.496	715.029	731.321	678.451	760.949	710.82
PPP2R5B	ENSG00000068971	196.183	190.851	186.034	287.012	224.813	241.024	184.483	168.242	186.257	210.554	186.611	194.54
PYGM	ENSG00000068976	10.6832	10.4863	13.0727	690.224	613.217	646.592	415.318	494.945	445.082	342.15	363.554	349.798
PAGE1	ENSG00000068985	0	0	0	0	0	0	0	0	0	0	0	0
PITX1	ENSG00000069011	140.824	124.787	156.872	122.009	89.3229	104.289	96.4131	109.553	125.784	115.025	103.458	125.329
TRPC7	ENSG00000069018	1.9424	1.04863	3.01677	3.48598	11.0399	4.63507	0.927049	2.93446	3.22523	1.94957	4.83449	3.74116
MAST4	ENSG00000069020	263.196	217.067	233.297	239.371	315.139	329.09	339.3	350.179	309.622	273.915	283.301	280.587
ADGRF5	ENSG00000069122	52.4449	37.7508	30.1677	72.0436	77.2793	100.813	87.1426	90.9682	78.2119	68.235	66.716	66.4055
SDK2	ENSG00000069188	547.758	481.323	524.918	2172.93	2218.02	2397.49	1816.09	1791	1670.67	1427.09	1450.35	1453.44
ADAM7	ENSG00000069206	0	0	0	0	0	1.15877	0.927049	0.978152	0	0	0	0
NUP133	ENSG00000069248	1314.04	1414.61	1294.19	821.529	758.743	823.884	868.645	807.954	899.84	973.811	944.659	970.83
NUCKS1	ENSG00000069275	12099.2	12365.5	11040.4	5995.88	6698.21	6477.51	9796.12	9818.69	9462.02	9158.12	9186.5	8824.45
VPS35	ENSG00000069329	2797.06	2830.26	2634.64	1648.87	1694.12	1752.06	1977.4	1958.26	2043.99	2089.94	2059.49	2078.21
DNAJA2	ENSG00000069345	1538.38	1730.25	1440	998.152	958.465	902.68	1145.83	1275.51	1133.67	1195.09	1259.87	1127.96
BCL3	ENSG00000069399	100.034	103.815	119.665	55.7757	72.2612	75.3199	63.0393	108.575	76.5993	71.1594	90.8884	86.9819
KCNAB2	ENSG00000069424	39.8193	44.0426	50.2795	97.6074	104.377	89.2251	73.2369	66.5144	79.8245	66.2855	68.6497	70.1467
ABCC9	ENSG00000069431	33.0209	50.3344	35.1956	664.66	801.899	894.569	788.919	709.16	693.425	473.746	506.654	520.021
GAL	ENSG00000069482	73.8113	90.1825	78.4359	2.32399	3.01088	0	1.8541	1.9563	1.61262	26.3192	29.0069	25.2528
CLEC2D	ENSG00000069493	88.3793	84.9393	74.4136	173.137	163.591	181.927	194.68	181.936	214.478	146.218	138.266	155.258
FUNDC1	ENSG00000069509	151.507	187.705	170.95	133.629	113.41	129.782	206.732	228.888	185.451	160.84	169.207	159.934
MAOB	ENSG00000069535	1.9424	4.19454	3.01677	63.9096	64.2322	49.827	84.3614	93.9026	104.82	47.7645	53.1794	55.1821
RORA	ENSG00000069667	154.421	137.371	146.816	176.623	231.838	245.659	460.743	318.878	366.064	262.217	221.42	253.463
DRD4	ENSG00000069696	1.9424	4.19454	6.03353	17.4299	5.01814	15.064	10.1975	19.563	12.0946	8.77307	9.66898	10.2882
TGFBR3	ENSG00000069702	257.368	255.867	227.263	1526.86	1899.87	1891.11	1819.8	1594.39	1754.53	1151.22	1214.42	1257.96
NA	ENSG00000069712	47.5889	33.5563	46.2571	49.9657	69.2503	62.5735	67.6746	87.0556	91.1128	53.6132	60.9146	66.4055
PLA2G10	ENSG00000069764	0.971202	2.09727	5.02795	2.32399	4.01451	1.15877	0.927049	2.93446	5.64416	0.974786	2.90069	3.74116
HES2	ENSG00000069812	2.9136	4.19454	2.01118	22.0779	16.058	26.6517	7.41639	12.716	16.1262	9.74786	10.6359	14.0293
ATP1B3	ENSG00000069849	2329.91	2417.1	2196.21	2260.08	1983.17	2108.96	1826.29	1386.04	1765.81	2051.92	1836.14	1931.37
NEDD4	ENSG00000069869	933.325	944.819	811.51	296.308	348.259	310.55	324.467	334.528	309.622	508.838	512.456	454.551
PIGB	ENSG00000069943	144.709	138.42	105.587	106.903	137.497	113.559	143.693	125.204	133.847	128.672	127.631	115.041
MAPK6	ENSG00000069956	2361.96	2403.47	2076.54	970.264	1035.74	1061.43	1597.31	1722.53	1484.41	1621.07	1638.89	1503.01
GNB5	ENSG00000069966	193.269	202.386	180	174.299	139.504	185.403	139.984	121.291	138.685	162.789	146.968	158.999
RAB27A	ENSG00000069974	328.266	359.681	296.649	106.903	107.388	122.829	126.079	139.876	127.397	184.235	191.446	173.964
HDHD5	ENSG00000069998	559.412	618.694	669.722	493.847	416.506	402.092	446.838	359.96	501.524	481.544	442.839	509.733
UFD1	ENSG00000070010	1246.05	1405.17	1523.47	691.386	728.634	607.194	618.342	709.16	595.862	826.619	899.215	866.078
LRP6	ENSG00000070018	911.958	922.798	847.712	1180.58	1421.14	1551.59	1573.2	1488.75	1328.8	1186.31	1230.86	1194.36
GUCY2C	ENSG00000070019	3.88481	2.09727	2.01118	2.32399	3.01088	8.11138	6.48934	1.9563	1.61262	3.89914	1.9338	3.74116
SCT	ENSG00000070031	9.71202	15.7295	7.03912	40.6698	40.1451	44.0332	67.6746	96.8371	99.1759	38.0167	49.3118	52.3762
PHRF1	ENSG00000070047	1313.06	1257.31	1442.01	1038.82	872.153	885.299	739.785	833.386	763.574	989.408	940.792	980.183
ELP1	ENSG00000070061	1474.28	1526.81	1368.61	1343.26	1249.52	1298.98	1282.11	1052.49	1206.24	1317.91	1217.32	1240.19
NUCB2	ENSG00000070081	1096.49	1148.25	1196.65	808.747	787.848	798.391	628.539	854.905	697.456	812.972	887.612	855.79
PFN2	ENSG00000070087	4213.07	4567.85	4075.65	2042.78	2326.41	2164.58	3291.02	2927.61	3290.54	3133.94	3115.34	3118.25
PTPN3	ENSG00000070159	82.5521	74.453	67.3745	53.4517	46.1669	28.9692	54.6959	39.1261	50.7974	61.4115	50.2787	48.635
SPTB	ENSG00000070182	173.845	138.42	152.85	5039.56	4667.87	5242.27	2995.29	2608.73	2772.09	2516.9	2400.81	2529.96
DAPP1	ENSG00000070190	1.9424	1.04863	0	2.32399	1.00363	1.15877	4.63524	2.93446	0.806308	2.92436	1.9338	0.935289
FGF10	ENSG00000070193	9.71202	10.4863	3.01677	10.4579	10.0363	11.5877	11.1246	25.432	11.2883	9.74786	14.5035	8.4176
SLC44A1	ENSG00000070214	697.323	696.293	584.247	2110.18	2382.61	2368.52	2395.49	2371.04	2231.86	1662.99	1760.72	1681.65
TMEM260	ENSG00000070269	227.261	213.921	203.129	323.034	349.263	345.313	345.789	295.402	336.23	287.562	275.566	286.199
SMG6	ENSG00000070366	876.995	929.09	992.516	1178.26	1073.88	1071.86	900.164	1054.45	882.101	938.719	977.534	937.16
EXOC5	ENSG00000070367	1550.04	1585.53	1180.56	757.619	914.305	921.22	1481.42	1341.05	1348.95	1249.68	1223.13	1135.44
CLTCL1	ENSG00000070371	216.578	219.164	264.47	398.564	375.357	392.822	297.583	280.73	292.69	288.537	280.4	301.163
FGF22	ENSG00000070388	0	2.09727	2.01118	2.32399	7.0254	5.79384	0.927049	2.93446	3.22523	0.974786	3.86759	3.74116
FSTL3	ENSG00000070404	434.127	443.572	535.979	333.492	338.223	253.77	318.905	290.511	345.1	349.948	340.348	367.569
DGCR2	ENSG00000070413	866.312	787.524	876.874	1636.09	1487.38	1458.89	1117.09	1078.9	1194.95	1138.55	1075.19	1126.09
RNF126	ENSG00000070423	828.435	759.211	847.712	410.184	398.44	301.28	310.561	357.026	337.843	501.04	478.614	474.192
MNT	ENSG00000070444	504.054	467.691	546.035	520.573	500.81	508.699	399.558	412.78	387.028	454.25	440.905	455.486
ZXDC	ENSG00000070476	360.316	354.438	373.074	422.965	433.567	455.396	359.695	325.725	374.127	364.57	355.818	382.533
JMJD6	ENSG00000070495	558.441	559.971	579.219	527.545	461.669	487.841	441.275	466.579	462.821	489.343	473.78	490.092
POLB	ENSG00000070501	304.957	379.605	366.034	242.857	278.005	230.595	273.479	330.616	314.46	266.117	315.209	297.422
ST6GALNAC1	ENSG00000070526	0.971202	0	0	0	1.00363	1.15877	0	0	0	0	0	0
WIPI1	ENSG00000070540	380.711	421.551	454.526	873.819	905.272	842.424	717.536	893.053	824.853	622.888	714.538	686.502
FRMPD1	ENSG00000070601	36.9057	44.0426	42.2347	218.455	207.751	221.325	160.379	145.745	187.87	129.647	128.597	144.97
GBA2	ENSG00000070610	571.066	553.679	617.432	1508.27	1399.06	1431.08	1013.26	1066.19	1019.98	967.963	970.765	970.83
NDST1	ENSG00000070614	3163.2	3200.43	3329.51	2484.34	2418.74	2619.97	2008.91	1985.65	1997.22	2457.44	2414.34	2509.38
ASNS	ENSG00000070669	1991.93	2334.26	2202.24	962.13	952.443	932.808	832.49	832.408	859.524	1227.26	1297.58	1266.38
AP3M2	ENSG00000070718	502.111	577.797	573.186	633.286	596.155	606.036	628.539	574.175	577.316	565.376	557.9	563.979
CNGB1	ENSG00000070729	0	2.09727	5.02795	4.64797	2.00726	6.95261	1.8541	3.91261	3.22523	1.94957	2.90069	4.67645
ST6GALNAC2	ENSG00000070731	1769.53	1922.15	1846.26	2628.43	2056.43	2019.73	2240.68	2298.66	2467.3	2112.36	2008.25	2069.8
CHAT	ENSG00000070748	0.971202	0	1.00559	0	1.00363	1.15877	2.78115	2.93446	1.61262	0.974786	0.966898	0.935289
PABPC1	ENSG00000070756	24075.1	24091.3	25303.6	16294.6	16508.7	15723.3	16747.1	26567.6	18008.9	18481	21460.3	19038.7
TESK2	ENSG00000070759	37.8769	37.7508	44.2459	42.9937	33.1197	30.128	29.6656	39.1261	30.6397	35.0923	34.8083	33.6704
CFAP20	ENSG00000070761	644.878	697.342	714.974	517.087	461.669	422.95	510.804	770.784	498.298	539.057	616.881	528.438
CSNK2A2	ENSG00000070770	2202.69	2228.35	2137.88	1318.86	1307.73	1316.36	1426.73	1524.94	1438.45	1605.47	1606.98	1573.16
PTPN21	ENSG00000070778	674.985	645.959	615.421	1337.45	1332.82	1348.81	1355.35	1481.9	1326.38	1075.19	1114.83	1066.23
EIF2B3	ENSG00000070785	633.223	744.53	642.571	405.536	346.252	382.393	337.446	402.999	383.803	443.528	472.813	450.809
CAMK2A	ENSG00000070808	20.3952	15.7295	13.0727	643.744	660.387	614.147	482.992	459.732	486.204	355.797	368.388	357.281
TCOF1	ENSG00000070814	2930.12	3032.65	3161.57	1058.58	919.323	1020.87	817.657	1037.82	854.686	1562.58	1569.28	1585.32
CDC42	ENSG00000070831	4478.21	4788.06	4657.89	2473.88	2489	2252.64	2960.99	3134	3197.01	3227.52	3303.89	3286.61
OSBPL3	ENSG00000070882	505.025	472.934	447.487	211.483	207.751	235.23	206.732	183.893	203.19	300.234	272.665	280.587
EPHA8	ENSG00000070886	0.971202	1.04863	3.01677	4.64797	0	2.31754	0.927049	0	0.806308	1.94957	0	1.87058
SLC12A3	ENSG00000070915	0.971202	0	1.00559	0	0	1.15877	1.8541	0.978152	0.806308	0.974786	0	0.935289
RAD18	ENSG00000070950	947.893	873.512	784.359	112.713	157.57	156.434	159.452	181.936	165.293	404.536	379.024	348.863
ATP2B1	ENSG00000070961	2401.78	2356.28	2147.94	2793.43	3209.6	3388.24	3218.71	2969.67	3055.91	2712.83	2733.42	2759.1
TRPM5	ENSG00000070985	1.9424	2.09727	1.00559	2.32399	3.01088	4.63507	4.63524	2.93446	1.61262	2.92436	2.90069	1.87058
NCK2	ENSG00000071051	696.351	725.655	714.974	758.781	683.471	690.626	771.305	900.878	807.921	715.493	739.677	720.173
MAP4K4	ENSG00000071054	11660.2	12000.6	11857.9	8190.89	7958.77	8224.93	7000.15	8309.4	6717.35	8645.38	8982.48	8486.82
MGAT4A	ENSG00000071073	67.9841	59.7721	60.3353	54.6137	67.2431	64.891	96.4131	72.3833	86.2749	72.1342	63.8153	69.2114
RPL31	ENSG00000071082	4957.01	6068.44	5956.1	9218.09	7973.82	7658.3	10188.3	10396.8	11208.5	7807.06	7851.21	8240.83
WDR1	ENSG00000071127	12429.4	13078.6	13243.6	4017.01	3498.65	3367.38	3138.06	3258.23	3180.08	6381.92	6217.15	6241.19
SNX13	ENSG00000071189	591.462	686.855	522.906	519.411	682.467	648.91	897.383	853.927	788.569	657.981	711.637	641.608
MS4A12	ENSG00000071203	0.971202	0	1.00559	0	0	0	0	0	0	0	0	0
ARHGAP10	ENSG00000071205	850.773	895.533	919.108	628.638	636.3	616.465	493.19	555.591	541.033	633.611	662.325	660.314
RPS6KA2	ENSG00000071242	1059.58	1109.45	1177.54	1170.13	1050.8	1120.53	902.946	985.978	932.092	998.181	1003.64	1026.95
ING3	ENSG00000071243	194.24	218.116	193.073	141.763	151.548	172.656	215.075	247.473	217.703	180.335	197.247	190.799
VASH1	ENSG00000071246	834.262	792.767	926.148	4529.45	3957.3	4235.3	2548.46	2257.58	2422.15	2438.91	2258.67	2363.48
LMCD1	ENSG00000071282	792.5	925.944	958.326	382.296	331.197	387.028	568.281	482.229	597.474	571.225	550.165	632.256
BUD23	ENSG00000071462	1112.03	1201.73	1206.71	777.373	698.525	706.848	541.397	595.695	587.798	778.854	789.956	791.255
SEL1L	ENSG00000071537	2482.39	2498.89	2273.64	1789.47	2168.84	2203.98	2071.95	2107.92	2004.48	2056.8	2159.08	2072.6
TRIP13	ENSG00000071539	1670.47	1865.52	1705.48	204.511	208.755	209.737	266.99	224.975	261.244	709.644	714.538	686.502
ATP6AP1	ENSG00000071553	1100.37	1165.03	1274.08	1509.43	1422.14	1418.33	871.426	811.866	953.056	1095.66	1081.96	1144.79
TCF3	ENSG00000071564	2408.58	2363.62	2789.5	2353.04	2214	2082.31	2148.9	2433.64	2220.57	2216.66	2239.34	2283.98
TRIB2	ENSG00000071575	1652.01	1707.18	1712.52	1475.73	1423.14	1391.68	1654.78	1428.1	1560.21	1545.04	1452.28	1508.62
DAZAP1	ENSG00000071626	2748.5	2827.12	3047.94	1368.83	1252.53	1215.55	1199.6	1384.09	1210.27	1722.45	1726.88	1739.64
MBD3	ENSG00000071655	1583.06	1587.63	1873.41	1194.53	1230.45	1129.8	1020.68	1048.58	973.214	1221.41	1228.93	1260.77
PRLH	ENSG00000071677	0	0	0	0	0	0	0	0	0	0	0	0
HLTF	ENSG00000071794	1001.31	993.056	831.622	641.42	743.688	711.483	931.684	851.971	859.524	841.24	824.764	781.902
FAM50A	ENSG00000071859	1171.27	1263.6	1382.69	1031.85	846.058	908.474	742.566	961.524	762.767	940.669	976.567	968.024
FAM3A	ENSG00000071889	287.476	318.785	335.867	356.732	305.103	323.296	183.556	281.708	245.118	260.268	289.102	286.199
CPSF1	ENSG00000071894	1314.04	1245.78	1475.2	1336.29	1135.1	1203.96	883.478	829.473	857.912	1122.95	1021.04	1112.99
MYO3B	ENSG00000071909	1.9424	3.1459	3.01677	3.48598	5.01814	5.79384	12.9787	11.7378	14.5135	5.84872	6.76829	8.4176
CYBRD1	ENSG00000071967	970.23	951.111	911.064	1586.12	1785.45	1815.79	1588.03	1422.23	1530.37	1324.73	1334.32	1362.72
CDH19	ENSG00000071991	0	0	1.00559	0	0	0	0	0.978152	0	0	0	0
PDCD2	ENSG00000071994	1138.25	1267.8	1140.34	636.772	596.155	629.211	664.694	785.456	777.281	791.526	840.234	823.055
SLC6A15	ENSG00000072041	194.24	212.873	150.838	29.0498	30.1088	47.5095	18.541	21.5194	24.9955	79.9325	82.1863	69.2114
RDH11	ENSG00000072042	1466.51	1465.99	1503.36	1284	1241.49	1297.82	1123.58	1280.4	1169.15	1243.83	1271.47	1267.32
PRKACA	ENSG00000072062	2143.44	2261.9	2476.77	2485.5	2216.01	2254.96	2371.39	3033.25	2426.99	2242.98	2406.61	2312.97
ADGRL1	ENSG00000072071	715.776	636.521	681.789	1041.15	1059.83	1015.08	743.493	761.003	763.574	791.526	787.055	780.031
SPP2	ENSG00000072080	0	0	0	0	0	0	0.927049	0	0	0	0	0
ACTN1	ENSG00000072110	16688.2	16290.5	17050.8	2877.09	2614.45	2651.26	2112.74	2223.34	2172.19	7128.61	6578.77	6839.77
ZFYVE26	ENSG00000072121	642.935	630.229	604.359	844.769	850.073	908.474	713.828	647.537	632.952	701.846	679.729	676.214
RPS6KA6	ENSG00000072133	82.5521	79.6962	67.3745	67.3956	90.3265	85.7488	114.027	87.0556	97.5633	86.756	82.1863	81.3702
EPN2	ENSG00000072134	564.268	538.998	558.102	672.794	698.525	670.927	730.514	818.714	741.803	632.636	659.424	640.673
PTPN18	ENSG00000072135	361.287	361.779	361.006	346.274	289.045	265.358	209.513	326.703	219.316	291.461	311.341	268.428
LIMS2	ENSG00000072163	214.636	213.921	230.28	211.483	152.551	172.656	127.006	151.614	153.199	175.461	164.373	176.77
ASIC4	ENSG00000072182	7.76961	14.6809	18.1006	58.0996	42.1524	48.6683	32.4467	27.3883	27.4145	30.2184	27.0731	28.994
SPEG	ENSG00000072195	199.096	159.392	225.252	2585.43	2283.25	2548.13	1794.77	1726.44	1727.92	1418.31	1350.76	1423.51
LNX1	ENSG00000072201	180.643	232.797	255.42	158.031	166.602	202.784	205.805	181.936	183.838	176.436	184.677	204.828
ALDH3A2	ENSG00000072210	633.223	598.77	610.393	519.411	506.832	521.446	599.801	527.224	574.898	567.325	520.191	551.821
TFRC	ENSG00000072274	7345.2	7684.39	6677.11	1184.07	1298.69	1365.03	1772.52	1270.62	1681.15	3409.8	3197.53	3087.39
SREBF1	ENSG00000072310	394.308	339.757	445.476	1058.58	960.472	987.27	637.81	614.28	647.465	651.157	614.947	653.767
TRPC5	ENSG00000072315	0.971202	0	0	0	2.00726	0	0.927049	0.978152	0	0.974786	0.966898	0
AFF4	ENSG00000072364	3844.02	3535.99	3307.38	2083.45	2657.61	2883.01	3275.26	2825.88	2855.94	3016.96	2871.69	2905.01
UBE2D1	ENSG00000072401	240.858	240.137	173.967	106.903	131.475	144.846	299.437	277.795	261.244	215.428	207.883	193.605
MPP5	ENSG00000072415	677.899	696.293	596.314	413.669	412.491	457.713	647.08	650.471	572.479	569.275	560.801	529.374
RHOBTB1	ENSG00000072422	541.93	530.609	507.822	458.987	531.923	501.746	487.628	514.508	521.681	480.57	503.754	493.833
SMC1A	ENSG00000072501	4024.66	3904.06	4044.48	1763.91	1903.88	1883	1874.49	2238.01	1756.94	2496.43	2548.74	2440.17
HSD17B10	ENSG00000072506	861.456	1043.39	1035.76	716.95	626.264	624.576	608.144	597.651	655.528	701.846	718.405	742.62
MARK2	ENSG00000072518	674.985	623.937	663.689	578.672	536.941	559.685	446.838	521.355	447.501	543.931	535.661	529.374
HMMR	ENSG00000072571	1334.43	1424.04	1089.05	125.495	187.678	196.991	261.428	334.528	283.82	573.174	608.179	500.38
CHFR	ENSG00000072609	638.079	647.007	653.633	718.112	638.307	640.799	564.573	550.7	564.416	612.166	584.973	592.973
TRHDE	ENSG00000072657	21.3664	19.924	14.0782	10.4579	11.0399	15.064	6.48934	9.78152	4.83785	12.6722	12.5697	10.2882
P4HA2	ENSG00000072682	1850.14	1990.31	2079.56	1957.96	1881.8	1854.03	1196.82	1031.95	1265.9	1585.98	1555.74	1633.02
FCGR2B	ENSG00000072694	0	0	0	0	0	0	0	0	0	0	0	0
NFATC3	ENSG00000072736	962.461	1068.56	994.528	725.084	789.855	797.232	838.979	888.162	848.236	818.82	875.043	851.113
TRNT1	ENSG00000072756	365.172	395.335	356.984	330.006	379.371	415.998	440.348	408.868	464.433	368.469	378.057	402.174
ACADVL	ENSG00000072778	1624.82	1685.15	1867.38	2945.65	2347.49	2575.94	1504.6	1638.41	1546.5	1894.98	1811.97	1869.64
STK10	ENSG00000072786	1015.88	976.278	1117.21	534.517	496.796	524.922	401.412	412.78	400.735	629.712	595.609	642.544
FBXW11	ENSG00000072803	1116.88	1138.82	1020.67	880.791	882.189	945.555	1194.04	881.315	1119.16	1038.15	923.387	1003.57
ACAP1	ENSG00000072818	42.7329	23.0699	37.2068	122.009	100.363	84.5901	86.2155	93.9026	79.8245	78.9577	70.5835	65.4703
CRMP1	ENSG00000072832	2689.26	2823.97	2804.59	3310.52	2912.53	2995.41	2783.93	2857.18	2914	2801.54	2745.02	2802.13
EVC	ENSG00000072840	403.049	372.265	381.118	515.925	579.093	592.13	529.345	562.438	482.172	464.973	485.383	463.904
DERL2	ENSG00000072849	828.435	925.944	837.656	656.526	673.434	669.768	701.776	632.865	649.078	706.72	709.703	691.179
SIDT1	ENSG00000072858	1.9424	3.1459	3.01677	6.97196	3.01088	5.79384	15.7598	4.89076	4.83785	7.79829	3.86759	4.67645
NDE1	ENSG00000072864	817.752	879.804	882.907	289.336	339.226	257.246	273.479	314.965	309.622	450.351	483.449	462.968
IRAG1	ENSG00000072952	106.832	99.6202	96.5366	391.592	409.48	429.903	526.564	537.984	491.848	329.478	339.381	335.769
TMEM38A	ENSG00000072954	68.9553	54.529	53.2962	1295.62	1018.68	1009.29	758.326	602.542	790.988	651.157	542.43	593.909
AP1M1	ENSG00000072958	1867.62	1905.37	2012.18	1067.87	978.537	913.109	829.709	669.056	827.272	1214.58	1120.63	1189.69
PVR	ENSG00000073008	1907.44	1771.14	1901.57	664.66	640.315	658.18	416.245	439.19	384.609	969.912	894.381	915.648
XRCC1	ENSG00000073050	519.593	538.998	599.331	514.763	440.593	409.045	428.297	584.935	437.019	467.897	499.886	464.839
SCARB1	ENSG00000073060	776.961	864.074	916.092	1252.63	1218.4	1266.53	1176.42	1162.05	1183.66	1022.55	1039.42	1082.13
CYP2W1	ENSG00000073067	2.9136	1.04863	2.01118	19.7539	21.0762	25.4929	26.8844	7.82522	18.5451	15.5966	9.66898	14.9646
MCM2	ENSG00000073111	2981.59	3011.68	3187.72	625.152	568.053	587.495	678.6	688.619	686.974	1410.52	1335.29	1412.29
MOV10L1	ENSG00000073146	1.9424	5.24317	0	0	1.00363	0	0	0	0.806308	0.974786	1.9338	0
PANX2	ENSG00000073150	25.2512	36.7022	21.1174	5.80996	12.0435	4.63507	6.48934	8.80337	7.25677	12.6722	18.3711	10.2882
SELENOO	ENSG00000073169	178.701	135.274	204.135	259.124	208.755	193.514	146.474	114.444	165.293	183.26	146.002	179.576
TP63	ENSG00000073282	35.9345	38.7995	38.2124	304.442	306.107	295.486	359.695	424.518	362.839	223.226	250.427	231.952
ALPK1	ENSG00000073331	99.0626	83.8907	88.4918	162.679	169.613	194.673	177.066	154.548	174.163	140.369	131.498	146.84
LLGL2	ENSG00000073350	12.6256	16.7781	13.0727	24.4019	30.1088	20.8578	12.9787	6.84707	9.67569	15.5966	17.4042	13.0941
PDE8A	ENSG00000073417	426.357	396.384	416.314	352.084	378.368	374.282	431.078	431.365	412.83	391.864	385.792	389.08
CLCN4	ENSG00000073464	251.541	284.18	251.397	622.828	672.431	752.04	593.311	503.748	591.83	465.948	468.945	508.797
NLE1	ENSG00000073536	485.601	514.879	491.733	298.632	229.831	268.834	266.063	223.997	261.244	339.226	305.54	325.481
SDHA	ENSG00000073578	1212.06	1225.85	1455.09	1214.28	1086.93	1081.13	1071.67	1044.67	1064.33	1121	1070.36	1153.21
SMARCE1	ENSG00000073584	2426.06	2636.27	2677.88	1907.99	2122.67	1929.35	2496.54	3606.45	2605.18	2220.56	2680.24	2356.93
FNDC8	ENSG00000073598	29.136	33.5563	31.1733	20.9159	15.0544	30.128	17.6139	20.5412	17.7388	21.4453	22.2387	24.3175
GSDMB	ENSG00000073605	75.7537	71.3071	91.5086	324.196	307.11	322.137	203.951	223.997	201.577	187.159	194.346	192.67
KDM5A	ENSG00000073614	1227.6	1308.7	1308.27	1024.88	1205.36	1358.08	1374.81	1180.63	1094.97	1179.49	1178.65	1194.36
ADAM11	ENSG00000073670	30.1072	29.3618	31.1733	149.897	139.504	140.211	77.8721	50.8639	66.9236	78.9577	70.5835	72.9526
PPP2R3A	ENSG00000073711	482.687	516.977	421.342	456.663	509.843	543.462	793.554	791.325	800.664	567.325	583.039	586.426
FERMT2	ENSG00000073712	5058.99	5412	5115.43	2403	2679.69	2530.75	2995.29	3179	3017.2	3414.68	3571.72	3433.45
ABCB11	ENSG00000073734	0.971202	1.04863	0	6.97196	7.0254	6.95261	6.48934	7.82522	9.67569	4.87393	4.83449	5.61174
DHRS9	ENSG00000073737	0.971202	0	0	3.48598	0	0	0.927049	0	0	1.94957	0	0
CD5L	ENSG00000073754	0	0	0	0	0	0	0	0	0	0	0	0
PTGS2	ENSG00000073756	83.5233	57.6749	80.4471	12.7819	12.0435	12.7464	23.1762	9.78152	12.9009	39.9662	25.1393	33.6704
IGF2BP2	ENSG00000073792	3977.07	3939.72	4022.36	2206.62	2230.06	2231.79	2121.09	2909.03	2179.45	2691.38	2885.22	2689.89
MAP3K13	ENSG00000073803	404.02	385.897	362.012	345.112	385.393	381.235	437.567	512.552	438.632	385.04	410.932	384.404
ST6GAL1	ENSG00000073849	163.162	164.636	151.844	271.906	281.016	296.645	220.638	265.079	234.636	207.629	228.188	217.922
TBX21	ENSG00000073861	0	1.04863	0	1.16199	0	0	0	0.978152	0	0	0.966898	0
VDAC1P1	ENSG00000073905	3.88481	2.09727	5.02795	0	2.00726	1.15877	1.8541	1.9563	4.03154	1.94957	1.9338	3.74116
FRY	ENSG00000073910	263.196	281.034	276.537	693.71	747.703	852.853	549.74	506.683	486.204	474.721	493.118	503.186
PICALM	ENSG00000073921	4779.28	4885.59	4013.31	1402.53	1705.16	1640.82	2060.83	1965.11	2068.18	2713.8	2696.68	2485.06
NSF	ENSG00000073969	900.304	883.998	844.695	690.224	644.329	731.183	683.235	730.68	623.276	734.014	719.372	699.596
GLI2	ENSG00000074047	470.062	376.46	421.342	268.42	283.023	273.469	215.075	249.429	203.996	308.032	289.102	283.393
CLASP1	ENSG00000074054	1735.54	1647.4	1712.52	2335.61	2303.33	2670.96	2556.8	2417.99	2314.1	2129.91	2043.06	2144.62
MRPS34	ENSG00000074071	829.406	839.956	945.254	583.32	507.836	426.427	438.494	753.177	536.195	594.619	669.093	615.42
NOTCH3	ENSG00000074181	1969.6	1730.25	2142.91	3974.02	4047.63	4201.69	3077.8	3044.01	2927.7	2849.3	2834.94	2926.52
CLNS1A	ENSG00000074201	1307.24	1529.96	1460.12	798.289	816.953	761.31	1080.94	1150.31	1190.92	1039.12	1111.93	1117.67
PPP2R2C	ENSG00000074211	34.9633	30.4104	28.1565	38.3458	34.1233	34.763	58.4041	60.6454	71.7614	42.8906	40.6097	45.8292
TEAD2	ENSG00000074219	1127.56	1165.03	1304.25	1288.65	1193.31	1186.58	1131	1262.79	1163.5	1133.68	1157.38	1173.79
EED	ENSG00000074266	458.407	447.767	414.303	255.638	222.805	207.419	284.604	211.281	247.537	324.604	278.467	279.652
CDHR2	ENSG00000074276	47.5889	36.7022	54.3018	39.5078	46.1669	40.5569	35.2279	42.0606	33.0586	38.9914	39.6428	40.2174
SNCB	ENSG00000074317	1.9424	2.09727	4.02236	2.32399	2.00726	4.63507	3.7082	7.82522	4.83785	2.92436	3.86759	4.67645
TSG101	ENSG00000074319	781.817	893.436	924.136	815.719	898.247	758.993	854.739	1037.82	905.484	789.577	905.016	840.825
NCBP3	ENSG00000074356	747.825	736.141	710.951	697.196	799.891	796.074	714.755	749.265	661.172	695.997	730.008	690.244
ATP2A3	ENSG00000074370	21.3664	11.535	27.1509	36.0218	18.0653	24.3341	20.3951	22.4975	18.5451	24.3697	16.4373	22.4469
CA12	ENSG00000074410	279.706	286.277	308.716	96.4454	84.3047	86.9076	108.465	86.0774	103.207	158.89	143.101	158.999
MGLL	ENSG00000074416	1321.81	1284.58	1457.1	340.464	355.284	292.01	287.385	262.145	270.113	638.485	595.609	635.061
NTN4	ENSG00000074527	700.236	697.342	576.203	132.467	112.406	92.7014	102.902	103.684	80.6308	307.058	284.268	234.758
BCS1L	ENSG00000074582	583.692	620.791	600.337	461.311	359.299	367.329	247.522	265.079	287.046	411.36	393.527	395.627
NUAK1	ENSG00000074590	1453.89	1523.67	1518.44	1177.1	1052.81	1127.48	859.374	741.44	790.182	1117.1	1051.02	1079.32
DPP8	ENSG00000074603	890.592	909.166	734.08	587.968	663.398	654.704	833.417	698.401	738.578	754.484	722.273	689.308
SLC24A1	ENSG00000074621	225.319	221.262	250.392	161.517	192.697	170.339	145.547	181.936	154.811	171.562	189.512	183.317
ZNF532	ENSG00000074657	1385.9	1423	1448.05	1576.82	1633.91	1636.18	1869.86	2176.39	1717.44	1559.66	1679.5	1553.52
SCARF1	ENSG00000074660	4.85601	11.535	5.02795	25.5638	13.0472	10.4289	3.7082	1.9563	7.25677	9.74786	8.70208	7.48231
LMAN1	ENSG00000074695	4347.1	4310.93	3798.11	2225.22	2780.05	2811.17	2904.44	2734.91	2668.07	3094.95	3119.21	2965.8
HACD3	ENSG00000074696	3678.91	3898.82	3504.48	1760.42	1870.76	1725.41	1810.53	1901.53	1839.19	2358.01	2425.95	2261.53
IPCEF1	ENSG00000074706	0	3.1459	1.00559	3.48598	2.00726	6.95261	7.41639	3.91261	5.64416	3.89914	2.90069	4.67645
ZZEF1	ENSG00000074755	1190.69	1169.23	1070.95	1192.2	1207.36	1271.17	991.942	804.041	815.984	1079.09	1012.34	989.536
NOX3	ENSG00000074771	0	0	0	0	0	0	0	0	0	0	0	0
ENO1	ENSG00000074800	34084.3	37739.3	38103.8	7335.66	5945.49	6258.51	10777.9	8129.42	11177	17232.3	16186.8	17819.1
SLC12A1	ENSG00000074803	2.9136	1.04863	0	5.80996	1.00363	8.11138	9.27049	3.91261	6.45046	5.84872	1.9338	4.67645
MYDGF	ENSG00000074842	1309.18	1490.11	1508.38	696.034	612.213	633.846	494.117	471.469	549.096	806.148	810.26	850.178
ANO8	ENSG00000074855	137.911	141.566	157.877	362.542	318.15	340.678	181.702	155.526	177.388	211.529	197.247	209.505
TUBE1	ENSG00000074935	203.952	213.921	188.045	238.209	223.809	276.946	292.02	252.363	220.928	236.873	220.453	217.922
ARHGEF10L	ENSG00000074964	196.183	217.067	214.19	429.937	363.313	387.028	278.115	204.434	277.37	283.663	250.427	277.781
TXK	ENSG00000074966	0.971202	2.09727	3.01677	10.4579	17.0617	17.3815	37.082	19.563	18.5451	16.5714	12.5697	13.0941
WSCD2	ENSG00000075035	16.5104	14.6809	15.0838	41.8317	30.1088	22.0166	59.3311	81.1866	70.1488	38.0167	40.6097	37.4116
KCNQ2	ENSG00000075043	123.343	127.933	127.71	125.495	120.435	133.258	115.881	127.16	132.234	116.974	119.895	126.264
TACR2	ENSG00000075073	9.71202	7.34044	8.04471	3.48598	6.02177	9.27014	11.1246	7.82522	12.9009	7.79829	6.76829	10.2882
ACTR6	ENSG00000075089	279.706	242.234	221.23	149.897	164.595	190.038	317.051	292.468	268.501	246.621	223.353	223.534
TIPIN	ENSG00000075131	537.074	611.354	510.839	74.3675	101.366	100.813	101.048	156.504	138.685	235.898	271.698	239.434
SRI	ENSG00000075142	1174.18	1346.45	1374.64	670.47	579.093	629.211	659.132	623.083	725.677	811.022	805.426	876.366
EIF4G3	ENSG00000075151	2046.32	2043.79	2070.51	2715.58	2661.62	2898.08	2371.39	2884.57	2282.66	2275.15	2433.68	2304.55
NUP37	ENSG00000075188	575.923	590.381	558.102	185.919	177.642	154.116	226.2	186.827	188.676	323.629	299.738	287.134
SEMA3A	ENSG00000075213	1039.19	1033.95	892.963	290.498	389.408	375.441	586.822	672.969	529.744	634.586	664.259	582.685
GTSE1	ENSG00000075218	1359.68	1367.42	1374.64	298.632	293.059	269.993	298.51	268.014	304.784	643.359	602.377	616.356
SEMA3C	ENSG00000075223	2817.46	2735.89	2590.4	1335.13	1564.66	1734.68	1750.27	1575.8	1597.3	1929.1	1862.25	1887.41
TTC38	ENSG00000075234	257.368	246.429	286.593	357.894	343.241	337.201	297.583	242.582	275.757	290.486	265.897	286.199
ACAT1	ENSG00000075239	882.822	914.409	891.958	967.94	895.236	857.488	940.027	1060.32	1013.53	895.828	917.586	898.813
GRAMD4	ENSG00000075240	237.944	229.651	265.476	201.025	171.62	183.085	172.431	148.679	162.068	195.932	175.009	194.54
CELSR1	ENSG00000075275	415.674	370.168	387.152	558.919	518.876	552.732	373.601	346.266	362.839	425.982	394.494	408.721
WNT8B	ENSG00000075290	0	0	0	3.48598	3.01088	2.31754	0	0	0	0.974786	0.966898	0.935289
ZNF638	ENSG00000075292	1890.93	1870.76	1774.86	2277.51	2286.26	2611.86	2376.03	2668.4	2382.64	2102.61	2188.09	2174.55
SLC25A40	ENSG00000075303	285.533	246.429	222.235	105.741	139.504	129.782	231.762	185.849	184.645	206.655	181.777	174.899
TIMM21	ENSG00000075336	738.113	806.399	737.097	533.355	452.636	440.332	521.001	561.459	512.006	579.023	578.205	545.274
ADD2	ENSG00000075340	684.697	652.25	697.879	417.155	415.502	440.332	379.163	416.693	365.257	478.62	470.879	476.062
FGF4	ENSG00000075388	0	0	0	73.2056	84.3047	77.6374	142.766	115.422	155.617	70.1846	64.7822	81.3702
RASAL2	ENSG00000075391	1100.37	1048.63	917.097	1171.29	1325.79	1475.11	1542.61	1432.02	1282.84	1236.03	1220.23	1177.53
VPS9D1	ENSG00000075399	178.701	178.268	180	342.788	275.998	276.946	154.817	184.871	194.32	209.579	204.015	205.764
ZNF37A	ENSG00000075407	238.916	269.499	242.347	221.941	206.747	253.77	292.947	345.288	254.793	244.671	262.996	242.24
MARK3	ENSG00000075413	1495.65	1527.86	1501.34	1323.51	1261.56	1305.93	1281.18	1213.89	1287.67	1319.86	1274.37	1315.02
SLC25A3	ENSG00000075415	6942.15	7791.35	7447.39	8737.03	7400.75	7491.43	8306.36	6615.24	8551.7	7677.42	6951.03	7631.03
FNDC3B	ENSG00000075420	3458.45	3189.94	3105.26	1861.51	2008.26	2091.58	2200.81	2332.89	2195.58	2448.66	2394.04	2374.7
FOSL2	ENSG00000075426	2073.52	2130.82	2201.23	1157.34	1077.9	1093.88	1029.02	1016.3	1016.75	1378.35	1336.25	1370.2
CACNG5	ENSG00000075429	2.9136	1.04863	3.01677	0	7.0254	9.27014	11.1246	11.7378	8.86939	4.87393	6.76829	6.54703
CACNG4	ENSG00000075461	651.676	684.758	730.058	825.015	780.822	685.991	687.87	740.461	720.839	690.149	704.869	689.308
FRYL	ENSG00000075539	1470.4	1387.34	1276.09	700.682	791.862	884.14	953.006	902.835	864.362	1021.58	978.501	968.024
TMEM131	ENSG00000075568	1449.03	1351.69	1315.31	1631.44	1788.46	2005.83	1691.86	1935.76	1547.3	1534.31	1627.29	1546.03
FSCN1	ENSG00000075618	5793.22	5736.03	6315.1	4191.31	3595	3462.4	3262.28	3289.53	3499.38	4253.97	4001.02	4242.47
ACTB	ENSG00000075624	140707	141948	149548	33119.1	30337.7	28605.3	28183.2	33309	30782.4	66214.3	64346.1	65963.2
MOCOS	ENSG00000075643	17.4816	19.924	30.1677	3.48598	11.0399	6.95261	3.7082	3.91261	4.83785	7.79829	10.6359	13.0941
PLD1	ENSG00000075651	47.5889	53.4803	52.2906	670.47	686.481	756.675	471.868	452.885	446.695	368.469	385.792	392.822
ATP12A	ENSG00000075673	0	0	0	0	0	2.31754	0	0	0	0	0	0.935289
WDR62	ENSG00000075702	621.569	576.749	617.432	187.081	158.573	151.799	114.027	123.247	98.3696	300.234	268.798	270.299
DLG1	ENSG00000075711	1272.27	1275.14	1149.39	835.473	925.345	903.839	1106.9	1163.02	985.308	1046.92	1072.29	980.183
RAB7A	ENSG00000075785	3743.01	4037.24	4082.69	2203.14	2040.38	2027.84	2163.73	2885.55	2372.96	2627.05	2846.55	2729.17
BCAP29	ENSG00000075790	604.087	619.743	531.957	415.993	484.752	460.031	566.427	662.209	557.159	516.637	564.668	504.121
SEC31B	ENSG00000075826	25.2512	29.3618	43.2403	471.769	428.549	500.588	234.543	216.172	220.928	222.251	217.552	233.822
SART3	ENSG00000075856	1314.04	1332.81	1412.85	1042.31	919.323	972.206	962.277	1057.38	972.407	1068.37	1052.95	1075.58
ARHGAP15	ENSG00000075884	0	0	0	3.48598	0	2.31754	3.7082	3.91261	4.03154	1.94957	0.966898	1.87058
TUBA3D	ENSG00000075886	11.6544	12.5836	10.0559	6.97196	5.01814	8.11138	10.1975	8.80337	8.06308	9.74786	8.70208	8.4176
PAX2	ENSG00000075891	67.0129	65.0153	67.3745	73.2056	72.2612	70.6848	55.6229	62.6018	59.6668	62.3863	63.8153	62.6644
EXOSC7	ENSG00000075914	456.465	467.691	483.688	556.595	498.803	492.476	576.624	502.77	575.704	510.788	469.912	505.056
KIFAP3	ENSG00000075945	700.236	724.606	687.823	637.934	652.358	662.815	821.365	722.855	775.668	700.871	670.06	691.179
MKRN2	ENSG00000075975	982.856	1044.44	902.013	622.828	629.275	632.687	619.269	647.537	692.618	720.367	736.776	717.367
MCM6	ENSG00000076003	2858.25	3352.48	3207.83	865.685	777.812	752.04	1003.99	822.626	919.191	1549.91	1550.9	1552.58
REXO2	ENSG00000076043	1163.5	1202.78	1259	404.374	389.408	381.235	380.09	405.933	400.735	635.561	628.484	648.156
RBM7	ENSG00000076053	406.933	379.605	384.135	250.99	271.983	298.962	462.597	426.474	393.478	368.469	344.216	351.669
RBMS2	ENSG00000076067	1066.38	1024.52	1063.91	782.021	812.939	830.837	861.228	872.512	817.596	877.307	863.44	869.819
BAZ2A	ENSG00000076108	1348.03	1376.86	1505.37	1717.43	1682.08	1785.66	1501.82	1511.25	1323.96	1457.31	1460.98	1459.05
PTPN23	ENSG00000076201	1237.31	1080.09	1287.15	998.152	979.541	991.905	693.433	829.473	604.731	935.795	919.52	899.748
MLH1	ENSG00000076242	1103.28	1376.86	1387.71	655.364	604.184	577.066	642.445	674.925	673.267	777.879	839.267	845.502
UNG	ENSG00000076248	800.27	799.059	819.555	414.831	349.263	361.536	402.339	344.31	401.541	524.435	470.879	506.927
FMO4	ENSG00000076258	24.28	14.6809	20.1118	80.1775	55.1995	86.9076	58.4041	60.6454	61.2794	50.6889	42.5435	53.3115
KLHL20	ENSG00000076321	331.18	326.125	304.693	355.57	427.545	441.491	441.275	443.103	412.023	364.57	383.858	372.245
RGS11	ENSG00000076344	6.79841	9.43771	10.0559	51.1277	34.1233	38.2393	16.6869	20.5412	16.9325	22.4201	20.3049	19.6411
SLC46A1	ENSG00000076351	294.274	310.396	309.721	534.517	488.767	484.365	409.756	344.31	359.613	391.864	365.487	365.698
PLXNA2	ENSG00000076356	2736.85	2692.89	2696.99	2305.39	2360.53	2456.59	2034.87	1834.04	1855.31	2273.2	2190.02	2214.77
SPAG5	ENSG00000076382	2145.38	2262.95	2322.91	554.271	530.919	463.507	482.992	605.476	503.942	1042.05	1065.52	1040.04
ANKRD13A	ENSG00000076513	856.6	846.248	796.427	845.931	944.414	955.983	885.332	1043.69	954.669	833.442	906.95	873.56
TPD52	ENSG00000076554	55.3585	39.8481	52.2906	31.3738	31.1125	34.763	100.121	98.7934	83.0497	62.3863	55.1132	57.9879
ACACB	ENSG00000076555	122.371	108.009	131.732	275.392	285.03	265.358	328.175	277.795	284.627	232.974	216.585	222.599
TRAF4	ENSG00000076604	830.377	806.399	903.019	1199.18	1115.03	1115.89	969.693	854.905	1019.98	953.341	887.612	974.571
PAG1	ENSG00000076641	370.999	316.687	311.733	543.813	613.217	615.306	660.059	564.394	565.222	507.864	480.548	480.739
GPATCH1	ENSG00000076650	191.327	210.775	227.263	221.941	245.889	199.308	241.033	269.97	236.248	210.554	233.022	215.117
ICAM3	ENSG00000076662	100.034	98.5716	105.587	73.2056	86.312	69.5261	49.1336	79.2303	61.2794	71.1594	84.1201	74.8231
NT5C2	ENSG00000076685	1236.34	1335.96	1269.05	1784.82	1891.84	1935.14	1767.88	1872.18	1802.9	1532.36	1635.02	1611.5
MCAM	ENSG00000076706	981.885	1095.82	1105.14	1314.21	1244.5	1272.33	829.709	1053.47	906.29	986.483	1083.89	1035.37
GPC4	ENSG00000076716	1636.47	1707.18	1684.36	2865.47	3025.94	3164.6	2076.59	2025.75	2095.59	2076.29	2163.92	2183.9
MBNL3	ENSG00000076770	285.533	311.444	233.297	105.741	144.522	185.403	273.479	326.703	283.014	221.276	249.46	231.952
CAMSAP3	ENSG00000076826	60.2145	42.994	72.4024	90.6355	87.3156	85.7488	40.7901	49.8858	61.2794	59.4619	58.0139	69.2114
RAP1GAP	ENSG00000076864	33.9921	27.2645	44.2459	27.8878	34.1233	30.128	39.8631	45.9732	37.0902	33.1427	34.8083	36.4763
XAB2	ENSG00000076924	778.904	715.168	844.695	647.23	537.945	529.557	425.515	481.251	467.659	590.72	551.132	585.491
ARHGEF1	ENSG00000076928	961.49	909.166	1028.72	651.878	585.115	631.528	421.807	338.441	389.447	652.132	579.172	639.738
STXBP2	ENSG00000076944	18.4528	11.535	23.1285	9.29594	9.03265	15.064	10.1975	5.86891	6.45046	12.6722	8.70208	14.0293
MAP2K7	ENSG00000076984	462.292	496.004	525.923	626.314	574.075	587.495	460.743	513.53	491.848	491.292	505.688	511.603
NMRK2	ENSG00000077009	5.82721	11.535	9.0503	127.819	113.41	89.2251	97.3401	80.2085	91.1128	72.1342	66.716	61.7291
DGKD	ENSG00000077044	535.132	513.831	541.007	960.968	878.174	988.429	857.52	671.013	794.213	748.636	661.358	740.749
CTTNBP2	ENSG00000077063	44.6753	26.2158	29.1621	32.5358	43.156	50.9858	46.3524	38.1479	43.5406	39.9662	34.8083	39.2822
ACTL6B	ENSG00000077080	51.4737	47.1885	63.3521	58.0996	57.2068	56.7796	39.8631	45.9732	24.9955	47.7645	48.3449	44.8939
RARB	ENSG00000077092	149.565	124.787	150.838	350.922	453.64	455.396	514.512	498.858	464.433	328.503	348.083	348.863
TOP2B	ENSG00000077097	4346.13	4352.88	4054.54	2828.29	2917.55	3081.16	3560.79	4188.45	3563.88	3492.66	3654.87	3464.31
TM9SF3	ENSG00000077147	4484.04	4115.89	3379.78	2215.92	2780.05	2813.49	3337.38	2791.65	3001.88	3289.9	3077.64	2965.8
NFKB2	ENSG00000077150	379.74	319.833	381.118	339.302	301.088	303.597	236.397	284.642	248.343	305.108	289.102	295.551
UBE2T	ENSG00000077152	764.336	834.713	851.734	198.701	177.642	173.815	187.264	185.849	205.609	377.242	375.156	390.016
PPP1R12B	ENSG00000077157	237.944	222.31	202.123	1109.7	1315.76	1422.97	1435.07	1300.94	1214.3	892.904	919.52	914.713
DNAJC10	ENSG00000077232	2770.84	3014.82	2395.31	1444.36	1652.98	1771.76	1692.79	1498.53	1628.74	1924.23	1951.2	1849.07
GTF3C1	ENSG00000077235	2567.86	2598.51	2633.64	2529.66	2411.72	2555.08	2065.46	2038.47	1905.31	2290.75	2245.14	2240.95
IL4R	ENSG00000077238	608.943	575.7	685.812	163.841	147.533	150.64	96.4131	97.8152	100.788	283.663	256.228	291.81
USP33	ENSG00000077254	1094.54	1059.12	865.812	682.09	827.993	847.059	1058.69	902.835	890.164	927.996	888.579	840.825
PAK3	ENSG00000077264	272.908	219.164	214.19	313.738	376.36	385.87	436.64	402.021	395.897	332.402	321.01	323.61
CAPN6	ENSG00000077274	462.292	460.35	513.856	2507.58	2390.64	2505.26	2817.3	3520.37	2767.25	1843.32	2069.16	1903.31
DCX	ENSG00000077279	1576.26	1592.87	1394.75	3628.9	4135.95	4105.51	5366.69	4982.71	4776.57	3423.45	3459.56	3383.88
SNRPA	ENSG00000077312	1499.54	1732.34	1847.27	691.386	632.286	564.32	632.247	856.862	690.2	916.299	1018.14	991.407
SPAG6	ENSG00000077327	0	0	1.00559	61.5856	70.254	70.6848	145.547	119.335	141.91	68.235	61.8815	73.8879
EXOSC5	ENSG00000077348	173.845	176.171	203.129	110.389	75.2721	79.955	78.7991	75.3177	83.0497	116.974	103.458	116.911
DYNC1I2	ENSG00000077380	2329.91	2514.62	2485.82	1813.87	1735.27	1727.72	1832.78	2064.88	2107.69	1929.1	2010.18	2050.15
APBB1IP	ENSG00000077420	0	0	0	0	2.00726	1.15877	2.78115	1.9563	0.806308	0.974786	0.966898	0.935289
LRCH4	ENSG00000077454	436.069	408.967	508.828	737.866	618.235	675.562	426.442	508.639	420.086	502.015	492.151	502.25
FAM76B	ENSG00000077458	236.002	243.283	190.056	175.461	202.733	193.514	277.188	268.014	238.667	225.176	228.188	202.958
SIRT6	ENSG00000077463	211.722	184.56	220.224	246.343	160.58	161.069	124.225	118.356	145.942	183.26	146.968	168.352
TYR	ENSG00000077498	0.971202	0	0	0	0	0	0	0	0	0	0	0
POLD3	ENSG00000077514	744.912	842.053	784.359	269.582	262.951	268.834	336.519	422.562	328.167	442.553	482.482	442.392
ACTN2	ENSG00000077522	594.375	561.019	623.465	16994.1	14971.1	15687.4	13125.2	13838.9	13470.2	9550.95	9540.38	9622.26
CAPZB	ENSG00000077549	4358.75	4640.21	4807.72	3275.66	3027.95	2842.46	2768.17	3355.06	2851.1	3344.49	3504.04	3357.69
GPR137B	ENSG00000077585	104.89	88.0853	102.57	69.7196	92.3338	78.7962	96.4131	105.64	82.2434	88.7055	91.8553	85.1113
NAALAD2	ENSG00000077616	30.1072	31.459	25.1397	87.1495	96.3483	123.988	140.911	133.029	99.1759	83.8316	84.1201	79.4996
JADE1	ENSG00000077684	1039.19	974.181	904.025	497.333	580.097	582.86	597.019	603.52	602.312	695.997	684.564	669.667
SLC25A43	ENSG00000077713	249.599	229.651	214.19	126.657	140.508	100.813	104.757	106.619	108.852	155.966	150.836	135.617
UBE2A	ENSG00000077721	1026.56	1131.48	976.427	517.087	592.14	555.05	620.196	786.435	666.817	705.745	796.724	709.885
FGFR1	ENSG00000077782	2936.91	2964.49	3293.3	4068.14	3956.3	3949.08	2798.76	3109.55	2889.81	3100.79	3206.23	3200.56
FKBP6	ENSG00000077800	0.971202	0	0	0	0	1.15877	0	0	0	0	0	0
SMC1B	ENSG00000077935	5.82721	4.19454	2.01118	5.80996	5.01814	4.63507	0.927049	0	3.22523	3.89914	2.90069	2.80587
FBLN1	ENSG00000077942	3073.85	3091.37	3565.82	10263.9	9342.77	9163.54	6714.61	7280.39	6822.17	6252.28	6349.62	6208.45
ITGA8	ENSG00000077943	89.3505	76.5503	72.4024	138.277	144.522	158.751	225.273	225.953	194.32	147.193	144.068	140.293
CST7	ENSG00000077984	2.9136	0	0	2.32399	0	0	0	0	0	1.94957	0	0
MAP2	ENSG00000078018	2519.3	2542.94	2129.84	2155.5	2365.55	2606.07	2983.24	3029.34	2543.9	2491.55	2539.07	2344.77
PIAS2	ENSG00000078043	520.564	544.241	474.638	508.953	551.995	584.019	693.433	579.066	626.501	559.527	535.661	546.209
AMPH	ENSG00000078053	272.908	293.618	251.397	491.523	427.545	484.365	327.248	339.419	323.329	343.125	339.381	332.963
ARAF	ENSG00000078061	624.483	639.667	743.13	691.386	578.09	568.955	414.391	473.426	430.568	547.83	538.562	549.95
MCCC1	ENSG00000078070	168.018	185.608	185.028	410.184	353.277	369.647	355.987	383.436	374.127	295.36	296.838	301.163
LAMP3	ENSG00000078081	6.79841	6.2918	10.0559	5.80996	16.058	13.9052	8.34344	20.5412	4.03154	6.8235	13.5366	8.4176
FAP	ENSG00000078098	378.769	451.961	423.353	1209.63	1368.95	1315.2	1089.28	1140.53	1107.06	847.089	954.328	912.842
NEBL	ENSG00000078114	389.452	407.919	297.654	1130.62	1371.96	1363.87	1445.27	1132.7	1400.56	953.341	938.858	1000.76
ACER3	ENSG00000078124	548.729	552.63	423.353	267.258	340.23	345.313	403.266	417.671	411.217	399.662	416.733	383.469
UBE2K	ENSG00000078140	2099.74	2056.37	1863.36	911.002	1067.86	1060.27	1430.44	1339.09	1332.83	1458.28	1416.51	1378.62
PIK3C3	ENSG00000078142	629.339	671.126	537.99	762.267	742.685	807.661	925.195	851.971	910.322	747.661	725.173	736.073
N4BP2	ENSG00000078177	592.433	537.949	471.621	363.704	430.556	509.858	618.342	586.891	584.573	516.637	496.986	509.733
TIGAR	ENSG00000078237	405.962	461.399	371.062	174.299	184.668	199.308	266.99	221.062	242.699	277.814	273.632	262.816
TULP3	ENSG00000078246	678.87	701.536	658.661	617.018	599.166	585.178	639.664	820.67	614.407	623.863	678.762	599.52
SYNJ2	ENSG00000078269	1740.39	1478.57	1560.67	603.074	599.166	606.036	562.719	548.743	598.28	948.467	827.665	878.237
ADCY2	ENSG00000078295	146.651	137.371	147.822	513.601	440.593	465.825	472.795	518.421	453.145	358.721	354.852	346.057
PPP2R5C	ENSG00000078304	1524.79	1753.32	1548.61	1139.92	1205.36	1125.16	1675.18	1512.22	1616.65	1416.36	1424.24	1407.61
PMS2P1	ENSG00000078319	94.2065	85.988	75.4192	63.9096	79.2866	68.3673	49.1336	83.143	60.4731	66.2855	79.2856	65.4703
RBFOX1	ENSG00000078328	187.442	184.56	149.833	819.205	872.153	831.995	1258.93	1350.83	1291.71	733.039	782.22	769.743
GNB1	ENSG00000078369	9513.89	9973.56	9896	4592.2	4359.76	4292.08	4681.6	4790.01	4613.69	6108.01	6044.08	6006.43
HOXA9	ENSG00000078399	360.316	406.87	339.889	362.542	362.31	330.249	316.124	440.169	374.933	332.402	386.759	339.51
EDN1	ENSG00000078401	140.824	167.781	125.699	10.4579	3.01088	11.5877	10.1975	3.91261	9.67569	53.6132	54.1463	45.8292
MLLT10	ENSG00000078403	555.527	534.803	462.571	601.912	575.079	608.353	732.369	898.922	663.591	611.191	644.921	563.979
ZCWPW1	ENSG00000078487	63.1281	55.5776	55.3074	83.6635	72.2612	82.2725	73.2369	57.711	74.9866	70.1846	58.9808	68.2761
ADCYAP1R1	ENSG00000078549	85.4657	75.5016	83.4639	673.956	763.761	742.77	1143.98	923.376	1002.24	618.014	572.404	613.55
FGF20	ENSG00000078579	0	1.04863	0	0	0	0	0	0.978152	0.806308	0	0.966898	0
P2RY10	ENSG00000078589	0.971202	0	0	0	0	0	0	1.9563	0	0	0.966898	0
ITM2A	ENSG00000078596	359.345	404.773	379.107	511.277	511.85	504.064	373.601	299.315	361.226	393.814	387.726	392.822
NRDC	ENSG00000078618	3581.79	4070.8	3658.33	3239.64	3210.61	3527.29	2954.5	3279.74	3078.48	3139.79	3362.87	3273.51
VDAC3	ENSG00000078668	2112.36	2503.09	2298.78	1614.01	1382	1486.7	1824.43	1494.62	1952.88	1797.51	1705.61	1867.77
PCM1	ENSG00000078674	3239.93	3283.27	3004.7	2470.4	2635.53	3120.56	3064.82	3588.84	3127.67	2849.3	3037.99	2980.77
TNRC6C	ENSG00000078687	402.077	375.411	421.342	798.289	839.033	855.171	775.94	854.905	760.348	629.712	666.193	654.703
CBFA2T2	ENSG00000078699	379.74	331.368	379.107	690.224	672.431	665.133	587.749	579.066	548.289	526.384	508.588	508.797
BRINP1	ENSG00000078725	64.0993	73.4044	81.4527	211.483	231.838	191.197	206.732	229.866	196.739	153.041	173.075	152.452
ITCH	ENSG00000078747	1349.97	1389.44	1248.94	835.473	904.269	951.348	1199.6	1061.3	975.633	1105.41	1067.46	1020.4
PKD2L2	ENSG00000078795	33.9921	67.1126	45.2515	94.1214	104.377	82.2725	107.538	63.5799	122.559	75.0585	75.418	83.2408
TP53INP2	ENSG00000078804	441.897	441.475	448.493	1912.64	1794.49	1779.87	1286.74	1628.62	1248.97	1133.68	1248.27	1100.84
SDF4	ENSG00000078808	2147.33	2178.01	2340.01	2064.86	1871.77	1820.42	1264.49	1422.23	1348.95	1739.02	1739.45	1736.83
MYH7B	ENSG00000078814	33.9921	28.3131	27.1509	3210.59	2624.49	3026.7	1068.89	1091.62	981.277	1283.79	1211.52	1201.85
BPIFB2	ENSG00000078898	0	0	0	0	0	0	0	0	0	0	0	0
TP73	ENSG00000078900	18.4528	23.0699	18.1006	27.8878	30.1088	20.8578	23.1762	25.432	21.7703	22.4201	25.1393	19.6411
TOLLIP	ENSG00000078902	528.334	610.305	622.46	621.666	543.966	456.555	461.67	358.004	508.78	512.737	480.548	512.539
UBE2D4	ENSG00000078967	298.159	312.493	294.638	256.8	229.831	220.166	258.647	346.266	283.82	262.217	284.268	260.01
CLUL1	ENSG00000079101	9.71202	12.5836	16.0894	17.4299	16.058	17.3815	13.9057	22.4975	17.7388	12.6722	16.4373	16.8352
RUNX1T1	ENSG00000079102	406.933	398.481	365.029	698.358	859.105	800.709	1012.34	1151.29	858.718	686.249	777.386	660.314
CDH17	ENSG00000079112	2.9136	3.1459	4.02236	1.16199	4.01451	5.79384	0.927049	1.9563	2.41892	1.94957	2.90069	3.74116
THOC1	ENSG00000079134	671.1	728.801	607.376	598.426	658.38	641.957	673.964	771.762	698.263	627.762	689.398	631.32
FKBP7	ENSG00000079150	305.928	338.709	312.738	745.999	807.92	786.803	704.557	875.446	753.898	557.578	651.689	600.456
OSBPL6	ENSG00000079156	479.774	468.739	429.387	341.626	338.223	340.678	323.54	314.965	335.424	369.444	356.785	354.475
SLC1A3	ENSG00000079215	1044.04	1018.22	1109.16	4351.66	4634.75	4556.28	5070.96	5031.62	4885.42	3343.52	3459.56	3458.7
XRCC5	ENSG00000079246	11854.5	13004.1	12151.5	4681.67	4644.79	4741.68	5361.12	5593.08	5270.03	7153.95	7331.02	7081.08
LXN	ENSG00000079257	84.4945	131.079	113.632	182.433	212.769	228.277	183.556	220.084	198.352	143.294	180.81	173.029
SP140	ENSG00000079263	7.76961	10.4863	8.04471	12.7819	12.0435	10.4289	4.63524	3.91261	8.06308	7.79829	8.70208	8.4176
MKNK1	ENSG00000079277	244.743	222.31	252.403	446.205	444.607	412.521	347.643	312.031	338.649	328.503	314.242	319.869
TNS1	ENSG00000079308	1956	1853.98	2073.52	2825.97	2840.27	2923.57	2258.29	2269.31	2153.65	2236.16	2229.67	2262.46
REXO1	ENSG00000079313	926.526	842.053	1028.72	605.398	529.916	549.256	455.181	445.059	470.078	638.485	575.304	648.156
SAR1A	ENSG00000079332	2898.07	3059.91	2778.44	2708.61	2726.86	2596.8	3057.41	3212.25	3142.18	2798.61	2874.59	2775
CDC14A	ENSG00000079335	83.5233	81.7934	79.4415	109.227	146.53	137.893	152.963	182.914	165.293	112.1	132.465	125.329
RAPGEF3	ENSG00000079337	47.5889	46.1399	45.2515	65.0716	52.1886	47.5095	29.6656	44.0169	35.4775	44.8402	45.4442	40.2174
CEACAM1	ENSG00000079385	10.6832	7.34044	8.04471	4.64797	7.0254	8.11138	2.78115	0.978152	2.41892	5.84872	4.83449	5.61174
SENP1	ENSG00000079387	663.331	675.32	605.365	247.505	329.19	316.344	310.561	423.54	337.037	399.662	452.508	403.11
DUSP13	ENSG00000079393	22.3376	35.6536	36.2012	198.701	183.664	144.846	190.972	161.395	205.609	129.647	122.796	130.005
CIC	ENSG00000079432	1057.64	921.749	1124.25	1399.04	1324.79	1318.68	955.787	977.174	979.664	1080.06	1030.71	1082.13
LIPE	ENSG00000079435	70.8977	82.8421	89.4974	80.1775	76.2757	81.1138	66.7475	80.2085	70.1488	69.2098	76.3849	76.6937
FDFT1	ENSG00000079459	3399.21	3607.3	3847.38	3167.59	2902.49	2808.85	3302.15	3503.74	3709.02	3180.73	3195.6	3382.94
PAFAH1B3	ENSG00000079462	443.839	457.204	524.918	331.168	293.059	288.533	232.689	275.839	278.176	322.654	325.845	347.928
OPHN1	ENSG00000079482	153.45	148.906	132.738	515.925	533.93	546.938	510.804	478.317	512.812	374.318	375.156	386.274
AFM	ENSG00000079557	0	0	0	1.16199	0	1.15877	0	0	0	0	0	0
KIF22	ENSG00000079616	1533.53	1634.82	1646.15	493.847	453.64	451.919	431.078	501.792	450.726	802.249	813.161	806.219
SCGN	ENSG00000079689	0	1.04863	0	0	0	0	0	0	1.61262	0	0	0.935289
CARMIL1	ENSG00000079691	89.3505	76.5503	79.4415	59.2616	76.2757	64.891	79.7262	100.75	88.6939	74.0837	81.2194	76.6937
PGM1	ENSG00000079739	924.584	975.23	1008.61	1156.18	1110.01	1098.51	1321.97	1126.83	1326.38	1095.66	1027.81	1121.41
DDX1	ENSG00000079785	3661.43	4243.82	3723.7	2248.46	2251.14	2248.01	2358.41	2501.14	2508.42	2680.66	2851.38	2729.17
DNM2	ENSG00000079805	2286.21	2332.16	2599.45	1887.08	1678.07	1662.83	1440.63	1415.39	1444.9	1797.51	1722.05	1811.66
EPB41L2	ENSG00000079819	2136.64	2208.42	2242.46	1270.06	1404.08	1470.48	1753.98	1965.11	1598.1	1684.43	1777.16	1708.77
RIMS1	ENSG00000079841	81.5809	65.0153	73.408	25.5638	35.127	32.4455	44.4983	35.2135	34.6712	49.7141	42.5435	44.8939
MOXD1	ENSG00000079931	269.023	316.687	306.705	414.831	412.491	376.6	416.245	433.322	341.875	351.898	372.256	328.287
STX7	ENSG00000079950	565.239	549.484	527.934	656.526	690.496	706.848	1057.76	857.84	974.02	743.762	672.961	730.461
RABL2B	ENSG00000079974	203.952	210.775	238.325	221.941	213.773	187.72	194.68	147.701	191.901	198.856	181.777	198.281
KEAP1	ENSG00000079999	911.958	895.533	915.086	800.613	685.478	685.991	640.591	586.891	691.812	753.51	688.431	736.073
DDX43	ENSG00000080007	1.9424	0	1.00559	0	1.00363	1.15877	0	0	0	0.974786	0	0.935289
PTPRH	ENSG00000080031	14.568	16.7781	20.1118	84.8255	53.1923	73.0024	69.5287	81.1866	73.374	52.6384	49.3118	54.2468
DCT	ENSG00000080166	0.971202	1.04863	4.02236	4.64797	5.01814	5.79384	4.63524	2.93446	4.83785	2.92436	2.90069	4.67645
SLC35C2	ENSG00000080189	407.905	402.675	486.705	472.931	380.375	367.329	314.27	251.385	271.726	379.192	328.745	354.475
CRYBG3	ENSG00000080200	668.187	685.807	566.147	837.797	988.573	1144.86	1180.13	1111.18	1070.78	871.459	894.381	897.878
EPHA6	ENSG00000080224	2.9136	2.09727	5.02795	4.64797	11.0399	3.4763	9.27049	2.93446	8.86939	5.84872	4.83449	5.61174
SCTR	ENSG00000080293	0	0	0	8.13395	4.01451	6.95261	3.7082	0	4.03154	3.89914	0.966898	3.74116
RFX3	ENSG00000080298	197.154	198.192	178.995	309.09	413.495	370.806	730.514	561.459	632.952	408.435	379.024	400.304
RIF1	ENSG00000080345	2322.14	2188.5	1797.99	1935.88	2130.7	2461.22	2282.39	2283.01	2185.9	2118.21	2108.8	2065.12
RAB21	ENSG00000080371	1070.26	1134.62	968.382	576.349	648.344	623.417	945.59	838.277	842.592	850.988	833.466	794.061
SLC4A4	ENSG00000080493	84.4945	77.5989	70.3912	593.778	685.478	778.692	779.648	776.653	678.911	467.897	499.886	493.833
SMARCA2	ENSG00000080503	834.262	831.567	765.253	1231.71	1301.71	1325.63	1190.33	1355.72	1244.94	1041.07	1120.63	1075.58
RDH8	ENSG00000080511	0.971202	0	1.00559	0	0	0	0	0	0	0	0	0
SESN1	ENSG00000080546	246.685	249.575	252.403	571.701	567.05	521.446	706.411	593.739	675.686	490.317	454.442	479.803
MID2	ENSG00000080561	79.6385	76.5503	77.4304	34.8598	38.1379	42.8744	52.8418	48.9076	41.928	54.588	52.2125	51.4409
DNAAF6	ENSG00000080572	0	0	0	0	0	0	0	0	0	0	0	0
COL5A3	ENSG00000080573	1841.4	1754.36	1933.75	9213.44	8346.17	8747.54	4676.96	4608.08	4775.76	4832.01	4737.8	4799.9
SRCAP	ENSG00000080603	2332.83	2031.2	2380.23	2155.5	2169.84	2295.52	1829.07	2057.05	1594.07	2024.63	1998.58	1971.59
PUM3	ENSG00000080608	1428.64	1561.42	1391.74	635.61	634.293	640.799	606.29	832.408	715.195	868.534	958.196	880.107
CPB2	ENSG00000080618	0	1.04863	0	1.16199	1.00363	2.31754	2.78115	4.89076	4.03154	0.974786	1.9338	1.87058
CHRNA3	ENSG00000080644	48.5601	54.529	40.2236	231.237	220.798	229.436	106.611	118.356	120.946	117.949	126.664	120.652
KCNN2	ENSG00000080709	11.6544	15.7295	9.0503	52.2897	50.1814	75.3199	87.1426	100.75	93.5317	48.7393	54.1463	58.9232
CNOT4	ENSG00000080802	370.999	406.87	376.09	490.361	466.687	471.619	523.783	804.041	521.681	444.502	539.529	445.198
PSEN1	ENSG00000080815	1020.73	1042.34	1026.71	1010.93	1048.79	1033.62	886.259	996.737	924.029	934.82	985.269	953.995
CPOX	ENSG00000080819	589.519	680.563	668.717	362.542	408.477	397.457	464.451	379.523	412.023	461.074	465.078	473.256
CLDND1	ENSG00000080822	1104.26	1101.07	880.896	730.894	796.881	765.946	977.109	953.699	971.601	916.299	908.884	854.854
MOK	ENSG00000080823	109.746	125.836	99.5533	153.383	185.671	181.927	170.577	191.718	174.163	139.394	161.472	146.84
HSP90AA1	ENSG00000080824	31168.8	35125	32225.1	10768.2	9908.82	9793.91	11075.5	13467.2	12290.6	17321	18415.5	17377.7
RBL1	ENSG00000080839	659.446	698.39	618.437	167.327	178.646	213.213	254.011	233.778	199.158	356.772	349.05	326.416
DLGAP4	ENSG00000080845	2216.28	2216.81	2391.29	1785.98	1569.67	1599.1	1216.29	1624.71	1319.12	1666.88	1721.08	1681.65
IGSF9B	ENSG00000080854	45.6465	31.459	51.285	81.3395	98.3555	117.036	88.9967	81.1866	65.3109	69.2098	67.6829	72.9526
CFHR2	ENSG00000080910	0	0	0	0	0	0	0	0	0	0	0	0
CROCCP3	ENSG00000080947	96.149	73.4044	94.5254	256.8	294.063	288.533	216.929	215.194	213.672	180.335	187.578	189.864
NDC80	ENSG00000080986	1460.69	1625.38	1435.98	235.885	240.871	232.912	304.072	353.113	312.847	660.905	693.266	628.514
AP4E1	ENSG00000081014	444.81	445.669	337.878	166.165	207.751	191.197	272.552	232.8	239.473	290.486	280.4	248.787
RSBN1	ENSG00000081019	369.057	387.995	284.582	180.109	284.027	296.645	491.336	477.338	412.023	346.049	367.421	327.351
MAGI3	ENSG00000081026	487.543	436.232	446.482	378.81	444.607	497.111	522.856	564.394	457.177	452.301	463.144	448.939
CXCL2	ENSG00000081041	15.5392	23.0699	16.0894	23.2399	14.0508	18.5403	6.48934	10.7597	8.86939	13.647	15.4704	13.0941
AFP	ENSG00000081051	5.82721	6.2918	1.00559	0	0	0	1.8541	1.9563	0.806308	2.92436	2.90069	0.935289
COL4A4	ENSG00000081052	6.79841	4.19454	3.01677	6.97196	4.01451	4.63507	7.41639	0.978152	4.03154	6.8235	2.90069	3.74116
TCF7	ENSG00000081059	144.709	147.857	134.749	89.4735	84.3047	64.891	114.954	144.767	118.527	114.05	119.895	104.752
OSTM1	ENSG00000081087	241.829	296.763	230.28	418.317	485.756	420.633	481.138	449.95	449.114	366.52	395.461	358.216
CDH7	ENSG00000081138	2.9136	11.535	4.02236	44.1557	42.1524	49.827	59.3311	60.6454	51.6037	34.1175	36.7421	34.6057
IMPG2	ENSG00000081148	11.6544	9.43771	8.04471	67.3956	66.2394	74.1611	82.5073	79.2303	77.4056	51.6637	50.2787	52.3762
PCNP	ENSG00000081154	1749.13	1815.19	1569.72	801.775	876.167	921.22	1664.98	1448.64	1436.84	1392.97	1316.91	1289.76
EXD2	ENSG00000081177	371.97	410.016	390.169	428.775	429.553	450.761	397.704	375.611	417.667	384.066	387.726	404.045
ARG2	ENSG00000081181	433.156	540.046	482.683	327.682	302.092	275.787	379.163	319.856	376.546	369.444	368.388	369.439
MEF2C	ENSG00000081189	1045.98	979.424	935.198	7213.65	7923.64	7894.69	9892.54	10946.5	9944.2	5834.09	6452.11	6258.96
PTPRC	ENSG00000081237	1.9424	0	2.01118	3.48598	0	2.31754	0.927049	1.9563	2.41892	1.94957	0.966898	1.87058
CACNA1S	ENSG00000081248	181.615	162.538	182.012	3215.23	3185.51	3558.58	1886.54	1581.67	1740.82	1621.07	1594.41	1687.26
PKP1	ENSG00000081277	10.6832	8.38907	11.0615	0	0	0	0	1.9563	3.22523	3.89914	2.90069	4.67645
UBA5	ENSG00000081307	846.888	860.928	763.242	464.797	560.024	567.796	755.545	716.008	728.096	678.451	680.696	670.602
STK17B	ENSG00000081320	1005.19	1114.7	840.672	319.548	385.393	370.806	524.71	397.13	482.172	609.241	597.543	547.144
CDC14B	ENSG00000081377	374.884	404.773	350.951	519.411	596.155	577.066	596.092	564.394	627.308	479.595	501.82	506.927
ZNF510	ENSG00000081386	243.772	251.672	237.319	310.252	347.255	337.201	423.661	444.081	360.42	316.805	335.514	303.969
LRP2	ENSG00000081479	67.0129	61.8694	68.3801	290.498	313.132	319.82	391.215	346.266	323.329	240.772	233.989	231.952
ZNF506	ENSG00000081665	211.722	208.678	232.291	293.984	368.331	393.981	436.64	476.36	449.92	306.083	339.381	351.669
JMJD4	ENSG00000081692	310.784	309.347	352.962	231.237	171.62	214.372	179.847	142.81	185.451	231.999	197.247	238.499
DUSP12	ENSG00000081721	526.391	536.901	520.895	280.04	285.03	274.628	313.342	289.533	330.586	364.57	351.951	362.892
AACS	ENSG00000081760	333.122	346.049	333.856	1158.51	966.494	1042.89	1141.2	877.403	1149.8	835.392	705.835	828.666
DELE1	ENSG00000081791	491.428	553.679	499.778	1055.09	1025.71	965.254	891.821	837.298	875.65	772.031	775.452	752.908
SLC13A1	ENSG00000081800	0	0	0	0	0	0	0	0	0	0	0	0
CADPS2	ENSG00000081803	57.3009	81.7934	47.2627	261.448	261.947	303.597	225.273	187.805	238.667	171.562	171.141	188.928
PCDHB4	ENSG00000081818	14.568	7.34044	6.03353	22.0779	22.0798	30.128	27.8115	32.279	29.0271	20.4705	20.3049	21.5117
PCDHA6	ENSG00000081842	332.151	349.195	296.649	750.647	898.247	807.661	811.168	985.978	860.331	605.342	720.339	641.608
PCDHGA2	ENSG00000081853	1561.69	1548.83	1846.26	3487.14	3225.66	3103.18	2152.61	2604.82	2281.05	2251.76	2369.87	2289.59
HSPB11	ENSG00000081870	418.588	462.448	412.292	234.723	261.947	247.976	268.844	300.293	292.69	300.234	324.878	307.71
PHLPP1	ENSG00000081913	399.164	401.627	394.191	389.268	345.248	384.711	466.306	457.775	460.402	405.511	384.825	404.045
ATP8B1	ENSG00000081923	474.918	478.177	443.465	40.6698	43.156	47.5095	45.4254	33.2572	69.3425	186.184	172.108	176.77
IL12RB2	ENSG00000081985	8.74081	9.43771	6.03353	2.32399	9.03265	6.95261	3.7082	3.91261	4.03154	4.87393	6.76829	5.61174
SMARCD3	ENSG00000082014	513.766	585.138	630.504	2047.43	1606.81	1776.39	1259.86	1276.49	1241.71	1186.31	1116.77	1153.21
WDR70	ENSG00000082068	499.198	514.879	499.778	464.797	437.582	433.379	389.361	502.77	448.307	433.78	464.111	445.198
FYB1	ENSG00000082074	4.85601	3.1459	5.02795	3.48598	3.01088	4.63507	0.927049	3.91261	3.22523	2.92436	2.90069	3.74116
MPP4	ENSG00000082126	227.261	201.338	210.168	9.29594	4.01451	6.95261	8.34344	2.93446	5.64416	81.882	63.8153	69.2114
STRADB	ENSG00000082146	547.758	575.7	508.828	534.517	524.897	589.813	890.894	892.075	956.281	645.308	639.119	686.502
BZW1	ENSG00000082153	5460.09	5845.09	4945.49	1231.71	1272.6	1301.3	1644.58	1620.8	1681.15	2747.92	2739.22	2533.7
PGR	ENSG00000082175	0	1.04863	0	0	0	0	0	1.9563	0	0	0.966898	0
C1QTNF3	ENSG00000082196	73.8113	73.4044	78.4359	168.489	143.519	188.879	261.428	273.883	271.726	163.764	158.571	180.511
ME2	ENSG00000082212	1081.92	1152.45	1041.79	463.635	491.778	509.858	580.333	621.127	561.997	695.022	716.471	677.149
C5orf22	ENSG00000082213	654.59	639.667	600.337	333.492	341.233	322.137	442.202	442.125	394.285	466.923	451.541	425.557
CCNT2	ENSG00000082258	734.228	674.272	603.353	837.797	976.53	958.301	1124.51	1184.54	1083.68	874.383	910.818	864.207
FAM135A	ENSG00000082269	174.816	145.76	134.749	174.299	224.813	230.595	309.634	263.123	277.37	215.428	204.015	211.375
COL19A1	ENSG00000082293	89.3505	92.2798	77.4304	110.389	150.544	225.96	203.951	179.002	174.969	132.571	135.366	152.452
EPB41L3	ENSG00000082397	1510.22	1531.01	1311.29	4133.21	4462.13	4265.42	4775.23	5888.48	4904.77	3334.74	3843.42	3450.28
COBLL1	ENSG00000082438	151.507	138.42	121.676	332.33	364.317	424.109	317.051	349.2	287.046	254.419	274.599	262.816
DLG3	ENSG00000082458	375.855	383.8	417.319	304.442	295.067	285.057	274.406	271.926	273.338	307.058	302.639	311.451
KCNK2	ENSG00000082482	533.19	569.408	527.934	183.595	178.646	174.974	266.99	297.358	269.307	323.629	330.679	315.193
SERTAD4	ENSG00000082497	810.953	837.859	783.354	60.4236	62.2249	79.955	79.7262	58.6891	77.4056	315.831	296.838	294.616
TRAF5	ENSG00000082512	307.871	269.499	285.587	852.903	1024.7	1015.08	858.447	835.342	823.24	642.384	687.464	679.955
MRPL22	ENSG00000082515	505.996	614.499	544.024	331.168	294.063	276.946	329.102	351.157	324.942	377.242	399.329	368.504
GEMIN5	ENSG00000082516	1271.3	1321.28	1322.35	951.672	815.949	903.839	901.091	855.883	878.069	1006.95	950.461	992.342
OPRK1	ENSG00000082556	33.0209	24.1186	29.1621	95.2834	103.374	119.353	86.2155	73.3614	74.9866	68.235	64.7822	70.1467
NFE2L1	ENSG00000082641	5155.14	5245.27	5585.04	8140.92	7787.15	8030.26	5621.62	6630.9	5839.28	5971.54	6297.41	6149.53
SEMA5B	ENSG00000082684	85.4657	105.912	110.615	343.95	345.248	310.55	335.592	311.052	287.852	242.722	245.592	229.146
GSK3B	ENSG00000082701	1781.18	1812.04	1670.28	1425.77	1617.85	1709.18	2030.24	1953.37	1721.47	1705.88	1720.11	1643.3
ITGB5	ENSG00000082781	3857.61	3995.3	4122.92	605.398	599.166	508.699	403.266	375.611	407.185	1601.57	1544.14	1572.22
ERC1	ENSG00000082805	1618.99	1531.01	1565.7	1329.32	1425.15	1471.64	1318.26	1539.61	1303.8	1375.42	1435.84	1385.16
XPO1	ENSG00000082898	7167.47	6958.73	5697.67	2511.07	3183.51	3132.15	4251.45	3895.98	4018.64	4590.27	4444.83	4162.97
LINC01587	ENSG00000082929	0.971202	1.04863	0	3.48598	3.01088	2.31754	0.927049	0	4.03154	1.94957	0.966898	1.87058
RNF13	ENSG00000082996	229.204	235.943	211.174	269.582	275.998	276.946	325.394	355.069	342.681	266.117	278.467	272.169
TRPM3	ENSG00000083067	19.424	15.7295	24.1341	23.2399	29.1052	17.3815	34.3008	34.2353	34.6712	25.3444	25.1393	25.2528
PALB2	ENSG00000083093	392.365	416.308	377.096	252.152	235.853	231.754	265.136	270.948	284.627	294.385	292.97	289.004
DOP1A	ENSG00000083097	738.113	715.168	646.594	898.221	1034.74	1118.21	1011.41	1000.65	1015.95	852.938	881.811	894.137
LYRM2	ENSG00000083099	922.641	930.138	847.712	735.542	779.819	725.389	1070.74	999.672	1010.3	889.98	865.374	848.307
BCKDHB	ENSG00000083123	280.677	348.146	321.789	352.084	364.317	326.773	392.142	341.375	370.095	329.478	336.48	331.092
KAT6A	ENSG00000083168	1854.02	1808.89	1772.85	1277.03	1405.08	1469.32	1755.83	1896.64	1413.46	1592.8	1632.12	1491.79
TUT7	ENSG00000083223	556.498	545.29	508.828	454.339	472.709	539.986	569.208	596.673	499.911	512.737	516.323	496.639
ULK2	ENSG00000083290	438.983	417.356	406.258	410.184	409.48	404.41	508.95	452.885	419.28	439.629	408.998	396.563
GRHL2	ENSG00000083307	0.971202	0	1.00559	9.29594	8.02902	13.9052	10.1975	5.86891	7.25677	6.8235	4.83449	6.54703
TNPO1	ENSG00000083312	5877.71	5764.34	4730.29	2558.71	3182.5	3319.87	5487.2	4654.05	4937.02	4604.89	4326.87	4268.66
PLOD1	ENSG00000083444	3825.56	3886.24	4664.93	8153.7	7390.72	7392.94	5167.37	5213.55	5358.72	5371.07	5286.03	5506.98
P2RX5	ENSG00000083454	34.9633	17.8268	40.2236	686.738	640.315	655.863	393.996	369.742	395.897	342.15	332.613	342.316
ITGAE	ENSG00000083457	245.714	334.514	265.476	223.103	197.715	202.784	208.586	132.051	200.771	217.377	209.817	214.181
DIS3	ENSG00000083520	1885.1	1957.8	1661.23	902.869	1091.95	1164.56	1296.94	1430.06	1289.29	1337.41	1423.27	1327.18
PIBF1	ENSG00000083535	385.567	403.724	366.034	269.582	290.048	294.327	367.111	409.846	391.059	333.377	351.951	344.186
TDRD3	ENSG00000083544	335.065	341.855	316.761	275.392	278.005	294.327	380.09	486.142	391.059	322.654	354.852	328.287
	ENSG00000083622	0	0	0	0	0	0	0	0	0	0	0	0
NUFIP1	ENSG00000083635	370.999	408.967	361.006	123.171	139.504	149.481	211.367	235.735	202.383	232.974	248.493	230.081
PDS5B	ENSG00000083642	1271.3	1145.11	1076.99	1022.55	1131.09	1156.45	1524.07	1995.43	1481.99	1245.78	1372.99	1217.75
OXCT1	ENSG00000083720	1396.59	1500.6	1345.48	355.57	373.35	368.488	404.193	404.955	374.127	708.669	714.538	661.25
RRAGB	ENSG00000083750	115.573	122.69	112.626	207.997	241.874	269.993	236.397	234.757	270.113	179.361	192.413	212.311
EPYC	ENSG00000083782	4.85601	12.5836	6.03353	2.32399	1.00363	0	0	0.978152	0	1.94957	4.83449	1.87058
CYLD	ENSG00000083799	321.468	359.681	296.649	377.648	358.295	453.078	484.847	402.021	436.213	383.091	357.752	382.533
SLC27A5	ENSG00000083807	116.544	91.2312	109.609	147.573	136.493	126.306	109.392	90.9682	101.595	118.924	101.524	107.558
ZNF324	ENSG00000083812	192.298	174.073	191.062	213.807	188.682	235.23	176.139	156.504	173.356	186.184	165.34	189.864
ZNF671	ENSG00000083814	99.0626	108.009	115.643	212.645	205.744	183.085	177.993	175.089	181.419	154.991	156.637	155.258
ZNF416	ENSG00000083817	101.976	108.009	104.581	116.199	102.37	99.654	131.641	92.9245	121.752	113.075	96.6898	106.623
ZNF586	ENSG00000083828	142.767	148.906	175.978	142.925	179.649	166.863	178.92	157.483	145.942	150.117	155.671	156.193
ZNF446	ENSG00000083838	143.738	111.155	134.749	216.131	228.827	201.626	158.525	138.898	164.487	163.764	153.737	159.934
ZNF264	ENSG00000083844	469.09	461.399	450.504	467.121	560.024	551.574	637.81	566.35	603.925	510.788	508.588	521.891
RPS5	ENSG00000083845	7250.99	8109.09	8073.87	8731.22	7230.14	6927.11	8036.59	8051.17	8846.81	7684.24	7467.35	7787.22
FAT1	ENSG00000083857	8716.53	7681.24	7428.29	5423.02	6134.17	7077.75	5142.34	4204.1	4198.45	6234.73	5716.3	5830.59
YTHDC1	ENSG00000083896	1405.33	1453.41	1380.67	1293.3	1330.81	1356.92	1365.54	1724.48	1452.16	1310.11	1442.61	1354.3
CHMP2B	ENSG00000083937	405.962	436.232	316.761	213.807	234.849	202.784	369.892	360.938	377.352	325.579	328.745	298.357
SMAP2	ENSG00000084070	955.662	963.695	1059.89	696.034	658.38	650.069	663.767	871.534	718.42	746.686	794.79	780.967
PPIE	ENSG00000084072	521.535	548.436	577.208	395.078	338.223	356.901	375.455	337.463	376.546	416.234	388.693	420.88
ZMPSTE24	ENSG00000084073	1245.08	1120.99	937.209	524.059	748.706	733.5	840.833	671.013	727.29	857.812	806.393	768.808
STARD7	ENSG00000084090	2768.9	2936.18	2835.76	2555.22	2413.73	2449.64	2935.96	2803.38	2855.94	2669.94	2600.96	2642.19
NOA1	ENSG00000084092	349.633	376.46	402.236	484.551	466.687	439.173	516.366	593.739	510.393	433.78	461.21	440.521
REST	ENSG00000084093	1198.46	1116.8	984.472	657.688	742.685	869.076	1178.28	1130.74	1099	998.181	954.328	964.283
HAL	ENSG00000084110	2.9136	0	0	3.48598	1.00363	1.15877	0	5.86891	2.41892	1.94957	1.9338	0.935289
SSH1	ENSG00000084112	1592.77	1518.42	1505.37	708.816	731.645	784.486	835.271	758.068	724.871	1023.53	951.428	957.736
GSTP1	ENSG00000084207	4447.13	4671.66	5092.3	2470.4	2303.33	2106.64	2104.4	2437.56	2311.68	2916.56	2979.01	3039.69
APLP2	ENSG00000084234	6513.85	6788.86	6758.56	6181.8	5998.68	6124.09	4514.73	5206.71	4472.59	5490	5728.87	5472.38
FAM234B	ENSG00000084444	241.829	202.386	207.151	431.099	385.393	392.822	338.373	263.123	299.14	319.73	272.665	285.263
SLCO1A2	ENSG00000084453	3.88481	2.09727	2.01118	5.80996	4.01451	1.15877	2.78115	3.91261	4.03154	3.89914	2.90069	2.80587
WBP11	ENSG00000084463	2728.11	2682.41	2972.52	1062.06	1086.93	1066.07	1156.03	1761.65	1230.43	1615.22	1753.95	1684.46
EIF3I	ENSG00000084623	3500.21	3980.61	4023.36	2228.7	1903.88	1896.9	1863.37	1823.28	2066.57	2447.69	2435.62	2557.08
NKAIN1	ENSG00000084628	276.792	241.186	268.492	240.533	238.863	202.784	258.647	354.091	253.181	250.52	267.831	235.693
COL16A1	ENSG00000084636	1614.14	1534.15	1797.99	4415.57	3732.49	3990.8	2082.15	1815.45	2097.21	2504.23	2268.34	2442.04
TXLNA	ENSG00000084652	2432.86	2449.61	2508.94	1817.36	1679.07	1746.26	1369.25	1327.35	1250.58	1802.38	1729.78	1731.22
APOB	ENSG00000084674	4.85601	3.1459	5.02795	2.32399	2.00726	9.27014	3.7082	2.93446	4.83785	3.89914	2.90069	5.61174
NCOA1	ENSG00000084676	879.909	890.29	928.159	3857.82	3817.8	4045.26	4333.95	5335.82	4117.01	2892.19	3257.48	2967.67
AGBL5	ENSG00000084693	924.584	1083.24	1173.52	1051.6	1020.69	907.315	1051.27	1440.82	1182.05	971.862	1135.14	1065.29
EFR3B	ENSG00000084710	457.436	468.739	480.672	360.218	341.233	336.043	341.154	298.336	323.329	373.343	351.951	364.763
KIF3C	ENSG00000084731	695.38	759.211	760.225	859.875	823.978	827.36	686.016	804.041	707.938	713.543	762.882	732.332
RAB10	ENSG00000084733	2170.64	2300.7	2080.56	1328.16	1628.89	1565.5	2197.11	2511.9	2170.58	1867.69	2057.56	1905.18
GCKR	ENSG00000084734	1.9424	1.04863	1.00559	0	3.01088	2.31754	2.78115	2.93446	1.61262	1.94957	1.9338	1.87058
HADHA	ENSG00000084754	3625.5	3836.95	3876.55	4500.4	3949.28	4061.48	3906.58	4223.66	4256.5	3840.66	3839.55	3940.37
MAPRE3	ENSG00000084764	196.183	191.9	211.174	844.769	731.645	724.23	636.883	630.908	628.92	525.41	501.82	503.186
CAD	ENSG00000084774	2688.29	2560.76	2797.55	1490.84	1401.06	1458.89	1076.3	929.245	1061.91	1693.2	1543.17	1670.43
CD59	ENSG00000085063	9360.44	9792.14	8690.3	2292.61	2114.64	2088.1	1898.6	1643.3	1969.81	4438.2	4230.18	4018
CD82	ENSG00000085117	484.63	427.843	530.951	479.903	498.803	421.792	503.388	435.278	466.046	472.771	435.104	458.292
BCORL1	ENSG00000085185	279.706	306.201	326.816	483.389	500.81	521.446	458.889	593.739	497.492	389.914	450.574	433.974
ATRX	ENSG00000085224	1690.86	1654.74	1428.94	2000.95	2370.57	2756.71	3020.33	3419.62	3116.38	2183.52	2396.94	2389.66
AK6	ENSG00000085231	529.305	634.424	513.856	217.293	238.863	236.389	286.458	304.205	314.46	338.251	372.256	344.186
FCN1	ENSG00000085265	0	0	1.00559	0	0	0	0	0	0	0	0	0
MYNN	ENSG00000085274	375.855	365.973	357.99	285.85	317.146	337.201	422.734	385.392	421.699	353.847	341.315	364.763
MECOM	ENSG00000085276	165.104	171.976	165.922	103.417	109.395	120.512	90.8508	85.0993	58.0542	116	116.028	106.623
SCAMP1	ENSG00000085365	435.098	387.995	303.688	413.669	415.502	456.555	862.155	755.134	842.592	563.426	501.82	542.468
PREP	ENSG00000085377	1023.65	1085.34	1069.95	976.074	928.356	834.313	910.362	828.495	936.123	934.82	905.016	918.454
HACE1	ENSG00000085382	264.167	268.45	211.174	165.003	172.624	181.927	250.303	167.264	237.861	222.251	193.38	206.699
SEH1L	ENSG00000085415	1333.46	1400.97	1266.04	395.078	471.705	447.284	585.895	499.836	595.055	762.283	746.445	742.62
WDR47	ENSG00000085433	429.271	463.496	422.347	354.408	410.484	344.154	430.151	405.933	419.28	393.814	408.031	385.339
WDFY1	ENSG00000085449	1281.01	1305.55	1077.99	578.672	689.492	676.72	884.405	908.704	818.403	900.702	922.421	832.408
OVGP1	ENSG00000085465	11.6544	16.7781	13.0727	52.2897	54.1959	44.0332	17.6139	15.6504	21.7703	24.3697	28.04	24.3175
SLC25A24	ENSG00000085491	1755.93	1780.58	1383.69	762.267	894.232	928.173	1333.1	1251.06	1231.23	1268.2	1246.33	1155.08
MAP3K4	ENSG00000085511	531.247	551.581	572.18	495.009	484.752	456.555	465.379	503.748	466.046	479.595	491.184	480.739
PILRA	ENSG00000085514	31.0784	22.0213	44.2459	103.417	80.2902	89.2251	38.9361	46.9513	46.7659	52.6384	48.3449	56.1174
IGSF9	ENSG00000085552	54.3873	42.994	51.285	105.741	90.3265	78.7962	63.0393	49.8858	83.0497	70.1846	58.9808	69.2114
ABCB1	ENSG00000085563	9.71202	5.24317	4.02236	8.13395	8.02902	6.95261	8.34344	3.91261	8.86939	8.77307	5.80139	6.54703
ZNF213	ENSG00000085644	244.743	222.31	244.358	191.729	179.649	178.45	134.422	195.63	159.649	182.285	190.479	185.187
AKR1B1	ENSG00000085662	1182.92	1338.06	1305.25	1315.38	1115.03	1078.81	1268.2	1045.64	1334.44	1207.76	1113.87	1211.2
CPNE3	ENSG00000085719	1227.6	1294.01	1126.26	795.965	945.417	917.744	1300.65	1144.44	1196.56	1088.84	1078.09	1058.75
RRN3	ENSG00000085721	814.838	883.998	850.728	615.856	648.344	595.607	762.034	626.018	754.704	711.594	686.497	715.496
CTTN	ENSG00000085733	4094.59	4085.48	4172.19	3225.69	2870.38	3063.78	2160.95	2189.11	2232.67	3029.64	2898.76	2980.77
WNT11	ENSG00000085741	1.9424	2.09727	5.02795	204.511	143.519	165.704	136.276	118.356	106.433	105.277	86.0539	86.9819
MTIF2	ENSG00000085760	788.616	870.366	683.801	524.059	460.665	491.318	577.551	675.903	600.699	613.14	638.153	576.138
DDHD2	ENSG00000085788	871.168	937.479	730.058	610.046	673.434	685.991	862.155	700.357	820.821	764.232	734.842	728.59
TTC39A	ENSG00000085831	10.6832	7.34044	9.0503	13.9439	12.0435	12.7464	12.9787	11.7378	11.2883	11.6974	9.66898	10.2882
EPS15	ENSG00000085832	1220.8	1197.54	1057.88	866.847	922.334	874.87	1207.94	1240.3	1198.17	1074.21	1073.26	1026.95
ORC1	ENSG00000085840	788.616	763.406	814.527	135.953	123.446	125.147	155.744	181.936	155.617	356.772	334.547	346.057
MGST2	ENSG00000085871	66.0417	85.988	77.4304	300.956	286.034	259.564	237.324	280.73	302.365	189.108	210.784	210.44
CHERP	ENSG00000085872	1480.11	1297.16	1621.01	995.828	994.595	949.031	800.97	924.354	815.984	1054.72	1022.98	1073.71
ATG16L1	ENSG00000085978	387.509	441.475	389.163	406.698	398.44	392.822	349.497	322.79	319.298	365.545	370.322	349.798
USP40	ENSG00000085982	696.351	739.287	705.924	763.429	806.917	827.36	834.344	728.724	732.934	738.888	726.14	724.849
POMGNT1	ENSG00000085998	1041.13	1024.52	1093.08	1310.73	1185.28	1151.82	771.305	688.619	786.957	985.509	922.421	953.06
RAD54L	ENSG00000085999	522.506	610.305	600.337	231.237	231.838	209.737	195.607	191.718	182.226	308.032	324.878	313.322
MAST2	ENSG00000086015	1180.98	1199.64	1176.54	1629.11	1528.53	1557.38	1134.71	1150.31	1080.45	1248.7	1238.6	1201.85
DNAJA1	ENSG00000086061	4662.74	5301.89	4983.7	2838.75	2881.42	2661.69	3222.42	3671.98	3262.32	3482.91	3765.1	3522.3
B4GALT1	ENSG00000086062	1618.99	1622.24	1549.61	805.261	857.098	916.585	739.785	761.981	724.065	1026.45	1024.91	1007.31
CHMP5	ENSG00000086065	908.073	1017.17	885.924	579.834	536.941	574.749	758.326	799.151	762.767	732.064	748.379	723.914
NFX1	ENSG00000086102	1192.64	1346.45	1224.81	833.149	876.167	867.917	854.739	843.167	815.177	931.895	972.699	928.742
AQP6	ENSG00000086159	3.88481	5.24317	4.02236	5.80996	3.01088	4.63507	4.63524	0	4.03154	4.87393	2.90069	3.74116
DIMT1	ENSG00000086189	845.917	855.685	781.343	467.121	504.825	473.936	678.6	718.942	691.006	651.157	662.325	636.932
IPO11	ENSG00000086200	1111.05	1162.94	959.332	282.364	318.15	346.472	496.898	422.562	437.019	624.838	598.51	559.303
FOLH1	ENSG00000086205	0	0	0	0	0	3.4763	0	0	0	0	0	0.935289
EIF2AK1	ENSG00000086232	2353.22	2516.72	2540.12	2052.08	1834.63	1845.92	2066.39	2405.28	2061.73	2085.07	2155.22	2081.02
NME8	ENSG00000086288	0.971202	1.04863	0	0	1.00363	2.31754	0.927049	1.9563	0.806308	0.974786	0.966898	0.935289
EPDR1	ENSG00000086289	333.122	381.703	397.208	855.227	867.134	821.566	674.892	628.952	658.754	586.821	603.344	598.585
SNX10	ENSG00000086300	32.0497	39.8481	25.1397	9.29594	12.0435	16.2228	24.1033	21.5194	13.7072	21.4453	23.2055	17.7705
SEPHS1	ENSG00000086475	1348.03	1591.83	1530.51	744.837	720.605	720.754	915.924	886.206	920.804	980.635	1012.34	1024.14
MRPL28	ENSG00000086504	715.776	808.497	828.605	470.607	415.502	354.583	377.309	384.414	378.965	502.99	508.588	498.509
HBQ1	ENSG00000086506	0.971202	2.09727	2.01118	2.32399	1.00363	0	0.927049	0	2.41892	0.974786	0.966898	1.87058
ITPKC	ENSG00000086544	196.183	173.025	196.09	324.196	298.077	294.327	266.99	235.735	260.437	249.545	226.254	240.369
CEACAM6	ENSG00000086548	0	0	0	0	0	0	2.78115	0.978152	1.61262	0.974786	0	0.935289
FAT2	ENSG00000086570	15.5392	19.924	15.0838	15.1059	30.1088	23.1754	25.9574	19.563	12.0946	18.5209	22.2387	15.8999
RBM22	ENSG00000086589	1027.53	1102.11	1094.08	654.202	660.387	595.607	635.955	708.182	603.925	749.61	784.154	733.267
TMED2	ENSG00000086598	4996.83	5107.9	4616.66	2842.23	3162.43	2851.73	3271.56	3372.67	3338.92	3613.53	3696.45	3489.56
ERO1B	ENSG00000086619	85.4657	45.0913	54.3018	58.0996	80.2902	70.6848	63.0393	41.0824	66.9236	67.2602	53.1794	61.7291
ZFAND6	ENSG00000086666	601.174	626.034	527.934	544.975	625.26	539.986	874.207	905.769	922.416	659.93	691.332	665.926
HSD17B2	ENSG00000086696	4.85601	3.1459	5.02795	5.80996	10.0363	6.95261	10.1975	1.9563	4.83785	6.8235	4.83449	5.61174
TXLNG	ENSG00000086712	538.046	569.408	488.716	268.42	318.15	322.137	391.215	420.606	391.866	391.864	415.766	390.016
PPEF1	ENSG00000086717	11.6544	8.38907	7.03912	10.4579	9.03265	9.27014	2.78115	2.93446	5.64416	7.79829	6.76829	6.54703
LAT2	ENSG00000086730	27.1936	30.4104	33.1844	34.8598	45.1633	41.7156	18.541	28.3664	28.2208	25.3444	32.8745	32.7351
HUWE1	ENSG00000086758	6978.08	6501.53	6767.61	5798.34	6218.48	6873.81	5531.7	5387.66	4550	5894.53	5770.45	5707.14
ZW10	ENSG00000086827	873.11	871.415	782.348	320.71	371.342	356.901	388.433	434.3	411.217	517.611	529.86	497.574
ALG9	ENSG00000086848	705.092	716.217	705.924	514.763	552.999	566.637	563.646	536.028	583.767	577.073	574.337	596.715
MYBPC2	ENSG00000086967	36.9057	37.7508	39.218	1603.55	1297.69	1517.99	1153.25	1182.59	1187.69	864.635	817.996	880.107
NOX4	ENSG00000086991	61.1857	66.0639	66.3689	9.29594	14.0508	15.064	12.0516	5.86891	8.06308	27.294	27.0731	28.0587
ACOX3	ENSG00000087008	318.554	351.292	330.839	314.9	314.136	325.614	317.051	257.254	343.487	306.083	293.937	322.675
MTMR2	ENSG00000087053	1320.83	1387.34	1269.05	587.968	619.238	647.751	747.201	863.709	811.146	868.534	909.851	881.043
PPP1R15A	ENSG00000087074	1021.7	1147.21	1054.86	763.429	659.384	612.988	559.01	859.796	624.889	751.56	847.969	733.267
HSD17B14	ENSG00000087076	34.9633	28.3131	42.2347	32.5358	40.1451	30.128	25.0303	20.5412	16.9325	29.2436	28.04	28.0587
TRIP6	ENSG00000087077	959.547	973.132	1062.91	635.61	632.286	578.225	454.254	359.96	470.884	657.981	620.748	666.861
ACHE	ENSG00000087085	63.1281	75.5016	78.4359	575.187	452.636	453.078	416.245	438.212	429.762	327.528	313.275	312.387
FTL	ENSG00000087086	9318.68	9931.61	11080.6	5805.32	5032.19	4898.11	4146.69	4771.43	4804.79	6194.77	6240.36	6610.62
SRRT	ENSG00000087087	2471.71	2503.09	2783.47	2012.57	1920.94	1895.74	1496.26	2052.16	1532.79	1914.48	2062.39	1965.98
BAX	ENSG00000087088	1063.47	1055.97	1170.51	563.567	469.698	435.697	367.111	333.55	408.798	642.384	584.973	637.867
NLK	ENSG00000087095	262.224	225.456	240.336	248.666	261.947	256.088	298.51	317.9	305.591	262.217	258.162	261.881
PIGS	ENSG00000087111	699.265	744.53	832.628	1131.78	1002.62	990.747	673.964	799.151	710.357	786.652	814.128	799.672
ADAMTS2	ENSG00000087116	910.987	878.755	971.399	1646.54	1481.35	1668.63	900.164	879.359	892.583	1081.04	1035.55	1095.22
TMPRSS11E	ENSG00000087128	0	0	0	0	0	0	0	0	0	0	0	0
ATXN7L3	ENSG00000087152	1281.01	1235.29	1396.76	1261.92	1107	1140.23	1090.21	893.053	1046.59	1163.89	1029.75	1144.79
PGS1	ENSG00000087157	336.036	352.341	350.951	415.993	387.4	393.981	368.965	268.014	318.492	357.746	321.01	337.639
PSMC5	ENSG00000087191	2435.77	2732.74	2814.64	1803.41	1618.85	1484.38	1408.19	1533.74	1503.76	1813.1	1865.15	1853.74
UIMC1	ENSG00000087206	464.234	530.609	518.884	385.782	302.092	356.901	329.102	357.026	379.771	378.217	378.057	404.045
CETP	ENSG00000087237	0	1.04863	0	0	0	0	0	0	0	0	0	0
MMP2	ENSG00000087245	1010.05	963.695	1168.49	7936.41	7301.39	7426.54	4179.14	4920.11	4388.73	4021.97	4262.09	4057.29
MT3	ENSG00000087250	0.971202	1.04863	0	17.4299	15.0544	13.9052	45.4254	40.1042	41.1217	21.4453	18.3711	19.6411
LPCAT2	ENSG00000087253	152.479	123.739	117.654	66.2336	68.2467	71.8436	80.6532	82.1648	85.4686	97.4786	87.0208	88.8525
GNAO1	ENSG00000087258	268.052	226.505	253.408	368.352	349.263	375.441	421.807	501.792	388.64	340.2	347.116	330.157
OGFOD1	ENSG00000087263	1658.81	1861.33	1744.7	963.292	940.399	903.839	922.414	1124.88	955.475	1147.32	1244.4	1153.21
SH3BP2	ENSG00000087266	775.019	739.287	758.214	895.897	920.327	927.014	712.901	574.175	666.817	759.358	711.637	742.62
NOP14	ENSG00000087269	1723.88	1898.03	1927.71	998.152	914.305	976.841	898.31	1247.14	994.984	1170.72	1287.91	1244.87
ADD1	ENSG00000087274	4364.58	4534.29	4667.94	4211.06	3799.74	3881.87	3822.22	3904.78	3674.35	3977.13	3900.47	3912.32
L2HGDH	ENSG00000087299	211.722	196.095	168.939	142.925	140.508	169.18	212.294	163.351	191.901	185.209	159.538	172.093
TXNDC16	ENSG00000087301	206.866	204.484	158.883	166.165	227.824	241.024	270.698	231.822	248.343	210.554	212.718	210.44
RTRAF	ENSG00000087302	2882.53	3134.37	2967.49	3501.08	3371.19	3261.93	3240.96	3443.1	3319.57	3079.35	3180.13	3080.84
NID2	ENSG00000087303	2747.53	2583.83	2836.77	6756.99	7107.69	6981.58	4854.95	4808.6	4794.31	4510.34	4661.41	4611.91
GMCL1	ENSG00000087338	208.808	181.414	159.889	131.305	203.736	179.609	232.689	246.494	255.6	188.134	202.082	196.411
SF3B2	ENSG00000087365	5441.64	5580.83	6165.27	3559.18	3233.69	3148.37	2863.65	3637.75	3143.79	3819.21	3952.68	3974.04
KLHL42	ENSG00000087448	709.948	709.925	603.353	465.959	533.93	516.81	590.53	479.295	491.042	575.124	547.264	516.28
GNAS	ENSG00000087460	13911.5	14339	14910.9	36813.1	31935.4	32355.1	24760.5	28194.3	26142.9	23626.9	23953	23436.5
DNM1L	ENSG00000087470	2097.8	2203.18	1896.54	1299.11	1496.41	1478.59	1702.99	1958.26	1745.66	1662.01	1803.26	1661.07
PTHLH	ENSG00000087494	27.1936	20.9727	19.1062	3.48598	3.01088	1.15877	1.8541	1.9563	3.22523	10.7226	7.73518	7.48231
PHACTR3	ENSG00000087495	0.971202	1.04863	0	17.4299	10.0363	8.11138	24.1033	31.3009	28.2208	13.647	13.5366	13.0941
ERGIC2	ENSG00000087502	972.173	1028.71	831.622	513.601	617.231	626.893	754.618	886.206	724.871	733.039	806.393	707.079
TFAP2C	ENSG00000087510	21.3664	20.9727	13.0727	3.48598	2.00726	2.31754	1.8541	0.978152	1.61262	8.77307	7.73518	5.61174
AURKA	ENSG00000087586	1964.74	2250.37	2170.06	264.934	268.972	245.659	310.561	318.878	358.807	840.266	882.778	877.301
CASS4	ENSG00000087589	135.968	151.003	153.855	250.99	296.07	261.882	335.592	336.484	250.762	232.974	252.36	215.117
PIR	ENSG00000087842	94.2065	88.0853	91.5086	115.037	92.3338	93.8602	117.735	139.876	129.816	105.277	102.491	103.817
AAMDC	ENSG00000087884	143.738	155.198	151.844	149.897	147.533	121.671	126.079	146.723	127.397	134.52	143.101	129.07
RFX2	ENSG00000087903	142.767	134.225	143.799	110.389	90.3265	86.9076	104.757	95.8589	99.1759	115.025	101.524	106.623
METTL2A	ENSG00000087995	429.271	486.566	489.722	306.766	290.048	302.438	355.06	308.118	350.744	353.847	344.216	368.504
SULT2B1	ENSG00000088002	0.971202	1.04863	4.02236	4.64797	2.00726	2.31754	3.7082	0	0.806308	2.92436	0.966898	1.87058
ALG6	ENSG00000088035	183.557	227.554	135.755	119.685	194.704	169.18	200.243	154.548	197.545	164.739	183.711	163.676
CNOT3	ENSG00000088038	929.44	928.041	1119.22	807.585	755.732	732.341	644.299	994.781	645.853	762.283	855.705	794.061
GP6	ENSG00000088053	3.88481	2.09727	6.03353	2.32399	2.00726	1.15877	0.927049	0.978152	2.41892	1.94957	1.9338	2.80587
PTPN4	ENSG00000088179	178.701	179.316	143.799	202.187	237.86	225.96	435.713	376.589	347.519	269.041	255.261	239.434
DDX18	ENSG00000088205	2987.42	3352.48	2664.81	988.856	1080.91	1110.1	1359.98	1336.16	1330.41	1752.67	1817.77	1639.56
KHSRP	ENSG00000088247	6805.21	6648.34	7277.45	3411.61	3214.62	3146.05	3304	3940.98	3276.03	4388.49	4374.25	4369.67
GNA11	ENSG00000088256	1870.53	1751.22	2061.46	1335.13	1091.95	1155.29	1029.95	1018.26	1132.86	1359.83	1224.09	1387.97
ASAP3	ENSG00000088280	415.674	448.815	484.694	1474.57	1356.9	1366.19	1080.94	999.672	1024.82	929.946	903.083	913.778
EDEM2	ENSG00000088298	224.348	206.581	228.269	285.85	213.773	236.389	171.504	183.893	206.415	215.428	192.413	214.181
DNMT3B	ENSG00000088305	148.594	154.149	163.911	228.913	234.849	257.246	270.698	253.341	220.122	208.604	205.949	204.828
REM1	ENSG00000088320	2.9136	4.19454	3.01677	33.6978	35.127	38.2393	23.1762	34.2353	29.8334	18.5209	24.1724	22.4469
TPX2	ENSG00000088325	11930.2	12852.1	12682.5	2182.22	2169.84	2041.75	2449.26	3128.13	2401.99	5459.78	5677.62	5409.71
FER1L4	ENSG00000088340	8.74081	4.19454	11.0615	1020.23	905.272	1013.92	457.962	347.244	453.951	448.402	406.097	451.745
PDRG1	ENSG00000088356	283.591	260.061	288.604	280.04	262.951	207.419	278.115	230.844	270.919	270.991	240.758	249.722
EPB41L1	ENSG00000088367	779.875	702.585	792.404	596.102	633.289	558.526	518.22	629.93	496.686	609.241	626.55	588.297
SLC15A1	ENSG00000088386	9.71202	10.4863	7.03912	0	1.00363	1.15877	3.7082	0	0.806308	4.87393	3.86759	2.80587
DOCK9	ENSG00000088387	712.862	722.509	672.739	813.395	977.534	921.22	1073.52	991.847	1032.07	842.215	862.473	855.79
ANKRD10	ENSG00000088448	653.619	630.229	546.035	1302.59	1384	1429.92	1441.56	1103.36	1302.99	1087.86	1001.71	1057.81
TGDS	ENSG00000088451	188.413	162.538	145.81	125.495	130.472	118.194	150.182	119.335	144.329	151.092	131.498	132.811
DOCK3	ENSG00000088538	141.795	131.079	135.755	201.025	197.715	195.832	211.367	158.461	145.135	177.411	155.671	150.582
C3orf18	ENSG00000088543	87.4081	74.453	98.5477	154.545	134.486	135.576	140.911	108.575	137.072	121.848	101.524	119.717
COQ9	ENSG00000088682	463.263	497.052	532.962	714.626	660.387	696.419	647.08	825.561	669.236	581.947	637.186	611.679
TMEM40	ENSG00000088726	0	1.04863	4.02236	20.9159	13.0472	18.5403	29.6656	29.3446	26.6082	16.5714	14.5035	16.8352
KIF9	ENSG00000088727	99.0626	118.496	122.682	91.7974	95.3446	81.1138	93.6319	84.1211	101.595	91.6299	94.756	99.1407
ARHGAP28	ENSG00000088756	236.002	229.651	250.392	1019.07	1227.44	1270.01	1769.74	1627.65	1612.62	984.534	1000.74	1042.85
CRLS1	ENSG00000088766	518.622	556.825	424.359	377.648	372.346	330.249	529.345	507.661	497.492	464.973	458.31	412.463
DEFB127	ENSG00000088782	0	0	0	0	0	0	0	0	0	0	0	0
PPP1R13B	ENSG00000088808	99.0626	111.155	125.699	152.221	161.584	156.434	124.225	185.849	141.91	118.924	146.968	135.617
ATRN	ENSG00000088812	1447.09	1394.68	1428.94	1374.64	1529.53	1622.28	1251.52	1257.9	1171.57	1307.19	1334.32	1332.79
SMOX	ENSG00000088826	248.628	204.484	273.52	238.209	242.878	241.024	220.638	231.822	232.217	227.125	217.552	239.434
SIGLEC1	ENSG00000088827	0	0	1.00559	5.80996	6.02177	4.63507	0	2.93446	4.83785	1.94957	2.90069	3.74116
FKBP1A	ENSG00000088832	3697.36	3855.83	3934.87	2354.2	2309.35	2125.18	2270.34	2289.85	2445.53	2691.38	2681.21	2737.59
NSFL1C	ENSG00000088833	1287.81	1350.64	1478.22	980.722	953.446	866.758	856.593	1293.12	973.214	1005	1147.71	1068.1
SLC4A11	ENSG00000088836	19.424	11.535	33.1844	33.6978	25.0907	26.6517	13.9057	12.716	12.9009	20.4705	15.4704	22.4469
C20orf194	ENSG00000088854	499.198	453.01	416.314	773.887	720.605	858.647	768.523	577.11	687.781	653.107	560.801	625.709
ZNF343	ENSG00000088876	202.981	173.025	211.174	247.505	211.765	241.024	253.084	230.844	220.122	226.15	197.247	215.117
EBF4	ENSG00000088881	19.424	16.7781	23.1285	79.0155	62.2249	68.3673	49.1336	52.8202	65.3109	45.8149	42.5435	50.5056
CPXM1	ENSG00000088882	592.433	519.074	650.616	2911.95	2768.01	2814.65	1980.18	2043.36	2051.25	1706.85	1722.05	1751.8
MAVS	ENSG00000088888	2360.99	2367.82	2466.71	3230.34	3081.14	3067.26	2667.12	2758.39	2525.36	2628.02	2626.09	2566.43
LZTS3	ENSG00000088899	82.5521	74.453	83.4639	196.377	164.595	178.45	148.328	148.679	143.523	134.52	124.73	129.07
F11	ENSG00000088926	0	0	0	1.16199	0	0	0	0.978152	0.806308	0	0	0
XRN2	ENSG00000088930	2726.16	3025.31	2787.49	1624.47	1578.71	1652.4	1835.56	2041.4	1843.22	2010.01	2109.77	2021.16
KIZ	ENSG00000088970	149.565	146.809	159.889	216.131	211.765	219.007	177.066	259.21	206.415	172.537	198.214	187.993
DYNLL1	ENSG00000088986	3081.62	3450.01	3406.94	2120.64	2038.37	1874.89	2075.66	2469.83	2257.66	2351.18	2528.44	2433.62
TESC	ENSG00000088992	3.88481	4.19454	9.0503	9.29594	3.01088	9.27014	2.78115	0.978152	2.41892	4.87393	2.90069	6.54703
SNX5	ENSG00000089006	3218.56	3269.64	3073.08	1387.42	1557.63	1484.38	1551.88	1443.75	1553.76	2009.03	1981.17	1952.88
RPL6	ENSG00000089009	7953.17	9088.51	9076.45	9526.02	8165.52	7773.01	10585	12146.7	11804.3	9034.32	9417.59	9469.8
SIRPG	ENSG00000089012	0	0	0	1.16199	3.01088	0	0	0.978152	0.806308	0	0.966898	0
MAPKAPK5	ENSG00000089022	640.022	656.445	655.644	425.289	377.364	411.363	414.391	414.737	391.866	478.62	459.276	465.774
P2RX7	ENSG00000089041	2.9136	9.43771	6.03353	8.13395	9.03265	6.95261	7.41639	9.78152	6.45046	5.84872	8.70208	6.54703
ESF1	ENSG00000089048	918.757	910.214	867.823	542.651	582.104	602.559	650.788	938.048	765.993	687.224	775.452	727.655
RBBP9	ENSG00000089050	535.132	548.436	506.817	307.928	385.393	341.837	448.692	519.399	488.623	422.082	463.144	437.715
ANAPC5	ENSG00000089053	2075.46	2180.11	2001.12	2458.78	2340.46	2487.87	1769.74	1520.05	1782.75	2002.21	1922.19	1979.07
SLC23A2	ENSG00000089057	607.001	635.472	576.203	744.837	711.572	769.422	638.737	626.018	544.258	635.561	630.417	595.779
SLC8B1	ENSG00000089060	155.392	143.663	137.766	297.47	238.863	249.135	158.525	140.854	156.424	191.058	167.273	170.223
TMEM230	ENSG00000089063	785.702	881.901	776.315	791.317	786.844	750.882	1075.38	818.714	1024.82	860.736	793.823	838.955
DZANK1	ENSG00000089091	42.7329	38.7995	49.2739	52.2897	64.2322	74.1611	72.3098	55.7547	73.374	54.588	51.2456	63.5997
KDM2B	ENSG00000089094	672.071	676.369	712.963	386.944	398.44	400.934	432.005	443.103	445.888	484.469	481.515	501.315
CFAP61	ENSG00000089101	3.88481	9.43771	7.03912	18.5919	14.0508	13.9052	30.5926	33.2572	26.6082	17.5461	18.3711	15.8999
LHX5	ENSG00000089116	33.0209	22.0213	31.1733	12.7819	23.0834	19.6991	24.1033	15.6504	23.3829	23.3949	19.338	24.3175
TASP1	ENSG00000089123	82.5521	89.1339	90.503	95.2834	65.2358	71.8436	106.611	86.0774	96.7569	91.6299	76.3849	85.1113
OAS1	ENSG00000089127	7.76961	12.5836	10.0559	36.0218	124.45	50.9858	55.6229	61.6236	45.1532	32.1679	63.8153	34.6057
GCN1	ENSG00000089154	3384.64	3293.76	3435.09	3153.65	2837.26	3132.15	2166.51	1928.92	2089.95	2773.27	2559.38	2716.08
RPLP0	ENSG00000089157	13271.5	14900	15359.4	15784.5	13931.4	13106.8	15277.8	13783.1	17245.3	14208.5	13594.6	14956.2
PXN	ENSG00000089159	3878.01	3808.64	4055.54	3479.01	3108.24	3327.98	2434.43	2413.1	2387.48	3123.21	2963.54	3076.17
SIRT4	ENSG00000089163	8.74081	6.2918	14.0782	27.8878	28.1016	27.8104	36.1549	16.6286	29.8334	23.3949	16.4373	23.3822
RPH3A	ENSG00000089169	8.74081	9.43771	4.02236	8.13395	6.02177	3.4763	0.927049	5.86891	0.806308	5.84872	6.76829	2.80587
KIF16B	ENSG00000089177	216.578	201.338	237.319	371.838	321.161	351.107	442.202	449.95	418.474	331.427	313.275	330.157
TRMT6	ENSG00000089195	922.641	929.09	860.784	283.526	322.165	283.898	349.497	481.251	349.938	510.788	547.264	478.868
CHGB	ENSG00000089199	147.623	162.538	140.782	170.813	186.675	179.609	145.547	220.084	148.361	148.167	182.744	149.646
PEBP1	ENSG00000089220	2500.84	2690.79	2720.12	2518.04	2096.58	2215.56	2458.53	2568.63	2742.25	2402.85	2346.66	2500.03
TBX5	ENSG00000089225	0.971202	0	1.00559	2.32399	4.01451	3.4763	3.7082	6.84707	2.41892	1.94957	3.86759	1.87058
BRAP	ENSG00000089234	498.226	473.983	511.845	384.62	381.379	353.424	397.704	430.387	396.703	413.309	409.965	406.851
ERP29	ENSG00000089248	1163.5	1274.09	1384.7	1322.35	1133.1	1101.99	931.684	1372.35	1048.2	1085.91	1207.66	1130.76
NOS1	ENSG00000089250	4.85601	1.04863	5.02795	1.16199	2.00726	3.4763	0.927049	4.89076	0.806308	1.94957	2.90069	2.80587
FUS	ENSG00000089280	9161.34	9432.46	10028.7	6171.34	6085	6143.79	5370.39	5940.32	5460.32	6673.39	6810.83	6873.44
IGBP1	ENSG00000089289	420.53	505.442	450.504	1029.53	812.939	867.917	1034.59	1229.54	1145.76	791.526	821.863	816.508
FXYD5	ENSG00000089327	1094.54	1144.06	1398.77	99.9314	105.381	92.7014	47.2795	85.0993	55.6352	410.385	413.832	479.803
ZNF302	ENSG00000089335	431.213	456.156	437.431	737.866	802.902	775.216	974.328	1139.55	1011.92	692.098	773.518	735.137
GRAMD1A	ENSG00000089351	528.334	514.879	605.365	906.355	814.946	784.486	559.01	600.586	576.51	625.813	617.848	621.967
FXYD3	ENSG00000089356	0	0	0	0	0	0	0.927049	0.978152	0.806308	0	0	0
HEPH	ENSG00000089472	324.381	336.611	358.995	685.576	649.347	730.024	538.615	480.273	518.456	489.343	469.912	507.862
CDIP1	ENSG00000089486	601.174	660.639	732.069	489.199	410.484	446.126	373.601	310.074	384.609	468.872	437.038	495.703
CMTM1	ENSG00000089505	18.4528	19.924	23.1285	26.7258	30.1088	38.2393	30.5926	36.1916	30.6397	24.3697	28.04	28.994
KCNH4	ENSG00000089558	1.9424	0	1.00559	2.32399	0	3.4763	0.927049	0.978152	0	1.94957	0	0.935289
GANAB	ENSG00000089597	7183.01	7516.61	7967.28	7453.02	7099.66	7169.3	4859.59	4311.7	4728.19	6190.87	6011.2	6227.16
GMIP	ENSG00000089639	134.026	147.857	152.85	254.476	243.882	247.976	131.641	132.051	151.586	161.814	167.273	173.029
RBM41	ENSG00000089682	150.536	187.705	187.04	177.785	207.751	242.182	216.929	259.21	229.798	176.436	209.817	212.311
BIRC5	ENSG00000089685	2265.81	2486.31	2519	447.367	484.752	425.268	578.478	672.969	624.889	1085.91	1141.91	1137.31
LAG3	ENSG00000089692	4.85601	4.19454	11.0615	10.4579	10.0363	12.7464	9.27049	5.86891	8.06308	7.79829	6.76829	10.2882
MLF2	ENSG00000089693	2653.32	2786.22	3141.46	2286.8	2127.69	2001.19	2022.82	3126.18	2283.46	2236.16	2570.01	2395.28
OTUB2	ENSG00000089723	50.5025	77.5989	57.3186	58.0996	75.2721	54.4621	68.6016	64.5581	65.3109	57.5124	69.6166	57.9879
DDX24	ENSG00000089737	3076.77	3420.64	3556.77	2389.06	2209.99	2126.34	2211.94	2682.09	2349.58	2473.03	2644.47	2583.27
ZBTB25	ENSG00000089775	527.362	554.727	541.007	299.794	275.998	286.216	362.476	315.943	324.942	386.99	363.554	370.375
NECAP1	ENSG00000089818	675.956	630.229	601.342	481.065	450.629	491.318	495.971	498.858	499.105	534.183	502.787	511.603
ARHGAP4	ENSG00000089820	635.166	710.974	794.415	375.324	387.4	310.55	304.999	448.972	375.739	424.032	491.184	475.127
ANKRD24	ENSG00000089847	6.79841	10.4863	7.03912	30.2118	15.0544	25.4929	16.6869	19.563	21.7703	16.5714	14.5035	17.7705
DHX32	ENSG00000089876	600.203	648.056	540.001	407.86	407.473	449.602	641.518	559.503	595.862	540.031	514.39	519.086
RCOR1	ENSG00000089902	768.22	755.016	743.13	773.887	856.095	867.917	950.225	892.075	895.808	806.148	800.591	809.961
GPATCH2L	ENSG00000089916	1029.47	1021.37	865.812	995.828	1091.95	1254.95	1485.13	1315.61	1258.65	1143.42	1098.4	1092.42
LTBP4	ENSG00000090006	410.818	381.703	484.694	1282.84	1192.31	1201.64	1054.98	1094.55	1154.63	865.61	860.539	920.325
BLVRB	ENSG00000090013	145.68	171.976	164.917	135.953	154.559	143.687	113.1	128.138	115.302	126.722	145.035	134.682
SLC9A1	ENSG00000090020	784.731	710.974	839.667	427.613	405.466	405.569	273.479	333.55	253.181	477.645	458.31	467.645
SPTLC1	ENSG00000090054	921.67	972.084	926.148	663.498	761.754	756.675	690.651	773.719	698.263	735.963	798.658	760.39
PAPOLA	ENSG00000090060	4569.5	4631.82	4065.6	1705.81	1971.13	1859.82	2845.11	3089.98	2918.83	3003.32	3074.74	2889.11
CCNK	ENSG00000090061	1767.59	1883.35	1897.55	985.37	1031.73	877.187	1024.39	1441.8	1012.72	1226.28	1385.56	1215.88
PCBP4	ENSG00000090097	876.024	934.333	1112.18	2048.59	1954.06	1905.01	1848.54	2143.13	2047.22	1513.84	1620.52	1648.92
RGS1	ENSG00000090104	0	1.04863	2.01118	0	1.00363	5.79384	3.7082	8.80337	4.83785	0.974786	3.86759	3.74116
YPEL3	ENSG00000090238	61.1857	60.8208	49.2739	235.885	193.7	172.656	162.234	162.373	157.23	143.294	134.399	122.523
MRPS33	ENSG00000090263	367.114	395.335	382.124	318.386	277.001	298.962	404.193	389.305	382.19	353.847	338.414	346.992
NDUFB2	ENSG00000090266	721.603	777.038	746.147	598.426	613.217	577.066	569.208	478.317	609.569	608.267	593.675	621.967
NUDC	ENSG00000090273	3565.28	3895.68	4140.01	1308.4	1245.5	1099.67	1007.7	1504.4	1175.6	1911.56	2093.33	2034.25
MAEA	ENSG00000090316	1057.64	1063.31	1063.91	825.015	832.008	803.026	707.338	758.068	681.33	832.467	844.102	809.025
ICAM1	ENSG00000090339	94.2065	90.1825	115.643	63.9096	69.2503	67.2085	89.9237	85.0993	79.0182	80.9072	78.3187	84.176
STRN4	ENSG00000090372	1509.25	1402.02	1654.19	1337.45	1186.29	1236.41	951.152	1231.49	1035.3	1212.63	1217.32	1245.81
IRAK3	ENSG00000090376	56.3297	46.1399	42.2347	42.9937	67.2431	66.0498	93.6319	86.0774	60.4731	63.3611	63.8153	54.2468
LYZ	ENSG00000090382	0	1.04863	0	4.64797	2.00726	0	0	0.978152	0.806308	0.974786	0.966898	0
SI	ENSG00000090402	0	0	0	0	0	0	0	0	0	0	0	0
MUL1	ENSG00000090432	457.436	467.691	491.733	503.143	444.607	424.109	305.926	295.402	378.965	400.637	383.858	413.398
TFAP4	ENSG00000090447	302.044	310.396	286.593	156.869	164.595	154.116	130.714	169.22	158.036	191.058	204.015	191.734
PDCD7	ENSG00000090470	496.284	523.268	546.035	453.177	483.749	433.379	470.014	420.606	445.888	457.175	454.442	458.292
SPG21	ENSG00000090487	1053.75	1139.87	1045.81	1042.31	1056.82	1013.92	1371.11	1301.92	1366.69	1124.9	1118.7	1125.15
FETUB	ENSG00000090512	0	0	0	6.97196	3.01088	11.5877	3.7082	6.84707	4.03154	2.92436	2.90069	4.67645
DNAJB11	ENSG00000090520	2540.66	2545.03	2756.32	1228.23	1235.47	1148.34	876.061	1119.98	970.795	1500.2	1548	1538.55
P3H2	ENSG00000090530	714.804	825.275	825.589	685.576	564.039	635.005	703.63	699.379	716.808	677.476	665.226	704.273
THPO	ENSG00000090534	4.85601	0	2.01118	8.13395	10.0363	10.4289	4.63524	9.78152	6.45046	5.84872	6.76829	5.61174
CHRD	ENSG00000090539	21.3664	26.2158	32.1789	232.399	221.802	206.261	96.4131	83.143	108.852	106.252	106.359	107.558
FLT3LG	ENSG00000090554	6.79841	5.24317	3.01677	6.97196	12.0435	8.11138	5.56229	2.93446	5.64416	5.84872	6.76829	5.61174
RAB11FIP3	ENSG00000090565	675.956	629.18	730.058	830.825	772.793	728.865	586.822	599.607	622.47	663.829	639.119	663.12
GNPTG	ENSG00000090581	271.936	264.256	299.666	725.084	573.072	565.479	382.871	367.785	416.055	427.931	386.759	405.916
ZNF268	ENSG00000090612	412.761	412.113	364.023	369.514	399.444	428.744	521.928	509.617	526.519	424.032	422.534	432.104
GOLGA3	ENSG00000090615	2803.86	2698.14	2790.51	3215.23	2863.35	3061.46	2290.74	1872.18	2194.77	2639.72	2366	2537.44
PABPC4	ENSG00000090621	5653.36	5657.38	5994.32	5648.45	5221.88	5207.5	4492.48	5066.83	4695.94	5045.49	5084.92	5074.88
CD209	ENSG00000090659	0	0	0	0	0	1.15877	0	0.978152	0	0	0	0
CERS4	ENSG00000090661	98.0914	119.544	113.632	210.321	221.802	152.957	114.954	158.461	143.523	131.596	160.505	131.876
MCOLN1	ENSG00000090674	228.232	206.581	223.241	237.047	241.874	227.119	111.246	136.941	127.397	181.31	186.611	179.576
USP48	ENSG00000090686	1234.4	1360.08	1270.06	1078.33	1091.95	1172.67	1063.32	1201.17	1136.89	1086.89	1164.15	1148.54
EFNB1	ENSG00000090776	661.388	700.487	811.51	1193.37	1247.51	1096.19	875.134	858.818	960.313	861.711	899.215	917.519
PDPR	ENSG00000090857	2328.94	2337.41	2181.12	1996.3	2127.69	2358.09	1927.33	1703.94	1687.6	2012.93	1962.8	1963.17
AARS1	ENSG00000090861	4040.2	4329.81	4483.92	1876.62	1790.47	1792.61	1487.91	1611.02	1702.92	2397.97	2436.58	2530.89
GLG1	ENSG00000090863	3930.45	3996.34	4195.32	5022.13	4784.29	5076.56	3462.53	3127.15	3080.9	3933.26	3795.07	3858.07
KIF4A	ENSG00000090889	1788.95	1860.28	1790.95	390.43	376.36	367.329	405.12	492.989	458.789	850.013	854.738	831.472
TNRC6A	ENSG00000090905	2098.77	1942.07	2008.16	1861.51	1895.85	2098.53	1814.23	1806.65	1712.6	1858.92	1801.33	1849.07
PLEKHG2	ENSG00000090924	1808.38	1574	1970.95	2577.3	2329.42	2395.17	1377.59	1799.8	1319.12	1808.23	1824.54	1765.83
DLL3	ENSG00000090932	28.1648	29.3618	26.1453	211.483	189.686	208.578	121.443	78.2522	115.302	111.126	95.7229	108.494
NAT14	ENSG00000090971	180.643	195.046	213.185	307.928	238.863	234.071	205.805	165.308	208.027	218.352	191.446	209.505
PITPNM2	ENSG00000090975	187.442	176.171	181.006	122.009	128.464	128.623	83.4344	89.0119	86.2749	125.747	124.73	124.393
EXOC1	ENSG00000090989	824.55	843.102	791.399	657.688	681.463	718.436	789.846	743.396	741.803	736.938	723.24	725.785
RBM27	ENSG00000091009	1268.39	1285.63	1074.97	505.467	571.064	585.178	820.438	932.179	771.637	852.938	885.678	789.384
POU4F3	ENSG00000091010	0.971202	1.04863	0	1.16199	1.00363	1.15877	1.8541	0	0	0.974786	0.966898	0
OSBPL8	ENSG00000091039	1618.02	1614.9	1242.91	569.377	827.993	776.374	1456.39	1290.18	1215.91	1210.68	1187.35	1064.36
DTX2	ENSG00000091073	133.055	101.717	145.81	117.361	133.483	99.654	88.9967	108.575	104.82	108.201	110.226	112.235
NLRC4	ENSG00000091106	23.3088	14.6809	14.0782	19.7539	26.0943	25.4929	21.3221	11.7378	14.5135	20.4705	16.4373	16.8352
PUS7	ENSG00000091127	755.595	881.901	742.125	317.224	330.194	304.756	412.537	425.496	419.28	486.418	517.29	474.192
LAMB4	ENSG00000091128	12.6256	3.1459	9.0503	16.2679	12.0435	8.11138	8.34344	6.84707	12.9009	11.6974	6.76829	10.2882
NRCAM	ENSG00000091129	695.38	669.028	605.365	837.797	1094.96	1019.72	1285.82	1350.83	1184.47	917.274	1002.67	920.325
LAMB1	ENSG00000091136	9650.83	9387.37	9925.16	18919.6	18187.7	19818.4	11779.1	11272.2	11955.9	12647.8	12440.1	13032.3
SLC26A4	ENSG00000091137	25.2512	18.8754	26.1453	4.64797	11.0399	9.27014	7.41639	12.716	7.25677	12.6722	13.5366	13.0941
SLC26A3	ENSG00000091138	0.971202	1.04863	1.00559	0	0	0	0.927049	0	0.806308	0.974786	0	0.935289
DLD	ENSG00000091140	1938.52	2090.98	1971.96	2021.87	2012.27	2042.91	2039.51	2099.12	2153.65	1929.1	1980.21	1994.04
WDR7	ENSG00000091157	394.308	393.238	388.157	396.24	401.451	400.934	426.442	419.627	414.442	391.864	387.726	388.145
TXNL1	ENSG00000091164	1424.75	1550.93	1421.9	1138.75	1268.59	1203.96	1417.46	1974.89	1512.63	1291.59	1534.47	1349.62
IL5RA	ENSG00000091181	0.971202	1.04863	1.00559	2.32399	0	0	0.927049	0.978152	0.806308	0.974786	0.966898	0.935289
ABCC6	ENSG00000091262	13.5968	5.24317	9.0503	23.2399	38.1379	37.0806	22.2492	11.7378	22.5766	18.5209	17.4042	21.5117
CMTM6	ENSG00000091317	1198.46	1140.91	947.265	496.171	575.079	566.637	640.591	519.399	640.208	764.232	706.802	693.985
ITGA6	ENSG00000091409	1672.41	1516.32	1376.65	5122.06	5636.37	6002.42	3766.6	3904.78	3843.67	3312.32	3563.02	3527.91
RAPGEF4	ENSG00000091428	18.4528	25.1672	21.1174	36.0218	29.1052	30.128	49.1336	31.3009	37.8965	33.1427	27.0731	28.994
MAP3K20	ENSG00000091436	1486.91	1582.39	1422.91	594.94	642.322	685.991	1082.79	1076.95	1036.91	1043.02	1047.15	1026.95
SMPX	ENSG00000091482	111.688	145.76	119.665	1596.58	1452.25	1402.11	1861.51	2194.97	1971.42	1136.6	1234.73	1176.59
FH	ENSG00000091483	1836.54	2072.1	2006.15	1145.73	1076.89	1091.56	1079.08	973.262	1131.25	1313.04	1303.38	1353.36
SEL1L3	ENSG00000091490	619.627	615.548	643.577	690.224	673.434	651.228	484.847	476.36	495.073	570.25	562.735	565.85
TF	ENSG00000091513	7.76961	1.04863	9.0503	34.8598	21.0762	28.9692	13.9057	13.6941	21.7703	17.5461	11.6028	18.7058
CDV3	ENSG00000091527	9957.73	10307	9603.38	5452.07	5413.57	5318.74	6237.18	6908.69	6268.24	7041.85	7183.08	6832.29
MYO15A	ENSG00000091536	1.9424	2.09727	4.02236	83.6635	79.2866	77.6374	43.5713	29.3446	25.8019	38.9914	35.7752	31.7998
ALKBH5	ENSG00000091542	1302.38	1305.55	1409.84	1082.98	954.45	951.348	1166.23	1123.9	1130.44	1147.32	1078.09	1129.83
APOH	ENSG00000091583	1.9424	0	1.00559	2.32399	2.00726	9.27014	2.78115	4.89076	1.61262	1.94957	1.9338	3.74116
NLRP1	ENSG00000091592	552.614	520.122	608.381	611.208	543.966	513.334	732.369	804.041	780.506	612.166	599.477	628.514
PITPNM3	ENSG00000091622	132.083	126.885	119.665	30.2118	49.1778	52.1446	57.477	44.995	60.4731	73.109	69.6166	74.8231
SPAG7	ENSG00000091640	667.215	721.46	825.589	1029.53	910.29	823.884	826	1094.55	883.713	800.299	875.043	819.313
ORC6	ENSG00000091651	658.475	719.363	690.84	199.863	192.697	169.18	190.972	228.888	195.127	343.125	358.719	334.834
ZFHX4	ENSG00000091656	2093.91	1848.74	1923.69	1756.93	2191.92	2443.84	2272.2	2723.18	2035.12	1988.56	2169.72	2040.8
SLC17A6	ENSG00000091664	121.4	166.733	120.671	65.0716	96.3483	90.3839	76.018	61.6236	66.9236	85.7812	102.491	87.9172
CPA1	ENSG00000091704	3.88481	1.04863	5.02795	11.6199	12.0435	15.064	5.56229	4.89076	2.41892	6.8235	5.80139	6.54703
ZC3HC1	ENSG00000091732	466.177	547.387	518.884	439.233	385.393	380.076	393.996	376.589	445.082	417.208	415.766	434.91
ESR1	ENSG00000091831	8.74081	4.19454	7.03912	15.1059	25.0907	28.9692	25.0303	22.4975	21.7703	15.5966	16.4373	18.7058
RGS17	ENSG00000091844	129.17	114.301	96.5366	61.5856	72.2612	62.5735	118.662	85.0993	91.1128	102.353	86.0539	82.3055
ANGPT2	ENSG00000091879	27.1936	26.2158	24.1341	25.5638	24.0871	17.3815	25.9574	19.563	24.9955	25.3444	22.2387	21.5117
TMEM101	ENSG00000091947	199.096	250.624	237.319	289.336	257.932	199.308	204.878	214.215	241.086	219.327	230.122	220.728
CD200	ENSG00000091972	165.104	159.392	151.844	159.193	171.62	186.562	189.118	230.844	209.64	165.714	179.843	178.64
CCDC80	ENSG00000091986	13245.2	13498	14256.2	5387	4836.48	5260.81	3377.24	4035.86	3372.79	7121.79	7031.28	7139.06
CMA1	ENSG00000092009	0	0	1.00559	1.16199	2.00726	0	2.78115	3.91261	1.61262	0.974786	1.9338	0.935289
PSME1	ENSG00000092010	375.855	386.946	440.448	632.124	519.879	546.938	556.229	730.68	614.407	497.141	526.959	520.956
PPP2R3C	ENSG00000092020	599.231	643.861	521.901	285.85	344.244	365.012	450.546	479.295	470.884	438.654	466.045	442.392
HAUS4	ENSG00000092036	340.892	368.071	378.101	311.414	255.925	224.801	275.333	302.249	291.883	297.31	294.904	290.875
JPH4	ENSG00000092051	130.141	113.252	139.777	188.243	163.591	183.085	117.735	128.138	112.077	137.445	129.564	135.617
MYH7	ENSG00000092054	158.306	142.614	141.788	17354.4	13630.3	15474.2	6423.52	7088.67	6581.89	7156.88	6756.68	6751.85
CEBPE	ENSG00000092067	2.9136	1.04863	6.03353	1.16199	2.00726	5.79384	5.56229	0.978152	2.41892	2.92436	0.966898	4.67645
SLC7A8	ENSG00000092068	48.5601	51.3831	78.4359	317.224	302.092	319.82	273.479	334.528	286.239	200.806	223.353	220.728
OSGEP	ENSG00000092094	449.666	427.843	461.565	542.651	546.977	516.81	354.133	378.545	324.136	425.982	432.203	407.786
SLC22A17	ENSG00000092096	214.636	210.775	263.464	574.025	437.582	504.064	288.312	271.926	298.334	333.377	294.904	332.963
RNF31	ENSG00000092098	596.318	557.873	624.471	567.053	501.814	565.479	355.987	370.72	378.965	482.519	454.442	491.962
SCFD1	ENSG00000092108	1054.72	1083.24	1012.63	873.819	946.421	924.697	974.328	1117.05	1013.53	938.719	1004.61	954.93
G2E3	ENSG00000092140	619.627	655.396	462.571	212.645	280.012	274.628	445.91	339.419	374.127	423.057	403.196	361.957
HECTD1	ENSG00000092148	3249.64	3281.18	3010.73	2971.22	3198.56	3465.87	3216.86	2946.2	3100.25	3045.23	3006.09	3064.94
HNRNPC	ENSG00000092199	8595.13	9092.7	9566.17	4033.28	4001.46	3808.87	4574.06	7373.31	4879.78	5606.97	6509.16	5877.36
RPGRIP1	ENSG00000092200	9.71202	9.43771	7.03912	3.48598	5.01814	6.95261	4.63524	6.84707	2.41892	5.84872	6.76829	4.67645
SUPT16H	ENSG00000092201	6843.09	7337.29	7276.44	3029.32	3039.99	3125.2	3235.4	4185.51	3387.3	4270.54	4610.17	4406.15
TOX4	ENSG00000092203	1397.56	1503.74	1531.51	1275.87	1219.41	1136.75	1156.03	1263.77	1160.28	1229.21	1270.5	1228.97
GEMIN2	ENSG00000092208	245.714	296.763	249.386	132.467	129.468	144.846	180.775	160.417	155.617	182.285	185.644	176.77
TGM1	ENSG00000092295	15.5392	10.4863	15.0838	25.5638	21.0762	25.4929	15.7598	11.7378	16.1262	17.5461	13.5366	17.7705
TINF2	ENSG00000092330	472.004	507.539	493.744	393.916	373.35	383.552	354.133	319.856	343.487	391.864	380.958	389.08
DAZL	ENSG00000092345	0	0	0	15.1059	17.0617	15.064	6.48934	3.91261	3.22523	6.8235	6.76829	5.61174
TBL1Y	ENSG00000092377	5.82721	4.19454	5.02795	9.29594	6.02177	12.7464	14.8328	7.82522	11.2883	9.74786	5.80139	9.35289
SEMA6A	ENSG00000092421	659.446	621.84	700.896	3720.7	4175.09	4149.55	2811.74	3167.26	2772.09	2246.88	2575.82	2405.56
TRPM7	ENSG00000092439	1002.28	891.339	808.494	776.211	874.16	971.047	962.277	971.305	915.966	889.98	875.043	866.078
TYRO3	ENSG00000092445	347.69	405.821	420.336	823.853	788.852	764.787	579.406	566.35	619.244	549.779	564.668	575.203
WDR76	ENSG00000092470	909.045	959.5	948.271	170.813	181.657	168.021	230.835	237.691	209.64	432.805	431.236	419.945
CAPN3	ENSG00000092529	8.74081	8.38907	13.0727	718.112	579.093	614.147	322.613	352.135	291.077	316.805	304.573	281.522
SNAP23	ENSG00000092531	806.097	835.761	777.32	470.607	554.003	515.652	627.612	583.957	569.253	620.939	627.517	599.52
TBX15	ENSG00000092607	70.8977	81.7934	93.5198	719.274	719.601	711.483	723.098	819.692	754.704	478.62	525.992	512.539
PHGDH	ENSG00000092621	1837.51	2006.04	2206.26	1659.33	1457.27	1411.38	1310.85	1365.5	1431.2	1538.21	1534.47	1617.12
COL9A3	ENSG00000092758	327.295	317.736	374.079	843.607	766.772	741.611	555.302	467.557	544.258	540.031	497.952	525.633
EZR	ENSG00000092820	3409.89	3652.39	3568.84	1218.93	1196.32	1101.99	1148.61	1471.14	1168.34	1884.26	1991.81	1854.68
MYL6	ENSG00000092841	12644.1	14518.3	14848.5	6823.22	6074.96	5558.61	6403.13	8255.61	6915.7	8382.19	9133.32	8773.01
AGO1	ENSG00000092847	1382.02	1409.36	1400.79	1211.96	1255.54	1337.22	1307.14	1278.45	1187.69	1259.42	1257.93	1253.29
TEKT2	ENSG00000092850	1.9424	4.19454	6.03353	15.1059	14.0508	19.6991	14.8328	10.7597	13.7072	9.74786	9.66898	12.1588
CLSPN	ENSG00000092853	1956.97	2152.85	2044.36	297.47	278.005	282.739	323.54	525.268	325.748	850.988	924.354	836.149
RFFL	ENSG00000092871	395.279	414.21	427.375	298.632	297.074	354.583	342.081	355.069	320.104	335.326	339.381	351.669
UNC13D	ENSG00000092929	4.85601	8.38907	6.03353	23.2399	19.0689	18.5403	10.1975	8.80337	9.67569	11.6974	11.6028	10.2882
MFSD11	ENSG00000092931	2030.78	1948.36	2185.15	1184.07	1306.72	1289.71	1052.2	1048.58	1048.2	1379.32	1364.29	1430.06
DPYSL2	ENSG00000092964	5703.87	5805.24	5567.95	3613.8	3770.63	3779.9	3993.73	4277.46	3954.94	4318.3	4404.22	4272.4
TGFB2	ENSG00000092969	1045.01	1102.11	1014.64	543.813	747.703	745.088	952.079	1137.59	879.682	835.392	953.361	854.854
GPATCH2	ENSG00000092978	255.426	273.693	219.218	238.209	232.842	288.533	319.832	353.113	305.591	264.167	275.566	263.752
NUP50	ENSG00000093000	1790.9	1960.95	1729.61	701.844	791.862	740.453	865.864	872.512	907.096	1098.58	1144.81	1085.87
CDC45	ENSG00000093009	887.678	976.278	944.248	124.333	129.468	120.512	115.881	178.024	121.752	372.368	400.296	372.245
COMT	ENSG00000093010	563.297	561.019	651.622	570.539	470.701	473.936	348.57	345.288	434.6	469.847	437.038	497.574
ADA2	ENSG00000093072	60.2145	56.6262	69.3856	106.903	100.363	88.0664	85.2885	89.0119	74.9866	79.9325	79.2856	73.8879
	ENSG00000093100	313.698	328.222	355.979	525.221	523.894	517.969	375.455	344.31	377.352	383.091	382.892	395.627
VNN3	ENSG00000093134	0	0	0	0	0	0	0	0	0	0	0	0
[truncated: 62,254 more rows]

## Sheet: 3_transformed_counts
gene_name	ensembl	SKGM_2d_1	SKGM_2d_2	SKGM_2d_3	KCTiP_7d_1	KCTiP_7d_2	KCTiP_7d_3	KCTiP_15d_1	KCTiP_15d_2	KCTiP_15d_3	baseline_1	baseline_2	baseline_3
TSPAN6	ENSG00000000003	8.99005	8.9849	8.90566	9.36022	9.32225	9.3129	9.39185	9.11349	9.39328	9.22606	9.1129	9.20327
TNMD	ENSG00000000005	5.94704	6.23889	6.35615	7.70251	7.77711	7.74627	7.54684	7.52592	7.73546	7.24639	7.33439	7.42381
DPM1	ENSG00000000419	9.37383	9.57252	9.39457	8.89473	8.92514	8.89239	9.14645	9.23933	9.2073	9.13788	9.23458	9.16605
SCYL3	ENSG00000000457	8.02478	7.98569	7.93442	7.92562	8.03743	8.03254	8.03113	8.00134	8.02856	7.96771	7.97087	7.9686
C1orf112	ENSG00000000460	8.36217	8.43398	8.36077	7.6701	7.81586	7.68402	7.85259	7.7858	7.93212	7.98441	8.01066	8.00399
FGR	ENSG00000000938	0.589851	0.351489	0.477872	0.850091	0.596471	0.498781	0.580498	0.345432	0.445516	0.698452	0.472093	0.467205
CFH	ENSG00000000971	9.44336	9.50913	9.4426	9.35049	9.35957	9.44367	9.22976	9.24756	9.27486	9.31026	9.33581	9.34825
FUCA2	ENSG00000001036	10.235	10.3186	10.2684	9.88265	9.82643	9.79181	9.68946	9.60574	9.74656	9.92837	9.913	9.92299
GCLC	ENSG00000001084	8.54004	8.62649	8.54636	7.92795	8.05076	8.06179	8.06616	8.13471	8.07345	8.19282	8.25731	8.21676
NFYA	ENSG00000001167	9.78685	9.79283	9.78467	9.55314	9.62252	9.7282	9.82289	9.79619	9.75466	9.70639	9.70125	9.72556
STPG1	ENSG00000001460	6.49303	6.68005	6.89862	5.66702	5.81295	5.97283	5.85687	5.83984	5.7493	6.05591	6.14373	6.27257
NIPAL3	ENSG00000001461	7.52802	7.44717	7.55395	7.43434	7.44578	7.65084	7.62699	7.44872	7.48441	7.50817	7.40876	7.52639
LAS1L	ENSG00000001497	9.84097	9.81212	9.82228	9.29553	9.28834	9.31504	9.12427	9.18442	9.09602	9.43807	9.41949	9.40606
ENPP4	ENSG00000001561	6.90065	6.84754	6.637	7.53656	7.68702	7.79061	7.79839	7.63558	7.73605	7.44702	7.42535	7.48038
SEMA3F	ENSG00000001617	7.53397	7.42024	7.5732	8.21181	7.96189	8.03219	7.52729	7.491	7.54462	7.74498	7.61733	7.68082
CFTR	ENSG00000001626	1.2446	1.13359	1.12771	1.51213	1.46925	1.61427	1.53997	1.95122	1.31114	1.46076	1.55387	1.34723
ANKIB1	ENSG00000001629	9.87459	9.90049	9.75015	9.51121	9.72272	9.79437	9.9315	9.84782	9.87138	9.77193	9.78653	9.78104
CYP51A1	ENSG00000001630	10.7139	10.7549	10.6611	10.7746	10.9161	10.8527	11.0384	10.9029	11.0909	10.8276	10.8238	10.8714
KRIT1	ENSG00000001631	8.99632	8.97818	8.89357	8.81877	9.05432	9.12632	9.1243	9.19756	9.14093	8.96656	9.04408	9.03213
RAD52	ENSG00000002016	7.34168	7.32808	7.26904	7.83732	7.98751	7.91204	7.72611	7.56166	7.74361	7.61259	7.62716	7.63995
MYH16	ENSG00000002079	1.35647	1.15728	1.46249	1.17624	1.26183	1.29574	1.24323	1.62463	1.21088	1.25498	1.35523	1.34594
BAD	ENSG00000002330	8.19695	8.25458	8.37855	8.14287	7.91292	7.94046	7.93086	7.69356	7.90791	8.06049	7.93569	8.06143
LAP3	ENSG00000002549	9.97206	10.1338	10.0963	9.59724	9.55132	9.47216	9.5293	9.44908	9.48876	9.68954	9.70943	9.68888
CD99	ENSG00000002586	12.2572	12.3162	12.4022	12.1174	12.0125	11.9657	11.8936	12.1439	11.9754	12.0636	12.1235	12.0983
HS3ST1	ENSG00000002587	5.056	5.13158	5.27945	6.59144	6.406	6.47604	6.57204	6.55261	6.61196	6.22306	6.16198	6.25901
AOC1	ENSG00000002726	-0.163486	-0.154411	-0.040257	-0.28198	-0.0405966	-0.282133	-0.168973	-0.162644	-0.302009	-0.163051	-0.164011	-0.167931
WNT16	ENSG00000002745	5.89382	5.91064	6.14019	5.96125	5.58778	5.84258	6.45476	6.39181	6.55154	6.11423	5.98512	6.2298
HECW1	ENSG00000002746	6.86809	6.6121	6.83797	6.44004	6.6943	6.61051	6.39825	6.68025	6.47014	6.56856	6.62987	6.60988
MAD1L1	ENSG00000002822	8.76809	8.76938	8.83967	8.30646	8.25462	8.19996	8.06375	8.14184	8.04188	8.38986	8.38008	8.37095
LASP1	ENSG00000002834	13.2009	13.2132	13.2726	12.183	12.1649	12.1787	12.061	12.1234	12.0938	12.5938	12.5754	12.6103
SNX11	ENSG00000002919	7.812	7.90684	7.86503	7.7227	7.43633	7.42551	7.54323	7.23003	7.69069	7.66435	7.51987	7.65655
TMEM176A	ENSG00000002933	5.48773	5.67688	5.81018	5.94104	6.13551	6.36883	6.03445	6.17903	6.14044	5.81567	5.98554	6.08688
M6PR	ENSG00000003056	10.2023	10.1779	10.2231	9.76167	9.80664	9.80081	9.72178	9.85656	9.70778	9.89211	9.91758	9.89318
KLHL13	ENSG00000003096	7.57559	7.64462	7.56199	8.19085	8.32915	8.44693	8.93649	8.91505	8.85919	8.36691	8.39254	8.42532
CYP26B1	ENSG00000003137	4.76183	4.09851	4.57469	5.21393	5.07516	5.16792	4.97013	5.03353	4.90458	4.96433	4.78563	4.86251
ICA1	ENSG00000003147	3.52848	3.47771	3.45286	3.42812	3.39993	3.4833	3.06311	3.21604	3.22585	3.32955	3.32505	3.35962
DBNDD1	ENSG00000003249	7.28149	7.41615	7.36406	7.26159	7.19126	7.15739	7.0382	7.34476	7.08998	7.16034	7.28293	7.17175
ALS2	ENSG00000003393	10.0505	10.0406	9.97534	10.0947	10.138	10.1696	10.0796	10.1109	10.0667	10.0422	10.0597	10.0373
CASP10	ENSG00000003400	1.90382	1.92806	1.70917	2.23363	2.09146	1.85491	2.06074	2.23519	2.00749	2.08014	2.07699	1.89198
CFLAR	ENSG00000003402	8.9493	8.72223	8.84389	9.30811	9.37505	9.44425	9.29848	9.30315	9.2597	9.16051	9.1395	9.1725
TFPI	ENSG00000003436	10.8716	10.8151	10.5685	9.98465	10.1616	10.1594	10.2888	10.3743	10.3269	10.4338	10.4408	10.339
NDUFAF7	ENSG00000003509	8.49836	8.41162	8.44613	8.44526	8.45709	8.41896	8.4754	8.49055	8.43425	8.44374	8.41653	8.40227
RBM5	ENSG00000003756	10.8575	10.8293	10.8713	11.7175	11.817	11.7773	11.5876	11.5794	11.5151	11.4024	11.4543	11.4098
MTMR7	ENSG00000003987	6.11602	6.10466	6.03163	5.759	6.16656	6.07616	6.43396	6.50631	6.4296	6.13082	6.24563	6.18606
SLC7A2	ENSG00000003989	9.50502	9.39885	9.28636	9.23765	9.33612	9.38364	9.53433	9.27802	9.38584	9.41349	9.29894	9.32371
ARF5	ENSG00000004059	9.54079	9.54852	9.65135	9.58042	9.52928	9.40679	9.44445	9.85584	9.55968	9.48742	9.62019	9.52004
SARM1	ENSG00000004139	8.69358	8.62993	8.74541	9.02747	9.06505	9.03806	8.86307	8.74435	8.79001	8.82898	8.79273	8.82044
POLDIP2	ENSG00000004142	10.8419	10.862	10.9369	10.3815	10.2633	10.2131	10.1911	10.2579	10.2367	10.4778	10.4545	10.4789
PLXND1	ENSG00000004399	9.73333	9.64173	9.83763	10.0761	9.98745	10.022	9.61211	9.55196	9.63266	9.77422	9.70639	9.7877
AK2	ENSG00000004455	10.8118	10.9045	10.9304	10.4737	10.4678	10.4269	10.4909	10.6263	10.5286	10.5772	10.639	10.6198
CD38	ENSG00000004468	1.49939	1.07994	1.19729	1.6533	1.41373	1.45491	1.39119	1.40641	1.25779	1.50059	1.30079	1.29287
FKBP4	ENSG00000004478	11.4723	11.5379	11.5482	10.3871	10.1788	10.2255	10.231	10.2647	10.3089	10.831	10.7999	10.8334
KDM1A	ENSG00000004487	11.7402	11.8122	11.8254	11.4396	11.355	11.3759	11.5039	11.551	11.4872	11.5429	11.5468	11.5499
RBM6	ENSG00000004534	10.7983	10.8468	10.8436	11.0437	11.0141	11.0444	10.8132	10.9767	10.7792	10.8487	10.9111	10.8485
CAMKK1	ENSG00000004660	6.72594	6.93578	6.91786	6.67045	6.60875	6.59987	6.36512	6.15584	6.39174	6.55779	6.56848	6.61557
RECQL	ENSG00000004700	10.6266	10.5936	10.4234	9.31904	9.49475	9.53727	9.57886	9.4327	9.56889	9.99064	9.92953	9.88637
VPS50	ENSG00000004766	8.50157	8.45272	8.2965	8.24921	8.4245	8.43426	8.51681	8.64962	8.59647	8.4092	8.47871	8.43248
HSPB6	ENSG00000004776	9.86941	9.88308	10.116	10.3635	10.2358	10.1769	10.1089	11.0235	10.259	10.087	10.4633	10.1609
ARHGAP33	ENSG00000004777	8.05449	7.76267	8.13303	8.48787	8.37138	8.37353	8.00799	8.07369	8.00146	8.15476	8.06365	8.12723
NDUFAB1	ENSG00000004779	9.60598	9.73879	9.63255	9.35818	9.29364	9.23589	9.47702	9.2875	9.44799	9.46	9.41764	9.42795
PDK4	ENSG00000004799	6.03815	6.02879	5.77029	7.73362	7.68269	7.80337	7.7318	7.65102	7.69177	7.35916	7.32187	7.37489
SLC22A16	ENSG00000004809	-2.21974	-2.21819	-2.21904	-2.21612	-2.1787	-2.21618	-2.22068	-2.2196	-2.2235	-2.21967	-2.21983	-2.2205
ZMYND10	ENSG00000004838	2.88989	2.72816	3.27459	3.59232	3.65413	3.59067	3.81129	3.99227	4.11219	3.48877	3.535	3.73879
ABCB5	ENSG00000004846	3.54915	3.77976	3.63251	4.1113	4.57689	4.5232	5.12244	5.23421	5.08179	4.46476	4.65927	4.58056
ARX	ENSG00000004848	4.4117	4.35438	4.33388	5.6611	6.0383	5.6757	5.76065	6.10594	5.86263	5.39348	5.71834	5.46534
SLC25A13	ENSG00000004864	9.42544	9.46458	9.42793	8.93553	8.88896	8.95526	9.10767	9.00104	9.13677	9.15539	9.10468	9.16443
ST7	ENSG00000004866	8.70231	8.7375	8.79139	8.36719	8.36367	8.27177	8.17967	8.3817	8.27949	8.40736	8.46497	8.4403
CDC27	ENSG00000004897	11.0953	11.1259	10.9549	10.3221	10.4343	10.426	10.7112	10.7735	10.6964	10.7432	10.7709	10.6923
SLC4A1	ENSG00000004939	-2.2195	-2.21805	-2.21884	-2.21611	-2.21888	-2.21616	-2.18261	-2.21936	-2.22301	-2.21943	-2.21958	-2.22021
CALCR	ENSG00000004948	0.332828	0.339373	0.335797	0.348113	0.583107	0.485819	0.859088	0.577965	0.728821	0.577276	0.459426	0.569026
HCCS	ENSG00000004961	8.77815	8.83087	8.80413	8.40365	8.55073	8.42364	8.63738	8.68525	8.64206	8.59765	8.65389	8.6116
DVL2	ENSG00000004975	9.54027	9.55125	9.67578	9.45462	9.40657	9.45213	9.26363	9.28123	9.39229	9.38997	9.37753	9.47649
PRSS22	ENSG00000005001	0	0	0	0	0	0	0	0	0	0	0	0
UPF1	ENSG00000005007	10.6894	10.6453	10.7411	10.396	10.3245	10.2973	10.1668	10.1083	10.1678	10.4054	10.338	10.3873
SKAP2	ENSG00000005020	8.47626	8.3728	8.41133	8.66016	8.72079	8.90868	8.92996	8.94692	8.89404	8.68008	8.67501	8.73447
SLC25A5	ENSG00000005022	11.8602	11.9411	11.817	11.0931	11.0021	11.0408	11.1356	10.9976	11.1967	11.4045	11.3618	11.3737
MCUB	ENSG00000005059	8.36046	8.3564	8.28162	7.46626	7.53604	7.39143	7.78523	7.70702	7.77705	7.92337	7.88087	7.85873
HOXA11	ENSG00000005073	3.58557	3.36455	3.92515	2.73557	2.98621	2.9066	2.73051	2.90414	2.42626	3.09929	3.0949	3.19073
POLR2J	ENSG00000005075	8.23081	8.24378	8.37194	7.78781	7.75016	7.72599	7.73337	7.79515	7.96119	7.91401	7.9105	8.02752
DHX33	ENSG00000005100	9.76299	9.7209	9.72646	9.09768	9.1611	9.08522	9.17771	9.0768	9.08183	9.36817	9.31295	9.3035
MEOX1	ENSG00000005102	3.17117	3.02296	3.26364	4.24549	3.8546	4.16571	4.49815	4.70337	4.50215	4.08437	4.04106	4.09203
THSD7A	ENSG00000005108	8.7067	8.57882	8.41729	8.82825	8.90735	8.94119	8.86471	8.77963	8.64994	8.76869	8.72744	8.6462
LIG3	ENSG00000005156	9.85425	9.86557	9.85483	9.61857	9.61417	9.69038	9.66901	9.66264	9.60033	9.69182	9.67928	9.68202
RPAP3	ENSG00000005175	9.3688	9.4011	9.26136	8.93326	8.929	9.04408	9.05392	9.26965	9.11386	9.11232	9.17694	9.11443
ACSM3	ENSG00000005187	6.14106	6.09874	5.89034	6.60989	6.75098	6.67667	7.22453	7.30715	7.04355	6.73345	6.80039	6.64312
REXO5	ENSG00000005189	7.44876	7.49811	7.39865	6.42789	6.22565	6.56353	6.23938	6.13984	6.15675	6.82541	6.75975	6.77509
CIAPIN1	ENSG00000005194	9.62058	9.80664	9.69697	9.30121	9.20817	9.20519	9.30711	9.12037	9.39216	9.39253	9.37747	9.42452
SPPL2B	ENSG00000005206	8.29434	8.24186	8.5125	9.356	9.24441	9.24529	8.75383	8.59849	8.79213	8.82337	8.7456	8.83617
FAM214B	ENSG00000005238	8.43143	8.3881	8.4673	8.56602	8.54927	8.49889	8.23413	8.46485	8.39	8.37572	8.43247	8.41538
COPZ2	ENSG00000005243	7.70812	7.68386	7.71477	8.44326	8.30145	8.35872	7.9775	7.7615	8.00977	8.02833	7.91864	8.01103
PRKAR2B	ENSG00000005249	7.55223	7.58653	7.57335	7.41621	7.50998	7.4792	7.77004	7.73761	7.62505	7.56899	7.57971	7.53751
MSL3	ENSG00000005302	8.88996	8.73383	8.84109	8.93291	8.90634	8.92203	8.90681	9.06406	8.90081	8.87669	8.87502	8.85653
CREBBP	ENSG00000005339	10.8828	10.7859	10.8667	10.9114	10.9805	11.0039	10.911	11.0907	10.7987	10.8692	10.9247	10.8501
TSPOAP1	ENSG00000005379	5.58631	5.56132	5.5318	6.50104	6.37151	6.32123	6.3389	6.24066	6.34244	6.16267	6.08718	6.10572
MPO	ENSG00000005381	-1.98678	-1.98433	-1.98567	-1.98106	-1.98573	-1.98115	-1.98826	-1.92285	-1.929	-1.98666	-1.98692	-1.98798
PON1	ENSG00000005421	-0.297913	-0.293398	-0.295864	0.108555	-0.161211	-0.143711	-0.052282	-0.164341	-0.308858	-0.043341	-0.165749	-0.300133
GCFC2	ENSG00000005436	8.58793	8.65027	8.39757	7.94742	8.08628	8.05042	8.49167	8.4285	8.45908	8.36726	8.37038	8.30712
WDR54	ENSG00000005448	7.61585	7.83474	7.84854	7.12779	6.85926	6.87822	6.93253	6.7623	7.04838	7.2385	7.22024	7.31302
CROT	ENSG00000005469	7.35893	7.45143	7.33754	7.13613	7.18142	7.32311	7.47991	7.15981	7.28253	7.31572	7.23221	7.27983
ABCB4	ENSG00000005471	3.4944	3.49352	4.21142	3.32997	2.98396	3.0493	2.8742	3.23533	2.88661	3.23346	3.22905	3.51652
KMT2E	ENSG00000005483	10.5902	10.5584	10.6144	10.3756	10.4068	10.4205	10.5309	10.9332	10.5483	10.4782	10.6214	10.5054
RHBDD2	ENSG00000005486	8.61272	8.59737	8.76619	8.69886	8.7606	8.47459	8.34514	8.38774	8.42751	8.51842	8.55318	8.5306
SOX8	ENSG00000005513	8.03469	7.97697	8.26615	8.58025	8.53187	8.52651	8.83988	8.80549	8.87835	8.50592	8.46253	8.58325
IBTK	ENSG00000005700	10.2006	10.2184	10.02	9.60601	9.76641	9.87709	10.0064	9.88414	9.95944	9.95123	9.93066	9.92642
ZNF195	ENSG00000005801	9.34535	9.22416	9.13585	9.28129	9.22563	9.27046	9.3653	9.35178	9.33547	9.30185	9.23262	9.22607
MYCBP2	ENSG00000005810	10.768	10.7526	10.6629	10.7062	10.7901	10.9212	10.8587	10.7086	10.6463	10.7527	10.7119	10.7045
FBXL3	ENSG00000005812	9.67307	9.70991	9.49597	9.23622	9.45977	9.40319	9.66376	9.53923	9.61407	9.5279	9.53354	9.48985
ITGAL	ENSG00000005844	-0.22573	-0.450332	-0.331365	-0.438844	-0.590633	-0.58374	-0.594452	-0.59187	-0.601152	-0.458506	-0.592427	-0.463129
PDK2	ENSG00000005882	7.92659	7.99641	8.13322	8.81716	8.73625	8.62503	8.44069	8.67721	8.43536	8.39909	8.48767	8.37791
ITGA3	ENSG00000005884	9.17683	9.10651	9.24946	7.5692	7.44827	7.54217	7.21501	7.14181	7.31658	8.33299	8.20699	8.34578
ZFX	ENSG00000005889	9.04651	9.06851	9.02414	8.98134	8.8833	9.02731	9.0737	9.08176	9.04832	9.00667	8.97723	9.00313
LAMP2	ENSG00000005893	10.8386	10.8703	10.7535	10.4261	10.6087	10.5902	10.6621	10.465	10.5856	10.6352	10.6185	10.6123
ITGA2B	ENSG00000005961	3.45663	3.3573	3.40812	4.53426	3.98176	4.34398	4.30375	3.92328	4.25517	4.15053	3.78152	4.05078
ASB4	ENSG00000005981	6.70872	6.8125	6.71529	9.58261	9.60026	9.64295	9.73578	9.83159	9.78714	9.22435	9.30706	9.31841
GDE1	ENSG00000006007	9.93461	10.021	9.97311	10.2198	10.1242	10.1539	10.1519	10.1432	10.194	10.0705	10.0608	10.0852
REX1BD	ENSG00000006015	7.38206	7.26335	7.60026	7.46763	7.50656	7.31879	6.97275	7.23889	7.15084	7.24734	7.3062	7.32907
CRLF1	ENSG00000006016	6.52875	6.58708	6.70256	6.19875	6.50492	6.39593	6.02075	6.10135	6.23821	6.24136	6.37995	6.41744
OSBPL7	ENSG00000006025	6.88089	6.70592	7.05116	7.55978	7.42499	7.62165	6.89355	6.80864	6.95095	7.10084	6.99779	7.18045
TMEM98	ENSG00000006042	9.21425	9.28443	9.36755	9.31095	9.31746	9.24084	9.17294	9.00846	9.21016	9.19681	9.17153	9.24024
YBX2	ENSG00000006047	2.81866	3.01271	3.06952	3.81854	3.54042	3.52307	3.7078	3.70319	3.577	3.47341	3.41734	3.3982
KRT33A	ENSG00000006059	0	0	0	0	0	0	0	0	0	0	0	0
MAP3K14	ENSG00000006062	8.62429	8.58699	8.64349	7.64505	7.65778	7.62077	7.40067	7.29996	7.33857	8.00685	7.93959	7.96661
ABCC8	ENSG00000006071	3.67173	3.5927	3.57196	4.24768	4.47358	4.86717	4.29653	4.2028	4.10355	4.08974	4.12237	4.23928
CACNG3	ENSG00000006116	-0.471678	-0.339511	-0.600801	-0.594179	-0.468075	-0.594306	-0.604532	-0.470896	-0.383123	-0.602229	-0.472164	-0.475803
TMEM132A	ENSG00000006118	9.77741	9.6972	9.79083	10.9266	10.7966	10.8387	10.2206	10.0888	10.2071	10.3416	10.261	10.2989
AP2B1	ENSG00000006125	12.586	12.6235	12.6116	12.1319	12.148	12.17	12.2168	12.2017	12.1961	12.3065	12.302	12.3103
TAC1	ENSG00000006128	5.64429	5.93893	5.73821	6.0227	6.24899	6.02042	6.18048	6.0265	6.10039	5.94774	6.04103	5.93984
ZNF263	ENSG00000006194	9.23928	9.33224	9.36246	9.34168	9.31976	9.33603	9.20979	9.34022	9.23883	9.2279	9.29194	9.27596
CX3CL1	ENSG00000006210	5.38759	5.27119	5.70823	5.87312	5.77992	5.74415	5.5488	5.73005	5.75294	5.57187	5.58201	5.70765
SPATA20	ENSG00000006282	8.13051	8.14176	8.25968	8.93938	8.88009	8.95533	8.31681	8.2724	8.46353	8.45617	8.44653	8.54064
CACNA1G	ENSG00000006283	6.88438	6.80654	6.94619	8.56024	8.56865	8.53868	8.24788	8.2087	8.33036	8.04388	8.05855	8.09753
TNFRSF12A	ENSG00000006327	9.87749	9.97276	9.99368	7.96161	7.96406	7.88063	7.83825	7.84428	7.93103	8.98725	9.00013	9.02509
DLX6	ENSG00000006377	-0.556439	-0.417746	-0.422393	-0.406353	-0.554895	-0.548148	-0.431387	-0.425457	-0.446687	-0.425839	-0.426737	-0.43041
MAP3K9	ENSG00000006432	7.3033	7.39532	7.20685	7.14498	7.0126	6.98599	7.10163	6.81668	6.88872	7.15678	7.05933	6.99932
RALA	ENSG00000006451	10.0268	10.0455	9.94173	9.61826	9.66247	9.67873	9.93366	9.91488	9.946	9.85479	9.84563	9.84565
BAIAP2L1	ENSG00000006453	7.38145	7.39773	7.40611	6.14151	6.13809	6.39426	6.43649	6.39811	6.2864	6.78309	6.7385	6.77619
KDM7A	ENSG00000006459	7.45752	7.34236	7.21549	7.80697	8.07858	7.97753	8.28122	8.12337	8.16937	7.88316	7.87238	7.85374
ETV1	ENSG00000006468	8.53403	8.53171	8.40539	8.75481	8.92057	8.96576	9.19782	9.29284	9.18654	8.84623	8.92979	8.89304
AGK	ENSG00000006530	9.2725	9.39197	9.32313	8.97046	8.86163	8.85459	8.94746	8.96468	8.94426	9.04571	9.05482	9.02847
ALDH3B1	ENSG00000006534	6.43799	6.44351	6.52719	7.02234	6.92867	6.96037	6.94415	6.90625	7.15576	6.78821	6.75053	6.90067
TTC22	ENSG00000006555	0.937093	1.07287	0.941348	1.09132	1.38047	1.21197	1.35527	1.37228	1.47041	1.17196	1.27316	1.264
PHTF2	ENSG00000006576	9.47746	9.50501	9.2334	8.77271	9.05185	8.92246	9.17612	9.07953	9.07452	9.16716	9.19088	9.05959
CCL26	ENSG00000006606	0.407056	0.168707	0.165535	0.176461	0.522184	0.314601	0.503082	0.291386	0.371733	0.407762	0.289805	0.285268
FARP2	ENSG00000006607	10.2307	10.2473	10.2085	9.87944	9.91978	9.92624	10.0501	9.85553	9.89776	10.04	9.97856	9.98386
USH1C	ENSG00000006611	2.41869	2.45225	2.82028	2.01941	2.57602	2.41368	2.24176	2.34432	2.02175	2.26041	2.41676	2.40232
GGCT	ENSG00000006625	9.40021	9.54387	9.3716	8.84452	8.75098	8.69017	8.93409	9.15078	9.03875	9.06621	9.15234	9.05037
DBF4	ENSG00000006634	9.31294	9.29293	9.17071	7.85825	7.98455	7.94377	8.28059	8.54578	8.36787	8.65955	8.69111	8.59072
TBXA2R	ENSG00000006638	3.87228	3.58937	3.74227	3.43179	3.51328	3.36808	3.19078	3.39366	3.06218	3.49598	3.49117	3.36872
IFRD1	ENSG00000006652	9.69173	9.79238	9.71092	8.70633	8.80658	8.75909	8.95359	8.84641	8.93121	9.19337	9.20911	9.18801
LGALS14	ENSG00000006659	0	0	0	0	0	0	0	0	0	0	0	0
COX10	ENSG00000006695	8.01087	7.94093	7.97876	7.83384	7.87237	7.78986	7.93037	7.99776	7.85911	7.90215	7.90215	7.8516
GTF2IRD1	ENSG00000006704	8.97944	8.97475	9.00363	9.09995	9.03257	9.01617	8.89478	8.91313	8.93211	8.95496	8.9354	8.94764
PAF1	ENSG00000006712	10.0139	10.0999	10.2334	9.85793	9.73468	9.76055	9.67262	10.091	9.72131	9.82266	9.9484	9.89226
VPS41	ENSG00000006715	9.68955	9.71135	9.63197	9.72578	9.7219	9.79381	9.85598	9.87367	9.84293	9.73065	9.7347	9.73417
ARHGAP44	ENSG00000006740	6.24352	6.25241	6.40745	6.99142	6.94163	7.04461	6.65113	6.69694	6.71658	6.62002	6.63836	6.70495
ELAC2	ENSG00000006744	10.4837	10.4924	10.6033	10.0727	9.97936	10.0384	9.72482	9.82869	9.8102	10.1052	10.0931	10.154
SCIN	ENSG00000006747	0.453706	0.798309	0.685681	0.341773	0.329373	0.479361	0.446969	0.45474	0.533307	0.45424	0.56917	0.562561
ARSD	ENSG00000006756	6.8746	6.96665	7.00046	7.95047	8.01795	7.94789	7.75063	7.6648	7.69689	7.56761	7.60426	7.57925
PNPLA4	ENSG00000006757	7.06679	7.15788	7.16531	7.04016	7.16362	7.05344	7.24088	7.36923	7.36894	7.09538	7.20159	7.195
MYH13	ENSG00000006788	3.99477	4.30067	4.01444	4.90344	4.76373	4.95034	4.62693	4.46443	4.47201	4.52373	4.48753	4.49412
ADIPOR2	ENSG00000006831	10.2798	10.3452	10.2967	10.2404	10.1988	10.2005	10.1852	10.0504	10.1958	10.2022	10.1633	10.1995
CDKL3	ENSG00000006837	5.17025	5.45282	5.28123	5.29726	5.54286	5.38663	5.75281	5.80949	5.67414	5.41475	5.57759	5.45312
UPP2	ENSG00000007001	0.264916	0.0240012	0.151867	0.170851	0.0209574	0.297995	0.015451	0.266246	0.230528	0.147788	0.146724	0.257902
PRSS21	ENSG00000007038	0	0	0	0	0	0	0	0	0	0	0	0
MARK4	ENSG00000007047	9.46402	9.44559	9.59664	9.71026	9.65582	9.59885	9.59433	9.75873	9.63863	9.55493	9.59354	9.58271
PROM1	ENSG00000007062	8.2638	8.202	8.2489	7.73268	7.94101	7.73041	8.22698	8.17832	8.26023	8.08732	8.07382	8.10303
CCDC124	ENSG00000007080	9.90972	9.94317	10.0764	9.46037	9.35317	9.13809	9.31701	9.73622	9.4479	9.56474	9.66242	9.60059
CEACAM21	ENSG00000007129	-0.678595	-0.79082	-0.795078	-0.920281	-0.928963	-0.920476	-0.931885	-0.92991	-0.81734	-0.798234	-0.930336	-0.802423
PAFAH1B1	ENSG00000007168	11.7326	11.746	11.6613	11.3412	11.3825	11.4004	11.5881	11.3688	11.477	11.5458	11.4709	11.489
NOS2	ENSG00000007171	1.7887	1.74789	1.37608	1.18288	1.03009	1.04925	1.25073	1.15018	1.21755	1.46389	1.36486	1.25284
DNAH9	ENSG00000007174	4.73445	4.65359	4.96144	6.04174	6.12787	6.25582	6.04757	6.28172	6.20125	5.70982	5.87201	5.91917
KIAA0100	ENSG00000007202	11.9643	11.9389	11.9937	11.7566	11.7083	11.7782	11.6178	11.5389	11.553	11.7565	11.6984	11.7428
SLC13A2	ENSG00000007216	0	0	0	0	0	0	0	0	0	0	0	0
GAS7	ENSG00000007237	9.14678	9.20995	9.33418	10.0213	9.95055	10.0018	9.96262	10.0212	9.9367	9.7345	9.75553	9.76852
TRAPPC6A	ENSG00000007255	5.39876	5.61958	5.62696	6.53029	6.29481	6.27944	6.11214	6.20067	6.33187	6.05024	6.04353	6.10856
MATK	ENSG00000007264	2.11673	2.23342	1.81521	2.44328	2.45314	2.17552	2.48431	2.36828	2.4786	2.36679	2.36329	2.19134
CEACAM7	ENSG00000007306	0	0	0	0	0	0	0	0	0	0	0	0
CD79B	ENSG00000007312	2.88803	2.74932	2.64171	3.94387	3.83828	3.60065	3.31121	3.28726	3.23163	3.39272	3.33553	3.20533
SCN4A	ENSG00000007314	4.69833	4.63152	4.71288	7.01408	7.03917	7.10694	6.49405	6.43191	6.60846	6.34538	6.38541	6.46112
ST7L	ENSG00000007341	8.26871	8.28825	8.22433	8.50827	8.63941	8.638	8.63179	8.68869	8.61815	8.44866	8.51866	8.48219
TKTL1	ENSG00000007350	5.40696	5.61179	5.73075	7.22233	7.25043	7.18252	7.55351	7.53767	7.54478	7.01468	7.04418	7.06715
PAX6	ENSG00000007372	6.40279	6.43461	6.40399	7.03013	7.03426	7.03547	7.60695	7.94812	7.52889	7.1047	7.29653	7.09864
RPUSD1	ENSG00000007376	8.20858	8.16813	8.32254	7.90446	7.74272	7.69985	7.39998	7.56698	7.55713	7.84783	7.81061	7.86897
RHBDF1	ENSG00000007384	8.62398	8.46966	8.7016	9.25794	9.22007	9.22143	8.63122	8.63472	8.68907	8.82065	8.79015	8.83792
LUC7L	ENSG00000007392	9.6352	9.65411	9.68006	10.3578	10.3859	10.3486	10.0734	10.0829	10.0353	10.0115	10.0491	10.0087
CACNA2D2	ENSG00000007402	6.69688	6.68766	6.79216	7.19688	7.20727	7.02915	6.88052	7.11661	6.98098	6.89513	6.99646	6.90852
BAIAP3	ENSG00000007516	7.85192	7.97464	8.01414	8.00156	7.91776	7.88779	7.79665	8.1928	7.85852	7.84752	7.99909	7.88839
TSR3	ENSG00000007520	9.18611	9.20477	9.31405	9.09102	8.96076	8.90201	8.78917	9.00999	8.81227	8.99673	9.02314	8.992
PIGQ	ENSG00000007541	8.25814	8.22908	8.51101	8.56861	8.36828	8.43372	7.97152	7.87293	7.99288	8.23884	8.13632	8.27624
CRAMP1	ENSG00000007545	9.15515	8.96302	9.05121	9.45713	9.45175	9.41444	9.26089	9.04988	9.15486	9.25682	9.14043	9.17276
TEAD3	ENSG00000007866	9.35246	9.25074	9.46567	9.24624	9.08391	9.10784	9.00463	9.16714	9.02533	9.17318	9.13066	9.17619
SELE	ENSG00000007908	-2.21975	-2.2182	-2.1786	-2.21612	-2.21908	-2.21618	-2.22069	-2.2196	-2.22351	-2.21967	-2.21984	-2.22051
DNAJC11	ENSG00000007923	10.6131	10.5589	10.6453	10.2555	10.1435	10.1898	10.1118	10.2131	10.1147	10.3174	10.2782	10.3019
FMO3	ENSG00000007933	1.88666	1.7889	1.78062	2.33402	2.49918	2.33288	2.64523	2.26387	2.67327	2.34118	2.1755	2.32326
MYLIP	ENSG00000007944	6.67551	6.51411	6.55087	8.02869	8.0258	7.94725	8.02867	7.89488	7.87609	7.69311	7.63303	7.59522
NOX1	ENSG00000007952	2.17026	1.91968	2.00656	1.71221	2.00592	1.71169	2.37154	2.52676	2.63519	2.0871	2.1685	2.23332
E2F2	ENSG00000007968	8.16133	8.18348	8.12146	7.24708	7.31828	7.19993	7.34812	7.47073	7.33244	7.65079	7.68074	7.5976
PSMB1	ENSG00000008018	10.9559	11.1095	11.0362	10.4026	10.3775	10.3339	10.3887	10.4347	10.3783	10.5925	10.6475	10.596
SYN1	ENSG00000008056	6.50428	6.52795	6.62469	6.38667	5.97632	6.07409	6.09597	6.31572	6.03038	6.3026	6.25399	6.23695
JARID2	ENSG00000008083	9.37525	9.28906	9.33071	9.54708	9.51398	9.51843	9.5715	9.61906	9.55573	9.46829	9.44868	9.44607
CDKL5	ENSG00000008086	7.22815	7.37065	7.28754	7.80717	7.81489	7.94472	8.07569	7.847	7.81217	7.7308	7.6665	7.68248
CAMK1G	ENSG00000008118	2.58643	2.69344	2.74139	2.88119	2.52483	2.30842	2.32949	2.58959	2.80282	2.58806	2.58447	2.63963
CDK11A	ENSG00000008128	7.56877	7.62919	7.76625	7.89846	7.88819	8.02693	7.52533	7.77708	7.47581	7.63034	7.73572	7.71837
NADK	ENSG00000008130	9.27214	9.34392	9.37877	9.18623	9.10594	9.12803	8.97946	8.82436	8.98913	9.11684	9.06801	9.13485
TFAP2B	ENSG00000008196	6.12738	6.13049	6.05839	6.08055	6.34657	6.17452	6.18793	6.16757	6.17908	6.10694	6.18017	6.10784
TFAP2D	ENSG00000008197	0	0	0	0	0	0	0	0	0	0	0	0
DLEC1	ENSG00000008226	7.14851	7.09664	7.17199	7.49239	7.36157	7.26859	7.13893	7.31293	7.35323	7.22807	7.22671	7.24202
CYTH3	ENSG00000008256	10.6257	10.6316	10.6421	10.8482	10.797	10.7809	10.5717	10.6657	10.5846	10.6451	10.6629	10.6299
ADAM22	ENSG00000008277	6.92289	6.8091	6.95169	7.05782	7.20992	7.23171	7.42397	7.39065	7.31118	7.13757	7.13056	7.15424
SYPL1	ENSG00000008282	9.59048	9.69266	9.44665	8.98315	9.12481	9.07569	9.41038	9.07985	9.32051	9.34335	9.29294	9.27166
CYB561	ENSG00000008283	6.29979	6.24147	6.47474	6.3498	6.43618	6.16921	6.32126	6.13807	6.55616	6.29242	6.24302	6.40387
SPAG9	ENSG00000008294	11.3937	11.3539	11.3	11.1257	11.1647	11.2426	11.3264	11.1894	11.2846	11.2649	11.1988	11.2466
CELSR3	ENSG00000008300	8.19551	7.91931	8.18253	8.55056	8.51124	8.54801	8.42753	8.12673	8.29353	8.36038	8.17955	8.308
AASS	ENSG00000008311	8.54013	8.42812	8.48557	9.47312	9.45929	9.59925	9.32092	9.23017	9.20862	9.13475	9.09328	9.14093
PLEKHG6	ENSG00000008323	2.92033	2.96063	3.1101	2.64091	2.87442	2.94734	2.7016	2.3987	2.76602	2.72416	2.7205	2.90069
SS18L2	ENSG00000008324	7.45104	7.66679	7.50959	6.86717	7.01713	7.13023	7.1996	7.01685	7.2541	7.18586	7.23598	7.28193
MPND	ENSG00000008382	6.87514	6.8708	6.98919	7.18777	7.03412	7.12568	6.91317	6.99227	7.0419	6.95577	6.93517	7.01753
MGST1	ENSG00000008394	8.08727	8.24197	8.15383	8.46253	8.42512	8.44846	8.64181	8.69903	8.64593	8.39158	8.43988	8.42256
CRY1	ENSG00000008405	9.12013	9.22384	9.04093	8.41801	8.27496	8.30959	8.37927	8.17253	8.30386	8.67438	8.61828	8.57127
PGLYRP1	ENSG00000008438	0.125481	0.264041	0.128071	0.405189	0.377105	0.404655	0.361986	0.254594	0.335678	0.254127	0.253026	0.248525
NFIX	ENSG00000008441	10.2443	10.2213	10.3966	10.1362	10.1608	10.1159	9.99564	10.1655	9.98229	10.0957	10.1436	10.1366
ST3GAL1	ENSG00000008513	8.46804	8.4926	8.45199	8.26781	8.21927	8.18895	8.20021	8.1999	8.23552	8.28642	8.27092	8.26637
MMP25	ENSG00000008516	4.79166	4.61211	4.75461	5.75917	5.68672	5.65126	5.16648	5.05702	4.86915	5.24532	5.17898	5.09028
IL32	ENSG00000008517	8.30229	8.42216	8.47215	8.32327	8.12083	8.11418	8.75101	8.98841	8.81965	8.4621	8.54008	8.51717
PKD1	ENSG00000008710	9.60067	9.51586	9.64485	10.3963	10.273	10.4206	9.8744	9.58589	9.73519	9.94859	9.81462	9.9208
MAPK8IP2	ENSG00000008735	7.35	7.42051	7.44225	7.63861	7.6268	7.61159	7.44069	7.51536	7.46332	7.44054	7.48659	7.47167
MED24	ENSG00000008838	10.1395	10.0769	10.1959	10.0595	9.93714	9.96835	9.68916	9.64379	9.76074	9.93898	9.85815	9.94272
RHOBTB2	ENSG00000008853	9.2202	9.24473	9.38497	9.4207	9.25821	9.32953	9.12709	9.19979	9.19339	9.21906	9.19557	9.26548
HEATR5B	ENSG00000008869	9.01121	9.01932	8.96274	9.16282	9.21077	9.34379	9.17249	9.20363	9.07969	9.08442	9.11214	9.09652
SEC62	ENSG00000008952	11.0567	11.0832	10.9976	11.0296	11.0292	11.0566	11.1184	11.2333	11.1653	11.0396	11.0819	11.0525
RPS20	ENSG00000008988	12.8056	12.915	12.8857	12.9421	12.8221	12.7789	13.0569	13.0104	13.1692	12.9095	12.8811	12.9521
CSDE1	ENSG00000009307	13.7364	13.8038	13.7312	13.5604	13.5393	13.5621	13.7795	13.813	13.8197	13.6726	13.687	13.6932
UBE3C	ENSG00000009335	10.9457	10.891	10.8164	10.2308	10.2843	10.2902	10.3289	10.0943	10.2812	10.531	10.432	10.4547
REV3L	ENSG00000009413	9.85249	9.80354	9.69834	10.3541	10.4929	10.6892	10.7344	10.6846	10.6525	10.3497	10.3603	10.4104
TENM1	ENSG00000009694	6.3304	6.36562	6.24796	7.37902	7.78161	7.90179	8.02428	7.99824	7.85377	7.43531	7.55957	7.53391
PAX7	ENSG00000009709	8.75867	8.77389	8.93767	8.1168	8.12785	8.14008	8.94365	9.11391	8.91182	8.65787	8.71104	8.72473
MASP2	ENSG00000009724	6.01137	5.85843	5.94634	6.71627	6.85524	6.90757	6.46873	6.95879	6.71762	6.38692	6.6315	6.56217
IYD	ENSG00000009765	-1.52978	-1.52585	-1.52799	-1.52059	-1.52809	-1.52074	-1.32736	-1.52941	-1.43691	-1.42719	-1.53	-1.53171
FAM76A	ENSG00000009780	7.46425	7.47062	7.46232	7.76831	7.70444	7.6556	7.94808	7.80015	7.88301	7.71573	7.63361	7.66732
TRAF3IP3	ENSG00000009790	4.95508	4.92552	5.02505	4.53321	4.56774	4.37414	4.51257	4.41791	4.67839	4.66516	4.63103	4.71518
POMT2	ENSG00000009830	8.90124	8.91702	8.95032	9.1858	9.0511	9.0085	8.79878	8.74042	8.77973	8.9261	8.87157	8.87147
VTA1	ENSG00000009844	10.4202	10.4224	10.2692	9.68391	9.72108	9.75205	10.0737	10.0993	10.1345	10.0883	10.0754	10.0591
MLXIPL	ENSG00000009950	2.07588	2.09335	2.29483	2.91837	3.12041	2.84882	2.85873	2.94591	2.72684	2.62168	2.75698	2.60305
BAZ1B	ENSG00000009954	11.9596	11.9551	11.9524	11.415	11.379	11.3944	11.4027	11.586	11.3763	11.6012	11.6231	11.5702
RANBP9	ENSG00000010017	9.90645	9.93224	9.84002	9.49893	9.50372	9.48597	9.64353	9.63426	9.60287	9.67364	9.66316	9.62496
ETV7	ENSG00000010030	1.33154	1.34336	1.6693	1.90688	1.66871	1.90582	1.73627	1.75447	1.91578	1.65994	1.55723	1.82475
SPRTN	ENSG00000010072	8.18153	8.10618	8.00202	7.62514	7.68342	7.56273	7.78632	7.92338	7.82589	7.87066	7.87794	7.79023
[truncated: 64,006 more rows]

## Sheet: 4_SKGM_2_vs_baseline
gene_name	ensembl	log2FoldChange	pvalue	FDR	Mean_baseline	Mean_SKGM_2
[truncated: 64,253 more rows]

## Sheet: 5_KCTiP_7_vs_baseline
gene_name	ensembl	log2FoldChange	pvalue	FDR	Mean_baseline	Mean_KCTiP_7d
[truncated: 64,253 more rows]

[truncated: 23 more sheets: 6_KCTiP_15_vs_baseline, 7_KCTiP_7_vs_SKGM_2, 8_selected_list for figure 3C , 9_FILT-0.2-cluster-1, 10_FILT-0.2-cluster-2, 11_FILT-0.2-cluster-3, 12_FILT-0.2-cluster-4, 13_FILT-0.2-cluster-5, 14_FILT-0.2-cluster-6, 15_FILT-0.2-cluster-7, 16_FILT-0.2-cluster-8, 17_FILT-0.2-cluster-9, 18_FILT-0.2-cluster-10, 19_Clust1_GO_Biological_Process, 20_Clust2_GO_Biological_Process, 21_Clust3_GO_Biological_Process, 22_Clust4_GO_Biological_Process, 23_Clust5_GO_Biological_Process, 24_Clust6_GO_Biological_Process, 25_Clust7_GO_Biological_Process …]
